# Supplementary material for: The molecular appearance of native TRPM7 channel complexes identified by high-resolution proteomics
Source: eLife. 2021 Nov 12;10:e68544. doi: 10.7554/eLife.68544 (PMC8616561; doi:10.7554/eLife.68544)
Supplement: Supplementary file 1. [file elife-68544-supp1.xlsx]

## Sheet: mb_CL47_PVs
mouse brain, CL-47		Related to Figure 1C
Mark: U = peptide unique to the protein, N = peptide shared by other proteins
Sequence: amino acid sequence of the peptide in single letter code with all isoleucin residues label as leucin, since their masses cannot be
Protein description: UniProtKB Entry Name | Accession number, protein name
Volume: Peakvolumes of peptides identified by MS/MS are shown in bold, peakvolumes identified by MS1 and assigned to peptides based on their m/z and elution time are shown in regular fond.
TUC = affinity purification with a target unrelated control antibody
					sample:	anti-M7a	anti-M7b	anti-M7c	anti-M7d	TUC1	TUC2	TUC3	TUC4
Mark	Sequence	Modifications	m/z	Charge	Mass	Volume	Volume	Volume	Volume	Volume	Volume	Volume	Volume
	PLEC_MOUSE|Q9QXS1	Plectin
U	LLAEENQR		486.759	2	971.504	108030	14916.1	6298600	17566.1	1500800	7642.1	4270300	7532462
U	AQLEPVASPAK		555.811	2	1109.61	64592.1		3650400	380250	619060	94394.1	2621300	3594000
U	ELLPAEEALR		570.817	2	1139.62	79418.1		6190000		1513100	44437.1	4217300	5017385
U	LQLETTER		495.267	2	988.519	115020		7.469e+06		1772700	74924.1	5149600	6293692
U	SAEVELQSK		495.759	2	989.503	37411.1		3.7278e+06		593560	24777.1	2602800	2532308
U	TLQEEHVTVAQLR		508.611	3	1522.81	53815.1		8.8038e+06		1156800	66805.1	6147300	5612923
U	VTQLLER		429.756	2	857.497	137665	43751.1	6.1028e+06		1470400	74883.1	4507600	5135231
U	TLSLVLR		401.263	2	800.512	47916.1		3673200		826880	19873.1	2562500	4061692
U	FAEQTLR		432.732	2	863.45	64005.1		5538200		1.0209e+06	49479.1	3084800	4829385
U	LLFNDVQTLK		595.843	2	1189.67	95883.1		10040000		2045600	46268.1	6188200	8492462
U	VALEEVER		472.756	2	943.497	60514.1		3610800		909840	49828.1	2.1917e+06	2779077
U	VPGAQDGVR		449.741	2	897.467	60335.1		5220200		856100	25553.1	3026600	3408154
U	LAQGHTTVAELTQR		508.942	3	1523.81	99511		13091400		2083900	67764.1	8396600	9418769
U	AGVVGPELHEK		379.208	3	1134.6	63939.1		5488600		1069900	35751.1	2777300	4182769
U	LLEAQVATGGLLDPVHSHR		504.027	4	2012.08	124400		8142600		2015900	69115.1	4282300	7454000
U	AQAEAQQPVFNTLRDELR		696.027	3	2085.06	80121.1		8206800		1894800	66359.1	3790800	8.42785e+06
U	SSLAGLLLKPTNEK		490.956	3	1469.85	76793.1		5748400		1409700	57434.1	3.8936e+06	7014923
U	VSLDEALQR		515.78	2	1029.55	140070		11322600	35485.1	1930400	89280.1		8210769
U	LAAEQELLR		521.798	2	1041.58			12818000	30563.1	2402800	88962.1	6580500	7009692
U	RQELEAELAK		593.825	2	1185.64	51450.1		5748200		926820	19805.1	1808800	3988923
N	VLADPSDDTK		530.761	2	1059.51			3344400		502920	25012.1	2379700	2272769
U	ANELQLR		422.238	2	842.461	97511.1			34431.1	1067000	44399.1	3130000
U	GGELVYTDTEAR		655.815	2	1309.61	95287.1		8153000		1287800		5349700	6019231
U	AGVGAPVTQVTLQSTQR		856.968	2	1711.92	50881.1		4840400		845700		1613200	3524615
U	AQFDQLKDGK		383.868	3	1148.58	42772.1		4.7218e+06		876330		1557400	3516462
U	EVAEADSVR		488.241	2	974.467	37569.1				665580	14009.1	2241800	2769692
U	AQVEQELTTLR		644.349	2	1286.68	106350				1382400	47039.1	5422900	6727077
U	AKLEQLFQDEVAK		506.944	3	1517.81	89528.1		8368200		1559900		4.8193e+06	7306615
U	LLPLTDK		400.25	2	798.485	30661.1		2.2768e+06		376580		1247400	2.00431e+06
U	TEVVETTQVYTEEETRR		690.671	3	2068.99			7125800		1764282	71327.1	4922100	6286462
U	AGLVGPELHEK		383.88	3	1148.62			5619600		1305900	46257.1	3883300	5539538
U	SLQEELQHLR		418.226	3	1251.66			6.1098e+06		1161800	34008.1	4.0658e+06	5.98046e+06
N	GYFDEEMNR		580.737	2	1159.46	62348.1		8131800		1606900		5735000	6896923
U	GGAEGELQALR		550.788	2	1099.56	83232		8068200		1406900		4282400	5681538
U	LQAEEVAQQK		572.304	2	1142.59	93310		8330400		1268300		4170000	5544462
U	SALDQYR		426.714	2	851.414	46531.1		3045000		791270		1707900	2.92615e+06
U	GHVPLLAVCDYK	Carbamidomethyl	457.908	3	1370.7	37275.1		3652200		594520		2214200	2683231
U	LQAEEAER		473.235	2	944.456			2363800		263930	22595.1	1380400	1.59323e+06
U	RLEEQAALHK		398.891	3	1193.65			6006400		907330	30912.1	3429300	4026000
U	LGFHLPLEVAYQR		514.952	3	1541.84	184800		10818200		2873100		5400800	9.31846e+06
U	DSQDAGGFGPEDR		675.781	2	1349.55	41603.1		4157200		857420		2609000	2.84815e+06
U	QRELAEQELEK	Gln->pyro-Glu	678.344	2	1354.67	84082.1		3285400		511060		1359600	1781385
U	QRELEQLGR	Gln->pyro-Glu	556.296	2	1110.58	42857.1		4.2118e+06		778280		1894400	2.204e+06
U	SLESLHGFVAAATK		477.593	3	1429.76			7743600		1785900	60307.1	5051300	8597077
U	LSFSGLR		390.224	2	778.434	79657		4752400		1106500		3205900	4408923
U	VLALPEPSPAAPTLR		766.446	2	1530.88	125260		8376600		1943400		4566700	9048462
U	LTVNEAVK		437.256	2	872.497			5.79e+06		1240900	38151.1	3580400	5.186e+06
U	ARNDESQLSPATR		482.243	3	1443.71	52519.1		3602800		531750		1670700	2453385
N	LLEAQLATGGLLDPVHSHR		507.531	4	2026.1	74058.1		8737800		1734100		4138700	6521077
U	VQSGSESVLQEYVDLR		904.955	2	1807.9	75245.1		5547800		1068600		1893200	5208000
U	TLQEEHVTVAQLREEAER		535.276	4	2137.08	32543.1		3.8832e+06		1120400		1.4516e+06	3.73662e+06
U	LTVDEAVR		451.751	2	901.487	204870				3519700	118800	11220000	12092462
U	LLDPEDVDVPQPDEK		854.917	2	1707.82	53251.1		3849000		859250		2150900	2.85769e+06
U	YLYGTGAVAGVYLPGSR		872.457	2	1742.9	98186.1		7153800		1292900		3.1142e+06	6450154
U	LSVYQAMK		470.252	2	938.49			7.7808e+06		760540	33453.1	3114200	3970000
U	EGVVGPELHHK		401.216	3	1200.62			2.966e+06		444380	20933.1	971870	1.878e+06
U	LTAEDLYEAR		590.796	2	1179.58			6.8006e+06		1452600	56881.1	4535500	4914769
U	LQNVQLALDYLR		723.409	2	1444.8			8072200		1125900	31426.1	2999600	6644923
U	QLAEAHAQAK	Gln->pyro-Glu	525.272	2	1048.53			6.2254e+06		1.0735e+06	30681.1	3.2107e+06	5609385
U	TLLQGSGCLAGLYLEDSKEK	Carbamidomethyl	728.04	3	2181.1	94005.1		10421400		2163900		6764000	1.10306e+07
U	AALAHSELATTQAASTK		557.628	3	1669.86	108310		12229800			79852.1	7802700	1.49226e+07
U	NLELHYQAFLR		468.586	3	1402.74	72230.1		7207800		1573600		1225000	6662154
U	RPELEDSTLR		405.882	3	1214.63			2.1128e+06		380080	44163.1	1800500	2.08554e+06
U	QRGGAEGELQALR	Gln->pyro-Glu	684.355	2	1366.7			2057600	50770.1	322860		722070	2.09752e+06
U	LLSLETYNLFR		684.88	2	1367.74			7444200	32026.1	1894500		4964100	8700769
U	ARQEEVYSELQAR		526.934	3	1577.78			9092800		1731900		4197100	5866615
U	FLEQEK		397.208	2	792.402			2.2518e+06		351480	11753.1	1582300
U	GYLDKETNR		548.275	2	1094.54			873560		145900		374480	778615
U	SLESLHGFVAAATK		715.885	2	1429.76			2.3942e+06		386650		1033600	2134923
U	CVEDPETGLR	Carbamidomethyl	588.272	2	1174.53	23168.1				402870		1651400	1830308
U	LLEAAAQSSK		509.282	2	1016.55			8.5114e+06		1243600		4666600	7521692
U	APVPASELLDAK		605.837	2	1209.66	81992.1		8574400		1650700		5045000
U	GLLSAEVAR		458.267	2	914.519			6331000		1379900		3769600	4223385
U	SLLDEELQR		551.791	2	1101.57			8.6676e+06		1132700		4738200	5549692
U	KGLVGPELHDR		407.563	3	1219.67			3203200		598880		1599100	2218000
U	GHVPLLAVCDYK	Carbamidomethyl	686.358	2	1370.7			1.96042e+06		278220		674500	1.26139e+06
U	DAPDGPSVEAEPEYTFEGLR		1089.99	2	2177.98			2.2158e+06		243120		674000	1.387e+06
U	QLAEGTAQQR		551.286	2	1100.56			1.6671e+06		161560		660070	810662
U	LQLEETDHQK		620.812	2	1239.61			1132320		133490		439020	989954
U	ASESELER		460.72	2	919.425			1136560		197830		655980	977538
U	STQGAEEVLK		531.277	2	1060.54			6972400		1182900		4714400	5770154
U	DGRHPQGEQMYR		491.893	3	1472.66			862500		113510		255240	686400
U	LLEAQLATGGLLDPEESHRLPVEVAYK		737.899	4	2947.57			7.051e+06		922090		1948300	5557692
U	GLVEDTLR		451.751	2	901.487			5377800		762090		2801100	2689231
U	VPLDVAYAR		502.282	2	1002.55			6414400		1250100		3490000	3483077
U	ALLEELER		486.772	2	971.529			8846400		1.5799e+06		4839000	6377692
U	FLEEEAEKMK		418.541	3	1252.6			1.54104e+06		445660		599940	1508862
U	VEVPVGSFK		481.271	2	960.528			7349600		1226400		4377800	5693231
U	AFCGFEDPR	Carbamidomethyl	549.737	2	1097.46			4.2282e+06		684050		2463500	3319692
U	LAALSEATR		466.264	2	930.513			7490600		1902300		4373300	7.74903e+06
U	LLDAQLSTGGLVDPSK		807.441	2	1612.87			5088400		1645200		3267200	5195077
U	LKELQNTGDR		391.879	3	1172.61			2.2834e+06		219430		927490	1.67185e+06
U	QRELAEQELEK		458.24	3	1371.7			865640		223080		428670	665800
U	RPELEDSTLR		608.32	2	1214.63			4268000		865510		1587700	2915231
U	LYVHEAVK		479.771	2	957.528			1.42358e+06		279320		541400	995292
U	VLYQSLEGAVQAGQLK		852.47	2	1702.93			3093800		585760		1215400	2879846
U	SKEQAELEAAR		616.317	2	1230.62			833100		111640		281110	750785
U	QLAEEDLAQQR		650.828	2	1299.64			2649200		372950		1453000	1765385
U	LKAEAELLQQQK		466.937	3	1397.79			7771800		1132900		4149300	5065077
U	QAEAELALR		500.775	2	999.535			2750600		495110		1490200	2.06123e+06
U	SFLSEKDSLLQR		474.924	3	1421.75			5329000		1517000		2667700	6011385
U	ALVQLKPR		462.803	2	923.592			1.18758e+06		146780		477690	847092
U	QVEVTVHK	Gln->pyro-Glu	461.753	2	921.492			2544800		380790		1786800	1.58785e+06
U	AQAELEAQELQR		693.355	2	1384.69			7138200		1243300		2735500	4873538
U	LMADFQAGR		504.75	2	1007.49			4433200		650930		3160700	3987385
U	RQELEAELAK		396.219	3	1185.64			1669280		430210		1216300	1519569
N	GFFDPNTHENLTYLQLLER		769.718	3	2306.13			42788000		6621300		15572000	46016923
U	LLEAQACTGGLLDPSTGERFPVTEAVNK	Carbamidomethyl	991.838	3	2972.49			3.5034e+06		874400		1495100	3621538
U	LVLTVVEEHER		441.914	3	1322.72			4982000		1276800		3253200	5951692
U	LLDAQLATGGLVDPR		769.93	2	1537.85	83866.1		5025400		1252100			3644923
U	LPVDVAYQR		530.793	2	1059.57			9776200		2311100		7275300	7121538
U	KQEELQHLEQQR		522.606	3	1564.8			4.3848e+06		468380		1.2684e+06	2614923
U	QLREEQQR	Gln->pyro-Glu	535.273	2	1068.53			3060600		464610		1089500	2176923
U	LDLQYAK		425.737	2	849.46			4453000		505740		1933300	1.89815e+06
U	QKVPAQQLQEAGLLSQEELQR		798.431	3	2392.27			1.64656e+06		308550		772180	737200
U	MGLVGPEFKDK		407.55	3	1219.63			1.6718e+06		648470		1073900	2132462
U	KVALEEVER		536.803	2	1071.59			586420		109670		299690	765785
U	QVQVALETAQR		621.844	2	1241.67			2528400		571020		1312300	1869846
U	ESADPLSAWLQDAKR		562.953	3	1685.84			1.68092e+06		479580		460840	1.48755e+06
U	ALVPAAELLDSGVLSHELYQQLQR		884.145	3	2649.41			4.8814e+07		6.9341e+06		8460700	41564615
U	GMHQSLEEFR	Oxidation	417.193	3	1248.56			2.519e+06		200460		725530	630477
U	SMVEEGTGLR	Oxidation	547.761	2	1093.51			1.65722e+06		137860		505090	370046
U	AQAEVEGLGK		501.267	2	1000.52			7209200		1351700		4423100	7093231
U	GWLYYEAGQR		621.799	2	1241.58			2837200		534130		1660300	2.69646e+06
U	VTLVQTLELQR		650.385	2	1298.76	100820		4923200		1279500		1892500
U	SYVDPSTDER		584.759	2	1167.5			4.19e+06		520670		2683400	2776000
U	RLTAEDLYEAR		446.233	3	1335.68			2.2708e+06		477690		819630	1.38183e+06
U	GTNVLAGVWLEEAGQK		836.439	2	1670.86			3.3454e+06		900280		1383400	2674923
U	AELELELGR		515.282	2	1028.55	62863.1		6.0314e+06		1271300		3297200
U	GHLSGLAK		391.73	2	781.445			2006600		120680		706610	1.09845e+06
U	LLEAQVATGGLLDPVHSHR		671.701	3	2012.08			2435200		523940		1173000	2.60692e+06
U	AQLEPVASPAK	Phospho	595.794	2	1189.57			2199800		354020		966730	1.04786e+06
U	LKAEVTEAAR		544.309	2	1086.6			1024120		199210		328990	655923
U	LSVYTALQR		525.801	2	1049.59			7420400		1642800		4882200	6842000
U	SQVEEELFSVR		661.833	2	1321.65			5901800		1306300		4.0558e+06	7649077
U	RQEQLQAVPLANCQAAR	Carbamidomethyl	651.674	3	1952			7322800		1174400		4524000	5302154
U	LKQSAEEQAQAQAQAQAAAEK		733.705	3	2198.09			6333200		1064400		2574000	4131846
U	QLEMSAEAER	Oxidation	590.269	2	1178.52			787460		43734.1		186670	120054
U	DLLQPEVAVALLEAQAGTGHLLDPATSAR		986.196	3	2955.57	189730		18052600		4269100		5890300
U	MQAVQEATR		517.258	2	1032.5			2266800		602710		2091100	2998615
U	VLYQSLEGAVQAGQLK		568.649	3	1702.93			2772400		876880		2591500	3828154
U	LKAGVGAPVTQVTLQSTQR		652.041	3	1953.1			993500		202560		326380	1.02895e+06
U	AQFDQLKDGK		575.299	2	1148.58			503520		91746.1		256840	526138
U	YSELTTLTSQYLK		773.904	2	1545.79			6.3412e+06		1.6826e+06		3767400	6960462
U	ELAEEAAR		444.725	2	887.435	71977.1		1.36684e+06		183920		717060
U	QLAEEDAAR		501.746	2	1001.48					216470	18876.1	889980	764185
U	SDQLTGLSLLPLSEK		800.943	2	1599.87			3.4528e+06		741070		2175500	3860462
U	LSVAAQEAAR		508.28	2	1014.55			8.1046e+06		2092700		5678100	7.214e+06
U	LQLEACETR	Carbamidomethyl	560.277	2	1118.54			6.3026e+06		1216800		4480000	5347538
U	DLDKADGMLR		378.525	3	1132.55			1.73588e+06		423210		1072300	1.43152e+06
U	QVQVALETAQR	Gln->pyro-Glu	613.33	2	1224.65			3.375e+06		794230		1902000	2.65077e+06
U	EALAELER		465.748	2	929.482			2681600		487620		2577500	2.42708e+06
U	LSYTQLLK		483.287	2	964.559			4254600		656520		3785200	3774308
U	HPQGEQMYR		573.261	2	1144.51			888460		113430		639080	461800
U	GDQCQLVGPAQPSHWK	Carbamidomethyl	603.29	3	1806.85			2.0828e+06		303810		1583600	1.22462e+06
U	LREALAELER		400.563	3	1198.67			678840		219520		557420	997369
U	AVTGYKDPYTGEQLSLFQAMK		783.059	3	2346.16			4.2728e+06		608570		3537000	6433385
U	LPPGYHPLDVEKEWGK		466.995	4	1863.95			1772440		282850		664100	1.00654e+06
U	SLLAWQSLSR		580.825	2	1159.63	36394.1				1078400		3438500	4718923
U	AQAEQAALK		465.256	2	928.498			1.05346e+06		162110		833370	755646
N	LLSDPSDDTK		545.767	2	1089.52			3.4608e+06		599510		2678800	2678923
U	KGWLYYEAGQR		457.567	3	1369.68			1.52994e+06		198100		636610	1.35172e+06
U	HYQQLLQSLEQGEQEESR		734.686	3	2201.03			3308400		833680		3196300	5420615
U	DPYSGQSVSLFQALKK		589.981	3	1766.92			2.8054e+06		612050		3072200	5208769
U	HGERDVEVER		409.202	3	1224.58			3920000		249200		759150	1506538
U	AQAEAQQPVFNTLR		786.91	2	1571.81			2.0272e+06		345030		722790	940385
U	RLTVNEAVK		515.306	2	1028.6	33863.1				514580		1215300	2128000
U	LEAQHQALVTLWHQLHVDMK		480.256	5	2396.24			2702800		364630		452620	2983692
U	LRAETEQGEQQR		482.243	3	1443.71			2824600		359960		1348200	1584308
U	ELSEVGSVR		488.259	2	974.503			6.6714e+06		1771400		5130000	6744769
U	SSSVGSSSSYPLSSAGPR		856.908	2	1711.8			2545600		997670		2501500	4532769
U	SLAQADAEK		466.738	2	931.461			1.2335e+06		121340		952900	1164000
U	QLEMSAEAER		582.272	2	1162.53			1319220		204340		1155400	1023077
U	GMHQSLEEFR		411.861	3	1232.56			3.527e+06		777740		2424100	2.58954e+06
U	QQNLASYDYVR		678.831	2	1355.65			2.4396e+06		387620		1504400	1545385
U	RAQAEQAALK		543.307	2	1084.6			1685620		236180		472840	592846
U	AVTGYKDPYSGNTLSLFQAMK		764.384	3	2290.13			2.3232e+06		545380		1612500	4128000
U	QKAQVEQELTTLR	Gln->pyro-Glu	763.912	2	1525.81			1.2001e+06		267610		360000	824769
U	GYYSPYSVSGSGSTAGSR		891.9	2	1781.79			1.88748e+06		334610		1.5398e+06	2.37985e+06
U	AAEEAEEAREQAER		530.245	3	1587.71	52912.1				613720		1596700	3384769
U	LQHEATAATQK		399.879	3	1196.61			1738300		185500		995650	735123
U	LVNLRNDDLADGNPK		551.957	3	1652.85			1.21092e+06		460610		298550	850677
U	FLEGTSCLAGVFVDATK	Carbamidomethyl	907.953	2	1813.89			3.7514e+06		1050500		1030200	2234000
U	VYHDPSTQEPVTYSQLQQR		759.37	3	2275.09			7.1954e+06		1567700		7696700	10789231
U	AEMEVLLASK		545.794	2	1089.57			1902980		498620		1992000	1947385
U	LAQGHTTVAELTQREDVYR		547.534	4	2186.11			2847200		1280000		661110	3166769
U	MGLVGPEFK		489.26	2	976.505			2240800		436360		2438900	1339138
U	NDDLADGNPK		529.741	2	1057.47			1.03862e+06		120690		889350	641092
U	VPAQQLQEAGLLSQEELQR		713.046	3	2136.12			1.83654e+06		394440		1478500	1.74692e+06
U	LLLEAQAATGFLLDPVKGER		714.404	3	2140.19	282600		1.35106e+07		4081800		352330	5393846
U	LRDVSAYSK		519.783	2	1037.55		30500.1	592080	126650		36317.1	35139.1	547862
U	EEELQQTLQQEQNMLDR		711.336	3	2130.99			2808600		498050		4305500	2875538
U	LECLQR	Carbamidomethyl	409.713	2	817.412	48384.1				826220		2674600
U	QLLEEELAR		550.801	2	1099.59					586180		1711700	1.67462e+06
U	QSSEAELQAK		545.772	2	1089.53					100230		568820	553215
U	SWSLVTFR		498.269	2	994.524	39401.1				1061100		3088100
U	ENTAYFQFFSDVR		812.375	2	1622.74			2.3618e+06		380780		451900
U	MVEGYQGLR	Oxidation	534.761	2	1067.51			2963600		276750			689169
U	LAEDEAFQR		539.762	2	1077.51			8.4016e+06		1339700		6528500
U	QLQLAQEAAQK	Gln->pyro-Glu	605.825	2	1209.64			2815600		453800		1572400
U	MVEGYQGLR		526.763	2	1051.51					809400		2345600	3753538
U	YLTCPK	Carbamidomethyl	391.199	2	780.384			2.2616e+06		345300		1143900
U	TLQEEHVTVAQLR		762.412	2	1522.81					80084.1		442570	695985
U	QVEVTVHKGDQCQLVGPAQPSHWK	Carbamidomethyl+Gln->pyro-Glu	678.589	4	2710.33					343910		913010	1.31282e+06
U	SFLSEKDSLLQR		711.883	2	1421.75					250140		379610	1122185
U	YLYGTGAVAGVYLPGSR		581.974	3	1742.9					485040		1689400	1.60031e+06
U	QLAEGTAQQR	Gln->pyro-Glu	542.773	2	1083.53	23452.1				409210			1664000
U	KGQLCFEGLR	Carbamidomethyl	403.213	3	1206.62			3147600		546220		1918500
U	LLLWSQR		458.274	2	914.534			5695800		735440		3196800
U	QTNLENLDQAFSVAER		612.302	3	1833.89					336920		1451600	1.37139e+06
U	ELAEQELEK		544.777	2	1087.54					450530		2439900	2400000
U	EVLEMESAWR		625.298	2	1248.58					764570		3012200	2962308
U	TEYNLR		398.203	2	794.392			2.739e+06		751730			2.44892e+06
U	SKEQAELEAAR		411.214	3	1230.62			6.078e+06		705940		1934000
U	EAQAVPATLQELEATK		849.949	2	1697.88			3756200		638050		2074300
U	QAEAELALR	Gln->pyro-Glu	492.261	2	982.508			2.1504e+06		408470		1237800
U	QLTVEELVR	Gln->pyro-Glu	535.298	2	1068.58			1.60426e+06		251170		835490
U	AGVGAPVTQVTLQSTQR		571.648	3	1711.92			2.2162e+06		453440			1.80692e+06
U	QLLSPGTALLLLEAQAASGFLLDPVR	Gln->pyro-Glu	892.837	3	2675.49			3929400		774230			3745231
U	LQLEETDHQK		414.21	3	1239.61			8519000		1287500		4980100
U	FLEEEAEK		497.74	2	993.465			4.267e+06		601730		2484900
U	SKVLYQSLEGAVQAGQLK		640.358	3	1918.05					516920		613320	2516462
U	VQSGSESVLQEYVDLR		603.639	3	1807.9					256580		1222200	1745385
U	QSSEAELQAK	Gln->pyro-Glu	537.259	2	1072.5			1.12456e+06		223460		621010
U	QYDLDDALTK		591.288	2	1180.56			2.3188e+06		298730		1182900
U	CDNFTTSWR	Carbamidomethyl	593.751	2	1185.49			874860		148850		634630
U	DPYSGQSVSLFQALK		820.42	2	1638.83			1.93008e+06		272140		1387600
U	SLAAEEEAAR		523.759	2	1045.5			8.9932e+06		1602800		4595900
U	QLAAEEEQR		537.265	2	1072.51			1991840		209100		834800
U	AGVVGPELHEK		568.309	2	1134.6			740560		90555.1			579000
U	FRELAEEAAR		397.875	3	1190.6			4827600		929150		2027300
U	FPVTEAVNK		502.774	2	1003.53			2.0676e+06				1424700	1.14106e+06
U	DYELQLLTYK		643.337	2	1284.66			1.31998e+06				919240	746477
U	HKPMLLDMNK		409.551	3	1225.63					411870		1817100	1750923
U	LLEAQLATGGLLDPEESHR		683.692	3	2048.05					582390		2378200	2.28277e+06
U	KQLTVEELVR		405.575	3	1213.7			2239400		438430		1459300
U	QYLNALKDYELQLLTYK		706.049	3	2115.13			1.3e+06		325400		652210
U	AKLEQLFQDEVAK		759.912	2	1517.81					250680		871570	1.29383e+06
U	QLQLAQEAAQKR	Gln->pyro-Glu	683.875	2	1365.74					566880		1054400	2169538
N	GYFDEEMNR	Oxidation	588.735	2	1175.46			4267000		286780		1456700
U	QLAAEEEQR	Gln->pyro-Glu	528.751	2	1055.49			1939300				1242100	1191954
U	QQNLASYDYVR	Gln->pyro-Glu	670.317	2	1338.62			2.8864e+06		551070		1806500
U	DLDKADGMLR	Oxidation	383.857	3	1148.55			883560		72957.1		219940
U	LSLYEALK		468.774	2	935.533					171020		549430	1.14809e+06
U	LEAQHQALVTLWHQLHVDMK		600.068	4	2396.24					265890		333800	2211077
U	LQNVQLALDYLR		482.609	3	1444.8					236520		1212900	1731385
U	REEAAVDAQQQK		458.232	3	1371.67			658200				442440	372369
U	NDESQLSPATR		609.291	2	1216.57					186360		990790	837600
U	VVLVDPETGKEMSVYEAYR		729.033	3	2184.08			2884400		651560			3.68585e+06
U	QKVPAQQLQEAGLLSQEELQR	Gln->pyro-Glu	792.755	3	2375.24					373360		1015200	1.68523e+06
U	SSLAGLLLKPTNEK		735.93	2	1469.85					394700		1199900	2011692
U	LKAEAELLQQQK		699.901	2	1397.79					454520		600610	1.07428e+06
U	LHVALLER		475.793	2	949.571					426310		859380	1.68508e+06
U	QVEEELMALK	Gln->pyro-Glu	586.797	2	1171.58			1.35762e+06		210860		911320
U	AVTGYRDPYTEQTLSLFQAMK		807.07	3	2418.19					663690		2100400	3990308
U	KQLTVEELVR		607.859	2	1213.7					100210		258180	475108
U	SLQEELQHLR		626.836	2	1251.66					253230		983530	1.12228e+06
U	SLSALYLEK		512.29	2	1022.56					1.4106e+06		5497500	6.34523e+06
U	QTLTLYQALKK	Gln->pyro-Glu	645.377	2	1288.74					845490		2079800	3593077
U	QTLTLYQALKK		436.262	3	1305.77					344380		955190	1.20148e+06
U	LLDAQLATGGLVDPR		513.623	3	1537.85					502590		1486300	1.90646e+06
U	QLQLAQEAAQK		614.338	2	1226.66					325610		973090	963200
U	GMHQSLEEFR		617.288	2	1232.56					87114.1		328180	328108
U	NLELHYQAFLR		702.375	2	1402.74					300060		303130	1.10095e+06
U	AHAFVVQQREEELQQTLQQEQNMLDR		792.893	4	3167.54					294500		267290	2633846
N	LLEAQLATGGLLDPVHSHR		676.373	3	2026.1					506570		1144300	2.55646e+06
U	YLQDLLAWVEENQR		592.969	3	1775.88			21746000		5713200		7036500
U	EEELQQTLQQEQNMLDR		1066.5	2	2130.99			1.0834e+06				448900	944031
U	QTLTLYQALK		589.843	2	1177.67					213110		685780	723077
U	LLSLFQAMK		525.804	2	1049.59			3468200		852920		3266100
U	LAQGHTTVAELTQR		762.91	2	1523.81					112560		428380	629877
U	GFFDPNTEENLTYLQLMER		773.032	3	2316.07					1.3718e+06		7641100	1.13522e+07
U	DTHDQLSEPSEVR		504.902	3	1511.69			5.4714e+06		703470		4001200
U	ARQEEVYSELQAR		789.897	2	1577.78					166010		347560	796646
U	QLAEEDLAQQR	Gln->pyro-Glu	642.315	2	1282.62					654930		2281700	2550154
U	FLEVQYLTGGLLEPDTPGR		1053.05	2	2104.08			9.8724e+06		1477300		1464200
U	LSVYQAMK	Oxidation	478.249	2	954.484			2.1856e+06		156670		427770
U	QLEMSAEAER	Gln->pyro-Glu	573.758	2	1145.5			1.49692e+06		213110		839510
U	GTNVLAGVWLEEAGQK		557.962	3	1670.86					374590		1135800	1742462
U	LEDLLQDAQDEKEQLNEYK		774.376	3	2320.11			12643000				9888100	10613231
U	LEQLFQDEVAK		660.346	2	1318.68					448480		1824400	1.98877e+06
U	SHRVPLDVAYAR		461.921	3	1382.74					532860		362620	1.57939e+06
U	HPQGEQMYR		382.51	3	1144.51			219180				261560	256523
U	SQVMDEATALQLQEGLTSLEEVTK		874.106	3	2619.29			7.6296e+06				13939000	1.48577e+07
U	DGHNLLSLLEVLSGDSLPR		679.032	3	2034.07					1550400		541110	4.36385e+06
U	AQFDQLK		425.227	2	848.439			498880		364690			912369
U	LQEDKEQMAQQLVEETQGFQR		845.743	3	2534.21			1.79684e+06				1661500	2770308
U	SEEMQTVQQEQLLQETQALQK		830.411	3	2488.21			2.7414e+06				3.297e+06	5280769
U	YSELTTLTSQYLK		516.271	3	1545.79			430240		146630		758600
U	VQMEELGK	Oxidation	475.237	2	948.459					36616.1		192260
U	ESYSALMR		478.729	2	955.443			1517360				1337200
U	LAEVEAALEK		536.798	2	1071.58					1838100		5.9192e+06
U	LQHEATAATQK		599.315	2	1196.61			133584				97155
U	ELVLLLLQWLR		698.44	2	1394.86			2869600					2895231
U	AVTGYRDPYTEQTLSLFQAMK	Oxidation	812.402	3	2434.18			2630000		83084.1
U	QLLSPGTALLLLEAQAASGFLLDPVR		898.513	3	2692.52			2723800					3268308
U	DLLQQFR		460.253	2	918.492			4.4364e+06		914850
U	VTLYEAMR		491.755	2	981.495					793410		3270500
U	QLAEEDAAR	Gln->pyro-Glu	493.233	2	984.451			873140		256190
U	QRLEAEAGR	Gln->pyro-Glu	506.762	2	1011.51					361920			1874154
U	AHAFVVQQR		528.291	2	1054.57					167300		444180
U	LSLYEALKK		532.821	2	1063.63					210670		707160
U	GQLCFEGLR	Carbamidomethyl	540.269	2	1078.52					185930		810630
U	QLTVEELVR		543.811	2	1085.61					372280		1200000
U	QLLEEELAR	Gln->pyro-Glu	542.288	2	1082.56			2.2692e+06		552100
U	LKTEAELALK		558.337	2	1114.66							379920	744400
U	LSYTQLLKR		374.561	3	1120.66					237780		375730
U	QTLTLYQALK	Gln->pyro-Glu	581.329	2	1160.64					232490		648420
U	QVEEELMALK		595.31	2	1188.61					220310		894550
U	LAEDEAFQRR		412.211	3	1233.61			1.50476e+06				550450
U	HLSDLYEDLR		630.815	2	1259.61					211020		1264400
U	WQAVLAQTDVR		643.846	2	1285.68	4237200	8.067e+06	2.0104e+06	1.64644e+07	4004100	1.9693e+06	1831200
U	LVLTVVEEHER		662.367	2	1322.72					146240		304340
U	LRLQAEEVAQQK		471.6	3	1411.78					274290			788462
U	VLALPEPSPAAPTLR		511.3	3	1530.88			965740		240010
U	DDPSGQMLLLLSDAR		815.909	2	1629.8					1389700		2204000
U	LLDPEDVDVPQPDEK		570.281	3	1707.82					351120		1703800
U	SLLTYVSSLYDAMPR		572.627	3	1714.86			5.0874e+06		1372700
U	ETLEQAKVEVPVGSFK		587.652	3	1759.94					594250			1.684e+06
U	YLQDLLAWVEENQR		888.949	2	1775.88	112630		8.6118e+06
U	FLEGTSCLAGVFVDATK	Carbamidomethyl	605.638	3	1813.89					488900		1124700
U	QTNLENLDQAFSVAER	Gln->pyro-Glu	909.437	2	1816.86					1540700		1566200
U	GGELVYTDTEARDVFEK		643.646	3	1927.92			499220					1.81923e+06
U	LAQGHTTVAELTQREDVYR		729.71	3	2186.11							95035.1	659692
U	TVTLWELLNSEYFTAEQR		734.036	3	2199.08			1.58136e+07		2274100
U	LQMEAGLCEEQLNQADALLQSDLR	Carbamidomethyl	915.778	3	2744.31					2193200		433740
U	DLLQPEVAVALLEAQAGTGHLLDPATSAR		739.899	4	2955.57					2877400		7000900
U	MSAAQALK		410.223	2	818.432					255280		917970
U	ELAQEQAR		472.743	2	943.472							390580	273862
U	EAEEQLQK		487.743	2	973.472							690670	499123
U	AQQVEAAER		501.254	2	1000.49							326340	157538
U	RMQEEVAR		509.759	2	1017.5							406400	536308
U	VSLTEAMHR		522.269	2	1042.52					132750			612892
U	LLSLFQAMK	Oxidation	533.802	2	1065.59			2.7682e+06					442569
U	AEAELLQQQK		579.312	2	1156.61							316110	323200
U	FRELAEEAAR		596.309	2	1190.6			821660					779431
U	VTLVQTLELQR		433.926	3	1298.76							618320	646308
U	RQVEEELMALK		449.243	3	1344.71					101170		486850
U	LLSLETYNLFR		456.922	3	1367.74					42373.1		372320
U	LEDLLQDAQDEK		708.846	2	1415.68							480830	364262
U	ESADPLSAWLQDAK		765.875	2	1529.74							1588500	1972308
U	LGFHLPLEVAYQR		771.925	2	1541.84							400150	1.19917e+06
U	AQAEAQQPVFNTLR		524.942	3	1571.81							877650	488631
U	DDPSGQMLLLLSDAR		544.275	3	1629.8					428150		1035500
U	DPYSGQSVSLFQALK		547.282	3	1638.83							656090	662446
U	DPYSGNTLSLFQAMK		836.406	2	1670.8							1189100	1.51732e+06
U	EAQAVPATLQELEATK		566.968	3	1697.88					191430		1668200
U	SLLTYVSSLYDAMPR	Oxidation	577.959	3	1730.85			4.7184e+06				355220
U	QYLNALKDYELQLLTYK	Gln->pyro-Glu	1050.06	2	2098.1			8.8022e+06				1091300
U	GYYSPYSVSGSGSTAGSR		594.936	3	1781.79							830800	1.10172e+06
U	RDDPSGQMLLLLSDAR		596.309	3	1785.9							767750	1.20586e+06
U	QSAEEQAQAQAQAQAAAEK	Gln->pyro-Glu	647.636	3	1939.89							1032600	1.01448e+06
U	FLEVQYLTGGLLEPDTPGR		702.369	3	2104.08							5951600	8.826e+06
U	LLEAQACTGGLLDPSTGER	Carbamidomethyl	663.33	3	1986.97					76737.1		634610
U	GLFDEEMNELLTDPSDDTK		1084.98	2	2167.95					1.3461e+06		2911700
U	LEAQHQALVTLWHQLHVDMK	Oxidation	604.067	4	2412.24					102920		289520
U	SEEMQTVQQEQLLQETQALQK	Oxidation	835.743	3	2504.21					208260		623660
U	RLDSAEWGVDLPSVEAQLGSHR		606.308	4	2421.2							822630	2918154
U	RLDSAEWGVDLPSVEAQLGSHR		808.075	3	2421.2							353340	1.0798e+06
U	QQQQMEQEKQELMASMEEAR	Gln->pyro-Glu	812.359	3	2434.06							844780	1.568e+06
U	QQQQMEQEKQELMASMEEAR		818.035	3	2451.08							716250	921677
U	VLSGSSSEAAVPSVCFLVPPPNQEAQEAVAR	Carbamidomethyl	1066.2	3	3195.59							1133400	2.83262e+06
U	FLSETLR		433.243	2	864.471							1.8234e+06	2995692
U	TGHLTVEK		442.745	2	883.476			279080
U	MQAVQEATR	Oxidation	525.256	2	1048.5			297940
U	ALQALDELRLQAEEAER		652.345	3	1954.01					182880
U	AGTLSLTEFADMLSGNAGGFR		1058.01	2	2114.01					1746600
U	AGTLSLTEFADMLSGNAGGFR		705.677	3	2114.01							2820000
U	RASFAEK		404.719	2	807.424							99828
U	MQEEVAR		431.708	2	861.401							590510
U	TELATQEK		460.24	2	918.466							403940
U	QAQEEAER	Gln->pyro-Glu	472.209	2	942.404							136400
U	QVQDESQR	Gln->pyro-Glu	486.723	2	971.431							115320
U	TLKPEEQR		500.775	2	999.535							95251
U	VVLVDPETGK		528.8	2	1055.59							399470
U	QLAEAHAQAK		533.786	2	1065.56							106510
U	RAAEEAEEAR		377.851	3	1130.53							82971
U	RAAEEAEEAR		566.273	2	1130.53							51672
U	HPQGEQMYR	Oxidation	387.842	3	1160.5							29674
U	HPQGEQMYR	Oxidation	581.259	2	1160.5							41985
U	SQVEEELFSVR		441.558	3	1321.65							303250
U	AQAELEAQELQR		462.572	3	1384.69							1436800
U	DTHDQLSEPSEVR		756.85	2	1511.69							324920
U	SDQLTGLSLLPLSEK		534.298	3	1599.87							621360
U	DPYTEQTLSLFQAMK		591.291	3	1770.85							588960
U	QTNLENLDQAFSVAER	Gln->pyro-Glu	606.627	3	1816.86							907210
U	TLLQGSGCLAGLYLEDSK	Carbamidomethyl	962.988	2	1923.96							299330
U	TLLQGSGCLAGLYLEDSK	Carbamidomethyl	642.328	3	1923.96			3.0066e+06
U	QYLNALKDYELQLLTYK	Gln->pyro-Glu	700.373	3	2098.1							2513500
U	AGTLSLTEFADMLSGNAGGFR	Oxidation	711.009	3	2130.01							1020200
U	GLFDEEMNELLTDPSDDTK		723.656	3	2167.95							5547500
U	GFFDPNTEENLTYLQLMER	Oxidation	778.363	3	2332.07							456450
U	AVTGYKDPYTGEQLSLFQAMK	Oxidation	788.391	3	2362.15							670430
U	LQEDKEQMAQQLVEETQGFQR		634.559	4	2534.21							363540
U	SQVMDEATALQLQEGLTSLEEVTK	Oxidation	879.437	3	2635.29							2086200
U	LQMEAGLCEEQLNQADALLQSDLR	Carbamidomethyl+Oxidation	921.109	3	2760.31							455690
U	TQLASWSDPTEETGPVAGLLDTETLEK		963.473	3	2887.4							2969800
U	SMVEEGTGLR		539.763	2	1077.51								6543692
U	LKTEAELALK		372.561	3	1114.66	48085.1							3053846
U	HGEKVEECQK	Propionamide	419.868	3	1256.58								72734
U	NLVDNLTGQR		565.302	2	1128.59
U	HLSDLYEDLRDGHNLLSLLEVLSGDSLPR		819.927	4	3275.68								5161538
U	ELAEEDAAR	Glu->pyro-Glu	493.233	2	984.451					256190
U	VLSSSGSEAAVPSVCFLVPPPNQEAQEAVAR	Carbamidomethyl	1066.2	3	3195.59							1133400
	SPTN1_MOUSE|P16546	Spectrin alpha chain, non-erythrocytic 1
U	LLQEQHPEEELLK		535.954	3	1604.84	459500	178330	75398000	178570	6177800	349640	2321200	68026154
U	LSLLSEER		473.764	2	945.513	202730	103140	2.8558e+07	112210	2451500	152220	1236200	25964615
U	LSDDNTLGQEELQQR		582.615	3	1744.82	124780	34095.1	15556400	51431.1	1320900	114010	846470	14044462
U	SSEELESAFR		577.77	2	1153.53	205460	73927.1	21460000	78840.1	1902100	141310	1.0677e+06	29684615
U	ELPTAFDYVEFTR		794.388	2	1586.76	190980	113010	18787600	83181.1	1.8771e+06	169610	797300	25512308
U	DVTGAEALLER		587.309	2	1172.6	198510	62164.1	20782000	77706.1	1824700	86110.1	987810	22384615
U	LGESQTLQQFSR		697.357	2	1392.7	325840	105330	36920000	125430	3145800	215150	1431300	41603077
U	LVQYLR		396.242	2	790.47	114470	53199.1	12464600	62284.1	1515500	66569	379080	12064769
U	DLTGVQNLR		508.28	2	1014.55	193400	74126.1	30476000	80297.1	1908400	139200	1151000	23432308
U	DLAALEDKVK		551.311	2	1100.61	246870	90684.1	28086000	74074.1	2381600	110960	570670	19887692
U	VNEVSQFAAK		546.788	2	1091.56	183100	64668.1	21018000	61344	1713000		1065200	19343077
U	KFEEFQTDLAAHEER		617.295	3	1848.86	200820	93439.1	29952000		1575600	132450	856430	23426154
U	HQEHKGELDAHEDSFK		382.179	5	1905.86	85410.1	21293.1	1.84866e+07		737600	79208.1	341840	14370615
U	LDDSYR		384.68	2	767.345	60704.1		5822200	33339.1	641120	39538.1	244750	5574462
U	DLSSVQTLLTK		602.843	2	1203.67	187090	54930.1	30728000		2862000	153530	1356200	35710769
U	KLSDDNTLGQEELQQR		625.313	3	1872.92	105010	30554.1	12150000		874160	40666.1	388380	14128308
U	SLQQLAEER		537.283	2	1072.55	429310	203040	41216000		3436800	227570	1424400	32360000
U	LSDDNTLGQEELQQR		873.419	2	1744.82	177280	66976.1	18946600		1651200	78776.1	413990	15213538
U	EELYQNLTR		583.296	2	1164.58	74502.1	55185.1	11666800		550660	77737.1	454840	10040308
U	KHQALQAELAGHEPR		421.977	4	1683.88	109080	31665.1	14034800		744560	47610.1	220600	12290154
U	LAQFVEHWK		386.542	3	1156.6	189770	72849.1	31006000		2098800	150290	958160	25503077
U	MQHNLEQQLQAR		499.253	3	1494.74	191690	77364.1	30290000		3138400	160420	1161700	3.90692e+07
U	QFQDAGHFDAENLKK	Gln->pyro-Glu	577.609	3	1729.81	272970	131350	43160000	72092.1	3233900		1479600	44493846
U	SSLSSAQADFNQLAELDR		976.471	2	1950.93	143040	49913.1	20768000	118920	2297400		566080	22273846
U	QKLEDSYR	Gln->pyro-Glu	511.251	2	1020.49	97569.1	62068.1	12988600		1322300	145140	487900	19273846
U	LLEATELK		458.771	2	915.528	117690		20410000	45260.1	1435900	97750.1	671550	20107692
U	DADETKEWLEEK		498.232	3	1491.67	94369.1		16857800	26921.1	1249500	74172.1	699900	13913077
U	EELLTNWEQLR		715.867	2	1429.72	71773.1		5537800	50175.1	980950	74088.1	295660	8038769
U	FLADFR		384.706	2	767.397	114430		17298800	48429.1	1145800	85014.1	663630	10983846
U	HQALQAELAGHEPR		519.602	3	1555.79		36419.1	10038000	37348.1	1078900	60414.1	269460	8154769
U	ENLLEEQGSLALR		736.391	2	1470.77	226220	84385.1	15979000	88308.1	2162900		473120	19132308
U	DLAALGDKVNSLGETAQR		619.994	3	1856.96	223790	126710	31236000	142830	3435100	296540		44775385
U	DLAALGDK		401.719	2	801.423	2.01257e+06	2.47187e+06	3.6864e+06	1.2136e+06	2.78451e+06	3.7375e+06	1.56274e+06	4222615
U	EAFLNTEDKGDSLDSVEALLK		765.385	3	2293.13	410030		39368000	190070	4415200	271370	1989600	66847692
U	QQVLDR		379.711	2	757.408	485090	727630	1.69742e+06	403870	203540	1.08884e+06	658950
U	KVEDLFLTFAK		437.583	3	1309.73	138550		14648400		1421800	104220	545300	17326154
U	TKQDEVNAAWQR		482.576	3	1444.71	139740		13675800		1341300	92600.1	544110	16058462
U	ALNVQEEK		465.748	2	929.482	110930		24404000		1596200	101100	978830	22147692
U	LQQSHPLSASQLQVK		555.309	3	1662.91	159190		27672000		1677800	186830	1145200	24920000
U	EKEPLAASTNR		405.882	3	1214.63	81701.1	41519.1	10365000		675290	57805.1	357960
U	GKDLLGVQNLLK		649.396	2	1296.78	58232.1		6901400		586850	51990.1	129460	5614462
U	LTALDEFATK		554.798	2	1107.58	183810	79391.1	31568000	72438.1		157260		33495385
U	LFGAAEVQR		495.772	2	989.529	315710		34916840		2904200	216260	1.2076e+06	32175385
U	DLASVQALLR		543.319	2	1084.62	198650		22476000	86263.1	1937800		1226400	23155385
U	LQVASDENYKDPTNLQGK		674.004	3	2018.99	297200		42532000	148870	3601100		1894700	64421538
U	SADESGQALLAASHYASDEVR		726.342	3	2176	250550		30804000	102810	2447800		1416100	47818462
U	EANQQQQFNR		631.797	2	1261.58		45360.1	15296800		1040700	65505.1	527140	12119231
U	LDETGNLMLSEGHFASETLR		740.692	3	2219.05	131180		13038400		2.0829e+06	111200	874220	36507692
U	FNRDVDETLGWLK		531.607	3	1591.8	106030		6.2256e+06		1133100	75811.1	254840	13653538
U	KFDDFQK		464.232	2	926.45	239150	81552.1	3.0116e+07	69425.1	2095300	131600
U	RNEVLDR		451.246	2	900.478	32187.1		5242200		315350	22738.1	101690	4860769
U	LQQLFR		402.74	2	803.465	265520		24768000	110600	1597700		785870	19953846
U	QGQLDNQTR	Gln->pyro-Glu	521.749	2	1041.48	44127.1		2948200		312330	24130.1	134400	2966308
U	GKDLLGVQNLLK		433.266	3	1296.78	143350		19040400		1.484e+06	103330	431420	18784615
U	KQEALVAR		457.774	2	913.534	57601.1		8059800		507420	38266.1	166230	4487077
U	GLVSSDELAK		509.774	2	1017.53	177650		23138000		2073900	129200	1.1111e+06	13182462
U	NQALNTDNYGHDLASVQALQR		776.716	3	2327.13	208120		34276000		2223300	161580	1433000	45200000
U	HALLEADVAAHQDRLDGLTLQAR		629.086	4	2512.31	158490		16707000		1447690	109640	296550	18132308
U	KHEAFETDFTVHK		397.949	4	1587.77	82742.1		13891000		840250	83693.1	297840	15304923
U	HQAFEAELSANQSR		529.922	3	1586.74			23242000	77975.1	2706900	167070	824900	19780000
U	ADVVESWLGEKENSLK		601.976	3	1802.9	133020		17516600		1558300	65548.1	442830	24426154
U	TALLELWELRR		467.273	3	1398.8	238900		19897200		2760600	166980	880470	36758462
U	ALLNADELANDVAGAEALLDR		1077.56	2	2153.1	1.6787e+06	1.1275e+06	39550000		1622800	1.4894e+06		33683077
U	GNAMVEEGHFAAEDVK		568.595	3	1702.76		75346.1	24166000		2595400	143570	1166000	3.19185e+07
U	WTQLLANSATR		630.838	2	1259.66	72729.1	24294.1	9.9416e+06		1076800	89928.1		8743231
U	HQAFEAEVQANSGALVK		600.308	3	1797.9		60005.1	13416600		2303790	70500.1	540080	1.12008e+07
U	SQLLGSAHEVQR		442.237	3	1323.69		135650	4.3218e+07	152020	3171500	184980	1503800	39181538
U	LDLLDQER		501.267	2	1000.52	645240	168580	10222800			592069	83776	5245077
U	EAALTNEEVGADLEQVEVLQK		762.388	3	2284.14	1.0745e+07	1.1045e+07	31522000	2.6878e+06			1522900	34040000
U	KLLVSSEDYGR		422.894	3	1265.66	49733.1	23691.1	7.9078e+06		744680		282480	8886308
U	DVDELEAWLSEK		717.343	2	1432.67	197920		1.70806e+07		3062000	152810	523220	19303077
U	FQFFQR		436.724	2	871.434	216850		19213600		1986800	117270	831740
U	VLETAEDLQER		651.83	2	1301.65	177080	62259.1				142470	769580	27056923
U	SWVNEK		381.693	2	761.371	29294.1		5093600		376310	36704.1	189210
U	FLSDFR		392.703	2	783.391	52670.1		11256600		652740		449760	8639692
U	LLVSSEDYGR		569.791	2	1137.57	155540		22030000		1457200		765010	18275385
U	SQLLGSAHEVQR		662.852	2	1323.69	65232.1		8055800		647730		172990	6516308
U	TALLELWELRR		700.406	2	1398.8	49509.1		3695000		321240	21950.1		4650615
U	TATDEAYKDPSNLQGK		579.948	3	1736.82	260620		35352000	148510			1283600	37584615
U	LLEAQSHFR		550.796	2	1099.58	37275.1		4788200		250440		148500	3954308
U	QEFAQHANAFHQWLQETR	Gln->pyro-Glu	742.015	3	2223.02	99288.1		18883800		1.1537e+06		815580	2.44169e+07
U	ALSSEGKPYVTKEELYQNLTR		607.319	4	2425.25	264540	131220			3105900	190440		46558462
U	LDENSAFLQFNWK		806.394	2	1610.77	84167.1		10455000		889650		175930	11195846
U	EPLAASTNR		479.751	2	957.488	23816.1		1454920		117650		46027.1	1113092
U	ALCAEADR	Carbamidomethyl	453.211	2	904.407	38320.1		5303000		210590		233750	4773385
U	DLASVNNLLK		543.811	2	1085.61	44445.1		5871800		459160	36193.1		5113692
U	LLQSHPESAEDLKEK		431.727	4	1722.88	308030		46582000		2.9864e+06		999470	49444615
U	QWELLLEK		529.798	2	1057.58	37094.1		3413000		366470		167040	3.18877e+06
U	VNSLGETAQR		537.781	2	1073.55	51604.1		6730000		508970		299320	6428308
U	LLQNNHYAMEDVATRR		483.494	4	1929.95	115570		1.32374e+07		2037500		523460	26898462
U	LLVSSEDYGRDLTGVQNLR		712.375	3	2134.1	114930		2.9932e+06		643980		65733.1	6086000
U	DTEQVDNWMSK		676.793	2	1351.57	27212.1		5755400		661200		544340	10142615
U	RAQLADSFHLQQFFR		621.992	3	1862.95	104060		7702000		709540		54114.1	7220615
U	LDGLTLQAR		493.785	2	985.556	114390		7798000		1201300	64363.1		7064615
U	KHQLLEADLSAHEDR		441.227	4	1760.88	98024.1		9511200		877300		247810	9522308
U	LLQNNHYAMEDVATR		592.29	3	1773.85			8748000		626440	59718.1	755940	12930615
U	EALVTSEELGQDLEHVEVLQK		789.408	3	2365.2			8246000		661940	89443.1	364910	13110923
U	ALCAEADRLQQSHPLSASQLQVK	Carbamidomethyl	638.333	4	2549.3	222390		20950000		2756100		692110	38586154
U	AQLADSFHLQQFFR		854.434	2	1706.85	24962.1	175810	472860000	81363.1	4396300			2859077
U	AQLADSFHLQQFFR		569.958	3	1706.85	220530		27418000		2923900	176010	27724000	3.50777e+07
U	DAEELEKWLQEK		759.378	2	1516.74	51788.1		2614800		518460		50150.1	4.04862e+06
U	GVLDMGNSLLER		652.337	2	1302.66		79932.1	17617800		2482600		859240	29463077
U	ALLNADELANDVAGAEALLDR		718.706	3	2153.1			197636000		8919700	202750	1459600	124027692
U	EAALTNEEVGADLEQVEVLQK		1143.08	2	2284.14	287050		6782400		1.11175e+06	1.52831e+06		5309846
U	DAEELEKWLQEK		506.588	3	1516.74			3061400	47879.1	834830		104130	7086923
U	LAALADQWQFLVQK		815.951	2	1629.89			52370000	140040	5582000		440740	23658462
U	YEALKEPMVAR	Oxidation	441.564	3	1321.67	41949.1		8206600		325960	35933.1		1.50452e+06
U	EKEQLMASDDFGR		509.237	3	1524.69			8591600		886710		602330	13182154
U	KVEDLFLTFAK		655.871	2	1309.73			16420200		1265300		340800	13297385
U	AGTFQAFEQFGQQLLAHGHYASPELK		719.609	4	2874.41	1.0919e+06		159052000		10793000	967260
U	DLTSWVTEMK		605.295	2	1208.57			7950200		903150		671290	12092308
U	DVEDEETWLR		646.294	2	1290.57			19814800		1757700		877000	21158462
U	RLEAELAAHEPALQGVLDTGK		740.066	3	2217.18			2882600		196260		79887.1	3077385
U	YEALKEPMVAR		436.232	3	1305.67			19645200		1476100		734430	26286154
U	GNAMVEEGHFAAEDVK		852.388	2	1702.76			1.80038e+06		143210		65117.1	2.41415e+06
U	HQAFEAELHANADR		536.922	3	1607.74			40186000		3.3891e+06		974150	31629231
U	KLDPAQSASR		536.791	2	1071.57			6696200		397010		147660	5565077
U	KHEALMSDLSAYGSSLQALR		545.031	4	2176.09			10383400		1200200	74505.1	485260
U	DLLGVQNLLK		556.837	2	1111.66			4629600		477690		258680	5009538
U	REELLTNWEQLR		529.614	3	1585.82			23496000		1687300		780340	24466154
U	DQLLAAK		379.724	2	757.433			2354000		152760		150600	2.67482e+06
N	ADVVESWLGEK		616.811	2	1231.61			7068600		572920		525380	8089538
U	QFQDAGHFDAENLK	Gln->pyro-Glu	801.863	2	1601.71			9123800		741310		319060	8383692
U	NEVLDR		373.196	2	744.377			1981940		187910	25780.1		3.17691e+06
U	EANELQQWLTEK		744.87	2	1487.73			17808600		1.9411e+06		985840	27500000
U	DVDETLGWLK		588.301	2	1174.59	176040		15336800		1058300			14048615
U	DMDDEESWLK		634.261	2	1266.51			4.7694e+06		551070		281020	6276154
U	LSELNQK		416.232	2	830.45			12984200		768880	63783.1	684060
U	QWELLLEK	Gln->pyro-Glu	521.284	2	1040.55			14315800		1648600		1091000	14498923
U	NTTGVTEEALK		581.801	2	1161.59			8961800		658780		376330	1.14131e+07
U	TALLELWELR		622.356	2	1242.7			14056200		806320		606630	1.48672e+07
U	LLQSHPESAEDLKEK		575.3	3	1722.88			9639800		383540		214370	1.04262e+07
U	LLDVNHYAK		536.793	2	1071.57			5952200		252930		128370	3796923
U	LEAELAAHEPALQGVLDTGKK		548.3	4	2189.17			5594800		398180		233230	5.33092e+06
U	MQHNLEQQLQAR		748.375	2	1494.74			2.0442e+06		173290		85220.1	1908308
U	MNEVLSLWK		560.297	2	1118.58			10507800		1758000		713080	19678462
U	KLEDLGAAMEEALLLDNK		658.347	3	1972.02			39440000			292080	512800	29846154
U	LAALQAFADQLLAVDHYAK		686.705	3	2057.09			147122000		20563000		4313800	172523077
U	AKLDENSAFLQFNWK		604.309	3	1809.9			7.22e+06		929310		163590	8712308
U	REELLTNWEQLR		793.918	2	1585.82			3097600		151610		120350	2866462
U	KFEEFQTDLAAHEER		463.223	4	1848.86			9221800		483450		376560	6.92231e+06
U	LMVHTVATFNSLK		487.603	3	1459.79			13441200		2294000		597700	28812308
U	QETFDAGLQAFQQEGLANLTALKDQLLAAK	Gln->pyro-Glu	1072.56	3	3214.65	184360		80486000		1991600			59861538
U	DSDELKSWVNEK		483.9	3	1448.68			5.2732e+06		659310		138510	6634923
U	DLTNVQNLQK		586.817	2	1171.62			13929200		749840		556790	8104308
U	HEAFETDFTVHK		487.565	3	1459.67			3451400		227260		249920	1959077
U	SADESGQALLAASHYASDEVREK		609.292	4	2433.14	123420		8602400		1265900			1.88769e+07
U	LLQNNHYAMEDVATRR		644.323	3	1929.95			2370200		231550		91764.1	3.40923e+06
U	KNNHHEENLSSK		479.567	3	1435.68			718240		47407.1		25556	1484600
U	HQEHKGELDAHEDSFK		477.472	4	1905.86			8742600		313680		178490	5797692
U	RQDLEDSLQAQQYFADANEAESWMR		1001.12	3	3000.33			33192000		2552200		316010	25523077
U	HQLLEADLSAHEDR		545.269	3	1632.79			10042200		880200		474320	7223231
U	SSLSSAQADFNQLAELDR		651.317	3	1950.93			9944200		1110200		1066700	17823077
U	DMDDEESWLKEK		508.889	3	1523.64			4.4494e+06		709430		172660	7048154
U	LKDLNSQADSLMTSSAFDTSQVK		829.407	3	2485.2			7.7284e+06		695050		453750	12793692
U	GVLDMGNSLLER	Oxidation	660.335	2	1318.65			8418400		353280		168720	1.64769e+06
U	GNAMVEEGHFAAEDVK	Oxidation	573.926	3	1718.76			12608800		306730		183180	1.67585e+06
U	YTEHSTVGLAQQWDQLDQLGMR		859.411	3	2575.21			11407400		835860		650430	26849231
U	DLNSQADSLMTSSAFDTSQVK		749.014	3	2244.02			3.1824e+06		476240		302130	9741692
U	CNSLEELK	Carbamidomethyl	496.739	2	991.464			4.6405e+06		351360		184110	2.198e+06
U	QFQDAGHFDAENLK		540.586	3	1618.74			2.7258e+06		254510		159250	2714923
U	LEDSYR		391.688	2	781.361			1218740		89949.1		80882.1
U	DTEQVDNWMSK	Oxidation	684.79	2	1367.57			5293800		121830		79271.1
U	EKEPLAASTNR		608.32	2	1214.63			1508080		67343.1			1193923
U	DADETKEWLEEK		746.844	2	1491.67			3791000		153620			2996615
U	VLETAEDLQERR		486.923	3	1457.75	92540.1	71806.1	5.9062e+06		974850			9111231
U	DPTNLQGKLQK		414.566	3	1240.68	105360	101316		126110		84406.1	172090	3.51983e+07
U	DLMSWLNGLR		602.811	2	1203.61			17429800		1416300		1101200
U	QEENDKLR	Gln->pyro-Glu	507.746	2	1013.48					110510		78511.1	875169
U	LAQFVEHWK		579.309	2	1156.6	36903.1				394030			4096615
U	EKLDLLDQER		420.226	3	1257.66	73225.1			43561.1	691730			10308308
N	ELELQK		380.216	2	758.417		41473.1	8606200		817470
U	ALSSEGKPYVTK		427.235	3	1278.68					224930		165890	4.58108e+06
U	NVEDLELWLYEVEGHLASDDYGKDLTNVQNLQK		962.722	4	3846.86	471720	438040						67775385
U	LMVHTVATFNSLK	Oxidation	492.934	3	1475.78			12377600		346900			3131538
U	MQHNLEQQLQAR	Oxidation	504.584	3	1510.73		26430.1	1.49274e+07		445500	34856.1		3816000
U	MTLVASEDYGDTLAALQGLLK		1105.07	2	2208.13			21856000		1244700			36624615
U	TKQDEVNAAWQR		723.36	2	1444.71			2012000				98539.1	2159231
U	LGDSHDLQR		520.76	2	1039.5	27167.1		2366400		140330
U	KLLEATELK		522.819	2	1043.62			9780600		825390			8626154
U	QQNFNTGLK		525.272	2	1048.53			2056200		134020			1.42872e+06
U	QVEELYQSLLELGEK	Gln->pyro-Glu	880.951	2	1759.89			37672000		1155800			25835385
U	ENLLEEQGSLALR		491.263	3	1470.77			2736400		393900			4222769
U	DCEQAENWMAAR	Carbamidomethyl	740.801	2	1479.59			6766800		383840			5804615
U	LDENSAFLQFNWK		537.932	3	1610.77			3999800		280130			4857231
U	MMLDHCLELQLFHR	Carbamidomethyl	614.965	3	1841.87			2566600		192540			4720923
U	GRELPTAFDYVEFTR		600.969	3	1799.88	86625.1				777380			8395538
U	QGFVPAAYVK		540.298	2	1078.58			7927200		901280			6261538
U	LREANQQQQFNR		511.262	3	1530.77			5553800		601530		93124.1
U	QGFVPAAYVK	Gln->pyro-Glu	531.785	2	1061.55	59051.1		5.627e+06		587430
U	QEFAQHANAFHQWLQETR		561.02	4	2240.05			6383000		538090		217920
U	MMLDHCLELQLFHR	Carbamidomethyl	461.476	4	1841.87			4109600		360430			11933692
U	QEAFLLNEDLGDSLDSVEALLK	Gln->pyro-Glu	1201.6	2	2401.19			20050000		674330			24860000
U	QETFDAGLQAFQQEGLANLTALKDQLLAAK		808.927	4	3231.68			1.78336e+07		1224700			22118462
U	ALSSEGKPYVTKEELYQNLTR		809.424	3	2425.25					377360		104550	6186769
U	KHEALMSDLSAYGSSLQALR		726.372	3	2176.09					460630		341530	10769385
U	TYLLDGSCMVEESGTLESQLEATKR	Carbamidomethyl	939.781	3	2816.32			7571400		644260			11363385
U	YEALKEPMVAR		653.845	2	1305.67			2.156e+06		215640			3188769
U	HEALMSDLSAYGSSLQALR		683.674	3	2048					234790		155910	2963385
U	SKLGESQTLQQFSR		536.95	3	1607.83			5148200				224970	7216615
U	DSDELKSWVNEK		725.346	2	1448.68			2744600		271460			3040923
U	HQAFEAELSANQSR		794.379	2	1586.74			2038000		161980			1767385
U	EAGSVSLR		409.722	2	817.429			6776000	40229.1	867780
U	DLTGVQNLRK		381.888	3	1142.64					310590	16527.1		2463385
U	VNDVCTNGQDLLK	Carbamidomethyl	738.362	2	1474.71	52756.1		8.0362e+06		457420
U	DCEQAENWMAAR	Carbamidomethyl+Oxidation	748.798	2	1495.58			2639800		66770.1			702554
U	LLQEQHPEEELLK		803.428	2	1604.84			4749400		332400			3819077
U	DLNSQADSLMTSSAFDTSQVK	Oxidation	754.346	3	2260.02			3488800		123850		182720
U	LLQNNHYAMEDVATR	Oxidation	597.621	3	1789.84			6770600		128940			1.47377e+06
U	LEAELAAHEPALQGVLDTGK		688.032	3	2061.07					368240		170060	3789385
U	KHEAFETDFTVHK		530.263	3	1587.77			2.1318e+06		134520			2202923
U	KLLEAQSHFR		410.231	3	1227.67			6594000		524290			3977385
U	ALCAEADRLQQSHPLSASQLQVK	Carbamidomethyl	850.775	3	2549.3			3707400		419600			6527538
U	LSELNQKWEALK		486.937	3	1457.79	89849.1				919850			5656308
U	DLAALGDKVNSLGETAQR		929.487	2	1856.96			2.8596e+06		267040			3303077
U	EKLTVLSEER		401.891	3	1202.65			1217600		139430			1323846
U	MMLDHCLELQLFHR	Carbamidomethyl+Oxidation	465.474	4	1857.87			2829200		64318.1			1.11311e+06
U	GACAGSEDAVK	Carbamidomethyl	532.737	2	1063.46			253620				88109.1	754077
U	GLVSSDELAKDVTGAEALLER		725.05	3	2172.13			7.8442e+07				724280	54912308
U	KLLVSSEDYGR		633.838	2	1265.66			2.1334e+06				68414.1	1695538
U	EQADYCVSHMKPYVDGK	Carbamidomethyl	676.305	3	2025.89			2.3988e+06		175070			3328000
U	ASAFNSWFENAEEDLTDPVR		766.682	3	2297.02			1.02802e+07		841300			21818462
U	EALVTSEELGQDLEHVEVLQK		592.308	4	2365.2			761740				85414.1	1579846
U	LKGLALQR		449.795	2	897.576					175640			1.02769e+06
U	RQQVLDR		457.762	2	913.509			1538240					1096769
U	MNEVLSLWK	Oxidation	568.294	2	1134.57			4753400		376510
U	DLTSWVTEMK	Oxidation	613.292	2	1224.57			3202200		131820
U	DMDDEESWLK	Oxidation	642.258	2	1282.5			3589600		91431.1
U	EQLMASDDFGR	Oxidation	642.78	2	1283.55			2201200		59436.1
U	MQHNLEQQLQAR	Oxidation	756.373	2	1510.73			860000					353769
U	KHALLEADVAAHQDR		419.223	4	1672.86			2815800		387440
U	TATDEAYKDPSNLQGK		869.418	2	1736.82			1918900					2536000
U	QVEELYQSLLELGEKR	Gln->pyro-Glu	959.002	2	1915.99					759660			10870000
U	KHEALMSDLSAYGSSLQALR	Oxidation	549.03	4	2192.09			4554000		151230
U	LDETGNLMLSEGHFASETLR	Oxidation	746.023	3	2235.05			13009600		581040
U	QEAFLLNEDLGDSLDSVEALLK	Gln->pyro-Glu	801.404	3	2401.19			41386000		1491400
U	QEAFLLNEDLGDSLDSVEALLK		807.079	3	2418.22			27242000					19626154
U	LKDLNSQADSLMTSSAFDTSQVK	Oxidation	834.739	3	2501.2			4969200		230820
U	YTEHSTVGLAQQWDQLDQLGMR	Oxidation	864.743	3	2591.21			9892800					2343846
U	QQVAPMDDETGKELVLALYDYQEK	Oxidation	933.785	3	2798.33			4271600		107840
U	RQDLEDSLQAQQYFADANEAESWMR	Oxidation	1006.45	3	3016.33			10534000					2701385
U	QETFDAGLQAFQQEGLANLTALKDQLLAAK	Gln->pyro-Glu	804.67	4	3214.65			8105800		256700
U	QDEVNAAWQR	Gln->pyro-Glu	600.276	2	1198.54			2.8228e+06		228750
U	LMVHTVATFNSLK		730.9	2	1459.79					189690			2674769
U	LAALADQWQFLVQK		544.303	3	1629.89					712950			7343231
U	LQQSHPLSASQLQVK		832.46	2	1662.91					68480			1.16383e+06
U	RAQLADSFHLQQFFR		466.746	4	1862.95					250310			2707385
U	TDDYGRDLSSVQTLLTK		637.993	3	1910.96					441620			3830462
U	SLSAQEEKLTALDEFATK		661.009	3	1980.01					687440			3.57477e+06
U	NTTGVTEEALKEFSMMFK		688.332	3	2061.97			1.39488e+07					3.69923e+07
U	QETFDAGLQAFQQEGLANLTALKDQLLAAK		1078.23	3	3231.68					1835000			33464615
U	SLGYDLPMVEEGEPDPEFEALLDTVDPNR		1083.17	3	3246.49			8.9648e+06		921920
U	CNSLEELK	Propionamide	503.747	2	1005.48			2.5378e+06	38092.1	107850
U	NNHHEENLSSK		436.869	3	1307.59							44032	884092
U	EQLMASDDFGR		634.782	2	1267.55							221110	3446154
U	VLETAEDLQER		434.889	3	1301.65					126000			1793231
U	LLQSHPESAEDLKEK		862.447	2	1722.88			1.3735e+06					1193138
U	KFMLFR		421.241	2	840.468			1303580
U	GELDAHEDSFK		624.281	2	1246.55			1315380
U	KGDLLTLLNSTNK		472.94	3	1415.8						23216.1
U	CTELNQAWTSLGK	Carbamidomethyl	754.364	2	1506.71					372190
U	HQEHKGELDAHEDSFK		636.294	3	1905.86			1030800
U	FLSDFRDLMSWLNGLR		657.337	3	1968.99								30244615
U	KLEDLGAAMEEALLLDNK	Oxidation	663.678	3	1988.01			4489200
U	MTLVASEDYGDTLAALQGLLK		737.052	3	2208.13			41462000
U	LEESLEYQQFVANVEEEEAWLNEK		976.126	3	2925.36					5.4411e+06
U	QQNFNTGLK	Gln->pyro-Glu	516.759	2	1031.5					172760
U	QDEVNAAWQR		608.789	2	1215.56					151110
U	EKLDLLDQER		629.835	2	1257.66								3902615
U	RWTQLLANSATR		472.928	3	1415.76					150500
U	TYLLDGSCMVEESGTLESQLEATK	Carbamidomethyl	887.747	3	2660.22			9.3552e+06
U	KHEGFER		451.728	2	901.441								209462
U	GACAGSEDAVK	Propionamide	539.745	2	1077.48								520138
U	KNNHHEENLSSK		718.847	2	1435.68								81429
U	ELVLALYDYQEK		742.388	2	1482.76								1886462
U	DCEQAENWMAAR	Propionamide	747.809	2	1493.6								1478615
U	HQLLEADLSAHEDRLK		469.498	4	1873.96								8507077
U	EAFLNTEDKGDSLDSVEALLK		1147.57	2	2293.13								1698769
U	VASNPYTWFTMEALEETWR		1166.04	2	2330.07								12763538
U	VASNPYTWFTMEALEETWR		777.697	3	2330.07								33738462
U	KASAFNSWFENAEEDLTDPVR		809.38	3	2425.12			4.5224e+06
U	QQVAPMDDETGKELVLALYDYQEK		928.453	3	2782.34								15377077
U	TYLLDGSCMVEESGTLESQLEATKR	Carbamidomethyl	705.087	4	2816.32								2028000
U	EWLEEKNQALNTDNYGHDLASVQALQR		786.385	4	3141.51					108810
U	VAEDLESEGLMAEEVQAVQQQEVYGAMPR		802.38	4	3205.49								22740000
U	MTLVASEDYGDTLAALQGLLK	Oxidation	742.384	3	2224.13
U	NVEDLELWLYEVEGHLASDDYGK		898.757	3	2693.25
U	QEAFLLNEDLGDSLDSVEALLKK	Gln->pyro-Glu	633.329	4	2529.28
U	FLADFRDLTSWVTEMK		653.661	3	1957.96
U	LEESLEYQQFVANVEEEEAWLNEK		732.346	4	2925.36
	DYHC1_MOUSE|Q9JHU4	Cytoplasmic dynein 1 heavy chain 1
U	TAEVLANK		423.24	2	844.465	143890	89210.1	3634000	95914.1	198040	181130	443170	7368308
U	TLLNELVK		465.287	2	928.559	57699.1		6255200	21927.1	282400	33784.1	633110	14345846
U	LVEALSR		394.237	2	786.46	29288.1		5007600		177230	31924.1	549800	10398923
U	LQGEFQLR		495.772	2	989.529	35687.1	28135.1	8554000		233740		784440	15483077
U	LLNTFLER		503.29	2	1004.57	45644.1	24373.1	7480200		207220		767230	16850769
U	TVENLKDPLFR		444.582	3	1330.72	44217.1		11163600		266300	50689.1	1085200	19338462
U	LQGLTVEQAEAVVR		756.923	2	1511.83	60365.1		9.244e+06		347590	47020.1	802270	23413846
U	VTFVNFTVTR		592.327	2	1182.64			6073800		274870	35531.1	563580	15249077
U	TEYLSNADER		599.273	2	1196.53			4504400		175990	25593.1	636750	12692000
U	TSFLDDAFRK		400.54	3	1198.6			3309400		152040	36692.1	445880	9281846
U	GWENHVEGQK		395.188	3	1182.54			2873800		63262.1	14838.1	331580	6.79446e+06
U	TLMAQSLYGGR		598.808	2	1195.6			4124600		135890	28779.1	544110	9557692
U	RVEDVLGK		458.267	2	914.519			4998000		115810	52159.1	345410	9.83585e+06
U	LFVFEPPPGVK		615.35	2	1228.69		21331.1	4.7214e+06		163100	33661.1	496390	9495846
U	VPVNLLR		405.763	2	809.512	26120.1		4759800		176950		437470	7599846
U	VPQLEVETHK		393.884	3	1178.63	42705.1		6714200		326100		800950	15118000
U	YATLATVSR		491.272	2	980.529			5420800	496230	150610	6.7608e+06	635530	14554615
U	LFTLESAR		468.761	2	935.508			7.6814e+06	30754.1	257980		773520	19407692
U	SVLVSAGNVK		487.287	2	972.56			4396600		87239.1		507910	10441077
U	SNSLAFLK		440.25	2	878.486			4137200		113770		388900	7.51231e+06
U	YAPLGWSK		461.245	2	920.476			2970200		95586.1		332310	6144308
U	VMSQELQEQLHK		490.585	3	1468.73			6030600		130410		614220	1.24718e+07
U	QHLVEVR	Gln->pyro-Glu	432.24	2	862.466			2927400		73781.1		332200	7.69631e+06
U	SSLQSQCLNEVLK	Carbamidomethyl	753.385	2	1504.76			5017800		126820		540300	13088769
U	HLLPVETQR		546.812	2	1091.61	36744.1				229020	48460.1	503060	9201692
U	LAETVFNFQEK		663.34	2	1324.67	54235.1				162973		477110	8834923
U	DLSSQLLK		452.261	2	902.507			4374600		106570		520210	9809538
U	VLRPQVTAVAQQNQGEAPEPQDMK		878.782	3	2633.32			6723000		220430		814320	13379077
U	AVDDLNLHSYSNLPLWVNK		733.38	3	2197.12			7071800		150350		927270	19595385
U	LLLLQAFRPDR		447.938	3	1340.79	56756.1		5.0408e+06		189160		588800	13812462
U	FYFDPK		408.7	2	815.385			3297600		90309.1		262230	5703385
U	SLLQALNEVK		557.827	2	1113.64			7917600		282580		575290	15760000
U	RAPVLDADKPVSSQLR		584.664	3	1750.97			4616200		182480		328170	9403231
U	APVLDADKPVSSQLR		532.63	3	1594.87			4921600		218630		634410	12225231
U	MVVLSLPR		457.778	2	913.542			2295200		112130		436900	6345846
U	EVDGLDVSK		481.245	2	960.476			2093200		54173.1		283910	4.25154e+06
U	LCDEQLSSQSHYDFGLR	Carbamidomethyl	685.646	3	2053.92			4431400		180210		493450	15045538
U	LFLTMELNPK		603.334	2	1204.65			2.8082e+06		143000		322550	9049385
U	GWDDLFNK		497.735	2	993.456			3419000		81910.1		403700	7262923
U	VQVALEELQDLK		692.888	2	1383.76			7762000		190430		764910	12861231
U	TFDHYCEYR	Carbamidomethyl	430.845	3	1289.51			1.85236e+06		50310.1		243320	3073538
U	NVAQYNANHPDFPMQLEQLER		838.733	3	2513.18			5172800		179250		848810	16036923
U	LKGTVGEPTYDAEFQHFLR		552.783	4	2207.1			2.4562e+06		71027.1		125050	5980308
U	KLVPLLLEDGGDAPAALEAALEEK		821.451	3	2461.33			3.0194e+07		480510		1.0034e+06	78109231
U	TPVSLTEHPK		370.205	3	1107.59	24804.1		5207200		194000			15250308
U	FNYGFEYLGVQDK		790.375	2	1578.74			4214400		134660		366830	12441231
U	SLETCMYDHK	Carbamidomethyl	428.518	3	1282.53			1.87012e+06		55717.1		204990	3235385
U	FLSDPQVHTVLVER		547.298	3	1638.87					222510	29340.1	766310	16673846
U	SELEEQQMHLNVGLR		594.965	3	1781.87			747240		81229.1	45693.1	323290	3964000
U	LYQEMFAWK		608.297	2	1214.58			1.23166e+06		68186.1		227420	5133231
U	AKEALELTDTGLLSGSEER		673.68	3	2018.02			3.4476e+06		212570		312650	13502923
U	LQFVGACNPPTDPGR	Carbamidomethyl	814.896	2	1627.78			2555600		69487.1		259500	4007385
U	QMVEHGGFYR	Gln->pyro-Glu	603.772	2	1205.53			2.8494e+06		103090		446730	6469077
U	TSDQTWVK		482.74	2	963.466			2411000		84397.1		513230	6087077
U	ASVVTLPVYLNFTR		790.446	2	1578.88			8.2848e+06		529300		396610	14695385
U	SPLVMDVLNLQGVQR		556.975	3	1667.9			1.97936e+06		48617.1		268610	3820000
U	QPQGHLLLLGVSGAGK	Gln->pyro-Glu	779.441	2	1556.87			3.2132e+06			31316.1	352780	10273538
U	HYLDFLNHYANLFHEK		516.005	4	2059.99	38156.1		8667800		77555.1			12852923
U	LMHVAYEEFEK		465.892	3	1394.65			3.5836e+06		66531.1		242230	4904615
U	TKPVTGNLRPEEALQALTLYEGK		632.848	4	2527.36			7.0638e+06				718350	20386154
U	TKPVTGNLRPEEALQALTLYEGK		843.462	3	2527.36			1.90852e+06				137760	5623846
U	EYQTQLLQR		589.812	2	1177.61					230100		610440	13299846
U	VAAPDVVVPTLDTVR		517.963	3	1550.87			2.1002e+06				311540	4806615
U	LDMELER		453.223	2	904.432			2349800				390320	4741385
U	QALVALFTHLR	Gln->pyro-Glu	626.364	2	1250.71			17872400				1200700	38201538
U	LLTLPNGER		506.793	2	1011.57			2.4032e+06				414070	5094923
U	DLPPVSGSLLWAK		691.888	2	1381.76			1.58622e+06				150660	3531231
U	YKEEYAVLLSEAQALK		619	3	1853.98					252320		537880	17126154
U	NVHLAPGWLMQLEK		545.961	3	1634.86					187070		364880	10335231
U	SRQELEQHSVDTASTSDAVTFLTYVQSLK		810.906	4	3239.59			9.2326e+06				264750	22027692
U	QVELYR		404.222	2	806.429			1.26158e+06				114100	2902615
U	QLQNLSQAAASGGAK		722.381	2	1442.75			1691160				212730	3443077
U	TSFLDDAFRK		600.306	2	1198.6			1.03154e+06				172680	3053692
U	QNLSPDKLPWSALK	Gln->pyro-Glu	790.428	2	1578.84			1.7225e+06				191920	5308923
U	GLFEALRPLETLPVEGLLR		708.412	3	2122.21			23426000		858430			67044615
U	HFPNLDKEK		376.533	3	1126.58			1720260				114800	2449538
U	KLHSLQPHACFR	Carbamidomethyl	374.2	4	1492.77			2839400				142980	4053692
U	AELGEYLR		475.751	2	949.487			5013800				657950	8496308
U	SLPLDEGEDEAQR		729.839	2	1457.66			2.9252e+06				250490	5046769
U	VNFLPELLTLSK		687.406	2	1372.8			14474000				1.0917e+06	25533846
U	TSAPLTCELLNK	Carbamidomethyl	673.853	2	1345.69			4085600				533570	12600615
U	VLRPQVTAVAQQNQGEAPEPQDMK		659.338	4	2633.32			2.168e+06				361940	6547231
U	GTVGEPTYDAEFQHFLR		656.315	3	1965.92			7915200				1.1326e+06	2.15846e+07
U	VDNEFDQR		511.73	2	1021.45			4637800		140390			7717385
U	EDLDKVEPAVLEAQNAVK		656.681	3	1967.02			3101200				377540	6131231
U	ANEVEQMLR		545.271	2	1088.53			4.1298e+06				528640	8178462
U	LEHLMDLTR		376.534	3	1126.58			2624800				291690	3515385
U	VPQLEVETHK		590.322	2	1178.63			2.1122e+06				175580	2840462
U	GTFDNAETKK		555.775	2	1109.54			451660				31645.1	607154
U	LNTQELFDDWAR		754.362	2	1506.71			5246200				499200	9522923
U	ALGHQLGR		426.246	2	850.477			696820				44466.1	1292262
U	LNMLVLELK		536.825	2	1071.64			4068000		94618.1			11132308
U	LGGSPFGPAGTGK		573.301	2	1144.59			6043000		165750			15910769
U	LLDDDTLLTTLENLKR		625.014	3	1872.02			27410000				4289200	92324615
U	AWTQVLLGQAEDKAEVDMDTDAPQVSHKPGGEPK		730.359	5	3646.76			2.8746e+06				143480	10357692
U	AATSPALFNR		524.283	2	1046.55			7.1668e+06				969520	18829231
U	SMANPPAAVK		493.26	2	984.506			1.17588e+06				132810	3099231
U	VPLALVNK		427.279	2	852.543			8394400				785830	17152308
U	TFSSLPVSR		497.272	2	992.529			5000000				662930	11833692
U	KLEHLLTELVHQR		404.737	4	1614.92			3465000				223260	9308615
U	EVDGLDVSKEGTEAWEAAMK		722.34	3	2164			1.19276e+06				182100	3718154
U	SFEWLSQMR		592.282	2	1182.55			1875840				247710	6623846
U	KLLDNVR		429.264	2	856.513			1.90412e+06		60908.1		135610
U	EWTDGLFTHVLR		491.921	3	1472.74			6405800				559860	11501692
U	VFEEDALSWEDKLNR		617.635	3	1849.88			4.276e+06				467750	17178462
U	FTQDTQPHYLYSPR		584.95	3	1751.83			7687400		254660			15860000
U	NLESALR		401.724	2	801.434			3.1432e+06				456550	7828923
U	TPVSLTEHPK		554.803	2	1107.59			1210080		26710.1			2280000
U	GKEDEGEEAASPMLQLQR		663.318	3	1986.93			2.7014e+06				510540	9300615
U	VAAPDVVVPTLDTVR		776.441	2	1550.87			3049800				360160	6465692
U	LQVLLR		371.253	2	740.491			1716540				201490	2231077
U	LVQTPLTDR		521.798	2	1041.58			4704000				395950	7624308
U	LEGVEGVAHLLDPK		492.94	3	1475.8					133490		542420	11155385
U	MLSAVSQQVQCLQEALR	Carbamidomethyl	654.336	3	1959.99			1.83598e+06				492400	8996154
U	NANEMFR		441.2	2	880.386			997820		52270.1			3288308
U	ESPEVLLTLDLLK		735.427	2	1468.84			1.27712e+07		314280			37655385
U	SNLPDNLK		450.743	2	899.471	61367.1		783100		37875.1
U	FGQMLGSNMTEFHSQLSK	Oxidation	686.652	3	2056.93					54659.1		196670	2051077
U	LLQDVR		372.224	2	742.434		22216.1	3.189e+06		87075.1			6176615
U	LDLEVR		372.716	2	743.418			4343000				370180	5261077
U	LLAESVTEVELFGK		767.922	2	1533.83			3.4836e+06				136300	5146154
U	NVVHELR		433.746	2	865.477			795520					1288508
U	VQYPQSQACK	Carbamidomethyl	604.79	2	1207.57							253960	4996923
U	NTLSLLVAGLKK		419.603	3	1255.79			2266000					6315692
U	QLQNLSQAAASGGAK	Gln->pyro-Glu	713.868	2	1425.72							326650	6191538
U	EALELTDTGLLSGSEER		910.45	2	1818.88							428080	7806462
U	DVLLVAQGEMALEEFLK		635.673	3	1904			3316800					7762923
U	FYFVGDEDLLELLGNSK		979.991	2	1957.97			10380000					37667692
U	GKEDEGEEAASPMLQLQR	Oxidation	668.649	3	2002.93			1515280					898323
U	EVQALLAEGLALVWESYK		673.698	3	2018.07			5364400					1.23878e+06
U	EALVNSCVFVHQTLHQANAR	Carbamidomethyl	765.387	3	2293.14			2340600					3896308
U	VLRPQVTAVAQQNQGEAPEPQDMK	Oxidation	884.113	3	2649.32			5411000		58509.1			2322615
U	LVAEDLPLLFSLLSDVFPGVQYHR		910.162	3	2727.46			5553200					15684615
U	LVAEDLPLLFSLLSDVFPGVQYHR		682.873	4	2727.46			1779360					7724154
U	VLTLSEDSPYETLHSFLSNAVAPFFK		971.495	3	2911.46			8582400					38546154
U	MPDGPVALEESYSAVMGLVTEVEQYVK		981.145	3	2940.41			1773640					9942769
U	TMTLFSALR		520.284	2	1038.55							404060	7692000
U	DLFQVAFNR		555.291	2	1108.57							670520	12818000
U	NTLSLLVAGLK		564.853	2	1127.69							197580	2700769
U	VDDLLLLEEK		593.832	2	1185.65							401100	5350000
U	DYLPVDQEELR		688.838	2	1375.66							481360	1.33542e+06
U	LSLSNALSTVLPLTQLR		609.363	3	1825.07							1092600	22367692
U	TYAEPLTAAMVEFYTMSQER		780.029	3	2337.07							842220	24747692
U	MDLEKPNYLVPDYMPVVYDK		810.397	3	2428.17							311200	6139385
U	VTDFGDKVEDPTFLNQLQSGVNR		860.429	3	2578.27							1067400	2.676e+07
U	FGNPLLVQDVESYDPVLNPVLNR		866.79	3	2597.35							2984400	50203077
U	LSCLPAFK	Carbamidomethyl	468.255	2	934.495							303500	6098308
U	LRDQLGTAK		501.291	2	1000.57			642920					1224262
U	SNLPDNLKK		514.79	2	1027.57			1.30574e+06					2794462
U	WFTSQVLR		518.782	2	1035.55							155650	2162154
U	DLQMPDGLR		522.761	2	1043.51							200880	1956769
U	ELVLSAGSTPK		551.311	2	1100.61							262970	4878154
U	VWEQLDQMK		588.79	2	1175.56							364210	4093692
U	EGTEAWEAAMK		611.774	2	1221.53							227460	2259077
U	EQPWVSVQPR		613.32	2	1224.63							289990	4174769
U	QALVALFTHLR		423.587	3	1267.74							131560	2659385
U	GKELVLSAGSTPK		643.869	2	1285.72			689320					1606615
U	FNALFVRPHLR		457.267	3	1368.78					47904.1			2790769
U	VLLTTQGVDMLSK		702.892	2	1403.77							557030	14144154
U	DSALQQQVANLQMK		787.404	2	1572.79							89989.1	2948923
U	ASVVTLPVYLNFTR		527.3	3	1578.88			347760					3865385
U	SPLVMDVLNLQGVQR		834.959	2	1667.9			2.2704e+06					3525846
U	RWTDENLDMVALK		530.936	3	1589.79							70787.1	1689077
U	QALETVNDYNPLMK		818.406	2	1634.8							132780	2108000
U	KLEHLLTELVHQR		539.314	3	1614.92					22647.1			3031231
U	AMSRPLLYSNWLSK		555.964	3	1664.87							288340	8309692
U	KASVVTLPVYLNFTR		569.998	3	1706.97							185460	5114462
U	KFLSDPQVHTVLVER		589.997	3	1766.97							133650	5665231
U	QTDVLQQLSLQMANAK		596.649	3	1786.92							143780	2223538
U	ALSKDHLYGTLDPNTR		450.986	4	1799.92							185910	3952308
U	RSELEEQQMHLNVGLR		485.501	4	1937.97							107890	2522000
U	DAATLMQPYFTSNGLVTK		978.99	2	1955.97							97478.1	3513231
U	DFPLNDLLSATELDKLR		654.018	3	1959.03			1.4433e+07		369120
U	MLSAVSQQVQCLQEALR	Carbamidomethyl	981.001	2	1959.99					54922.1			4835538
U	EVWNTYELDLVNYQNK		676.662	3	2026.96							250420	5828308
U	EVWNTYELDLVNYQNK		1014.49	2	2026.96							67757.1	3651538
U	FGQMLGSNMTEFHSQLSK		681.321	3	2040.94							569760	13406462
U	NLHVVFTMNPSSEGLKDR		511.762	4	2043.02							117600	7685385
U	AHQANQLYPFALSLLESVR		719.72	3	2156.14							401860	25480000
U	MQMLEDEDDLAYAETEKK		720.322	3	2157.94							386560	8027692
U	VLQLYQLTQLNHGLMMVGPSGSGK	Oxidation	863.117	3	2586.33							168860	2585846
U	HVPVVYVDYPGPASLTQLYGTFNR		898.462	3	2692.36							274040	22944615
U	EHLNSVSAMK	Oxidation	566.277	2	1130.54			305080
U	LMFEVQDLK	Oxidation	569.794	2	1137.57			3198800
U	ENFLPTLVNFSAEELSDALR		755.718	3	2264.13			13887400
U	EFGPVVLDYGK		612.319	2	1222.62							549520
U	MAPSVEK		381.197	2	760.379								706338
U	TMALTPR		395.218	2	788.421								4301077
U	RQHEQLR		483.765	2	965.515								30375
U	TSFLDDAFR		536.259	2	1070.5								1939231
U	GTFDNAETKK		370.852	3	1109.54								4748923
U	KYEFGESDLR		622.301	2	1242.59								3104923
U	TVENLKDPLFR		666.369	2	1330.72								1932154
U	QALVALFTHLRK	Gln->pyro-Glu	460.61	3	1378.81								1828462
U	SSLQSQCLNEVLK	Propionamide	760.393	2	1518.77								1864154
U	LKVNFLPELLTLSK		538.999	3	1613.98								5828308
U	QALETVNDYNPLMK	Gln->pyro-Glu	809.893	2	1617.77							263900
U	LQFVGACNPPTDPGR	Propionamide	821.904	2	1641.79								1704000
U	QLLAQVMLYSQGFR		551.964	3	1652.87								1597385
U	QTDVLQQLSLQMANAK	Gln->pyro-Glu	885.956	2	1769.9								14947231
U	GMLHQDHLTFAMLLAR		464.243	4	1852.94								2465538
U	GMLHQDHLTFAMLLAR		618.655	3	1852.94								2648308
U	NYMSNPSYNYELVNR		621.949	3	1862.83								2939385
U	NYMSNPSYNYELVNR		932.42	2	1862.83								3564154
U	LGEDLNKWQALLVQLR		632.695	3	1895.06								31536923
U	DVLLVAQGEMALEEFLK		953.005	2	1904								6345846
U	ALEHAFKLEHLMDLTR		385.608	5	1923								3719385
U	ALEHAFKLEHLMDLTR		481.758	4	1923								4730923
U	LLQDVRQDLADVVQVCEGK	Carbamidomethyl	729.048	3	2184.12								2194769
U	NLHVCLGGLFVPEAYLTATR	Carbamidomethyl	744.393	3	2230.16								44440000
U	LVPLLLEDGGDAPAALEAALEEK		778.753	3	2333.24								21533846
U	QNLFTTWSHHLQQANLQFR	Gln->pyro-Glu	784.726	3	2351.16								44866154
U	QNLFTTWSHHLQQANLQFR		593.053	4	2368.18								4120769
U	TLHTTASNWLHLLPQTLSPLK		791.109	3	2370.31								1693077
U	TLHTTASNWLHLLPQTLSPLKR		506.289	5	2526.41								2494615
U	LDRDPASGTALQELSFWLNLER		844.434	3	2530.28								48521538
U	VLLTLGDQDLDLSPSFVLFLSTR		850.467	3	2548.38								8355846
U	VLQLYQLTQLNHGLMMVGPSGSGK		857.786	3	2570.33								13302615
U	HEALLYTWLAEHKPLVLCGPPGSGK	Carbamidomethyl	694.118	4	2772.44	28304.1							10818923
U	VFYEEELDVPLVLFNEVLDHVLR		929.825	3	2786.45								7104000
U	SEPGGGEDGSAGLEVSAVQNVADVAVLQK	Acetyl	942.465	3	2824.37								19073846
U	VLTLSEDSPYETLHSFLSNAVAPFFK		728.873	4	2911.46								13999538
U	MDLEKPNYLVPDYMPVVYDKLPQPPTHR		671.943	5	3354.68								2538769
U	AWTQVLLGQAEDKAEVDMDTDAPQVSHKPGGEPK		912.697	4	3646.76								2134462
U	SQELEVK		416.724	2	831.434
U	RSELEEQQMHLNVGLR		646.999	3	1937.97
U	VAEVLFDAADANALEEVNLAYENVK		903.12	3	2706.34
	SPTB2_MOUSE|Q62261	Spectrin beta chain, non-erythrocytic 1
U	LDDLFER		454.23	2	906.445	226070	87538.1	23124000	87212.1	2013400	109150	960510	21801538
U	ALVADSHPESER		437.549	3	1309.63	158970	56567.1	22160000	52169.1	1377500	113750	607420	24136923
U	VAVVNQLAR		485.296	2	968.577	334430		37112000	145180	2.9235e+06	277020	1.1313e+06	33643077
U	VLLLSQDYGK		568.321	2	1134.63	172720		30818000	52356.1	1788400	128310	914850	27346154
U	DLVALEAK		429.75	2	857.486	113500	50758.1	13266200		1068600	61611.1	566390	13446923
U	SNAHYNLQNAFNLAEQHLGLTK		621.566	4	2482.24	309340	61190.1	36834000		2337500	140760	448200	37152308
U	VQAVVAVAR		456.785	2	911.555	253450	114600	25086000		2397800	153190	960300	20595385
U	ELEAENYHDLKR		506.251	3	1515.73	138130	62719.1	24918000		1.3272e+06	116010	383970	22241538
U	SALPAQSAATLPAR		677.378	2	1352.74	166090		30272000	45140.1	1947100	133750	685210	28586154
U	DLDDFQSWLSR		691.323	2	1380.63	639770		4.0204e+07	86753.1	3.7215e+06	167840	688770	30641538
N	LHCLENVDK	Carbamidomethyl	376.522	3	1126.54	112060		14934600		855590	66377.1	496230	19875385
U	LLTQHENLKNELDNYEEDYQK		659.817	4	2635.24	205280		41426000		2.1914e+06	170900	800970	54236923
N	FFSMVR		393.702	2	785.389	32806.1		6886000		555560	42292.1	361820	6940154
U	QLEAQEKPR	Gln->pyro-Glu	541.285	2	1080.56	149310		16606200		1242500	111320	592300	17896923
U	LAGLEER		394.219	2	786.423	184530	58752.1	18282000	236820		109540	676460
N	LLSDLNK		401.737	2	801.46		62199.1	16321800		1306300	82498.1	678076	18493846
U	LLEVLSGER		508.293	2	1014.57			33184000	88870.1	2260200	163040	1115900	29438462
U	LVSDGNLNSDR		595.294	2	1188.57	127670		17130000		978950	88740.1	742370	16436923
U	EAEKLESEHPDQAQALLSR		538.522	4	2150.06	346500		35078000		2250000	154190	1.0376e+06	34007692
U	HLLGVEDLLQK		422.247	3	1263.72	58501.1		4672400		483280	25814.1	301840	7354154
U	MHTTFEHDLQALGTQVR		496.748	4	1982.96	139300	59826.1	9.4032e+06		969240	55084.1	371480	15049231
U	FATDGEGYKPCDPQVLR	Carbamidomethyl	651.644	3	1951.91	156510	83191.1	27898000	34531.1	1642500		1050000	28560000
U	LLLEVHQFSR		414.572	3	1240.69	169590		17901800		1870400	136020	670880	26321538
U	LFQLNR		395.732	2	789.45		53824	18750800	74194.1	1413600		588110	15357077
U	MPLATSTDHGHNLQTVQLLLK		580.064	4	2316.23	81611.1		10822400		855130	78549.1	595320	22872308
U	LTTLELLEVR		593.856	2	1185.7	257110		2.679e+07	74154.1	1759200		936030	25683077
N	ETWLSENQR		581.778	2	1161.54	127220		16577000		886960		442360	14793077
U	LVDTGDKFR		525.783	2	1049.55	39780.1		2923600		213700		82328.1	2968769
U	DGMAFNALLHK		406.21	3	1215.61	34410.1		7857000		797170		433800	12218923
U	ALVADSHPESER		655.82	2	1309.63	29019.1		2709400		152410		59345.1	2664462
U	LPEELGR		407.227	2	812.439	40943.1		3261200		236980		180490	2.90154e+06
U	QLWGLLLEETEKR		538.966	3	1613.88	40848.1		3769600		420350		139290	6495846
U	QNLLSQSHAYQQFLR		611.652	3	1831.93	78477.1		10174400		791800		361370	1.76723e+07
N	DLTSVNLLLK		558.337	2	1114.66	54246.1		4089800		380800	39115.1		4405077
N	FQLQDLSVETEDNKEK		641.65	3	1921.93	170160		27963860		1971600	112650		29553846
U	AFEDEMSGR		521.219	2	1040.42	57944.1		9809000		818090		497810	13187385
U	TLETPAAQMEGFLNR		839.417	2	1676.82	49571.1		6.5468e+06		653220		280290	8636000
U	TQLLAASYELHK		458.586	3	1372.73			29834000		2.142e+06	108660	1.0428e+06	30775385
U	EGEDMLAEEHFGSEK		569.91	3	1706.71			7365400		461520	42479.1	390440	7702923
U	LNAVVETGR		479.769	2	957.524			6483000	29490.1	443820		391520	6119692
U	LVSQDNFGFDLPAVEAATK		674.677	3	2021.01	89719.1		9472400		1024100		449180	10044000
U	HQLLEQAVEDYAETVHQLSK		780.061	3	2337.16	136380		20312000		2215000		444550	22138462
U	LLSSDDYGKDLTSVMR		600.633	3	1798.88	61998.1		9426400		1176400	83543.1	472570
U	EQWANLEQLSALR		779.405	2	1556.79	135770		9691800		1014900		520240	18460000
U	EVVAGSHELGQDYEHVTMLQER		632.552	4	2526.18	217490		2.0242e+07		2139100		1131800	36623077
U	LLDPEDLSVDHPDEK		574.612	3	1720.82	193390		33778000	99901.1	2002300	147040
U	TAGYPNVNLHNFTTSWR		659.99	3	1976.95	151630		15833000		1301200		641100	24060000
U	LVSQDNFGFDLPAVEAATK		1011.51	2	2021.01	155140		8141400		889350	68830.1		8456000
U	SQNLLTDSSSLNAEALR		909.963	2	1817.91			15628400		1564000	97083.1	501220	21166154
U	LQQFLR		402.74	2	803.465	122350		18797600		1076500		555740	1.41266e+07
U	VLESTQDLGNDLAGVMALQR		710.7	3	2129.08	133440		24954000		1690400	225550		20503077
U	EAEKLESEHPDQAQALLSR		717.694	3	2150.06	67943.1		13276800		681370		497700	14650615
U	KHEALETDLAAYEER		444.471	4	1773.85		55518.1	10925200		720180		260090	10209538
U	EALCEVALDYK	Carbamidomethyl	655.818	2	1309.62	27733.1		7.3722e+06		358130		195780	5880769
U	VLDNALETEK		566.298	2	1130.58	2.2188e+06		39602000			132330	1192800	33480000
N	VHLENMGSHDLVDGNHR		483.23	4	1928.89	125770		16139000		1.5266e+06	107450		11294615
U	LQAAYAGDK		468.743	2	935.471	52601.1		5208600			48061.1	307770	6196615
U	LQAAYAGDKADDLQK		536.274	3	1605.8	53235.1		7554800		342720		175050	5256923
U	MWEVLESTTQTK		726.856	2	1451.7			6949200		716800	31937.1	333840	12762923
U	KHEALETDLAAYEER		592.292	3	1773.85			20746000		1.319e+06	60088.1	711030	24160000
U	LEDLEVLQHR		417.895	3	1250.66	48096.1		2.9076e+06			29119.1	173960	2702769
U	QNLLSQSHAYQQFLR	Gln->pyro-Glu	908.46	2	1814.91		46604.1	1.8954e+07		997390		324280	24558462
U	EVDDLEQWLAER		751.86	2	1501.7			14854800	69374.1	1830400		678840	20287692
N	VHLENMGSHDLVDGNHR		386.785	5	1928.89	30470.1		3.9348e+06		410190		239650	3795538
U	HALVEADLALQAER		512.611	3	1534.81	58151.1		3.60934e+06		549441		102150	2117538
N	HRPDLLDFDK		419.219	3	1254.64		56797.1	2.4074e+07	35538.1	871000	55351.1	489310	11869692
U	EGMQLLSEKPETEAVVK	Oxidation	635.328	3	1902.96	72165.1		1.73192e+07		359420		175610	2.74415e+06
U	LTDLYTDLR		555.295	2	1108.58		33261.1	1.15746e+06		831420		807370	15601538
U	LQEKVDSLDDR		439.893	3	1316.66			2307200		200520	25280.1		3272615
U	VAHMEFCYQELCQLAAER	Carbamidomethyl+Carbamidomethyl	752.34	3	2254			7275800		654540	80750.1		10881692
U	LAELSDVWEEMK		725.35	2	1448.69	91355.1		12787600		1273900		574030
U	LTDLYTDLRDGR		479.916	3	1436.73	125030		16579000		1578600	61686.1
U	LEMNLGLQK		523.289	2	1044.56			15584000		883030	45045.1		16369231
U	LNAVVETGRR		372.216	3	1113.63			5666800		363520	26277.1		5.52523e+06
U	DLMLWMEDVLR		710.852	2	1419.69	109440		15054400		1015500			30476923
U	MLTAQDMSYDEAR		765.832	2	1529.65			7326600		605370		403540	12511846
U	SAATWDER		468.214	2	934.414					456330	41057.1	384000	9670000
U	SQNLLTDSSSLNAEALR		606.978	3	1817.91				30168.1	971290		674760	13050769
N	DALLLWCQMK	Carbamidomethyl	639.323	2	1276.63			7364000		727150		312100	11031846
N	VHLENMGSHDLVDGNHR	Oxidation	389.984	5	1944.89			3471000		92438.1		35119.1	593815
U	QLMHNGHPSEK	Gln->pyro-Glu	420.865	3	1259.57	38841.1		3.8976e+06		366740		204750
U	LQALDTGWNELHK		762.894	2	1523.77			2673600		235750		114470	3155692
U	FESLEPEMNNQASR		826.373	2	1650.73			9395200		737430		321500	11300308
U	HLLGVEDLLQK		632.867	2	1263.72	84843.1		12042400		1298300			11823385
U	ELEELQSQAQALSQEGK		944.468	2	1886.92	40499.1		6885400		304950			6594462
N	HRPDLLDFDKLK		374.961	4	1495.81			3034200		230760		101970	2782462
U	SNAHYNLQNAFNLAEQHLGLTK		828.419	3	2482.24			8769400		553630		145520	8179385
U	AKDEQSAVSMLK		436.227	3	1305.66			5317200		225140		275340	7619538
U	LESEHPDQAQALLSR		565.288	3	1692.84			1.5271e+06		178100		165180	2173846
U	ELGQSVDEVEK		616.804	2	1231.59	186050	84926.1			2146200			27535385
U	LEMNLGLQK	Oxidation	531.287	2	1060.56	36888.1		7778400		283270	21192.1
U	FMELLEPLSER		682.35	2	1362.69			11550600		1041000		580150	19249231
U	MHTTFEHDLQALGTQVR		661.995	3	1982.96			6069800		572790		188140	10758769
U	DQNTVETLQR		602.302	2	1202.59			11676200		943590		553040	13074308
U	EGMQLLSEKPETEAVVK		629.996	3	1886.97			20990000		1441600		1277300	32672308
U	LVSSNDVGHDEYSTQSLVK		693.339	3	2077			30358000		2111500		1504700	46060000
U	QALQDTLALYK		632.351	2	1262.69			7156400		538050		245320	6243692
U	EAASELLMR		510.263	2	1018.51			11307000		879570		529500	14166462
U	AFEDEMSGR	Oxidation	529.216	2	1056.42			3444000		86823.1		82395.1	654831
U	DVEDELLWVGER		730.357	2	1458.7			13235000		1031100		509370	14262000
U	SLLDACEGRR	Carbamidomethyl	588.793	2	1175.57			2335000		98854.1		59017.1	2008769
U	LQALDTGWNELHK		508.932	3	1523.77			2.6936e+07		2206200		1068300	39536923
U	ELEELQSQAQALSQEGK		629.981	3	1886.92			7041800		409170		483130	8015077
U	FLQDCQELSLWLNEK	Carbamidomethyl	641.649	3	1921.92	27241.1		2655600		358020			2747846
U	LLTQHENLKNELDNYEEDYQK		879.421	3	2635.24			5786600		342300		143790	7946923
U	TQLLAASYELHK		687.375	2	1372.73			7672400		483480		148130	5535846
U	TLETPAAQMEGFLNR		559.947	3	1676.82			5321800		589300		346310	10323077
U	VDTVNNMADELLNSGHSDAATLAEWK		934.44	3	2800.3			26248000		3642200		516510	51906154
U	EQWANLEQLSALR		519.939	3	1556.79			1741040		287670		314800	4687692
U	SWHNVYCVLNNQEMGFYK	Carbamidomethyl	763.679	3	2288.01			5771200		545990		231400	15476923
U	SAASGLPYHSEVPVSLK		581.309	3	1740.9	167410		33074000		2110000			39250769
U	MPLATSTDHGHNLQTVQLLLK		773.083	3	2316.23			6632600		673410	203050		12418923
U	QRLEMNLGLQK	Gln->pyro-Glu	656.856	2	1311.7			3.8082e+06		461160		104200	4020769
U	HNLLASK		391.73	2	781.445			2.3786e+06		125560		93718.1	1965231
U	DVAEELTNYRPTLDTLHEQASALPQAHAESPDVK		937.213	4	3744.82			6152200		296400		257240	14219846
U	FESLEPEMNNQASR		551.251	3	1650.73			3.4306e+06		144120		312540	4578769
U	EVVAGSHELGQDYEHVTMLQER		843.068	3	2526.18					553840		396060	10264000
U	LLDPEDLSVDHPDEK		861.415	2	1720.82					125610		93109.1	2137385
U	KHQLLEQAVEDYAETVHQLSK		617.321	4	2465.26			6124000		193700			6162615
N	VHLENMGSHDLVDGNHR		643.971	3	1928.89			1.65496e+06		156210			1664923
U	QLQEDAAR	Gln->pyro-Glu	457.222	2	912.43					223640		102670	2099077
N	LHCLENVDK	Carbamidomethyl	564.279	2	1126.54	28474.1				171400			3.95723e+06
U	VSEEAESQQWDTSK		812.36	2	1622.71			2029600		74238.1			2067538
U	SAASGLPYHSEVPVSLK		871.46	2	1740.9			2610400		129350			2657077
N	QEKLEQLAR	Gln->pyro-Glu	549.301	2	1096.59			6.0068e+06		561300	34616.1
U	LLLEVHQFSR		621.354	2	1240.69					353730		97433.1	5325231
U	DASVAEAWLLGQEPYLSSR		698.016	3	2091.03					4043900		1629500	5.02092e+07
U	QLWGLLLEETEKR	Gln->pyro-Glu	799.433	2	1596.85			59894000		3396400		1166400
U	DALLSALSLQNYHLECNETK	Carbamidomethyl	773.714	3	2318.12			10178000				427870	16233846
U	EALCEVALDYKK	Carbamidomethyl	480.246	3	1437.72	56165.1		12189800		668240
U	KLTGMER		417.729	2	833.443			4417600		161620			3504154
U	FMELLEPLSER	Oxidation	690.347	2	1378.68					242210		119620	2534462
U	SLLTYVVTYYHYFSK		628.657	3	1882.95			74566000		2813600			71143077
U	QALQDTLALYK	Gln->pyro-Glu	623.838	2	1245.66		35080.1			621170			10304308
U	QLQEDAAR		465.736	2	929.457			633460				75062.1	582508
U	LPEELGRDQNTVETLQR		666.68	3	1997.02			9628000		652120			10058923
U	MHTTFEHDLQALGTQVR	Oxidation	667.327	3	1998.96					129390		119010	1.64015e+06
U	VLESTQDLGNDLAGVMALQR	Oxidation	716.032	3	2145.07			5944400		251500			1.07834e+06
U	DTGNLGQER		495.236	2	988.457			1222340		73965.1			2359231
U	DGLNEAWADLLELLDTR		972.489	2	1942.96			18483000		763340			24461538
U	ENEVLEAWK		559.28	2	1116.55			15073200		1143500			13594923
U	FLQDCQELSLWLNEK	Carbamidomethyl	961.969	2	1921.92			3140800		305960			2988769
U	SGHFEQALKEGEDMLAEEHFGSEK		677.059	4	2704.21			8340400				156490	12061385
U	LWEYLLELLR		674.387	2	1346.76			68354000		2143600			48032308
U	DVEDELLWVGER		487.24	3	1458.7			3049200				208160	2192923
N	GNLEVLLFTLQSK		487.949	3	1460.82			24360000		2008700			16360000
U	FREFAR		413.222	2	824.429			1.3339e+06		143610			2.09231e+06
U	LTTLELLEVRR		448.273	3	1341.8			4130000		874680			9855077
N	VHLENMGSHDLVDGNHR	Oxidation	487.229	4	1944.89			9582400		183690			1.40728e+06
U	DGMAFNALLHK		608.811	2	1215.61			2634000		298530			3.29431e+06
U	FESLEPEMNNQASR	Oxidation	834.37	2	1666.73			5864600		110010			1.29846e+06
U	VAHMEFCYQELCQLAAER	Carbamidomethyl+Carbamidomethyl+Oxidation	757.671	3	2269.99			6130000		117320			1.23711e+06
U	DVSSVELLMNNHQGLK		892.454	2	1782.89			2152400		256170			3556154
U	HYASEELKEK		411.875	3	1232.6			4047400				66999.1	2441538
N	DALLLWCQMK	Carbamidomethyl+Oxidation	647.32	2	1292.63			6206000				103680	1.25837e+06
U	HQLLEQAVEDYAETVHQLSK		585.297	4	2337.16			6766800		453520			4944462
U	LTDLYTDLRDGR		719.37	2	1436.73			2050000		176450			1766615
U	AQTLPTSVVTLTSESSPGKR		687.039	3	2058.1			19227800		1.8109e+06			46596923
U	KQQMLENQMEVR	Oxidation	517.254	3	1548.74			1769440		44608.1			475600
U	TTTVATDYDNLELQQQYSDVNNR	Acetyl	910.754	3	2729.24			2661800				219110	2980769
U	VDSLDDR		410.196	2	818.377			134574				70602.1	697046
U	VDTVNNMADELLNSGHSDAATLAEWK	Oxidation	939.771	3	2816.29			4542200		144890			1.82969e+06
U	NDSFTACLELGK	Carbamidomethyl	677.819	2	1353.62			4.5778e+06		646000			5310923
U	ELHQFNR		472.241	2	942.467			2.2458e+06		86851.1			1728923
U	LLQLTEK		422.761	2	843.506			21868000					1.78677e+07
U	RLTVQTK		423.264	2	844.513			1423960					981415
N	RHEAFEK		458.735	2	915.456			138342					201908
U	EAASELLMR	Oxidation	518.261	2	1034.51			9793400		343090
U	HEWEAHNKK		393.528	3	1177.56			96636					161446
U	RPPSPDPNTK	Phospho	594.774	2	1187.53			481920					193185
N	ALADEREAVQK		615.328	2	1228.64			1661760					1503108
U	QRLEMNLGLQK	Gln->pyro-Glu+Oxidation	664.853	2	1327.69			3711000		152020
U	LSDGNEYLFQAK		692.841	2	1383.67					748440		536820
U	DLMLWMEDVLR	Oxidation+Oxidation	726.847	2	1451.68			2635200		41761.1
U	LAELSDVWEEMK	Oxidation	733.348	2	1464.68			8722600		125940
U	MWEVLESTTQTK	Oxidation	734.853	2	1467.69			2003000					652369
U	AELFTQSCADLDK	Carbamidomethyl	749.348	2	1496.68			2537400		114150
U	MLTAQDMSYDEAR	Oxidation	773.829	2	1545.64			3355400		58512.1
U	EGEDMLAEEHFGSEK	Oxidation	575.242	3	1722.7			3397200					615062
U	LLSSDDYGKDLTSVMR	Oxidation	605.965	3	1814.87	72979.1		9263200
U	QNLLSQSHAYQQFLR	Gln->pyro-Glu	605.976	3	1814.91			6217800					9243692
U	DGLNEAWADLLELLDTR		648.662	3	1942.96					1244400			40552308
U	FANSLVGVQQQLQAFNTYR		1092.56	2	2183.11			11360400					4185538
U	SWHNVYCVLNNQEMGFYK	Carbamidomethyl+Oxidation	769.01	3	2304.01			4007000				100270
U	QQMLENQMEVR		703.332	2	1404.65			1.31794e+06		138600
N	GNLEVLLFTLQSK		731.419	2	1460.82			4.0484e+07		3755500
U	EQWANLEQLSALRK		562.637	3	1684.89			2.6188e+06		346290
U	TQTALASEDMPNTLTEAEK		1025.49	2	2048.96			9.5278e+06		696710
U	TQTALASEDMPNTLTEAEK		683.993	3	2048.96					449450			8239385
U	HQAFMAELASNK		449.556	3	1345.64					103030			1765231
U	KQALQDTLALYK		464.601	3	1390.78							99646.1	2142923
U	EVDDLEQWLAER		501.576	3	1501.7							108580	1339415
U	AQTLPTSVVTLTSESSPGK		952.005	2	1901.99					124610			2025692
U	VLESTQDLGNDLAGVMALQR		1065.55	2	2129.08					539220			4157846
U	LVSSNDVGHDEYSTQSLVKK		552.28	4	2205.09					450590		69715.1	4356308
U	KSNAHYNLQNAFNLAEQHLGLTK		653.59	4	2610.33					102210			3250923
U	HKDVAEELTNYRPTLDTLHEQASALPQAHAESPDVK		803.003	5	4009.98					213300			5070308
U	CKEMAELTR	Carbamidomethyl	379.851	3	1136.53					185370
U	KHEWEAHNK		393.528	3	1177.56			702520
U	DGMAFNALLHK	Oxidation	411.541	3	1231.6			8354400
U	QLMHNGHPSEK	Gln->pyro-Glu+Oxidation	426.196	3	1275.57			1221280
U	LYAGLKDLAEER		459.917	3	1376.73			1952200
U	MLTAQDMSYDEAR	Oxidation+Oxidation	781.827	2	1561.64			1643720
U	KQQMLENQMEVR	Oxidation+Oxidation	522.585	3	1564.73			687780
U	KQEDFMTTMDANEEK	Oxidation	611.594	3	1831.76			2448800
U	KQEDFMTTMDANEEK	Oxidation+Oxidation	616.926	3	1847.76			2122000
U	MPLATSTDHGHNLQTVQLLLK	Oxidation	778.414	3	2332.22			3766600
U	LEEASLLHQFQADADDLDAWMLDLLK		1000.83	3	2999.46								13700308
U	DASVAEAWLLGQEPYLSSR		1046.52	2	2091.03					1963700
U	SGHFEQALKEGEDMLAEEHFGSEK		541.849	5	2704.21					404090
U	EASLGEASK		446.225	2	890.434								563862
U	LLSSDDYGK		499.245	2	996.476								4417077
U	KHEWEAHNK		589.789	2	1177.56								62792
U	ELEAENYHDLKR		758.873	2	1515.73			1.02774e+06
N	FQLQDLSVETEDNK		833.402	2	1664.79								2272154
U	FFWEMAEEEGWLR		865.388	2	1728.76								15710769
U	EGMQLLSEKPETEAVVK		944.49	2	1886.97								1793692
U	LFQEMLYLMDWMDEMK		708.317	3	2121.93								3324154
U	DMGEMVTQGQTDAQYMFLR		740.996	3	2219.96								12578308
U	DMGEMVTQGQTDAQYMFLR		1110.99	2	2219.96								5922923
U	VDTVNNMADELLNSGHSDAATLAEWK		701.082	4	2800.3								11225692
U	LEEASLLHQFQADADDLDAWMLDLLK		750.872	4	2999.46								2906769
U	QAEAFLNNQEYVLAHTEMPTTLEGAEAALK	Gln->pyro-Glu	1091.53	3	3271.57								29652308
U	QAEAFLNNQEYVLAHTEMPTTLEGAEAALK		1097.21	3	3288.6								5254462
	MYO5A_MOUSE|Q99104	Unconventional myosin-Va
U	AALTVQR		379.73	2	757.445	128880		37184000	66646.1	2143200	38576.1	2006500	37453846
U	AATLVLQSYLR		617.861	2	1233.71	130530		5.10546e+07	59570.1	2707600	40066.1	1485100	55081538
U	VLSLQEELAK		565.327	2	1128.64	349510			198320	4836000	116200	3.9961e+06	89478462
U	LGNADSFHYTK		418.203	3	1251.59	119140		63944000		2704300	66808	3154900	69244615
U	YQNLLNEFSR		642.323	2	1282.63	197310		85948000		3152700	57393.1	3855600	83781538
U	LLGANMR		387.718	2	773.422	36564.1		2.5274e+07		1035700	21187.1	1.2972e+06	2.55969e+07
N	AGQVAYLEK		489.766	2	977.518	181280		78544000	63049.1	2615200		3433700	57233846
U	LEASLQHELTR		432.902	3	1295.68	293040		130144000	166400	4365400		4455500	90687692
N	TYLLEK		383.721	2	765.427	103830		43630000		1552800	39739.1	1912600	32516923
U	LSAAGFPSR		453.246	2	904.477	53467		26202000		1075400	32764.1	1356800	21384615
U	LLESQLQSQK		587.327	2	1172.64	73113.1		58812000	51372.1	1.3531e+06		2502700	4.49646e+07
U	LLAGLLHLGNVGFASR		546.654	3	1636.94	146490		71628000		3943300	112420	3810300	100166154
U	YLELGFDKR		380.873	3	1139.6	79808.1		68540000		1463100	45700.1	1753400	44138462
U	SLLTSTLNSLK		588.845	2	1175.68	93503.1		20816000	40744.1	1616500		1811700	38600000
U	QLMQDELDRK	Gln->pyro-Glu+Oxidation	425.54	3	1273.6	185370	155652	586280	172301	157460	292270	422540	1.55351e+06
U	VSVSFLR		404.24	2	806.465	172040		52954000		2187600		2332100	43335385
U	QLELDLNDERLR	Gln->pyro-Glu	748.889	2	1495.76	127350		43080000		1752100		1106900	46500000
U	QLELDLNDERLR		505.27	3	1512.79	49747.1		19580000		791150		481230	22106154
U	VLASNPLMESLGNAK		772.411	2	1542.81	73379.1		25218000		904660		1017100	28596923
U	SLLTSTLNSLKK		652.893	2	1303.77	29728.1		6822800		456870		327560	7487385
U	LEASLQHELTR		648.849	2	1295.68	26256.1		14569600		379970		461340	9834615
U	GTDDTWAQK		511.233	2	1020.45	28853.1		20638000		522460		775820	17558462
U	HFADKVEYQCEGFLEK	Carbamidomethyl	667.312	3	1998.91	74969.1		4.6126e+07		851090		1050900	37796923
U	VLNLYTPVNEFEER		861.938	2	1721.86			94864000	93979.1	3113200		3248900	96964615
U	YFATVSGSASEANVEEK		894.918	2	1787.82			30717420	42536.1	1290096		1368800	32433846
U	SLLTSTLNSLKK		435.598	3	1303.77	76173.1		20388000		1285500		1160600	27075385
U	ALVYLQCCFR	Carbamidomethyl+Carbamidomethyl	665.326	2	1328.64	111190		39802000		1543300		774710	51940000
U	LLESQLQSQKR		443.921	3	1328.74			37890000	87321.1	1486200		1.1881e+06	4.23538e+07
U	NLLLELKPR		548.348	2	1094.68			16996200		667900	15681.1	490270	11576769
N	LQQQFNMHVFK		473.912	3	1418.71			63488000		1636700	44221.1	3055800	60198462
U	NKDTVFEEQLK		450.901	3	1349.68	110180		52746000		1471100		1.8897e+06	39835385
U	LATATETYLKPLSK		512.627	3	1534.86	114890		54098000		1.8562e+06		1945700	50215385
U	QKDVLGDR	Gln->pyro-Glu	457.241	2	912.466	47550.1		18033200		562100	45907.1		13205231
U	YFATVSGSASEANVEEK		596.948	3	1787.82			12889400	25993.1	550050		1100200	15301077
U	RVTELEQEK		566.304	2	1130.59	44231.1		29638000		391710		515630	15327385
U	VVFQAEEER		553.777	2	1105.54			42576000		1006100	29030.1	2213500	22073846
U	VLLLHLEEGKDLEYR		457.506	4	1825.99	102770		6.92863e+07		1980900		1935300	70378462
U	NSLHLLMETLNATTPHYVR		553.29	4	2209.13	79224.1		13788200		485540		648070	3.008e+07
U	LTNLEGVYNSETEKLR		622.658	3	1864.95	121540		2.2844e+07		1.3107e+06		495090	35333846
U	MLPELFQDDEKALSPTSATSSGR	Phospho	854.059	3	2559.16		79863.1	7500200		478550		751520	19230769
U	HADYLNDDQKVR		491.908	3	1472.7	92185.1		54914000		1667600	72716.1		35135385
U	SHENEAEALR		385.851	3	1154.53			8027000		276560		311200	6592462
U	QNEHCLTNFDLAEYR	Carbamidomethyl+Gln->pyro-Glu	946.915	2	1891.82			19099800		462400		652780	19286154
U	DSPQLLMDAK		559.282	2	1116.55			29498000		722130		1294700	26784615
U	VLMEQLTSVSEELDVR		616.652	3	1846.93			3.15906e+06		163720		208950	2879385
N	ACGVLETLR	Carbamidomethyl	509.771	2	1017.53			76216000		2141500		2718600	55696923
U	ETLEPLLQAAQLLQVK		598.684	3	1793.03			212080000		6606400		7050900	155076923
U	KLATATETYLKPLSK		555.326	3	1662.96			33308000		1135600		926100	34290769
U	LMQLQR		394.726	2	787.437			23506000		1122800		1273100	26303077
U	LTNENLDLMEQLEK		845.422	2	1688.83			39470000		1405500		1920700	44080000
U	LYNTHLNK		501.772	2	1001.53			6823200		181470		225900	7264154
U	KVPLDMSLFLK		645.878	2	1289.74			18797800		615340		474810	19913846
U	VLLLHLEEGKDLEYR		609.672	3	1825.99			40726000		842560		859750	43838462
U	DDKNTMTDSTLLLEDVQK	Oxidation	694.668	3	2080.98			4.781e+07		430820		668640	8774462
U	LTNENLDLMEQLEK	Oxidation	853.419	2	1704.82			14017000		207590		180030	2578154
U	SAPEVTAPGAPAYR		693.854	2	1385.69			6.9838e+07	87090.1	1788600		1.9448e+06	44049231
N	VWLPDPEEVWK		699.359	2	1396.7				36899.1	1249300		1310000	26204615
U	VTELEQEK		488.253	2	974.492			26208000		780940		1219900	24073846
U	GELQSLKEENNR		708.857	2	1415.7			1554260		48068.1		88403.1	1430554
U	RAATLVLQSYLR		464.277	3	1389.81			8006600		372100		315600	7628769
U	LHLGMENK		471.247	2	940.48			1.01196e+07		266780		291840	9.67031e+06
U	FPFTFDEKR		396.201	3	1185.58			13160000		395220		389850	10699846
N	QELESENKK	Gln->pyro-Glu	544.267	2	1086.52			13553400		279150		558170	13384154
U	LGNADSFHYTK		626.801	2	1251.59			8351800		240130		320810	8238308
U	DKNLMNSGAK		539.271	2	1076.53			4312800		113420		137670	4044154
U	KLGELEVGQMENLSPGQLLDEPLRPVNLPR		836.203	4	3340.78			27958000		889220		979120	60289231
U	TDSTHSSNESEYTFSSEFAETEDLAPR		1013.1	3	3036.27			5.39194e+06		256530		270410	10235846
U	GAELEYESLKR		432.226	3	1293.66			50620000		1.0528e+06		1.7643e+06	40213846
U	DKGELAQAYLGLK		469.261	3	1404.76			24592000		558160		1157900	19489231
U	FPFTFDEK		515.748	2	1029.48			10272200		222470		364600	5413231
U	LLAGLLHLGNVGFASR		819.478	2	1636.94			7877200		408290		284180	10721077
U	SHENEAEALRGELQSLK		637.657	3	1909.95			5261400		232800		228010	7200154
U	VLNLYTPVNEFEER		574.961	3	1721.86			6265000		187450		789890	9193385
U	LTNENLDLMEQLEK		563.95	3	1688.83			4879200		217310		690410	7.02092e+06
N	LEQEEYMK		535.247	2	1068.48			13964200		348960		1018700	1.19918e+07
N	LGLLDLLDEECK	Carbamidomethyl	709.366	2	1416.72			63414000		1325200		3777100	53870769
U	SHENEAEALR		578.273	2	1154.53			1851840		49813.1		41219.1	1320031
U	NKDTVFEEQLK		675.849	2	1349.68			15150200		397260		503330	10874000
U	QNEHCLTNFDLAEYR	Carbamidomethyl	637.288	3	1908.84			13857200		298990		673770	15375692
U	NYHLFYQLCASAK	Carbamidomethyl	538.929	3	1613.77			5338400		150000		160420	5225231
U	YNVSQLEEWLR		718.862	2	1435.71			41088000		2380700		2589100	55049231
U	ALSPTSATSSGR	Phospho	607.774	2	1213.53	33967.1		8493600		389330			9407231
U	QYSGEEGFMK		588.255	2	1174.5			5618800		209020		353760	4.72646e+06
U	NSLHLLMETLNATTPHYVR		737.384	3	2209.13			7147600		263100		166270	15082000
U	YDDLKEEMTLMLNVPKPGHK		472.442	5	2357.18			2.045e+06		65348.1		101380	4270462
U	ETLEPLLQAAQLLQVK		897.522	2	1793.03			99820000		3495000		2050400	96423077
N	NQSLLVSGESGAGK		673.849	2	1345.68			54330000		1673800		2922700	65260000
N	YLELGFDK		492.755	2	983.496			9128600		178120		388070	5867231
U	WTYQEFFSR		632.293	2	1262.57			20190000		745150		1079100	13371077
U	AKEEERPQLR		419.23	3	1254.67			15755400		173420		270770	7826462
U	MLPELFQDDEKALSPTSATSSGR	Oxidation+Phospho	859.391	3	2575.15			6718000		90808.1		206420	3281077
U	KEEQVFR		468.251	2	934.487			1430880		41746.1		64121.1	792769
N	KEEVLLLR		500.313	2	998.612			27478000		686470		719790	15365692
U	NELNELR		444.233	2	886.451			2223800		107690		217870	1.99385e+06
U	VEYQCEGFLEK	Carbamidomethyl	701.321	2	1400.63			5634200		149570		473320	5.14954e+06
U	MLPELFQDDEK		682.824	2	1363.63			22766000		629080		1187700	22096923
U	EMTETMER		513.715	2	1025.42			10507200		438860		758750	13425538
U	ALSPTSATSSGR		567.791	2	1133.57			12831000		468220		759220	16852308
U	KDSPQLLMDAK		623.329	2	1244.64			5607200		255410		210360	4503538
U	QGGSPMLEGVDDAKEMAHTR	Gln->pyro-Glu	704.654	3	2110.94			7.4166e+06		271020		532090	13088615
U	YDDLKEEMTLMLNVPKPGHK		590.301	4	2357.18			3.562e+06		107650		169980	6147385
U	TEEPLEK		423.216	2	844.418			8683000		154730		589330	1.00668e+07
U	TSSLADEGTYTLDSLLR		614.642	3	1840.91			54884000		2862500		1580000	34643077
U	YLCMQR	Carbamidomethyl+Oxidation	443.699	2	885.384			8350600		117190		179430	1384015
U	DDKNTMTDSTLLLEDVQK		689.337	3	2064.99			28662000		893030		2270300	57066154
U	KDSPQLLMDAK		415.888	3	1244.64			3518600		104270		289520	5.33662e+06
U	KVPLDMSLFLK		430.921	3	1289.74			19080800		572700		858240	28426154
U	QETDQLVSNLKEENTLLK		701.371	3	2101.09			11577200		245230		657460	12555846
U	LKNELNELR		376.884	3	1127.63			8819000		332770		386410	7731846
U	MLPELFQDDEK	Oxidation	690.821	2	1379.63			17477200		239680		485850	3797846
U	LTNLEGVYNSETEK		798.891	2	1595.77			90380000		1212800		2145600	52818462
U	CALFEKPR	Carbamidomethyl	510.768	2	1019.52			3236600		68979.1		97022.1	1444923
U	TSSLADEGTYTLDSLLR		921.46	2	1840.91			110746000		5879600		1887600	56275385
U	YNVSQLEEWLRDK		560.618	3	1678.83	48818.1		6831000		517680			1.34085e+07
U	HADYLNDDQK		609.773	2	1217.53			24368000		495320		1124100	9747077
U	QGGSPMLEGVDDAKEMAHTR	Gln->pyro-Glu+Oxidation	709.986	3	2126.94			10173400		164200		305870	3.52231e+06
U	VLASNPLMESLGNAK	Oxidation	780.408	2	1558.8			11095800		176110		190920	2729385
N	NPDLLVGENDLTALSYLHEPAVLHNLR		754.149	4	3012.57			380140000		14683000		3947400	471138462
N	LEQEEYMK	Oxidation	543.245	2	1084.47			7.8666e+06		52691.1		124920	791031
U	QQQLLAQNLQLPPEAR	Gln->pyro-Glu	915.497	2	1828.98	35809.1		8825400		344330			5656462
U	TGELPHLR		461.759	2	921.503			4.8016e+06		131000		141940	3715385
U	LEERYDDLK		590.796	2	1179.58	434610	280290		29399.1	391396	499760	280190	511677
U	LLGANMR	Oxidation	395.716	2	789.417			8755000		123170		166960
N	LQQQFNMHVFK	Oxidation	479.243	3	1434.71			33054000		316560		488770
U	LGLLDLLDEECKMPK	Carbamidomethyl+Oxidation	597.307	3	1788.9			45614000				320000	4226462
U	AASELYTK	Acetyl	462.737	2	923.46			13264400				826560	12100769
U	LLESQLQSQKR		665.378	2	1328.74			4652400		172320			4791846
U	VLMEQLTSVSEELDVR		924.475	2	1846.93			853800		216130			3122462
U	RVTELEQEK		377.872	3	1130.59					74847.1		198760	4.13723e+06
U	MLPELFQDDEKALSPTSATSSGR		827.404	3	2479.19					164730		105340	6063846
U	NSLHLLMETLNATTPHYVR	Oxidation	557.289	4	2225.13			9008400		104550		171850
U	QVLSDLALQLYQQLVR		629.695	3	1886.06			74756000		1287400			46766154
U	AATLVLQSYLR		412.243	3	1233.71					68418.1		116240	1934154
U	QMFYLVGALTLNNLLLR	Gln->pyro-Glu	981.548	2	1961.08			3362200		93611			4189077
U	VLLLHLEEGKDLEYR		914.004	2	1825.99					79746.1		104660	4726000
U	LGELEVGQMENLSPGQLLDEPLRPVNLPR		1071.9	3	3212.69			35128000				303960	29041538
U	QGGSPMLEGVDDAK		702.327	2	1402.64			3.6536e+06				277510	3074615
U	GELAQAYLGLK		581.827	2	1161.64			5315800				238040	3851077
U	KVPLDMSLFLK	Oxidation	653.876	2	1305.74			8126400		117820			1735846
U	LGLLDLLDEECKMPK	Carbamidomethyl	591.976	3	1772.91			67668000		4004200		3479600
U	GAELEYESLKR		647.835	2	1293.66			13629800				421920	8834923
N	RAVQQLR		435.767	2	869.519			3586400				82567.1	1207354
U	GAELEYESLK		569.785	2	1137.56			19120400		662050			14934308
U	ALVYLQCCFR	Carbamidomethyl+Carbamidomethyl	443.886	3	1328.64			1.46312e+06				101410	2196923
U	LTNENLDLMEQLEKQDK		687.677	3	2060.01			19869400				457140	30029231
U	KVPLDMSLFLK	Oxidation	436.253	3	1305.74			13978600		178700			3511538
U	DKGELAQAYLGLK		703.388	2	1404.76			9110000		236920			6731077
U	LGELEVGQMENLSPGQLLDEPLRPVNLPR		804.179	4	3212.69			26356000				415730	21249231
U	QLELDLNDER	Gln->pyro-Glu	614.296	2	1226.58			1.09022e+07				742630	8.80108e+06
U	LFNWLVDHVNQALHSAVK		523.534	4	2090.11			303940000		1842200			231630769
U	HADYLNDDQKVR		737.358	2	1472.7			1155780		30824.1			935292
U	LATATETYLKPLSK		768.438	2	1534.86			4998600		142340			3746154
U	QVLSDLALQLYQQLVR	Gln->pyro-Glu	935.525	2	1869.04			73818000		1325000			104946154
U	DSPQLLMDAK	Oxidation	567.279	2	1132.54			11315000				176060	1349692
U	QQQLLAQNLQLPPEAR	Gln->pyro-Glu	610.667	3	1828.98			1.45342e+06				142560	2372769
U	QLNSFHSVMCQHGMDPELLK	Carbamidomethyl+Gln->pyro-Glu+Oxidation	790.694	3	2369.06			7560600		102530			4578769
U	GVAVNLLPGLPAYLLFMCVR	Carbamidomethyl	735.076	3	2202.21			55184000		364870			66816923
U	QETDQLVSNLKEENTLLK	Gln->pyro-Glu	695.695	3	2084.06			10951800				782770	15556923
U	KLGELEVGQMENLSPGQLLDEPLRPVNLPR	Phospho	856.194	4	3420.75			19000800				163610	16475385
U	LTNLEGVYNSETEK		532.93	3	1595.77			8518600				649650	6023077
U	QLNSFHSVMCQHGMDPELLK	Carbamidomethyl+Gln->pyro-Glu	785.362	3	2353.07			1.09846e+07				848910	39115385
U	QLELDLNDER		622.809	2	1243.6			1.13458e+07				744490	6976000
U	QEKETLNHR	Gln->pyro-Glu	379.86	3	1136.56			4.2788e+06		70928.1			2692615
U	VPLDMSLFLK		581.831	2	1161.65			4.932e+06		388730			2354000
U	LMQLQR	Oxidation	402.723	2	803.432			11435600		141830
N	TVGHQFR		422.725	2	843.435			3904800					1913692
N	EEVLLLR		436.266	2	870.517			5428400		203480
U	LHLGMENK	Oxidation	479.245	2	956.475			4116000					710477
U	EMTETMER	Oxidation	521.713	2	1041.41			1065120				42981.1
U	YLELGFDKR		570.806	2	1139.6			21004000					10861846
U	AKEEERPQLR		628.341	2	1254.67			593380					273400
U	KDSPQLLMDAK	Oxidation	421.22	3	1260.64			3647800					783923
U	DFQGMLEYKR		429.545	3	1285.61			6611200		236320
U	QVLSDLALQLYQQLVR	Gln->pyro-Glu	624.019	3	1869.04			5115000		80256
U	QVLSDLALQLYQQLVR		944.039	2	1886.06			16485000					9033077
U	QACTLLGLSESYQMGLFR	Carbamidomethyl+Gln->pyro-Glu	1029	2	2055.98			11340000					16746154
U	QACTLLGLSESYQMGLFR	Carbamidomethyl+Gln->pyro-Glu+Oxidation	1036.99	2	2071.97			18178000		208310
U	LFNWLVDHVNQALHSAVK		697.709	3	2090.11			105456000		683440
U	QETDQLVSNLKEENTLLK	Gln->pyro-Glu	1043.04	2	2084.06			6729800					5658154
U	QGGSPMLEGVDDAKEMAHTR	Gln->pyro-Glu+Oxidation+Oxidation	715.318	3	2142.93			3876400					350492
U	QLNSFHSVMCQHGMDPELLK	Carbamidomethyl+Gln->pyro-Glu+Oxidation+Oxidation	796.026	3	2385.06			3188400					934292
N	NPDLLVGENDLTALSYLHEPAVLHNLR		1005.2	3	3012.57			50606000					65076923
U	LGELEVGQMENLSPGQLLDEPLRPVNLPR	Oxidation	808.178	4	3228.68			6616600					1.61046e+06
U	LGELEVGQMENLSPGQLLDEPLRPVNLPR	Oxidation	1077.23	3	3228.68			7149400					1.67631e+06
U	KLGELEVGQMENLSPGQLLDEPLRPVNLPR	Oxidation	840.201	4	3356.78			24746000					6493385
U	KLGELEVGQMENLSPGQLLDEPLRPVNLPR	Oxidation+Phospho	860.193	4	3436.74			6076400					1.24891e+06
U	HLFPVTFPFNPSSLALETLQLPASLGLGFLAR		864.229	4	3452.89			13549000					9258923
U	HLFPVTFPFNPSSLALETLQLPASLGLGFLAR		1151.97	3	3452.89			14757000					7743231
U	QYSGEEGFMK	Gln->pyro-Glu	579.742	2	1157.47			7.561e+06		273670
U	QLMQDELDRK	Oxidation	431.215	3	1290.62	49646.1		951820
U	VPVKPTK		384.753	2	767.49							62231	204462
U	RYLCMQR	Carbamidomethyl	513.752	2	1025.49					44521.1			1401323
U	DTVFEEQLK		554.78	2	1107.54							254710	3288462
U	FPFTFDEKR		593.798	2	1185.58					55879.1			1498677
U	QGGSPMLEGVDDAK	Gln->pyro-Glu	693.814	2	1385.61							382760	4688923
N	LQQQFNMHVFK		710.364	2	1418.71							217250	4310923
U	VLASNPLMESLGNAK		515.276	3	1542.81							361030	5760308
U	LGLLDLLDEECKMPK	Propionamide	596.648	3	1786.92							105370	20001538
U	QNEHCLTNFDLAEYR	Gln->pyro-Glu+Propionamide	953.923	2	1905.83			1.13244e+06					3263538
U	VLMEQLTSVSEELDVRK		659.35	3	1975.03							178943	6440308
U	DDKNTMTDSTLLLEDVQK		1033.5	2	2064.99							229860	5329231
U	TDDDAEALCSMCNALTTAQLVK	Carbamidomethyl+Carbamidomethyl	809.699	3	2426.08					163890			3952462
U	KTDDDAEALCSMCNALTTAQLVK	Carbamidomethyl+Propionamide	857.07	3	2568.19		162490						2231538
U	VLENLLQPMLVSGMLEHETLQGVSGVKPTGLR		862.219	4	3444.85							884470	142310769
U	VLENLLQPMLVSGMLEHETLQGVSGVKPTGLR	Oxidation	866.218	4	3460.84							790790	24043077
U	LRNDVER		451.246	2	900.478			342840
U	DFQGMLEYK	Oxidation	573.76	2	1145.51			6275200
U	VLLLHLEEGK		384.233	3	1149.68			3272000
U	QYSGEEGFMK	Gln->pyro-Glu+Oxidation	587.74	2	1173.46			6540600
U	QGGSPMLEGVDDAK	Gln->pyro-Glu+Oxidation	701.811	2	1401.61			2746000
U	QGGSPMLEGVDDAK	Oxidation	710.325	2	1418.63			1345300
U	ETLEPLLQAAQLLQVK	Glu->pyro-Glu	888.517	2	1775.02			3270600
U	VLMEQLTSVSEELDVR	Oxidation	932.472	2	1862.93			2628600
U	QMFYLVGALTLNNLLLR	Gln->pyro-Glu+Oxidation	989.545	2	1977.08			9428600
U	GVAVNLLPGLPAYLLFMCVR	Carbamidomethyl+Oxidation	740.407	3	2218.2			26810000
U	EQLPWTLLDFYDNQPCLNLLESK	Carbamidomethyl	946.134	3	2835.38			13659600
U	KTDDDAEALCSMCNALTTAQLVK	Carbamidomethyl+Carbamidomethyl	852.398	3	2554.17					217380
U	KLVEETK		423.75	2	845.486							139490
U	NTMTDSTLLLEDVQK		854.427	2	1706.84								1780462
U	RTSSLADEGTYTLDSLLR		666.676	3	1997.01								2793231
U	GVAVNLLPGLPAYLLFMCVR	Carbamidomethyl	1102.11	2	2202.21								22372308
U	TDDDAEALCSMCNALTTAQLVK	Carbamidomethyl+Propionamide	814.371	3	2440.09								2828154
U	KTDDDAEALCSMCNALTTAQLVK	Propionamide+Propionamide	861.741	3	2582.2								1752615
U	KLGELEVGQMENLSPGQLLDEPLRPVNLPR		669.164	5	3340.78								2093538
	BSN_MOUSE|O88737	Protein bassoon
U	LVFSDASK		433.735	2	865.455	193830	81943.1	14384800	95175.1	533500	153060	1221700	1.20089e+07
U	QHVLQQQQEER	Gln->pyro-Glu	703.345	2	1404.67	105570	29891.1	30692000	39454.1	506520	102730	1248900	16340000
U	LLPGGAAEQAGK		556.309	2	1110.6	111080		19174400	121390	508610	91243.1	1060700	10290615
U	LTEAVSAFGK		511.779	2	1021.54	66940.1		21308000	94158.1	543770	100420	1272800	11682000
U	DPEPPEPLTFR		649.325	2	1296.63	117320		17254800	67071.1	515030	130290	1771600	11638923
U	TQGVVGPGPHEEQRPYPQGLPGR		614.816	4	2455.24	226650		60266000	96459	1524000	339990	4098200	41356923
U	LQPQSQPTTR		578.309	2	1154.6	116440		21146000	49479.1	472570	84836.1	1330300	10516154
U	LQEELER		458.74	2	915.466	102080		14395400	82794.1	344080	113970	1.5027e+06	8.66339e+06
U	YNLPNQVTPLAR		693.38	2	1384.75	212600		44158000	144270	1313100	253120	2858300	25683077
U	QFLADSTLR		525.783	2	1049.55	43935.1		6116600	27261.1	220200	19154.1	621930	4460462
U	YLELGLTQR		546.806	2	1091.6		52648.1	24444000	171550	675350	127340	2065100	16386154
U	LLDTSFASSER		613.307	2	1224.6		65010.1	34216000	173330	905760	173670	2667200	25520000
U	LGQLFQGPGR		536.799	2	1071.58	157170	61923.1	31228000		1114300	174660	2813700	20638462
U	AAGPPTPGLGPVPGPGPGPGPGSVPR		748.403	3	2242.19	149190		21602000		737660	148320	1555300	17863077
U	VSPQPPLSTKPSTAEPRPPAGEAQGK		657.6	4	2626.37	83006.1		3.1954e+07		964890	163200	2.1775e+06	24484615
U	SLAPAALSSK		472.774	2	943.534			13767000	41017.1	457450	49106.1	1277400	10277692
U	YYGVSSR		416.203	2	830.392	66159.1		8170000		270530	74440.1	683530	5.74277e+06
U	QAQFALQR		481.264	2	960.514	56831.1		8739800		335760	49693.1	795190	5359385
U	ATSVPGPTQATAPPEVGR		579.304	3	1734.89	43918.1		8.6474e+06		238080	72266.1	916230	5.19954e+06
U	LADSSVQTDDEEGEGR		854.369	2	1706.72	77290.1		17864800		360880	89883	1475500	14015538
U	SQGSFEYQDTQDHDYGGR		697.288	3	2088.84	42656.1		36288000		603690	101310	2582500	2.73138e+07
U	KQQEQLLQLER		471.6	3	1411.78	71672.1		27052000		634680	121950	1757400	15510769
U	KYGLALDPVSGR		425.907	3	1274.7	38680.1		13524600	47786.1	403740	47633.1		10974769
U	ATSVPGPTQATAPPEVGR		868.452	2	1734.89	104010		17769000		421610	84427.1	630220	8919231
N	QAELDEEEKELDAK	Gln->pyro-Glu	815.378	2	1628.74	83467.1		1.76858e+07		418360	58141.1	1.82e+06	17283077
U	HREEEQLLVQR		479.592	3	1435.75	247380		64224000	166980	1762000		2895400	33021538
U	SLSDPKPLSPTAEESAK		586.304	3	1755.89			7081200	58873.1	217630	53206.1	989020	7739846
U	SPQVLYSPVSPLSPHR		588.653	3	1762.94	99605.1		21398000		660270	149970	2261800
U	QAQFALQR	Gln->pyro-Glu	472.751	2	943.488			9434800	45405.1	305810	48774.1	731420
U	TLQVDSR		409.722	2	817.429			8742600		203950	34897.1	744710	6215538
U	EKPLSGGDSEVGAPQPSR		604.302	3	1809.89	86936.1		19042200		526730	95740.1		16004615
U	HSYSLGFADGR		605.286	2	1208.56			10843400		249070	66932.1	511590	4696308
U	QVEQAVQTAPYR		695.36	2	1388.7			8615800		184640	19696.1	462160	3665231
U	KAEMLQR		438.242	2	874.469			5726800		73567.1	23555.1	359220	2945385
U	AQGPSGQEAESPR		657.308	2	1312.6			7007400		141080	19606.1	411480	3414000
U	EAGPRPPGSGPGPGPTPGAK		595.308	3	1782.9	101950		33608000		797780		1814600	2.32584e+07
U	ELQELQTLK		551.311	2	1100.61	188120		37020000		980690		2866000	21958462
U	SQQQLHSPALSPAHSPAK		471.749	4	1882.96	46141.1		11222600		203900		589090	5992923
U	GGEAEEPVPKPYSQDLSR		653.653	3	1957.94			20002000		410900	68224.1	1540400	13214000
U	YLGQGLQYGSFTDLR		859.431	2	1716.85	80369.1		13468800		331230		1102400	12762462
U	GPANYNTCTACK	Carbamidomethyl+Carbamidomethyl	678.787	2	1355.56			10068000		222330	44151.1	745510	7270462
U	MASAYSGEK		472.213	2	942.412	9198.1		2547800		66098.1	14005.1	333160
U	FQDELTYGLKK		447.906	3	1340.7			9521800	42427.1	194080		536960	5797846
U	HPTDLLSHPLPLR		499.284	3	1494.83			6378600		136270	60291.1	774760	4923385
U	HGSGSGGPDLVQYQPQHGPGLSAPQGLAPLR		770.393	4	3077.54	89541.1		2.248e+07		719940		1576200	19630769
U	KQQEQLLQLER		706.896	2	1411.78			9303800		179330	37417.1	355250	4278308
N	QAAEMEELHR	Gln->pyro-Glu	598.772	2	1195.53	57521.1		9031200			91384.1	1438800	8864769
U	YSSVSNLYSDHR		476.557	3	1426.65		29768.1	23418000		967090	132740	2487400	20869231
U	GTAPAASQPAGKPQPGPTTAPGPQPAGPPR		920.479	3	2758.41	80607.1		15837200		475790		787230	8296154
U	QPLGKPEQER	Gln->pyro-Glu	582.804	2	1163.59			21094000		389390		1144200	12816462
U	QKGPQGLGQPSGSLPAK	Gln->pyro-Glu	816.939	2	1631.86			3021000		59110.1		169690	1967538
U	LSSVPGTSR		452.248	2	902.482			7024600		316330		802270	7029538
U	ASACPLCQAELNMGSR	Carbamidomethyl+Carbamidomethyl	882.895	2	1763.78			3096200		92419.1		315140	3097846
U	MGPGSGPGALAK		521.771	2	1041.53			8225200		234020		762160	8115231
U	QFLADSTLR	Gln->pyro-Glu	517.269	2	1032.52			5.038e+06		206850		522350	4952615
U	APSAYHHASESK		428.87	3	1283.59			2140800		32453.1		158730	1646000
U	TSDLTSTPSQPNFNTCTQCHNK	Carbamidomethyl+Carbamidomethyl	846.704	3	2537.09			7161600		136580		587600	5527385
U	SSVSQSPAPTYPSDSHYTSLEQNVPR		945.446	3	2833.32			10678200		227210		1.1475e+06	11228615
U	ADMTDEEFMRR		467.536	3	1399.59			3.5852e+06		204240		491520	3.74677e+06
U	QKAPFPATCEAPSR	Carbamidomethyl+Gln->pyro-Glu	771.872	2	1541.73			2741400		66255.1		156030	1813538
U	TQGVVGPGPHEEQRPYPQGLPGR		819.419	3	2455.24			4441000		146120		297570	2934923
U	GPHGGPSQPTGPR		415.543	3	1243.61			8438600		122160		422790	3.59492e+06
U	MGPGSGPGALAK	Oxidation	529.769	2	1057.52			7884600		165200		390150	1.47055e+06
N	QAAEMEELHR	Gln->pyro-Glu+Oxidation	606.769	2	1211.52			3683600		44214.1		155560	643277
U	LLEGSLGEPAPLPLPTPQQPPAGVPHR		923.508	3	2767.5			22128000		778380		1728800	18349231
U	SADCSVQTDDEDNADWEQPVRR	Carbamidomethyl	865.033	3	2592.08			5058800		161730		535250	5273077
U	QREQQDTAESSDDFGSQLR		732.997	3	2195.97			4850000		67652.1		486730	4022154
N	QAELDEEEKELDAK		549.597	3	1645.77			9.0738e+06		171870		947060	7455231
U	QHVLQQQQEER		474.908	3	1421.7			7394000		48458.1		375620	3515077
U	KGQPGYPSSADYSQSSR		605.615	3	1813.82			3972200		131590		270520	1923385
U	RLADSSVQTDDEEGEGR		621.949	3	1862.82			5877800		104590		445400	4254615
U	VSPALHLTAATDPK		474.265	3	1419.77			1.92288e+07		459890		1507600	13777692
U	TEWLCLNCQTK	Carbamidomethyl+Carbamidomethyl	726.834	2	1451.65			7710400		163150		683940	7346000
N	QAAEMEELHR		405.193	3	1212.56					115160	23282.1	325410	2463538
U	GTAPAASQPAGKPQPGPTTAPGPQPAGPPR		690.611	4	2758.41			12192400		455340		852340	7664769
U	APFPATCEAPSR	Carbamidomethyl	652.309	2	1302.6			2.4176e+06		107750		209080	1524031
U	SPGPPSPMVAQGTQTPHRPSTPR		596.554	4	2382.19			5917600		219950		549840	6241846
U	LLEGSLGEPAPLPLPTPQQPPAGVPHR		692.883	4	2767.5			6483800		288900		647150	6943077
U	DAAEEDERMYGSSSR		568.237	3	1701.69			3284600		135890		189960	4022769
U	ERVELEK		451.751	2	901.487		10296.1	1.09346e+07		255220		505070	1.36472e+07
U	GYMTPTSPAGSER	Oxidation	685.306	2	1368.6			3712800		82013.1		201050	935662
U	LYSSMSDTNLAEAGLNYHAQR	Oxidation	786.366	3	2356.08			9759800		162320		402950	2493385
U	RTDPATPVVKPVPEAPK		601.344	3	1801.01			14873000		277980		529500	7895385
U	QREQQDTAESSDDFGSQLR	Gln->pyro-Glu	727.321	3	2178.94			4923400		101060		606920	5.12708e+06
U	VCNQCGFNPNPHLTQVK	Carbamidomethyl+Carbamidomethyl	671.652	3	2011.94			19016400		414100		1141500	14754154
U	LQVCNLCGFNPTPHLVEK	Carbamidomethyl+Carbamidomethyl	709.356	3	2125.04			23640000		384580		1456800	18703077
U	TAVKPTPLLLTDQGMDLTSLAVEAR		880.814	3	2639.42			26096000		1025200		1494700	22683077
U	DYLSDSELNQLR		726.852	2	1451.69			10470600		204380		894900	7084000
U	QAHTGPSALQPK		412.223	3	1233.65			3346000		100740		203790	1312692
U	HEARPHPQASPAPAMQK		463.986	4	1851.92			5051800		120130		256860	2032308
U	GLGEHRDYLSDSELNQLR		701.347	3	2101.02			3326200		118510		203200	3502308
U	QAAPGPQQSQPPSSR		768.382	2	1534.75			2031400		73379.1		131190	1144292
U	ADTQAQPQMQGR		665.812	2	1329.61			3884000		105450		346970	2184462
U	HSYHDYDEPPEEGLWPHDEGGPGR		694.797	4	2775.16			5513400		143930		283180	3.29477e+06
U	YSSVSNLYSDHR		714.331	2	1426.65			2573200		61454.1		307350	1777231
U	FPFGSSCTGTFHPAPSAPDK	Carbamidomethyl	703.323	3	2106.95			2739400		92276.1		290380	2395692
U	QAHTGPSALQPK	Gln->pyro-Glu	609.317	2	1216.62			14115600	32906.1			640970	6860462
U	KKPDPLELGYQAHLPPESLSQLVSR		701.384	4	2801.51			3582600		81467.1		325760	3915231
U	SATTVPSGLGAGEQTQEGLTGK		697.018	3	2088.03			19156400		424390		2089100	12104769
U	LHSSPVSSTLTSK		448.577	3	1342.71			6394200		155720		433510	7.28477e+06
U	ALGMDMTTAPR		582.281	2	1162.55			4724400		335620		868930	5643385
U	LYSSMSDTNLAEAGLNYHAQR		781.034	3	2340.08			10171000		376910		1213000	12818615
U	HPTDLLSHPLPLRR		413.74	4	1650.93			8562000		193290		606740	3.79815e+06
U	LRDACEPESGPDPSTVR	Carbamidomethyl	629.295	3	1884.86			7.5134e+06		215490		516860	5013692
U	GYMTPTSPAGSER		677.309	2	1352.6			3575200		138860		641240	4859077
U	GSTPTSPYSVPQLAPLPSSTLCPLCK	Carbamidomethyl+Carbamidomethyl	920.131	3	2757.37			3716200		178220		828720	5496000
U	GQPGYPSSADYSQSSR		843.871	2	1685.73			1.42652e+06		31859.1		117390	1306169
U	GPQGLGQPSGSLPAK		697.375	2	1392.74	101800		2.6096e+07	43914.1	729000			18096923
U	QPQTQQQQQQQQQQQGLGQQAPQQAPSQAR	Gln->pyro-Glu	846.411	4	3381.62	67242.1		9162400		321720			4613846
U	YLSAPEK		404.216	2	806.417			7.83092e+06	45921.1	281140	78660.1		9177385
U	SPGPPSPMVAQGTQTPHRPSTPR	Oxidation	600.553	4	2398.18			4021600		118610		120650	1.11505e+06
U	NVYEQQR		468.73	2	935.446			1915460				223560	1102585
U	DSAVDLSSLK		517.772	2	1033.53					478370		1778800	13146154
U	ALGMDMTTAPR	Oxidation+Oxidation	598.276	2	1194.54			1806400		23584.1		75635.1
U	QQEQLLQLER	Gln->pyro-Glu	634.336	2	1266.66			4706800				196490	2172462
U	ADKYGPGPMGPK		406.538	3	1216.59					76564.1		220630	2108615
U	QQGQVAGAR	Gln->pyro-Glu	449.23	2	896.446			746520				118620	733308
U	QAAPGPQQSQPPSSR	Gln->pyro-Glu	759.868	2	1517.72			3848600		111170		271220
U	QPVVYGDPFQSR		696.849	2	1391.68					145080		329450	2932923
U	SAEEAYEDMMR		666.266	2	1330.52			3714600				709230	4168000
U	LQEELERER		601.312	2	1200.61			2936800				115560	2034615
U	SQQQLHSPALSPAHSPAK		628.662	3	1882.96			1702160				80126.1	1.18117e+06
U	RYSSVSNLYSDHR		528.59	3	1582.75			1574020				86169.1	1.02919e+06
U	NYVMLDDLSELTK		770.882	2	1539.75			7838400				825610	9529385
U	LHSSPVSSTLTSK		672.362	2	1342.71			1.53958e+06				81815.1	1266215
U	AQGPSGQEAESPRR		490.575	3	1468.7			2586800				123230	1279415
U	DACEPESGPDPSTVR	Carbamidomethyl	808.846	2	1615.68			2684400				292230	2146615
U	SPSVSPDR		422.712	2	843.409			1261060				231930	949600
U	DLLLTQMGTAQGVGLKPGPVPEPGAEPHR		742.145	4	2964.55			7123800		222850			7034154
U	AMSSVGLQTLSDCSVQTEPEQLPR	Carbamidomethyl	878.423	3	2632.25			2.4024e+06				424420	4571538
U	LPHNATTGYEELLSEAGPAEPTDSSGALQGGLR		835.409	4	3337.61			2.5166e+06				521110	4662923
U	QPLGKPEQER		394.547	3	1180.62			2923400				95014.1	1.57902e+06
U	YGLALDPVSGR		574.309	2	1146.6					250220		623480	4024462
U	QTSLADLEQK	Gln->pyro-Glu	558.283	2	1114.55			4.9492e+06		104060		564580
U	AEPVPKPPPETTVPPGTPK		647.023	3	1938.05			9553400		330970			5914769
U	VGSSLRPSLEAQAVAPSAEWSKPPR		655.851	4	2619.38			17175000		494990			21636923
U	GEEESEEDSYDPR		771.297	2	1540.58			4525200				406590	2720923
N	DYPPLR		380.703	2	759.391			5.00102e+06				282204	3.35477e+06
U	LADSSVQTDDEEGEGR		569.915	3	1706.72			1.00844e+06				254120	1.49171e+06
U	SPSTSSTLHSYGQPPTTANYGSQTEELPHAPSGPPGSGR		985.211	4	3936.82			2.9516e+06				371160	4669231
U	SSCSEYSPSPSLDSEAETLDGGPTR	Carbamidomethyl	877.045	3	2628.11			3.7686e+06				674290	7296154
U	HDATASSSTTAAATAR		506.91	3	1517.71			1342680				119870	647877
U	HSDSGSDSKHDATASSSTTAAATAR		605.523	4	2418.06			2963600				139750	2139538
U	APSAYHHASESK		642.802	2	1283.59			128750				19670.1	148380
U	MCAALNSMDQYGGR	Carbamidomethyl	787.331	2	1572.65			3716200				526980	4373077
U	ASACPLCQAELNMGSR	Carbamidomethyl+Carbamidomethyl+Oxidation	890.892	2	1779.77			2868200		35648.1			579077
U	TAVKPTPLLLTDQGMDLTSLAVEAR	Oxidation	886.146	3	2655.42			11571600		210170			2177692
U	RQLLEMSAEEDNLEEDDTAVSGR		869.733	3	2606.18			2.1338e+06				264920	2237385
U	LPHNATTGYEELLSEAGPAEPTDSSGALQGGLR		1113.54	3	3337.61			3.9522e+06				314600	4064000
U	DSTPTASESQR		589.768	2	1177.52			459100				120570	572954
U	GLPSSASDMSLQTEEQWEAGR		760.346	3	2278.02			2.1636e+06				444790	2673385
U	ASQPVAESTPAGLGAAVYEELLQTSQSLAR		1015.52	3	3043.55			39872000				665680	43333846
U	NYVMLDDLSELTK	Oxidation	778.879	2	1555.74			3456200				147860	796000
U	YGPGPMGPK	Oxidation	460.221	2	918.427			1274700		38258.1			394123
U	LQLEQLQQLQQQLQLQLEEQK		869.476	3	2605.41			1.23342e+08				1571900	38693846
U	TLPSPPPEEAHLPLAGQVPSQLYAASLLQR		795.932	4	3179.7			3.0942e+07				557660	8813692
U	RLLEGSLGEPAPLPLPTPQQPPAGVPHR		731.908	4	2923.6			4821800		131400			5410154
U	RTDPATPVVKPVPEAPK		451.26	4	1801.01			5.9534e+06				324210	3551846
U	SLSDPKPLSPTAEESAK	Phospho	612.959	3	1835.86			2.372e+06				281010	1564154
U	ADMTDEEFMR		622.75	2	1243.48					103490		638770	2925692
U	RDLLLTQMGTAQGVGLKPGPVPEPGAEPHR	Oxidation	628.336	5	3136.65			7208400		137720			1672308
U	YLGQGLQYGSFTDLR		573.29	3	1716.85			2.5122e+06				463180	2240462
U	LSSHDYSSR		526.244	2	1050.47			546280					484938
U	ALGMDMTTAPR	Oxidation	590.278	2	1178.54			5986000		61985.1
U	QVEQAVQTAPYR	Gln->pyro-Glu	686.846	2	1371.68			11433400		335110
U	EEPFSTTAPAVLK		695.367	2	1388.72			2867000		60926.1
U	APSAYHHASESKK		471.569	3	1411.68			448900					414292
U	ASARPRPESSQEPK		513.934	3	1538.78			536000					283354
U	MCAALNSMDQYGGR	Carbamidomethyl+Oxidation	795.329	2	1588.64			2782400					474569
U	HDYVEDSSEGGLSPLPPQPPAR		783.377	3	2347.11			2958200		122970
U	RDLLLTQMGTAQGVGLKPGPVPEPGAEPHR		781.17	4	3120.65			4843200					4817385
U	LEPLGPGGVSGRPGKDPGEPAVLEGPTLPCCYGR	Carbamidomethyl+Carbamidomethyl	873.187	4	3488.72			9149000					8.27031e+06
U	RLPHNATTGYEELLSEAGPAEPTDSSGALQGGLR		874.434	4	3493.71			10882600				952570
U	LPHNATTGYEELLSEAGPAEPTDSSGALQGGLRR		874.434	4	3493.71					250620			7671846
U	DLGFTEDK		462.719	2	923.424			3.2482e+06				331280
U	DPGEPAVLEGPTLPCCYGR	Carbamidomethyl+Carbamidomethyl	696.656	3	2086.95							376480	1.16062e+06
U	TLPSPPPEEAHLPLAGQVPSQLYAASLLQR		1060.91	3	3179.7							332200	6106154
U	QQTLPRPMK	Gln->pyro-Glu	541.295	2	1080.58			1.50994e+06				187990
U	AGSKPSSLSMAHGR		462.57	3	1384.69			739660					684077
U	SLSDPKPLSPTAEESAKER	Phospho	708.007	3	2121					63032.1			1636462
U	SADCSVQTDDEDNADWEQPVR	Carbamidomethyl	813	3	2435.98							359010	2375231
U	SHGPLLPTLEDSSEEEELREEEELLR		759.872	4	3035.46							473390	5833692
U	QPQTQQQQQQQQQQQGLGQQAPQQAPSQAR		850.668	4	3398.64					268360			3072462
U	GEHSSTLPASTPSYTSGTSPTSLSSLEEDSDSSPSRR		950.186	4	3796.71					98195.1			3881692
U	SGSEYNLPAFMSLYSPTETPSGSSTTPSSGRPLK		884.174	4	3532.67							194160	3021077
U	FQDELTYGLK		607.309	2	1212.6					129430
U	ADMTDEEFMR	Oxidation	630.747	2	1259.48			1875020
U	KYGLALDPVSGR		638.356	2	1274.7			3161800
U	HREEEQLLVQR		718.884	2	1435.75			2107000
U	DAAEEDERMYGSSSR	Oxidation	573.569	3	1717.68			1876640
U	HEARPHPQASPAPAMQK	Oxidation	467.985	4	1867.91			1703460
U	QTSLADLEQK		566.796	2	1131.58			5.1728e+06
U	TAVKPTPLLLTDQGMDLTSLAVEAR		660.862	4	2639.42							208960
U	APSAGTDGPLALYGWGALPAENLSLCR	Carbamidomethyl	919.794	3	2756.36							3895600
U	VTQHFAK		415.73	2	829.445								520877
U	ASPQAKPLR		484.288	2	966.561							22563.1
U	HHGGHTVSSSQK		421.206	3	1260.6								99994
U	LQLEQLQQLQQQLQLQLEEQKQR		964.196	3	2889.57								26210769
U	LQLEQLQQLQQQLQLQLEEQKQR		723.399	4	2889.57								26132308
U	REEGYMLDDSHCVVSDSEAYHLGQEETDWFDKPR	Carbamidomethyl	820.959	5	4099.76								3770308
U	EAPVAPAPGPAPAPPPGQKPAGEAVAGSGSGVLSRPASEKEEASQEDR		921.063	5	4600.28			2.748e+07					19463077
U	AEPVPKPPPETTVPPGTPKAK	Phospho	444.436	5	2217.14				70343.1
	MAP1B_MOUSE|P14873	Microtubule-associated protein 1B
U	FSPEVPGQK		494.759	2	987.503	91462.1		63740000	42387.1	1386900	80294.1	499560	6528615
U	ALGNLELGLR		528.314	2	1054.61	343070		136758000	177980	3472100	182020	1070100	12722923
U	HNLQDFLNLK		621.335	2	1240.66	96026.1		73442000		1415400	81177.1	634250	5663231
U	DLTGQVPTPPVK		626.351	2	1250.69	110580		57530000	52457.1	1101700	64709.1	440020	4.464e+06
U	TPEVSGYTYEK		637.301	2	1272.59	89335.1		91894000	49308.1	1360900		516060	7519385
U	SVNFSLTPNELK		674.859	2	1347.7	151430		1.21482e+08	79410.1	1.938e+06		813110	10196154
U	LSMKPEPLFR		406.562	3	1216.66	53308.1		51820000		1023000	48002.1	461090	5224462
U	SVGNTLEPVLLFQK		515.628	3	1543.86	44658.1		28858000		632300	40097.1	375580	3359231
U	STPLSDTK		424.722	2	847.429			7538400	4870.1	127410	22881.1	215798	1.50708e+06
U	ASAELDLKDVSDER		516.59	3	1546.75	94722.1		68996000		1.1495e+06	82402.1	474330	5886462
U	LAELEEER		494.751	2	987.487	34790.1		24794000	34223.1	337230		196390
U	STGFLPLKEDFGPEK		555.623	3	1663.85	80465.1		26186000		437970		263910	2080000
U	ADSRESLKPATKPVASK	Phospho	466.994	4	1863.95	61125.1		53474000		928350		186670	4.184e+06
U	KLAELEEER		372.868	3	1115.58			31166000		397100	15329.1	207270	2.87477e+06
U	TPQASTYSYETSDR		803.355	2	1604.7			52804000		659390	47660.1	318150	5273385
U	LKETQPGEAYVLQK		535.294	3	1602.86	45455.1		38208000		486150		290460	2401077
U	SVGNTLEPVLLFQK		772.938	2	1543.86			94942000	77049.1	1987600		644310	10089077
U	SLEEACFTLQYLNK	Carbamidomethyl	572.615	3	1714.82			1.47606e+07	45503.1	386770		123320	1839077
U	MSLSEGTVSDK		577.274	2	1152.53			27596000		368650	37059.1	320270	4435385
N	LSKPCCYLFPGGR	Carbamidomethyl+Carbamidomethyl	518.923	3	1553.75	46212.1		24648000		321030		730730	6.02045e+06
N	AVLDALLEGK		514.803	2	1027.59		58198.1	70886000	89114	555670	137900	4575600	56915385
U	EWYQETHEK		417.188	3	1248.54	45778.1		1.2754e+07		67702.1		471110	5.47369e+06
U	ETAAAHQASSSPPLDAATAEPYGFR	Phospho	875.725	3	2624.15			20424000		389000		158730	2045077
U	HLDRVDSLLLTHLGDDNLPGLNSMLQR		761.4	4	3041.57			105138000		1.2949e+06		52221.1	9953538
U	TPEDGGYTCELTEK	Carbamidomethyl	800.346	2	1598.68			33918000		500770		243830	4184769
U	ETAAAHQASSSPPLDAATAEPYGFR		849.07	3	2544.19			47524000		793130		317710	5968154
U	ESKEETPEVTK		426.214	3	1275.62			12619600		109290		74391.1	932846
U	SVSPGVTQAVVEEHCASPEEK	Carbamidomethyl+Phospho	774.01	3	2319.01			71192000		816780		427490	5256000
U	DFEELKAEELDVAK		545.942	3	1634.8	73492.1		25052000	32528.1	515690
U	SDLSPLTPR		493.269	2	984.524			44892000		1055400		608360	4374462
U	EEQSPVKAEVAEK		481.916	3	1442.73			15098000		184520		95007.1	1337892
U	TLKSPCDSGYSYETLEK	Carbamidomethyl+Phospho	686.631	3	2056.87			14116600		221100		82559.1	1.07554e+06
U	HLDFLKQPLATQK		513.628	3	1537.86	84840.1		33104000		765380			2776000
U	THDVGGYYYEK		444.535	3	1330.58			59458000		815880		412150	5593846
U	ESLKPATKPVASK		452.601	3	1354.78	67048.1		42902000		448840			3394923
U	LEMYVLNPVK		603.334	2	1204.65			63912000		1.1352e+06		601230	8590615
U	SWDTNLLECNLDQELK	Carbamidomethyl	659.979	3	1976.91			33116000		618420		424090	4708154
U	RSESPFEGK		518.757	2	1035.5			23642000		315020		58966.1	1080369
U	TSDVETMSSQSALALDER	Oxidation	652.634	3	1954.88			16102200		119010		69428.1	697123
U	ETQPGEAYVLQK		681.849	2	1361.68			18456800		163460		143080	966354
U	LTSFPESESYSYETSTK		978.441	2	1954.87			17319400		293780		104660	2012462
U	TLKTPEDGGYTCELTEK	Carbamidomethyl+Phospho	674.631	3	2020.87			19507400		204540		108490	1285123
U	VLFPGNSTQYNLLEGLEK		1011.53	2	2021.05			170092000		3723600		215300	12496308
U	TTEAAATAVGTAATTAAVVAAAGLAASGPVK		890.815	3	2669.42			209120000		6074200		1296500	18406154
U	SQGSTSNSDWMK		664.283	2	1326.55			7762600		185590		179750	1932000
U	EEGYEPDKTEAEDYVMAVADK		797.018	3	2388.03			8609800		193450		252520	2.12154e+06
U	THDVGGYYYEK		666.299	2	1330.58			12231800		336370		72187.1	1.24395e+06
U	SPSLSPSPPSPLEK		711.877	2	1421.74			7690600		189310		108200	1.18812e+06
U	VLFPGNSTQYNLLEGLEK		674.69	3	2021.05			159918000		3533100	232930	659440	10692308
U	HSPTEDDESAKAEADVHLK		520.496	4	2077.96			102386000		935050		227300	5.66277e+06
U	NLLSPDLGVVFLNVPENLKDPEPNLK		958.859	3	2873.55			354620000		4439400		2478600	38666154
U	NLLSPDLGVVFLNVPENLKDPEPNLK		719.396	4	2873.55			97798000		1.2253e+06		814770	1.20625e+07
U	EMQYFMQQWTGTNK		896.395	2	1790.78			11772400		274730		118300	2.19154e+06
U	SVSPGVTQAVVEEHCASPEEK	Carbamidomethyl	747.355	3	2239.04			33982000		644170		316510	6698615
U	LSMKPEPLFR	Oxidation	411.894	3	1232.66			26430000		257590		107790	583431
U	SSYYVVSGNDPAAEEPSR		643.294	3	1926.86			15458800		42917.1		735670	6.22154e+06
U	TTTTPEVK		438.737	2	875.46			5362800		36967.1		386940	3080615
U	NVDVEFFKR		577.304	2	1152.59			4384800		31249.1		56050.1	2.70923e+06
U	NVDVEFFKR		385.205	3	1152.59			12948400		65549.1		283240	9788615
U	ASAELDLK		423.732	2	845.449			7003600		124670		91718.1
U	TTRSPDTSAYCYETMEK	Carbamidomethyl+Phospho	707.283	3	2118.83			7210200		132390			824462
U	DFEELKAEELDVAK		818.409	2	1634.8			13210800		277320			1.00054e+06
U	DAYCSEEKELK	Carbamidomethyl	686.308	2	1370.6			8784200		154270			999046
U	EVSSKEEQSPVK		449.565	3	1345.67			7099200		106080			810692
U	QPGLQSPSR		485.259	2	968.504			2811200		52000.1		30192.1
U	KLAELEEER		558.798	2	1115.58			6316400		64221.1		39213.1
U	SPCDSGYSYETLEK	Carbamidomethyl	818.346	2	1634.68			38262000		671590			4518462
U	SWDTNLLECNLDQELK	Carbamidomethyl	989.465	2	1976.91			23148000		394220			2717538
U	QPGLQSPSR	Gln->pyro-Glu	476.746	2	951.477			4893600				43341.1	506938
U	HNLQDFLNLK		414.559	3	1240.66			19293600		339040			1.79831e+06
U	DLTTSSVEK		490.251	2	978.487	61410.1		40166000		695210
U	SPPLLGSESPYEDFLSADSK		1070.01	2	2138.01			11558600		195880			1521200
U	SSHLPTEVTEKPQAVPVSFEFSEAKDENER		847.664	4	3386.63			47288000		384130			5826000
U	SPSLSPSPPSPLEK	Phospho	751.861	2	1501.71			5115200		77799.1			574338
U	SLEEACFTLQYLNK	Carbamidomethyl	858.419	2	1714.82			21692000		466340			2989692
U	VQSLEGEKLSPK		438.914	3	1313.72			11859200		336550			1.69923e+06
U	DLKPQLELLEDEEK		566.965	3	1697.87	64218.1		32804000		476340	61499.1
U	TPEEGGYSYELSEK		794.854	2	1587.69			45636000		686680			5.38769e+06
U	SPDTSAYCYETMEK	Carbamidomethyl	841.34	2	1680.66			13453000		191930			1607385
U	VQSLEGEKLSPK	Phospho	697.85	2	1393.69			11219600		119280			492492
U	DLKPQLELLEDEEKLK		647.358	3	1939.05			19898200		141180			923662
U	TTRTPEEGGYSYELSEK	Phospho	676.293	3	2025.86			23920000		314110			1616308
U	TESKPSVTEKEVSSK		545.953	3	1634.84			4641400		73551.1			476846
U	HSPTEDDESAKAEADVHLK	Phospho	540.488	4	2157.92			5396600		84105.1			478908
U	LTSFPESESYSYETSTK		652.63	3	1954.87			3102400		44350.1		85074.1
U	ESSPLYSPGFSDSTSAAK		915.923	2	1829.83			19095800		430110			3710923
U	SSMLFDTMQHHLALNR		634.31	3	1899.91			19761400		835500			5052462
U	LGGDVSPTQLDVSQFGSFKEDTK		819.071	3	2454.19			11676800		282780		358940
U	SSHLPTEVTEKPQAVPVSFEFSEAKDENER		678.333	5	3386.63			143328000		1090800			1.69323e+07
U	AETEEAEEPEEDGEDNASGSASK		794.318	3	2379.93			5482600				84679.1	1215908
U	TSDVETMSSQSALALDER		970.449	2	1938.88			14179400		254590			2576769
U	SDVLETVVLLNPSDEAVSTEVR		791.411	3	2371.21			7.40278e+07		1713200			5.25369e+06
U	QSPDHPTLGASVLHLTENGPTEVDYSPSDLQDSSLSHK	Gln->pyro-Glu	1011.23	4	4040.89			8113800		153080			3.41e+06
U	KLGGDVSPTQLDVSQFGSFK		704.032	3	2109.07			7335600		134450			1.63862e+06
U	SPPLLGSESPYEDFLSADSK		713.676	3	2138.01			8724800		123460			1.34399e+06
U	TLEVVSPSQSVTGSAGHTPYYQSPTDEK		989.14	3	2964.4			14758600		213430			4132308
U	ATVVVEATEPEPSGSLGNPAASTSPSLSHR	Acetyl	997.495	3	2989.46			19042400		657320			4.91415e+06
U	YESSLYSQEYSKPAVASFNGLSEGSK		943.447	3	2827.32			16319200		375480			3366615
U	EWYQETHEK		625.278	2	1248.54			2379200				68998.1	1225046
U	SSYYVVSGNDPAAEEPSR		964.437	2	1926.86			2.7436e+07				553850	11666923
U	AQWGSNMQVTLLPTHDSEVMR		800.719	3	2399.14			10213000				112860	9673846
N	HLDFLK		386.721	2	771.428			70144000		602110
U	LMLTDAAR	Oxidation	453.739	2	905.464			25290000		207250
U	ESVVSGDDR		482.223	2	962.431			902840					295523
U	SRTPVQDHR		548.286	2	1094.56			73870			211660
U	RSESPFEGK	Phospho	558.74	2	1115.46			2359000					183108
U	MSLSEGTVSDK	Oxidation	585.271	2	1168.53			6132600		42715.1
U	RALGNLELGLR		404.579	3	1210.71			8647200		151120
U	LSMKPEPLFR		609.339	2	1216.66			6797400		112790
U	LEMYVLNPVK	Oxidation	611.331	2	1220.65			31164000		142690
U	EMSLYASLASEK		664.824	2	1327.63			40514000		839580
U	ESLKPATKPVASK	Glu->pyro-Glu	446.598	3	1336.77			1099360		26017.1
U	EMSLYASLASEK	Oxidation	672.821	2	1343.63			32854000		210650
U	SQGSTSNSDWMK	Oxidation	672.28	2	1342.55			3291600					155969
U	ESLKPATKPVASK		678.398	2	1354.78			1497280					126886
U	DLKPQLELLEDEEK		849.943	2	1697.87			5235200		47168.1
U	QDVDLCLVSSCEFK	Carbamidomethyl+Carbamidomethyl	850.387	2	1698.76			4820400		63072.1
U	ADSRESLKPATKPVASK	Phospho	622.322	3	1863.95			3713200		69959.1
U	SSMLFDTMQHHLALNR		475.984	4	1899.91			20222000		853880
U	ESSPLYSPGFSDSTSAAK	Phospho	955.906	2	1909.8			4425800		66767.1
U	DLKPQLELLEDEEKLK		485.77	4	1939.05			27140000		251710
U	AAEAGVTEEQYGYLGTSAK		648.978	3	1943.91			23217380		445280
U	AAEAGVTEEQYGYLGTSAK		972.963	2	1943.91			40944000		828550
U	FYLLVVVGETVTEEHLR		668.698	3	2003.07			39070000					3.96739e+06
U	ASLSPMDEPVPDSESPVEK		1007.47	2	2012.92			5263600		101570
U	KTSDVETMSSQSALALDER		690	3	2066.98			8319200		127500
U	HSPTEDDESAKAEADVHLK		693.659	3	2077.96			5344400					336015
U	KLGGDVSPTQLDVSQFGSFK	Phospho	730.687	3	2189.04			12606800		170680
U	ESVVSGDDRAEEDMDDVLEK		746.662	3	2236.96			5288200		132440
U	ESPVSDLTSTGLYQDKQEEK		752.029	3	2253.06			4922800		99108.1
U	GEAEQSEEEGEEEDKAEDAR	Phospho	772.959	3	2315.86			2497400				70713.1
U	AQWGSNMQVTLLPTHDSEVMR	Oxidation	806.051	3	2415.13			7027600				129710
U	VDSLLLTHLGDDNLPGLNSMLQR		841.107	3	2520.3			90554000					11709692
U	VDSLLLTHLGDDNLPGLNSMLQR	Oxidation	846.439	3	2536.3			21982000		215760
U	TTEAAATAVGTAATTAAVVAAAGLAASGPVK		668.363	4	2669.42			36134000		807830
U	DVMSDETNNEETESPSQEFVNLTK	Phospho	941.723	3	2822.15			8970000		112450
U	DVMSDETNNEETESPSQEFVNLTK		915.068	3	2742.18			6980200					2.05692e+06
U	TLEVVSPSQSVTGSAGHTPYYQSPTDEK		742.107	4	2964.4			4398800		139420
U	HLDRVDSLLLTHLGDDNLPGLNSMLQR		609.322	5	3041.57			46604000		673740
U	TLEVVSPSQSVTGSAGHTPYYQSPTDEK	Phospho	1015.8	3	3044.37			4979400					722308
U	ATVVVEATEPEPSGSLGNPAASTSPSLSHR	Acetyl+Phospho	1024.15	3	3069.43			6370400					1.07605e+06
U	TTEAAATAVGTAATTAAVVAAAGLAASGPVKELEAER		850.201	4	3396.77			55728000		1.139e+06
U	TPGDFNYAYQKPENAAGSPDEEDYDYESQEK		890.125	4	3556.47			10705400		118210
U	TPGDFNYAYQKPENAAGSPDEEDYDYESQEK	Phospho	910.116	4	3636.44			9326600					911169
U	TPEVSGYTYEKTER		553.934	3	1658.78			1.74734e+06		137450
U	VLSPLR	Phospho	382.707	2	763.399			2710200
U	QPLATQK	Gln->pyro-Glu	384.716	2	767.418			2323200
U	AEADVHLK		441.738	2	881.461			2072600
U	LMLTDAAR		445.742	2	889.469					1005900
U	NVDVEFFK		499.253	2	996.492			20994000
U	SDLSPLTPR	Phospho	533.252	2	1064.49			9656200
U	TESKPSVTEK		553.29	2	1104.57			919500
U	LSMKPEPLFR	Oxidation	617.337	2	1232.66			2809600
U	ESKEETPEVTK		638.817	2	1275.62			1237020
U	EVSSKEEQSPVK		673.844	2	1345.67			957200
U	HMDPPPAPMQDR	Oxidation+Oxidation	475.208	3	1422.6			1443020
U	EEQSPVKAEVAEK		722.37	2	1442.73			1071800
U	ASLTLFCPEEGDWK	Carbamidomethyl	826.885	2	1651.76			44812000
U	STGFLPLKEDFGPEK		832.93	2	1663.85			3546400
U	DKPVKTESKPSVTEK		418.983	4	1671.9			1501920
U	MGVGKLEMYVLNPVK	Oxidation	565.305	3	1692.89			3926400
U	SPDTSAYCYETMEK	Carbamidomethyl+Oxidation	849.337	2	1696.66			7491000
U	EMQYFMQQWTGTNK	Oxidation	904.393	2	1806.77			5729200
U	EMQYFMQQWTGTNK	Oxidation	603.264	3	1806.77			5809000
U	EMQYFMQQWTGTNK	Oxidation+Oxidation	608.596	3	1822.77			2732200
U	EMQYFMQQWTGTNK	Oxidation+Oxidation	912.39	2	1822.77			3329600
U	SSMLFDTMQHHLALNR	Oxidation	639.642	3	1915.9			16369800
U	SSMLFDTMQHHLALNR	Oxidation	479.983	4	1915.9			26752000
U	SSMLFDTMQHHLALNR	Oxidation+Oxidation	644.973	3	1931.9			7693400
U	TSDVETMSSQSALALDER	Oxidation	978.447	2	1954.88			9814000
U	TSDVETMSSQSALALDERK	Oxidation	695.332	3	2082.97			5531800
U	TTRSPDTSAYCYETMEK	Carbamidomethyl+Oxidation+Phospho	712.615	3	2134.82			5259000
U	ASLSPMDEPVPDSESPVEK	Phospho+Phospho	1087.44	2	2172.86			3523000
U	ESVVSGDDRAEEDMDDVLEK	Oxidation	751.994	3	2252.96			2317400
U	ESVVSGDDRAEEDMDDVLEK	Phospho	773.317	3	2316.93			2741800
U	EEGYEPDKTEAEDYVMAVADK	Oxidation	802.349	3	2404.03			5508600
U	AQWGSNMQVTLLPTHDSEVMR	Oxidation+Oxidation	811.383	3	2431.13			5710400
U	SSHLPTEVTEKPQAVPVSFEFSEAK		686.85	4	2743.37			5299000
U	DVMSDETNNEETESPSQEFVNLTK	Oxidation	920.399	3	2758.18			5437400
U	VLSPLRSPPLLGSESPYEDFLSADSK	Phospho	962.139	3	2883.39			130594000
U	VLSPLRSPPLLGSESPYEDFLSADSK	Phospho+Phospho	988.794	3	2963.36					633510
U	HLDRVDSLLLTHLGDDNLPGLNSMLQR	Oxidation	765.399	4	3057.57			20270000
U	HLDRVDSLLLTHLGDDNLPGLNSMLQR	Oxidation	612.521	5	3057.57			8949600
U	QGVDDLEKFEDEGAGFEESSETGDYEEK	Gln->pyro-Glu	1041.43	3	3121.27			5231600
U	LLDDLSNGYDDTEDGGHTLGDCSYSYETTEK	Carbamidomethyl	1157.48	3	3469.43			15724000
U	RLLDDLSNGYDDTEDGGHTLGDCSYSYETTEK	Carbamidomethyl	907.389	4	3625.53			9456800
U	DKAELLLPNGQEVDLPLSYLTSVSSLLVWHPANPAEK		1011.79	4	4043.13			89116000
U	KSTPLSDTK		488.769	2	975.524
U	HMDPPPAPMQDR	Oxidation	469.876	3	1406.61
U	AELLLPNGQEVDLPLSYLTSVSSLLVWHPANPAEK		951.008	4	3800
U	EDQPEEFTATSGYTQSTLELSSEPTPMDEMSTPR	Glu->pyro-Glu+Phospho+Phospho+Phospho+Phospho+Phospho+Phospho+Phospho+Phospho+Phospho	1124.09	4	4492.32
U	TPEDGGYSCELTEK	Propionamide	800.346	2	1598.68			33918000		500770		243830
U	LLDDLSNGYDDSEDGGHTLGDPSYSYETTEKLTSFPESEGYSYETSTK	Phospho+Phospho+Phospho+Phospho+Phospho+Phospho+Phospho	1172.82	5	5859.04
	CLH1_MOUSE|Q68FD5	Clathrin heavy chain 1
U	LAAYLFK		413.247	2	824.48	77356.1	55898.1	64588000		105420	72692.1	911790	6491077
U	VANVELYYK		549.795	2	1097.58	94470.1	92694.1	107336000		250760	121890	1387900	11534154
U	AYEFAER		443.209	2	884.403	49535.1	51907.1	39126000		97937.1	49333.1	702890
U	LAELEEFLNGPNNAHLQQVGDR		822.079	3	2463.21	107690	76119.1	78780000		87861.1	111560	1.2261e+06	13459077
U	NLLLVVR		413.779	2	825.544	47392.1		38770000		60595.1	71614.1	619010	5538923
U	NNRPSEGPLQTR		456.904	3	1367.69	50600.1		49712000		91174.1	81784	742500	6973846
U	LASTLVHLGEYQAAVDGAR		657.681	3	1970.02	101000		120656000		228100	121370	2017000	19592308
U	LSGETLFVTAPHEATAGLLGVNR		785.088	3	2352.24	177080		96954000		243290	155220	1382200	15325538
U	LYLDSNNNPER		667.82	2	1333.63	78035.1		74592000		170510	83139	1273100	10128308
U	ENPYYDSR		522.225	2	1042.44	22214.1		25998000		61199.1	22545.1	527880	3988154
U	ALEHFTDLYDLKR		405.965	4	1619.83	115920		72956000		147620	106180	775250	10152154
U	LLLPWLEAR		555.837	2	1109.66			270160000		619610	277110	1655500	23061538
U	NLQNLLLLTALK		677.427	2	1352.84			255260000		729200	232660	1920200	22310769
U	NNLAGAEELFAR		652.833	2	1303.65	100610		85346000		244440	127900	1631200
U	LVLDNSVFSEHR		472.581	3	1414.72			97848000		200650	140730	1966600	16287692
U	LLYNNVSNFGR		648.838	2	1295.66			109802000		204890	132270	1.7774e+06	14013846
U	VVGAMQLYSVDR		669.348	2	1336.68			41744000		114070	66886.1	961140	6588923
U	AVNYFSK		414.716	2	827.418			46528000		104270	49681.1	640580	5447692
U	YLELYVQK		528.292	2	1054.57	96550.1		73572000	25143.1		74629.1	959120	8802923
U	LHLLEVGTPPTGNQPFPK		649.023	3	1944.05	199970		97148000		213900		1370300	13740308
U	HSSLAGCQLLNYR	Carbamidomethyl	506.921	3	1517.74	68324.1		50104000		91479.1		732930	6.17631e+06
U	KFNALFAQGNYSEAAK		586.965	3	1757.87			115520000		152390	83153.1	1.6555e+06	15569231
U	LHEGCEEPATHNALAK	Carbamidomethyl	592.949	3	1775.83	25531.1		31260000		54445.1		225600	3256000
U	LHEGCEEPATHNALAK	Carbamidomethyl	444.964	4	1775.83			85334000		135680		952480	11787385
U	AQLLPLR	Acetyl	426.769	2	851.523		30782.1	25496000				358740	2890462
U	TSLDAYDNFDNLSLAQR		648.31	3	1941.91			39392000		105220		1.0826e+06	7019231
U	KVGYTPDWLFLLR		536.636	3	1606.89	95653.1		135768000				500610	15907692
U	ALEHFTDLYDLK		488.917	3	1463.73			24016000		49751.1		477370	2390000
U	RDPHLACVAYER	Carbamidomethyl	496.245	3	1485.71			19596200			27938.1	166970	1.85708e+06
U	VGEQAQVVLLDMNDPSNPLR	Oxidation	737.707	3	2210.1	245790	746400	13196400		130570
U	TLQLFNLEMK		618.836	2	1235.66			36708000			53307.1	1027600	8867538
U	HDVVFLLTK		536.313	2	1070.61	26492.1		51316000				666060
U	DAMQYASESK		565.245	2	1128.48			10712800				300500	1450662
U	YLQMAR		391.205	2	780.395			22766000			28814.1	416180
U	DPHLACVAYER	Carbamidomethyl	444.212	3	1329.61			16291200				240500	1.64262e+06
U	ESNCYDPER	Carbamidomethyl	585.23	2	1168.45			13804200				277590	1993846
U	QLPLVKPYLR	Gln->pyro-Glu	605.371	2	1208.73			27014000				326510	3.73846e+06
U	QSVELCKK	Carbamidomethyl+Gln->pyro-Glu	487.752	2	973.49			13238000				134930	2.03677e+06
U	VDKLDASESLR		411.554	3	1231.64			40104000				601260	4418154
U	GQFSTDELVAEVEK		776.38	2	1550.75			16263200				350890	2.72692e+06
U	QLPLVKPYLR		409.592	3	1225.75			9900600		29438.1			1363969
U	LEKHELLEFR		438.579	3	1312.71			32942000				258720	2534000
U	SVNESLNNLFLTEEDYQALR		785.72	3	2354.14			187848000				1054100	13622308
U	RPLSADSALMNPASK		519.94	3	1556.8			25200000				695560	4.95e+06
U	GQCDLELLNVCNENSLFK	Carbamidomethyl+Carbamidomethyl	718.338	3	2151.99			18591600				529140	3.61385e+06
U	SVDPTLALSVYLR		717.404	2	1432.79			53732000			99522.1		5000769
U	AHLAQLCEK	Carbamidomethyl	535.277	2	1068.54			28324000				178570	3076308
U	VLQCFAETGQVQK	Carbamidomethyl	754.382	2	1506.75			47136000				341390	4062615
U	EALDSYLK		469.745	2	937.476	30467.1		5.1852e+07				710670	5367385
U	KVSQPLEGHAASFAQFK		615.66	3	1843.96			24962000				200700	3.08262e+06
U	KFDVNTSAVQVLLEHLGNLDR		592.821	4	2367.25			230040000				563970	33593846
U	AMLSANLR		438.242	2	874.469			27786000				940110	9.58923e+06
U	EKVGEQAQVVLLDMNDPSNPLR		818.088	3	2451.24			6459400				178580	2.50892e+06
U	KDPELWGSVLLESNPYR		668.346	3	2002.02			11699600				264660	2481231
U	KAVDVFFPPEAQNDFPVAMQLSEK		903.119	3	2706.34			27640000				184970	1866308
U	YGYLHLYDLETGTCLYMNR	Carbamidomethyl	794.701	3	2381.08			22881240			27292.1		4567231
U	HNLMDFAMPYFLQVMK	Oxidation+Oxidation	672.984	3	2015.93			3781200	478900	184468		58553.1
U	RPLSADSALMNPASK	Oxidation	525.272	3	1572.79			25564000		31943.1			822262
U	KQLLEK		379.742	2	757.47			3234200				1.1519e+07	45196923
U	YLQMAR	Oxidation	399.202	2	796.39			7205000				40882.1
U	YLQAACK	Carbamidomethyl	427.215	2	852.416			9536800				249080
U	VMEYLNR		462.734	2	923.453			31576000			51282.1
U	VMEYLNR	Oxidation	470.731	2	939.448			15933400				158640
U	HELLEFR		472.253	2	942.492	10233.1		35290000
U	DAMQYASESK	Oxidation	573.243	2	1144.47			3490400					102274
U	EGQFKDLLTK		393.552	3	1177.63			25088000		85552.1
U	EVCFACVDGK	Carbamidomethyl+Carbamidomethyl	592.757	2	1183.5			54386000		51805.1
U	VDKLDASESLR		616.828	2	1231.64			5329800					492538
U	CNEPAVWSQLAK	Propionamide	708.851	2	1415.69			6343400					2576308
U	AHTMTDDVTFWK		484.559	3	1450.66			19428600				423950
U	VVGAMQLYSVDRK		489.266	3	1464.78			24070000					6452769
U	ESYVETELLFALAK		806.927	2	1611.84			65516000					3.92646e+06
U	ALEHFTDLYDLKR		540.951	3	1619.83			32510000				421780
U	FNALFAQGNYSEAAK		815.897	2	1629.78			6817600					868600
U	AHMGMFTELALLYSK		571.29	3	1710.85			10717600					994185
U	YESLELCRPVLQQGR	Carbamidomethyl	616.653	3	1846.94			31360000					5233077
U	TSLDAYDNFDNLSLAQR		971.961	2	1941.91			53440000				375670
U	AFMTADLPNELLELLEK		974.011	2	1946.01			171550000					32889231
U	AFMTADLPNELLELLEK		649.676	3	1946.01			82374000					20807692
U	LPVVLGGLLDVDCSEDVLK	Carbamidomethyl	1021.05	2	2040.08			141732000				512690
U	LPVVLGGLLDVDCSEDVLK	Carbamidomethyl	681.034	3	2040.08			106972000					1.43523e+07
U	GQCDLELLNVCNENSLFK	Carbamidomethyl+Carbamidomethyl	1077	2	2151.99			11225600					1843538
U	VGEQAQVVLLDMNDPSNPLR		732.376	3	2194.11			11431400					2.86723e+06
U	LSGETLFVTAPHEATAGLLGVNR		589.068	4	2352.24			4969400					1.41489e+06
U	YHEQLSTQSLLELFESFK		733.704	3	2198.09			217180000		132770
U	KFDVNTSAVQVLLEHLGNLDR		790.092	3	2367.25			138174000					24144615
U	RPLLDQVVQTALSETQDPEEVSVTVK		961.177	3	2880.51			232160000					48329231
U	LDNYDAPDLANLALSNELFEEAFALFR		1024.5	3	3070.49			1864640					8077538
U	TPDTLRR		429.743	2	857.472			429900
U	QSVELCK	Carbamidomethyl	432.218	2	862.422			4201800
U	YLQAACK	Propionamide	434.223	2	866.432			1596020
U	AMLSANLR	Oxidation	446.239	2	890.464			14977600
U	RLAAYLFK		491.298	2	980.581			3373800
U	QSVELCKK	Carbamidomethyl	496.266	2	990.517			457680
U	EGQFKDLLTK	Glu->pyro-Glu	387.549	3	1159.62			1993320
U	EGQFKDLLTK		589.824	2	1177.63			8768200
U	EHLELFWSR		406.208	3	1215.6			11365000
U	TLQLFNLEMK	Oxidation	626.834	2	1251.65			43918000
U	VVGAMQLYSVDR	Oxidation	677.345	2	1352.68			22908000
U	NLQNLLLLTALK		451.954	3	1352.84			17718000
U	LVLDNSVFSEHR		708.367	2	1414.72			11184000
U	SVDPTLALSVYLR		478.605	3	1432.79			6705800
U	AHTMTDDVTFWK		726.335	2	1450.66			7925600
U	ALEHFTDLYDLK		732.872	2	1463.73			3934000
U	AHTMTDDVTFWK	Oxidation	734.332	2	1466.65			3242000
U	AHTMTDDVTFWK	Oxidation	489.891	3	1466.65			8293400
U	WLLLTGLSAQQNR		750.42	2	1498.83			9811600
U	WLLLTGLSAQQNR		500.616	3	1498.83			2637600
U	MREHLELFWSR		501.922	3	1502.75			17232400
U	VLQCFAETGQVQK	Carbamidomethyl	503.257	3	1506.75			17983000
U	MREHLELFWSR	Oxidation	507.254	3	1518.74			12619000
U	LTDQLPLLLVCDR	Carbamidomethyl	778.429	2	1554.84			10252600
U	LTDQLPLLLVCDR	Carbamidomethyl	519.289	3	1554.84			2665400
U	RPLSADSALMNPASK		779.406	2	1556.8			3251600
U	RPLSADSALMNPASK	Oxidation	787.404	2	1572.79			1522420
U	ALEHFTDLYDLKR		810.923	2	1619.83			3111800
U	FDFVHDLVLYLYR		567.3	3	1698.88			35624000
U	GQFSTDELVAEVEKR		569.956	3	1706.85								15690769
U	AHMGMFTELALLYSK	Oxidation	576.621	3	1726.84			5504600
U	AHMGMFTELALLYSK	Oxidation+Oxidation	581.953	3	1742.84			7633400
U	KFNALFAQGNYSEAAK		879.944	2	1757.87			11409800
U	YESLELCRPVLQQGR	Carbamidomethyl	924.475	2	1846.94			2103600
U	MEGNAEESTLFCFAVR	Carbamidomethyl	930.916	2	1859.82			3704400
U	MEGNAEESTLFCFAVR	Carbamidomethyl+Oxidation	938.914	2	1875.81			5635800
U	LHLLEVGTPPTGNQPFPK		973.031	2	1944.05			5185400
U	AFMTADLPNELLELLEK	Oxidation	982.008	2	1962			103624000
U	AFMTADLPNELLELLEK	Oxidation	655.008	3	1962			72990000
U	LASTLVHLGEYQAAVDGAR		986.018	2	1970.02			6404800
U	HNLMDFAMPYFLQVMK		662.321	3	1983.94			30086000
U	HNLMDFAMPYFLQVMK	Oxidation	667.653	3	1999.94			27384000
U	HNLMDFAMPYFLQVMK	Oxidation+Oxidation+Oxidation	678.316	3	2031.93			2330400
U	GYFEELLTMLEAALGLER	Oxidation	691.019	3	2070.03			4966000
U	GYFEELLTMLEAALGLER	Oxidation	1036.02	2	2070.03			1338980
U	DTELAEELLQWFLQEEK		1061.02	2	2120.03			8777800
U	DTELAEELLQWFLQEEK		707.684	3	2120.03			25394000
U	GQCDLELLNVCNENSLFK	Carbamidomethyl+Propionamide	723.01	3	2166.01			3182200
U	VGEQAQVVLLDMNDPSNPLR		1098.06	2	2194.11			4649400
U	YHEQLSTQSLLELFESFK		1100.05	2	2198.09			16924200
U	DTELAEELLQWFLQEEKR		759.718	3	2276.13			77208000
U	EKVGEQAQVVLLDMNDPSNPLR	Oxidation	823.42	3	2467.24			4888600
U	ADDPSSYMEVVQAANASGNWEELVK		904.082	3	2709.22			66144000
U	ADDPSSYMEVVQAANASGNWEELVK	Oxidation	909.413	3	2725.22			21278000
U	SFEGLFYFLGSLVNFSQDPDVHFK		931.79	3	2792.35			25714000
U	SFEGLFYFLGSLVNFSQDPDVHFK		699.094	4	2792.35			7973400
U	LLEMNLMHAPQVADALLGNQMFTHYDR		782.883	4	3127.5								1.92985e+07
U	LAQMCGLHLVVHADELEELLNYYQDR	Carbamidomethyl	783.134	4	3128.51			89464000
U	LLEMNLMHAPQVADALLGNQMFTHYDR	Oxidation	786.882	4	3143.5			69938000
U	LLEMNLMHAPQVADALLGNQMFTHYDR	Oxidation+Oxidation	790.881	4	3159.49			32146000
U	LLEMNLMHAPQVADALLGNQMFTHYDR	Oxidation+Oxidation+Oxidation	794.88	4	3175.49			7681800
U	FQSVPAQPGQTSPLLQYFGLLLDQGQLNK		1063.23	3	3186.67			63106000
U	KGQVLSVCVEEENLLPYLTNVLQNPDLALR	Carbamidomethyl	1142.28	3	3423.81			47666000
U	KGQVLSVCVEEENLLPYLTNVLQNPDLALR	Carbamidomethyl	856.959	4	3423.81			34324000
U	AVVHTHLLNPEWLVNYFGSLSVEDSLECLR	Carbamidomethyl	875.194	4	3496.74			90158000
U	CNEPAVWSQLAK	Carbamidomethyl	701.843	2	1401.67
U	VGYTPDWLFLLR		740.403	2	1478.79
U	LAQMCGLHLVVHADELEELLNYYQDR	Carbamidomethyl+Oxidation	787.132	4	3144.5
U	GQFSTDELVAEVEKR		854.431	2	1706.85
	MACF1_MOUSE|Q9QXZ0	Microtubule-actin cross-linking factor 1
U	SSQLDQALVK		544.801	2	1087.59	620330	711330	248340	327560	387790	1.12021e+06	1023000
U	EQYEVLQER		597.293	2	1192.57	522850	658290		258230	425430		708130	2908462
U	RGEELLGR		465.262	2	928.509			3273600		302800	19315.1	709850	3.91569e+06
U	NDVLAHQATVATVNK		527.618	3	1579.83			2.4424e+06		202260	24297.1	955810	4478462
U	LAELSQR		408.732	2	815.45			1.52656e+06	18596.1	37180.1		568020	2938000
U	NLDLER		380.203	2	758.392			48840000	79778.1	699220		2640700	59460769
U	LTGQLESLER		573.312	2	1144.61			3653600		298160		945320	4652308
U	VEDFYR		414.698	2	827.381			1.006e+06		111950		297750	1.26726e+06
U	LETQYCK	Carbamidomethyl	471.223	2	940.432			1269440		102470		330480	1.40154e+06
U	TGTVQVLK		423.258	2	844.502			2.13004e+06		96959		527517	2.32077e+06
U	LSEGEKEQLSEQLR		549.285	3	1644.83			3183600		389810		1060500	5219692
U	AFVESQQK		468.743	2	935.471			845480		58507.1		273400	1404446
U	TSQLFLAK		454.266	2	906.517			2504400		217290		639960	3101538
U	LSPQELTALR		564.325	2	1126.63			2.122e+06		195390		712690	2.37323e+06
N	NDDLTDGNPK		544.746	2	1087.48			606080		60463.1		221680	675892
U	LANSEPVGTQTAK		658.346	2	1314.68			1397860		108050		447730	2184308
U	SSLEATHDMVTR		449.55	3	1345.63			1.52736e+06		111390		519370	2318615
U	EALEMASR		453.721	2	905.428			650140		73614.1		259670	1.04812e+06
N	VMDFFR		407.699	2	813.384			949880		141510		552330	2097231
N	FFLGNQFGDSQQLR		552.942	3	1655.81			843040		75380.1		515490	1.912e+06
U	LLSDTVGQR		494.775	2	987.535			1.98188e+06		131940		758700	3.00892e+06
U	NTQGTTTSSHTSASADLEK		645.968	3	1934.88			1963800		199740		770040	4239385
U	LSGQSALSTQPEAVK		758.404	2	1514.79			1.97182e+06		324410		730610	4111846
U	VLAQLETR		465.274	2	928.534			2642400		227760		967640	3635538
U	TLDVLVR		408.253	2	814.491			1.2875e+06		141000		463220	1.82646e+06
U	DQEPLPQNLDR		662.828	2	1323.64			3660200		281130		858320	3893538
U	SLENEDKEETLAK		502.582	3	1504.73	74646.1		3980400		281100		892900	5.86846e+06
U	VPEGGEGLSATEVDSR		801.884	2	1601.75			959720		150790		329470	1.34506e+06
U	FLDVLELAEK		588.829	2	1175.64			2557000		195540		741240	3110154
U	NCDVQGLEHDMDELNTR	Carbamidomethyl	682.627	3	2044.86			1.30492e+06		121380		525140	2324769
U	GQLQELSTR		516.278	2	1030.54			2.4884e+06		193810		869520	4245077
U	QTQALRDELQK	Gln->pyro-Glu	656.846	2	1311.68			3076800		174660		716050	3508923
U	LQPSFEALKR		396.896	3	1187.67			925180		93819.1		230500	1.44794e+06
U	FQVEQLGENKYR		504.26	3	1509.76			1.49896e+06		143210		260390	2415231
U	LSQEEAVPADLSALESHR		651.329	3	1950.96			4.7782e+06		496410		1243800	10102154
U	MENQLSASKPTGGLPETAR		663.002	3	1985.98			2.7182e+06		289870		923420	5432923
U	MQEDLNSR		496.727	2	991.439			379640		34151.1		225490	772708
U	AFSLDLLR		467.771	2	933.528			3392800		248160		574120	3700308
U	VDELDAALQR		565.296	2	1128.58		36787.1	1.79504e+06		175500		639650	2.26969e+06
U	GELFSTCGEEQK	Carbamidomethyl	692.806	2	1383.6			1.38668e+06		121070		350380	1854154
U	FQQLQLQQQEK		709.375	2	1416.74			3007800		178820		890710	3057538
U	SLQDTAEVLSLENHPAK		617.986	3	1850.94			3.093e+06		399240		1424100	7600000
U	AKEELYNQLLDK		488.596	3	1462.77			1.92908e+06		188630		919450	3164154
U	TEQSVALLEQK		623.338	2	1244.66			3745800		209350		774130	3133538
U	LAEQEHTQEDLQHLR		616.306	3	1845.9			1.62598e+06		104280		344000	1172785
U	LAQSAELADREK		444.237	3	1329.69			3.0392e+06		280110		774110	5882154
U	NSVFSVLDEELTK		740.88	2	1479.75			87146.1		122530		447640	2.27123e+06
U	DTDSLQSQLEDVR		753.358	2	1504.7					254920		542490	3517077
U	GALPDDTEALQSLLDTHKEFMK		615.559	4	2458.2					160950		477560	3.51215e+06
U	KGHFSSLELVPPSTLTTTHLK		574.069	4	2292.25					111900		269540	1778000
U	LLSDTVASDPGVLQQQLATTK		729.062	3	2184.16					271850		976570	5875846
U	TSLAGDTSNSSSPASTGAK		869.908	2	1737.8					106500		480290	3072462
U	LQCQLQENEEFQK	Carbamidomethyl	847.396	2	1692.78					223740		286630	2318154
U	VAQKELEEAVTSALQQETEK		744.385	3	2230.13					99731.1		152370	1830462
U	NLLVSVQSR		508.298	2	1014.58					178750		538750	3026000
U	LLLEECEQR	Carbamidomethyl	595.298	2	1188.58					140590		692050	3436308
U	TLQNQLVELR		607.349	2	1212.68			2297000		293450		975900
U	LECTNLYR	Carbamidomethyl	534.761	2	1067.51					183890		452880	2356769
U	YADLTLTSSK		549.787	2	1097.56					475550		1110900	4998615
U	ENLEQAFEVAER		717.847	2	1433.68			2582200		137720		561160
U	GGSSPEALNSLLK		636.843	2	1271.67					98376.1		533330	2.67862e+06
N	ALCDYR	Carbamidomethyl	399.184	2	796.354			757760				311820	2.22769e+06
[truncated: 27,611 more rows]

## Sheet: mb_CL47_Abundancenorm
mouse brain, CL-47			Related to Figure 1C
Abundancenorm values calculated from peakvolumes
TUC = affinity purification with a target unrelated control antibody
	anti-M7a	anti-M7b	anti-M7c	anti-M7d	TUC1	TUC2	TUC3	TUC4
1433B	2627	345	223233	338	1343	2515	9948	120068
1433E	648	580	84012	442	695	622	12487	166197
1433F	2413	1122	202308	665	1001	2877	12987	177280
1433G	6433	1923	461406	869	2261	4818	35233	821290
1433T	205	189	47788	168	538	657	3668	46514
1433Z	8536	4545	659415	2789	5530	10590	38409	801577
2AAA	675	587	41270	429	1502	1880	14569	260305
A2MG	855	557	617	350	67	609	64	312
AAK1	70	61	936	52	81	183	816	6217
AAKG1	175	163	17560	127	181	363	456	4298
AAPK1	149	133	1441	89	142	138	990	1429
AATM	268	238	17580	182	264	1201	2059	11637
ABCD3	571	469	5674	375	563	494	11378	55380
ABCE1	366	337	5272	282	405	374	8561	74457
ABCF1	214	164	3150	277	228	194	1237	12173
ABCF2	842	767	66577	766	1614	779	14353	285355
ABD12	604	531	10180	526	622	672	409	149383
ABHD6	432	405	4091	344	516	454	702	122261
ABHEB	190	187	10184	151	186	264	47	1353
ABHGA	458	392	5583	323	540	464	624	51323
ABI1	385	330	6208	238	372	358	25866	74929
ABLM1	106	92	15358	81	126	96	1813	21548
ABLM2	311	293	103257	232	360	329	3217	26529
ABLM3	220	170	43948	118	718	195	2980	33365
ACACA	21	19	255	13	22	21	26	3376
ACAD8	202	176	14001	204	264	198	387	6621
ACBG1	323	310	4536	524	373	331	2667	70476
ACD10	96	88	9714	75	115	97	219	13161
ACLY	138	142	2224	140	158	156	205	17318
ACON	1665	1033	43650	229	597	1746	5450	52700
ACOT9	946	775	49462	841	1202	825	11588	124457
ACSL3	630	400	10887	312	490	443	3238	72456
ACSL6	1894	1099	166130	780	2477	1169	24308	408031
ACTB	1925	1740	3742126	1458	31168	12692	212917	7335399
ACTC	3978	3143	38439	1924	4871	5136	499	10171546
ACTG	6664	6525	5139480	5720	7946	10554	147154	11404166
ACTN1	617	518	40602	458	1691	592	8900	115696
ACTN2	121	107	1618	100	157	114	117	12682
ACTY	2071	2243	1262684	1834	2394	2487	75567	6528551
ACTZ	8288	1406	1170955	1201	11746	7252	76752	8968514
ADA22	408	358	4335	349	355	384	4392	107851
ADA23	366	332	4004	301	422	363	390	60023
ADDA	10192	4754	147625	3988	7296	4874	85561	2835299
ADDB	1049	295	3876	316	583	306	9098	53504
ADDG	1991	1674	43001	1203	3943	2150	19883	2188283
ADT1	2810	1872	442736	1463	2690	2145	71188	394947
ADT2	2130	1316	196763	1257	1429	3411	30421	17091
AFG31	365	381	59906	308	418	402	271	3634
AFG32	3978	3880	4051517	3484	4507	4111	15446	44386
AG10B	585	579	39329	523	648	600	650	125180
AGAP1	109	91	1511	106	148	96	1957	10211
AGAP2	2763	728	912446	2263	44040	2992	102649	936183
AGAP3	365	297	111491	225	929	426	9414	110315
AGFG1	634	503	128582	602	1226	655	12185	155694
AGFG2	134	117	22109	103	158	124	2052	39001
AGO2	512	357	36358	300	531	546	611	94923
AHI1	270	241	7074	228	345	255	2559	54960
AHNK	231	13	135	7	14	12	13	134
AHNK2	8	7	1130	5	8	8	9	89
AHSA1	59	49	21272	60	474	54	78	7029
AINX	148633	7945	3277831	3421	204754	9612	227212	3097535
AJM1	2417	1292	596967	1706	11043	2514	15793	350456
AKAP5	276	129	2309	125	200	149	376	28789
AKAP9	389	269	86233	322	2879	368	457	4906
AKIB1	105	95	12796	87	132	107	582	10020
AL1B1	276	246	52966	199	289	275	323	3429
AL3A2	189	168	2240	127	200	190	207	36667
ALBU	249640	273373	464785	107011	66064	275545	12192	68125
ALDH2	260	219	113391	268	338	240	7177	22520
ALDOA	4654	4526	387046	1835	2501	7409	21445	274422
ALG2	1460	1430	164857	1117	1844	1417	6712	1095519
AMD	213	167	45331	162	251	241	386	25318
AMOT	46	37	1030	27	45	41	57	7333
AMPD2	591	518	10526	397	588	1069	1064	175449
AMPH	71	60	675	49	68	60	1067	6263
ANK1	24	23	245	22	28	25	26	2362
ANK2	1161	510	113483	610	7630	1147	7295	177248
ANK3	376	257	30232	169	1483	449	3760	64334
ANM5	212	184	2776	171	225	201	273	29286
ANO8	96	89	971	76	121	97	2104	17547
ANR63	1043	485	69926	16078	2394	4722	10643	99446
ANS1B	499	280	137355	365	1096	541	6556	108686
AP1B1	2714	885	217338	5014	2435	2967	21073	924694
AP2A1	15320	8793	3080899	28535	45157	18370	234043	7154122
AP2A2	13121	9269	1717008	24414	30187	18485	214466	5385232
AP2B1	34240	18092	4956214	57999	78818	39943	426599	13436558
AP2M1	20582	10717	4196611	22154	42482	17043	279614	10709548
AP2S1	30290	19878	5352858	21145	80857	33821	51696	3686949
AP3B2	268	261	3510	376	286	274	5862	26933
AP3D1	644	557	9380	1478	818	775	8899	54701
AP3M1	106	92	1402	70	111	94	998	4177
AP3M2	524	533	30881	522	274	258	7308	61333
AP3S1	387	262	9026	130	945	783	1835	1275
APC	80	70	5982	70	129	81	720	11296
APOD	4801	468	20565	2778	511	2345	896	4189
AR6P1	1014	908	9125	757	1043	1248	225	220486
ARAF	83	67	1064	50	81	75	898	1077
ARC1A	467	478	23313	319	587	502	2200	83707
ARF4	679	668	92210	539	1070	594	344	120411
ARF6	1865	1429	207654	1254	1654	4164	3500	155408
ARFG1	136	129	6761	131	157	142	2445	22958
ARG33	610	496	291471	1023	4590	556	7313	128995
ARHG2	3559	1080	302986	847	5713	1227	34938	1903190
ARHG7	773	698	109948	555	1760	1109	48270	121118
ARHGB	471	441	5818	388	561	470	19430	6824
ARL15	76629	26422	87115	3035	1562	1242	1042	14116
ARL8B	763	747	69858	783	851	821	768	11955
ARP10	1022	895	113974	780	1213	991	6557	1068928
ARP2	157	124	33304	92	347	301	3326	46816
ARP3	321	281	23522	216	471	293	600	40862
ARP5L	392	393	35972	383	905	410	397	4409
ARPC2	451	138	6164	106	156	143	1858	44839
ARPC4	2808	819	89864	634	3533	3197	2927	87473
ASCC3	9	9	114	8	13	9	12	985
ASPH	77	73	437	60	88	84	86	19903
ASSY	785	742	120248	698	863	806	8471	184725
ASTRA	197	173	2229	146	221	189	1096	18734
ASTRB	786	479	97766	380	4481	820	6821	125951
AT131	79	64	672	88	96	69	259	6885
AT1A1	8250	5262	17958	1946	3183	9554	11244	151017
AT1A2	4673	2744	7712	612	1632	5519	6925	112382
AT1A3	37188	26735	257488	5254	12620	49907	55641	785425
AT1B1	13907	12217	167434	1167	9911	16991	29526	505488
AT2A2	8485	3636	379032	5156	10136	6937	87318	3377665
AT2A3	3526	3134	40640	34	2516	3273	4435	331781
AT2B1	1740	1804	6043	461	474	1212	13051	121892
AT2B2	10172	4498	101866	843	3962	4629	31894	175637
AT2B3	346	248	5395	179	587	402	4378	47278
AT2B4	268	124	6776	123	180	146	346	20087
AT5F1	542	282	43955	216	789	796	6353	45180
AT8A1	57	52	1464	37	56	54	193	6458
ATAD1	315	294	38050	229	326	493	52	2449
ATAD3	753	708	144323	3707	3168	1447	55802	174321
ATAT	271	225	9552	72	267	225	1726	20545
ATGA1	257	240	77539	262	335	402	53	2380
ATLA1	1524	839	85990	598	1645	1535	7233	534724
ATLA2	71	64	3416	60	95	69	91	16665
ATPA	45950	12676	6565053	19580	33446	26223	518821	10337919
ATPB	4572	3361	315553	1463	4177	5446	75407	469845
ATPD	764	691	77771	682	978	756	10254	8584
ATPG	5869	2742	295340	1441	3777	3380	165029	2501729
ATPO	4252	1409	182038	1313	4803	9428	57913	546935
ATX2	160	143	10088	216	308	151	1835	33457
ATX2L	438	372	12976	276	636	1039	6117	76535
AUXI	88	82	7775	70	117	88	1509	5655
B3A3	242	218	12926	163	245	237	1318	20485
BAF	2644	2691	620130	883	3114	2853	229	49416
BAG2	720	605	122022	573	996	646	3763	574158
BAG5	774	741	30182	656	1326	777	3362	274719
BAIP2	584	542	109119	436	2437	540	8618	86920
BAP31	445	359	2498	151	233	385	559	73846
BASI	151	239	5565	116	249	271	2025	20144
BCAS1	41	35	2574	118	50	36	1121	10662
BCKD	240	240	17608	157	235	245	235	28932
BCLF1	236	71	7889	105	396	710	127	928
BCR	243	204	17205	107	291	232	3490	18669
BDH	2202	1745	41989	1484	1163	1813	47497	303768
BEGIN	267	212	60633	170	215	221	1556	15972
BIP	14071	5246	449508	4987	7084	9031	87687	1838936
BORG4	123	115	1367	121	143	125	142	11178
BORG5	133	134	1353	129	151	136	1555	37520
BRAF	75	68	820	48	148	70	1200	10258
BRI3B	1066	466	106970	496	582	501	2698	204021
BRSK1	269	241	17406	865	277	552	5638	49730
BSCL2	361	318	4395	266	437	363	437	99348
BSN	3500	1735	878588	2640	23108	3827	67741	612401
BTBDA	158	141	47433	108	898	146	3910	22487
BTBDH	4985	1147	184805	37131	2856	2465	19722	173589
C170B	2080	842	396740	1787	3951	923	296680	114476
C1QA	10432885	1460013	4507914	10755	356642	573274	2159103	1604318
C1QB	8167734	1341005	3371882	14504	307936	404198	2419809	2476666
C1QC	7826153	1774478	3953705	11047	488791	1216120	1557787	1650921
C1TM	117	118	12153	113	131	120	84	775
C2C2L	68499	29	1644583	48075	170295	47565	462245	17275974
CA2D1	596	147	17204	125	978	983	238	19984
CAC1A	3102	1340	101105	1764	3523	7185	14354	112489
CAC1B	150	131	1730	152	30	102	165	15235
CACB1	110	111	4427	107	125	1507	3844	24651
CACB3	1412	244	2797	269	360	1089	3761	32643
CACB4	4193	329	133726	4030	5189	6945	22782	181085
CACO1	626	469	83106	438	877	547	5158	133890
CADH2	329	245	235025	198	385	351	3141	49409
CALU	217	183	2606	149	214	177	3281	2698
CALX	3491	820	35863	1742	928	2536	10002	607505
CAMKV	1323	549	47026	55	2945	2648	15196	104867
CAMP1	16	14	1249	13	21	62	86	1191
CAMP2	60	47	1012	35	57	53	95	5014
CAMP3	1215	1070	88983	1213	1531	1243	14370	157240
CAPON	1033	814	67027	567	1935	883	133132	75974
CAPR1	12384	6927	138639	381583	17351	49855	33203	6529659
CAPS1	102	91	1303	89	102	95	2075	8015
CAPZB	3682	920	259008	2847	4628	2224	52727	1734618
CARL2	154	133	1620	72	175	141	5951	4200
CASP	195	179	30824	163	257	197	220	2037
CASPE	2337	1065	11540	600	3008	3393	4314	4962
CAZA1	696	621	48226	523	813	661	2834	246749
CAZA2	1048	1027	673468	1473	3614	2487	38838	1997519
CBLN1	162	1370	15155	133	1209	488	905	55829
CBPE	301	272	106868	275	401	624	986	4450
CC136	41	42	432	42	48	122	118	14421
CC177	3842	2231	683618	4526	16258	13159	48151	562368
CCD47	641	605	7076	263	387	666	285	131884
CCSAP	342	287	14323	249	398	302	3524	41242
CD5L	229	228	14732	172	2471	236	6093	8938
CDC42	4754	1284	115048	804	1103	4286	9229	300120
CDIPT	461	418	13381	404	522	441	382	150586
CDK12	30	27	333	19	29	28	59	6489
CDK17	121	107	1346	79	119	118	2317	15970
CDK5	843	700	54289	558	834	901	12374	195660
CDKL5	918	344	83895	685	724	357	7177	100296
CDS2	222	186	7206	226	290	217	79	198659
CDSN	241	683	2560	157	250	811	6014	2606
CE170	2225	1907	92613	1784	2867	2014	139520	137545
CELF2	107	94	39168	84	126	100	123	24129
CEND	230	207	2843	249	312	235	339	38306
CENPV	458	428	43848	431	536	473	4446	171867
CEP68	133	114	25955	119	237	134	154	1453
CEP97	607	171	39987	111	187	177	205	5278
CH60	14301	5773	926982	1946	9788	11722	164198	324177
CHM1A	1459	1875	744364	350	1908	1409	2389	214800
CHM2A	2717	664	427679	1853	1121	705	3473	125555
CHM2B	332	299	84261	310	423	339	809	16863
CHM4B	1838	1511	1458357	1673	3046	1702	2595	410643
CHMP3	838	735	318157	791	977	772	1025	139244
CHTOP	2336	1552	149762	1056	4197	8138	3288	27576
CIRBP	295	470	3839	204	311	279	400	3761
CISD3	2211	328	167499	672	1012	370	2296	20530
CISY	587	236	49092	758	837	638	4840	9014
CK5P3	119	100	1284	82	130	105	155	13940
CKAP4	37310	20198	5958064	21239	135618	33654	341139	10655493
CKAP5	33	31	514	26	43	34	362	2833
CLAP1	321	289	6031	335	377	294	5381	72178
CLAP2	2234	1369	105034	1356	2662	1507	27844	409376
CLCA	1106	916	854176	1102	1396	1015	10992	165072
CLCB	566	493	596630	2730	2846	555	6120	79788
CLD11	6137	2891	340651	164	6518	13017	3547	657493
CLH1	7447	6171	7025088	4095	13433	8644	95670	1007809
CLIP2	508	443	12017	408	669	465	19084	90620
CLMN	166	76	425	31	47	32	48	4298
CLPT1	315	263	2821	169	265	304	220	38342
CLUS	325	173	15004	177	197	185	136	2019
CN37	88080	45995	34041970	63330	176486	128788	1395659	67676083
CNKR2	1124	600	207821	820	6647	1134	36739	313775
CNNM1	3178	1273	2720	662	224	201	284	3961
CNNM2	24584	10826	10813	4997	874	784	68	10017
CNNM3	45170	24618	46818	13223	911	764	918	5879
CNNM4	11430	5053	5597	2608	325	306	224	4670
CNTN1	230	132	8000	79	243	447	918	16570
CNTP1	281	242	9648	374	556	319	2277	32598
CO1A1	204	155	1396	127	191	5096	192	1344
CO1A2	72	79	113	20	31	2875	29	356
CO3	287	55	911	42	74	70	53	620
CO4B	1208	47	530	45	56	51	43	638
COF1	8672	4481	1616566	1023	11921	11646	3667	1324421
COR1A	449	457	6023	437	956	635	2383	98134
COR1C	1049	879	205274	1112	3508	976	11547	472134
COR2A	73	60	1436	80	93	68	160	17174
COR2B	1708	1163	467184	1037	8773	1548	18087	482751
COX2	2698	2434	257001	2612	6318	3524	15850	528204
CP110	2072	181	83797	167	471	146	619	22333
CP46A	766	666	6000	644	760	855	4367	304575
CPSF1	449	110	961	543	130	336	1612	1084
CPSF5	19920	5367	131262	3017	19191	30867	82999	52710
CPSF7	296	229	2814	1226	296	248	5390	2906
CPT1C	1469	1381	15965	1110	1659	1544	2101	1131798
CREL1	111	96	1838	75	109	102	561	22564
CRIP2	1085	977	96587	1005	1367	1085	35187	365159
CRYAB	1041	659	122758	442	1467	706	1394	134645
CRYM	223	204	8360	182	302	215	332	48704
CSDE1	100	83	1207	73	107	89	478	16012
CSK2B	659	536	40183	455	645	597	601	6337
CSKI1	503	459	11237	546	513	471	6124	71773
CSKI2	558	504	7972	563	623	542	36543	9090
CSKP	47	42	554	39	64	46	60	6257
CSRP1	5744	3796	942638	639	10130	8350	44355	1674795
CTBP1	292	263	5871	232	341	265	5106	50176
CTNA2	2911	1524	1282520	1882	5180	2456	17491	261768
CTNB1	2562	898	731787	1440	4246	2072	18680	209098
CTND1	26	21	3236	34	40	46	31	142
CTND2	662	301	112637	271	2013	418	9237	51932
CTRO	524	459	44424	3689	8644	969	4555	80238
CTTB2	120	97	9158	92	169	104	1292	20225
CX6B1	427	351	3812	468	541	395	559	64148
CXA1	3435	914	586197	527	3634	721	7432	382996
CYB5	587	480	9082	312	512	515	576	225618
CYFP1	466	391	4998	289	449	423	8583	31116
CYFP2	950	764	32088	578	1053	906	27898	130955
CYH1	282	292	17471	277	336	310	3334	6464
CYH2	208	170	60413	111	985	183	5288	52684
CYTSB	81	71	862	82	106	77	91	9739
DAAM2	56	48	544	35	70	51	28	2566
DAB2P	152	133	2271	94	237	45	2743	19243
DAD1	1765	424	4706	5157	1992	467	494	103653
DC1I1	725	584	46935	411	1101	674	12785	275296
DC1I2	549	505	32378	363	543	542	6525	208895
DC1L1	1124	1048	303337	752	3399	1577	27558	590762
DC1L2	257	248	2841	229	318	259	3837	110433
DCD	18844	19962	72986	26118	61337	67436	228799	8278
DCE1	112	101	1178	89	143	113	1530	18332
DCE2	68	56	888	41	67	61	1432	14113
DCLK1	4447	2132	960590	3087	12383	4690	116157	1916530
DCLK2	866	770	11914	1048	1259	986	4804	161872
DCTN1	6444	6119	609145	5246	14486	6423	65553	6054929
DCTN2	2111	1896	249340	1606	11398	2162	38802	6339312
DCTN3	228	173	8765327	153	160652	30256	210893	57264349
DCTN4	1358	1163	122167	1464	2748	1252	16148	1424238
DD19A	285	250	3609	195	284	266	383	32755
DDRGK	159	138	22890	167	207	156	221	2692
DDX1	11555	5175	523418	85028	17852	36879	102563	921404
DDX3X	3526	2000	479962	24951	6813	6867	35374	784334
DDX41	76	60	795	351	68	64	86	807
DDX5	9965	2817	274935	44442	23105	15434	37324	192719
DDX6	186	197	23619	253	216	253	261	20763
DESP	2373	2428	3684	1221	326	1082	2938	2922
DGAT1	278	282	15590	222	313	278	277	4237
DGKB	1092	693	129041	678	2564	1536	18155	297975
DGKE	697	581	51376	289	1157	676	8029	200949
DGKI	365	311	41049	242	369	306	3180	82000
DGKZ	414	372	13710	560	517	704	5273	104445
DHB11	170	145	1796	105	164	158	190	24170
DHB12	2258	1478	309429	825	2536	1582	21899	889707
DHB4	858	1605	14166	3630	1167	779	14365	147157
DHCR7	235	234	2542	238	260	240	235	42780
DHE3	7403	3354	1103011	800	4113	4954	48051	1688823
DHR13	144	127	2275	119	189	136	196	22537
DHX15	161	74	1539	59	192	73	977	13379
DHX30	1281	867	221441	921	2664	1235	16750	320659
DHX36	448	386	60308	294	802	507	2589	88994
DHX57	49	45	594	41	56	49	178	6156
DHX9	1980	1073	999076	1985	13701	2409	21067	206767
DIRA1	243	220	23500	168	270	240	595	31463
DIRA2	665	1098	190165	836	1343	2723	5780	208383
DJB11	2180	563	116327	282	1061	2065	6525	371424
DJB12	325	264	4306	131	426	288	480	25506
DJB14	121	96	1268	67	114	103	485	25780
DJC13	87	82	966	71	77	83	732	9860
DJC16	1700	1754	113184	1354	2394	2138	9081	338063
DLDH	3955	2165	2178879	1808	3654	3739	51347	474807
DLG1	707	416	88327	847	916	855	8969	186631
DLG2	801	385	163350	459	1231	440	3644	78748
DLG3	642	407	84192	959	1391	538	10004	124576
DLG4	1041	609	596691	1388	7131	1763	10763	371051
DLG5	15	13	2291	13	20	14	148	2225
DLGP1	411	368	122969	625	4039	394	24316	115772
DLGP2	33	29	3319	25	39	30	41	115
DLGP3	591	277	87331	408	1947	602	4485	61962
DLGP4	413	369	80450	384	2510	361	9895	80073
DLRB1	452	455	36422	323	508	791	1409	6046
DMD	90	12	8132	3683	961	491	1113	378
DMWD	108	95	11806	89	141	102	1087	20173
DMXL2	1216	1442	192656	1042	3670	1397	19560	363442
DNJA1	1311	1037	242587	1620	6701	2749	37766	590411
DNJA2	2863	2781	434367	914	19336	2753	81796	915946
DNJA3	1132	1056	311492	788	2142	1118	27947	586376
DNJA4	204	191	2314	162	270	203	2424	2335
DNJB2	139	125	20429	149	189	141	488	37504
DNJB4	139	122	1481	94	142	139	164	26255
DNJB5	326	292	28801	223	326	313	2999	75518
DNJB6	2803	1775	636489	1379	12752	1462	34868	602479
DNJC5	378	348	12163	250	374	373	462	83786
DNM1L	128	107	1592	88	147	141	451	13799
DOCK3	153	132	16622	104	320	227	1897	24477
DOCK4	35	33	457	28	43	24	12	2253
DOCK7	1242	1118	57382	1109	4766	1149	25198	100234
DPOE1	21	18	254	15	21	17	355	3586
DPP6	65	57	706	43	65	63	530	8727
DPYL2	3279	940	108809	1339	844	4823	20336	243119
DREB	200	168	102645	133	1375	186	7156	179048
DRG1	98	87	1074	80	120	89	870	11555
DSC1	1979	1359	7429	617	2885	1005	4099	1587
DSG1	7803	3161	12213	2896	7954	6198	12392	21916
DTNA	732	648	59790	393	542	695	7557	110626
DYH8	1511	1162	109	210	9	919	11	108
DYHC1	2006	2211	303546	1600	7480	1989	32190	686009
DYL1	5484	4754	450357	4199	6139	5632	9725	900005
DYL2	8831	4029	1302495	5018	12978	11716	11818	5332448
DYN1	13579	10116	260534	6808	17353	17391	2072707	774151
DYN3	1940	957	26310	1264	1993	1901	89873	154903
DYST	577	515	30583	533	5528	596	12865	78331
DZAN1	943	862	180626	667	3272	966	320687	177394
E41L1	242	424	58022	201	285	261	4361	47274
E41L2	34	35	599302	34	4028	798	23344	856625
E41L3	1409	692	158924	861	3362	1333	10668	207655
E41LB	109	96	1580	105	335	110	103	7650
EAA1	17842	14772	158710	3819	23469	33363	136499	407547
EAA2	15102	9397	81969	5839	9133	18458	42101	3032817
ECHA	4741	2557	847694	1975	5510	3062	92630	1107266
ECHB	1098	527	91236	377	1640	1116	17816	161791
ECHM	1896	733	106761	620	835	1809	11054	102404
EF1A1	20057	8010	2197477	9020	23308	9102	62119	10410862
EF1A2	8313	5100	503530	7659	17624	8028	64223	1843788
EF1D	345	349	7648	114	387	354	2749	58301
EF1G	426	398	19317	367	1093	434	4557	182348
EF2	847	439	8576	454	337	480	6566	121352
EFHD2	630	567	19530	424	649	577	5758	11197
EFTU	11167	3285	3522717	3882	7988	3709	375693	1648611
EIF3B	114	116	1322	153	281	123	126	20908
ELAV1	458	499	49784	482	533	459	1160	100304
ELAV2	1954	1688	594029	1464	2284	2652	14749	735243
ELAV3	1530	493	424231	2049	564	2141	9797	408650
ELAV4	690	656	171667	776	800	722	4339	194861
ELMO1	73	64	861	48	74	71	87	12279
ELOB	972	396	33341	200	334	1300	2561	3281
ELP1	287	251	5163	311	514	494	2648	43273
ELP3	132	122	28354	79	594	219	2230	50279
EMC1	1264	1058	141280	970	1666	1427	14043	546090
EMC10	448	263	35429	472	719	297	3799	78343
EMC2	729	289	32436	257	423	298	5244	342595
EMC3	1484	169	104959	1879	2122	2079	7851	413931
EMC4	244	220	21361	228	312	250	292	67094
EMC7	220	181	18261	147	240	240	637	51341
EMC8	909	921	117169	781	1857	1442	1513	320565
EMD	883	799	11507	744	1113	866	1506	281365
ENASE	183	148	1510	152	166	157	4496	1699
ENDD1	96	81	1126	66	94	80	117	33808
ENOA	937	1063	60700	624	1750	1153	14770	63202
EP15R	864	764	129214	994	1389	891	7910	324745
ERC2	6767	4339	2200247	16699	53497	7330	73807	1390012
ERH	2488	1045	204204	823	3685	4695	1499	149656
ERLN2	659	625	10091	477	765	224	3722	210398
ERMP1	93	81	775	92	107	85	81	8165
ESYT2	132	123	1438	106	149	132	135	16090
EWS	6465	1447	20516	30091	4613	15620	162212	22432
EXOC4	50	42	1331	47	63	44	37	2716
EXOG	196	168	2283	119	257	197	3183	9587
F120A	1837	671	299226	16373	4201	4864	10312	327135
F120C	553	413	118498	3014	648	1120	4089	93852
F241B	284	240	3421	196	281	232	1234	130592
FA81A	483	413	30328	353	546	474	503	18604
FA98A	2189	808	350449	13305	10301	12350	53647	205071
FA98B	846	684	85407	2954	1520	1386	5553	134872
FAAH1	249	251	1360	98	280	260	25	41594
FABP5	3671	7267	8685	673	839	2983	863	9882
FAF2	251	225	3160	201	329	250	48	41402
FAHD1	373	384	34273	378	427	423	414	8264
FARP1	696	679	58208	567	1007	723	6401	190809
FAS	448	361	10770	399	882	591	4091	103173
FBSP1	249	219	45661	204	332	238	1738	21848
FBW1B	56	53	662	53	74	58	459	6170
FBX41	481	327	73432	385	1227	491	4114	75602
FETA	965	486	514	38	168	551	57	493
FETUA	11725	12850	12678	857	66	14431	63	361
FHL1	514	450	29615	350	571	483	7589	186923
FIBA	922	330	95236	353	14969	324	2357	9747
FIBB	1751	338	193308	284	12160	322	3637	13290
FIBG	1032	321	98720	294	5318	337	368	8792
FILA	21	13	40	6	5	5	70	6
FILA2	5415	678	7464	516	5640	3619	9026	8565
FINC	1058	433	6056	296	587	18566	621	5753
FIP1	362	314	3507	369	382	350	6069	3666
FKBP8	196	176	1729	125	220	322	32	51760
FLII	119	101	897	74	116	108	148	17390
FMNL2	1668	1667	362648	2460	4883	2095	22369	616432
FMR1	1023	462	149568	1470	1966	6822	9267	255885
FRM4A	38	33	397	33	45	37	10	2851
FRS1L	444	381	10687	493	565	422	1349	296574
FRY	606	530	235902	634	7159	931	1255	84606
FRYL	51	40	110043	25	830	760	6	30411
FUMH	159	138	1155	134	158	152	826	3186
FUS	10892	6776	83592	107639	20941	39861	230362	90121
FXR1	1287	993	142314	299	1814	6255	13663	219684
FXR2	373	337	20101	366	496	836	4433	104752
G3BP1	325	275	11238	16618	1575	1808	412	103517
G3BP2	6893	4117	45810	135822	7262	43106	33560	1452101
G3P	44365	25789	19842557	30192	49764	46447	947195	38180144
G45IP	191	187	14553	192	217	198	1878	2255
GABR2	67	55	5576	67	109	62	1253	7648
GABT	702	494	50804	357	561	615	8343	51903
GAL3A	1677	483	107605	343	529	1505	5923	125352
GALC	205	175	11848	136	205	190	1086	2919
GAR1	237	203	24229	174	270	262	2774	2491
GASP1	427	94	27638	62	856	100	2678	53026
GBB1	374	336	32037	296	429	400	308	4389
GBF1	207	190	2522	134	246	202	178	25074
GBRA1	377	331	39805	299	1031	707	8630	12483
GBRB2	1387	807	14508	378	786	424	10777	29995
GBRB3	1256	338	15515	1060	706	346	6299	15736
GBRG2	136	985	59093	121	1517	1080	11260	5848
GCN1	54	47	526	37	62	60	38	4973
GCP2	1006	829	48703	593	1135	1026	3634	222247
GCP3	1291	1367	41876	1322	2390	1466	6410	324645
GCP4	145	136	11493	102	171	162	983	37181
GCP5	132	133	1651	105	158	143	185	11835
GCP6	114	115	2786	100	132	120	165	14962
GDPD1	423	384	4728	282	424	398	561	104357
GELS	471	332	5116	325	435	341	386	71863
GEMI5	33	29	376	21	33	32	39	1969
GEPH	1026	993	880529	1716	40371	1068	3205	318546
GFAP	10394	5274	943231	2676	83006	6493	62152	1957531
GHC1	316	285	3602	239	340	289	3327	3470
GHC2	225	198	2429	140	218	206	1633	16136
GIT1	888	847	176418	1044	4861	877	79208	341452
GLNA	3377	1080	497808	808	4000	3406	38588	1174369
GLRX5	290	299	30008	284	345	318	469	4042
GLSK	62	54	1999	40	63	439	2657	6552
GNAO	4408	3214	129308	853	1470	6027	23729	503798
GNB5	160	147	6562	106	158	158	2253	25463
GOGA3	221	135	35221	140	2603	205	1207	2572
GPAA1	517	949	6070	836	553	484	632	531956
GPD1L	194	174	22463	123	217	318	32	30958
GPI8	853	895	7982	592	1011	907	975	626850
GPM6A	19289	7382	94957	242	3878	14073	14136	13441
GPX1	2054	168	7716	159	189	173	128	10767
GPX4	106	100	20474	109	139	340	518	32453
GRASP	158	143	10527	105	186	149	207	10268
GRDN	206	124	22868	185	847	192	1198	20713
GRIA1	326	292	3954	1124	511	313	3904	71677
GRIA2	3040	3108	96470	5507	3131	3251	37400	1023048
GRIA3	816	735	13712	500	1028	814	10900	182136
GRP1	175	161	3488	174	200	185	1788	27994
GRP2	70	69	753	52	77	71	1793	5348
GRP75	3430	2038	242025	1268	2624	2468	46539	142579
GSDMA	1028	417	2291	82	132	900	1057	1131
GSK3B	240	211	30612	221	255	226	2375	64452
GSLG1	181	147	6228	133	201	138	239	16435
GYS1	115	97	21356	993	116	240	770	7671
H10	1770	1471	48250	374	573	448	2230	84096
H4	44233	21937	778339	14058	19655	37528	11322	403349
HACD2	623	564	39138	419	668	631	608	11126
HACD3	1243	1063	35163	1107	1539	1516	5677	896672
HAP1	437	396	11519	372	599	418	5945	97594
HAX1	145	155	7488	127	141	190	39	21107
HBA	51691	39888	151967	341	21720	52111	8505	313431
HCD2	2535	1538	162486	536	1127	2424	18770	116600
HCN1	77	66	841	58	92	69	2606	3241
HCN2	670	563	18605	522	694	669	147053	53066
HDA11	149	151	1544	112	177	161	270	18465
HECW1	21	17	227	20	26	18	146	1866
HEMH	184	175	3688	178	214	193	1768	13268
HERC2	146	107	25402	85	185	119	193	7858
HIP1R	188	173	1891	195	890	186	237	20997
HKDC1	43	34	17684	51	83	88	163	30996
HMGCL	268	272	37032	196	308	391	40	2537
HMGN5	343	502	981	2852	119	45861	118	961
HMOX2	179	196	1686	185	210	198	130	61009
HNRL1	96	154	8684	112	208	113	682	7601
HNRPC	3181	1420	920968	1676	4232	1890	17648	78100
HNRPK	3331	1216	700224	16299	5661	3909	20333	592853
HNRPL	739	627	292545	2114	3297	1097	15949	230558
HNRPM	301	195	52407	274	1394	327	7302	68605
HNRPQ	551	586	13171	573	632	976	9157	240409
HNRPR	638	553	120076	677	734	1819	9782	77134
HNRPU	36566	16666	747099	35768	53151	147840	71814	824240
HOME1	1398	1144	1158956	2527	12911	2401	43669	762433
HOME3	808	674	160462	876	1557	723	5480	75478
HORN	2219	888	8495	653	1982	638	7501	17800
HP1B3	1595	465	23904	824	1127	974	984	156810
HPCA	1596	1617	193080	905	2255	1727	1726	18640
HPCL4	1175	1116	219619	850	1366	1782	119	10560
HPLN4	727	636	135899	468	700	660	3016	113979
HS12A	3485	1118	409123	2061	3838	2435	45807	831059
HS74L	192	219	2148	181	197	163	246	24995
HS90A	274	229	1018	176	273	354	1622	19279
HS90B	743	515	6168	371	575	577	10028	85260
HSDL2	526	456	5642	356	518	484	5377	188084
HSP72	226	211	25269	189	282	229	4511	77685
HSP7C	34122	8251	4043114	8836	56227	16881	534431	7620208
HTRA1	181	149	28037	191	233	173	267	19495
HXK1	996	686	80112	536	835	1560	21730	250686
HYEP	220	228	2386	190	252	231	152	37968
HYOU1	51	44	580	33	51	47	328	6847
ICT1	334	325	64765	323	357	330	338	3842
IDH3A	4185	2084	395893	937	1154	4223	40510	356772
IDH3B	5795	3464	932515	2659	6574	7234	78173	1102467
IDHG1	14635	3516	5041660	3220	23328	21413	240225	6158642
IDHP	723	672	86146	518	777	709	9085	107266
IF2A	205	180	4065	164	253	193	2537	2346
IF4A3	559	500	225566	505	1273	582	4377	95062
IF4B	17435	2723	7353	510	809	737	850	14431
IF4G1	46	39	1799	34	54	41	369	7799
IF4G3	167	134	1583	96	163	181	540	17444
IGEB	83	68	18760	68	101	72	231	25744
IKKB	581	618	12570	759	666	964	1114	146248
ILF2	830	679	118011	846	922	1677	26849	114812
ILF3	337	283	4457	246	358	298	12705	17851
ILK	450	377	34330	305	507	482	3606	87701
ILVBL	82	76	1106	57	87	77	113	26331
IQEC1	3235	1742	563699	2354	25257	2780	77108	601356
IQEC2	795	474	121624	695	4323	879	10101	79036
IQEC3	595	514	98429	428	1429	561	8679	137744
IST1	915	730	317009	868	1304	797	3725	195067
ITIH3	341	293	481	350	62	344	14727	471
ITM2B	420	427	35905	307	484	496	1636	62963
ITPR1	1597	1164	19430	1025	5029	1472	13397	254412
ITPR2	30	27	298	30	43	30	35	2809
ITSN1	609	575	10424	581	837	573	1307	156027
ITSN2	1806	12	332072	13	2282	12	8280	255063
JCAD	1206	707	41360	541	1610	720	2846	364904
JIP1	76	62	1813	105	147	70	140	11046
JIP3	635	41	10482	689	629	565	4731	122990
JKIP1	389	338	6916	313	383	359	5973	62922
JKIP2	1081	844	194013	1579	5132	1543	17848	208513
JKIP3	417	371	8183	439	554	409	3292	71061
JPH3	366	243	33122	249	968	262	5944	81083
JPH4	116	106	1602	223	119	109	999	15629
K1107	25	22	411	26	33	25	78	4770
K1109	4	4	3129	4	64	4	107	2523
K121L	50	46	538	39	66	49	275	16785
KAD5	312	273	4063	544	664	309	10253	67570
KALRN	377	345	104942	374	3397	683	3090	91512
KAP0	211	197	22606	477	218	565	589	57153
KAP1	293	320	46648	303	366	324	427	4535
KAP2	524	475	213376	397	1375	432	355	33104
KAP3	362	78	53399	58	500	286	399	1183
KAPCA	593	443	170602	271	695	634	162	2891
KAPCB	845	668	218990	409	1034	1091	106	3812
KBTBB	110	95	1452	72	167	97	602	13307
KCAB2	237	373	30548	221	316	241	286	35312
KCC2A	89626	14796	38288949	22214	6014308	30044	9158473	33844590
KCC2B	21534	4519	5757143	13772	580784	12736	2588656	8012000
KCC2D	6903	3115	3021231	5183	144055	3245	873099	2439422
KCC2G	10769	5651	2264459	5077	237743	8540	867927	2206755
KCD12	340	307	19907	286	458	330	2836	27781
KCD16	1385	1007	330686	2057	3160	2753	26049	271334
KCMA1	130	114	1180	85	134	162	199	12696
KCNB1	62	51	808	38	61	55	78	8242
KCNQ2	50	46	672	35	53	47	68	5707
KCRB	579	545	8378	122	288	768	2683	5615
KCRU	17210	5794	179579	2085	3482	6036	24608	3940868
KDIS	352	219	3398	221	259	240	437	56194
KEAP1	113	98	6692	66	109	107	903	10915
KHDR1	2661	533	80697	1670	1876	2041	36805	82446
KHDR3	312	224	159468	311	347	624	5472	13172
KIF1A	35	33	593	38	39	36	160	3559
KIF2A	1635	512	72910	1485	3370	1692	35874	368155
KIF3A	559	497	61442	368	728	840	10455	190718
KIF3B	642	539	25058	401	794	765	7760	48245
KIF3C	63	54	1963	63	126	64	1172	12020
KIF5C	509	469	33457	418	1152	503	17799	92100
KIFA3	136	125	6511	128	150	131	479	48450
KIFC3	374	320	5079	322	479	366	14615	5413
KINH	316	295	14312	201	353	321	4725	43812
KLC1	87	77	920	71	107	80	1417	20201
KLC2	625	540	11207	326	492	375	24349	67074
KMT2C	5	4	52	389	6	4	6	49
KNDC1	54	54	634	59	67	58	59	3952
KPBB	44	41	482	44	51	45	250	9200
KPCB	339	312	86351	398	645	322	11255	78850
KPCE	151	129	1887	98	192	156	81	6655
KPCG	4274	1513	912234	2216	9569	3534	245800	697715
KPYM	2735	1816	337716	1888	4663	3389	13262	590843
KSR1	111	98	11288	106	137	106	847	10716
KSR2	84	79	713	51	89	140	12	12957
KTN1	2523	2162	585561	702	12673	2319	29711	843350
L2GL1	460	398	4075	398	1361	659	2907	53904
LA	429	401	67542	381	495	444	784	13351
LACTB	1192	1039	333445	777	3243	651	29017	452905
LANC2	271	244	17149	253	550	277	3084	66298
LARP1	271	275	24041	353	362	346	3038	51597
LASP1	466	381	54851	410	1594	400	13095	227017
LCLT1	121	104	1538	83	543	118	517	43802
LDHA	754	334	16235	250	368	418	4715	57003
LDHB	329	298	93145	278	780	1201	16609	328173
LERL1	461	416	84562	499	627	473	680	4879
LGAT1	98	94	1091	95	113	99	103	53406
LGI1	2091	838	152859	1608	2931	2411	18839	357398
LGI3	6286	3084	2196288	2976	29377	7699	120732	847032
LIN7A	1028	411	26602	292	398	1276	2459	22595
LIN7C	316	276	43439	213	1426	263	395	3898
LIPA2	309	297	58965	325	2487	317	5513	84202
LIPA3	110	89	20327	98	166	96	1738	10798
LIPA4	115	94	2273	101	210	99	828	13058
LIS1	104	91	1152	68	102	101	117	21236
LNEBL	191	133	14284	171	208	233	3418	63496
LNP	135	113	1709	121	176	123	172	32717
LONM	254	128	20946	99	152	146	5181	26035
LONP2	59	48	682	34	55	51	1017	2750
LPPRC	204	177	2466	137	226	184	722	22233
LRC49	39	34	3598	40	51	37	2946	26298
LRC59	1579	959	97429	678	2071	1549	13641	733192
LRFN4	257	213	2267	183	223	217	4769	2455
LRRC7	233	210	58535	217	1975	291	3176	41301
LUC7L	198	178	11224	159	724	190	1204	19617
LUZP1	66	57	3435	45	64	62	601	8101
LYPL1	264	227	22341	174	259	224	325	3238
LYRIC	4262	1653	710061	1975	6530	3140	66889	1050262
LYSC	7806	5977	32088	4039	9488	8051	3954	4530
LZTS1	301	268	48762	254	392	332	4419	38797
LZTS2	41	37	5788	45	56	42	403	2210
LZTS3	614	465	97967	623	1234	664	28229	83645
M21D2	677	594	7054	468	6205	625	32067	17081
M2OM	177	178	6332	154	197	180	1036	9864
M3K5	329	306	68753	333	1982	322	917	20819
M4K4	29	26	321	30	38	29	40	4098
MA6D1	3365	870	380449	888	3424	2162	6211	385426
MA7D1	704	797	147766	967	2029	969	11787	190486
MACF1	687	608	64403	522	5912	687	18506	100690
MADD	101	92	1149	78	121	97	969	9416
MAG	299	330	14191	1877	289	474	3035	29221
MAGD1	60	52	987	60	78	61	119	7635
MAIP1	2213	2169	1010534	2010	2446	2252	154	5416
MAP1A	7149	4273	1650113	5889	40284	4751	96139	919687
MAP1B	5548	1353	3468168	3343	54594	4588	26583	386493
MAP1S	726	635	27083	726	2279	739	95907	45652
MAP4	576	427	51863	473	1323	1155	6762	151015
MAP6	8424	2649	783264	4390	14122	5285	103994	1485196
MAP7	350	232	4487	1505	272	1344	4067	42671
MARK1	124	113	5477	310	160	123	2453	44546
MARK2	1533	830	76988	765	1725	1811	19079	253455
MARK3	597	203	16467	208	481	218	5174	60007
MARK4	614	338	273132	729	1254	1457	5384	75956
MAST1	379	297	5351	241	545	332	5103	54594
MAST3	1573	1449	171369	1287	2226	1569	21061	233698
MAST4	40	35	470	26	40	39	253	2907
MATK	95	85	1128	87	119	94	24	18309
MATR3	1188	942	743425	914	7636	2637	21903	174605
MBB1A	57	50	2492	77	93	71	13	7817
MBLC2	94	75	1170	55	90	83	1319	20707
MBNL2	308	282	27128	216	319	292	2177	81888
MBOA7	474	473	5019	427	555	775	208	297390
MBP	1138883	511423	302908746	1178936	4388945	5674437	4898864	111882615
MCCA	1269	747	310885	672	1567	1298	47038	382426
MCCB	1985	867	403691	735	2258	896	47054	266022
MCTP1	130	121	2263	94	135	177	294	18735
MDHM	2936	2111	48557	497	1192	3776	5245	18672
MECP2	185	162	4292	180	224	181	239	40754
MEP50	653	604	7665	554	638	631	1140	154211
MEST	1165	1002	165060	709	1543	1777	18801	513423
MFR1L	470	433	5168	392	590	477	4084	9079
MGN	14442	14358	2838051	13670	15787	14886	19853	472881
MIB1	45	37	1658	31	44	37	388	6400
MIB2	134	176	1886	89	238	212	1028	16505
MIC19	271	232	1229	271	351	273	1525	1281
MIC60	381	476	3781	401	369	357	15182	9436
MINK1	971	520	148200	447	3732	524	15392	177373
MIO	128	124	1421	117	188	130	1039	17220
MIRO1	151	135	2351	136	162	142	2324	11158
MLEC	378	339	4822	321	497	362	190	96913
MLF2	3139	964	631347	818	6191	3606	75207	1497523
MLH1	22	20	83764	18	115	21	732	255
MLP3A	867	679	537189	446	1542	2674	5049	663448
MMGT1	394	379	59631	381	454	399	1352	249240
MMSA	118	138	20251	62	317	81	270	13024
MOBP	894	730	251326	934	2419	1778	12692	888483
MOG	83544	27140	8793065	40373	130841	226545	65749	7933357
MOGS	587	460	36699	1268	963	2042	4598	142563
MP2K4	175	145	17520	116	173	150	205	29021
MP2K7	723	647	135201	578	1331	680	8024	177511
MPCP	418	214	31913	301	483	348	6662	34961
MPP2	65	59	973	156	80	352	1579	10362
MPRIP	217	200	60589	171	2536	222	561	19050
MRCKA	320	196	3167	172	319	212	1171	35527
MRCKB	117	103	1333	118	147	110	184	10593
MRO2B	92	83	332	15	25	23	48	2930
MSI2H	374	380	23886	384	431	397	291	4225
MTAP2	3230	2266	281227	2203	4062	2601	25461	606282
MTCL1	155	132	22560	97	536	144	425	8507
MTMR1	475	478	6849	442	534	495	11373	43346
MTMR5	1552	978	118667	4016	5832	1927	41472	277155
MTUS1	817	165	685	54	78	60	74	1132
MTUS2	44	40	646	37	59	43	203	4819
MUC19	46556	19040	58357	17598	22220	82511	51954	13442
MY18A	2404	2385	227538	2209	19829	2621	14984	320779
MYCB2	379	362	71033	320	1574	307	2681	60590
MYEF2	513	462	32178	450	655	516	3928	167937
MYH10	2719	1927	423945	1640	61678	2340	21310	221017
MYH14	663	551	36921	452	9538	577	1386	28493
MYH9	838	847	60137	493	9384	631	1474	32772
MYL6	4357	1892	1107512	1490	59990	1593	16433	701575
MYO1B	416	344	5863	334	411	381	2034	73949
MYO1D	852	772	100140	621	1514	908	3696	168810
MYO5A	11089	6055	4617236	6135	132236	5684	169773	3738263
MYO6	893	806	216517	575	7897	1640	7619	335166
MYO9A	180	114	219	167	23	130	759	8555
MYORG	235	212	3760	201	310	220	257	40066
MYPR	266506	164366	23095383	162372	298977	787043	357486	40517930
MZT2	450	422	61784	274	477	748	66	85101
N6MT1	66444	65710	98359	288	93157	83058	431	3762
NAC2	732	167	17314	193	500	812	3030	54883
NAV1	109	84	6390	75	604	92	1507	10955
NB5R3	157	125	1608	89	148	137	175	26899
NCAM1	667	81	827	51	477	86	66	705
NCDN	105	106	1001	90	123	110	551	9416
NCEH1	392	325	1992	252	384	371	37	187643
NCKP1	1013	992	74366	1287	1759	1430	31570	134301
NCLN	1383	1245	110535	792	1346	1571	10316	423773
NCOA5	3558	1169	120760	9702	4917	8954	33542	24932
NCPR	379	316	8218	324	459	463	663	102121
NDEL1	100	85	15049	89	124	101	1722	14323
NDUA4	881	1803	9624	612	1887	855	6335	148283
NDUS1	31	27	360	26	137	27	1245	37064
NDUS2	160	134	9672	110	156	133	1717	15524
NEB1	176	157	29427	152	375	125	2013	40414
NEB2	171	155	3514	161	653	169	2238	40307
NEMO	331	339	3864	270	327	357	453	81998
NEUL4	73	65	15940	61	182	69	702	6491
NF1	354	331	27763	336	1253	350	4302	81766
NFASC	96	57	999	40	192	61	568	14230
NFH	20716	1401	476796	1206	42092	2057	21739	442151
NFL	186900	8319	3229306	4290	207973	9154	198290	3026213
NFM	104389	5115	2537701	2317	206640	5540	123166	1863407
NFS1	332	311	18206	290	389	343	3173	20461
NGAP	764	380	146317	411	4849	708	10662	115761
NH2L1	841	736	71905	568	1632	839	993	9591
NHP2	1169	322	43950	441	629	3885	500	2889
NHSL2	545	214	4110	105	80	69	557	4431
NICN1	224	224	7391	159	246	243	178	2567
NIPS1	3870	2491	325496	1944	6349	13219	34100	520620
NIPS2	4030	717	194417	494	1126	5660	33588	210807
NLGN2	239	279	16184	272	276	254	3727	12390
NMDE1	157	135	16738	108	259	150	792	38845
NMDE2	329	243	63053	224	1210	265	1438	47858
NMDZ1	1668	1208	306968	627	5049	1320	9988	237052
NOMO1	962	379	99366	626	1033	741	5709	243356
NONO	3462	1999	25382	113476	7645	15227	46513	23324
NOS1	2477	1903	183721	899	10126	2417	237014	338489
NPTN	22105	7462	105645	3615	7136	11833	35592	414946
NRX1A	55	53	1156	54	289	127	60	10158
NRX2A	14	12	376	16	18	13	18	1099
NSF	39503	15938	13039629	18310	86328	31038	746772	18276460
NUBPL	430	278	43224	247	408	293	6493	21455
NUCL	748	700	10280	696	778	769	992	228374
NUFP2	172	164	1549	168	198	176	2049	24828
NUMBL	643	371	32569	760	637	605	10433	194775
NWD2	218	191	25790	178	612	332	2626	29455
NYAP1	46	37	586	27	45	41	1176	3498
NYAP2	57	51	960	62	78	58	1937	5874
OCAD1	254	227	26754	173	254	244	530	3517
ODB2	1905	1684	2325983	1462	11284	1976	5845	157717
ODBA	306	179	35499	169	261	183	893	5492
ODO1	3246	2780	9740852	4550	6172	5042	25420	751742
ODO2	6328	4698	26747720	3575	11041	5383	31958	1096474
ODP2	4282	1224	7339766	835	41771	4674	54956	72314
ODPA	1746	1502	3886835	1627	3630	3764	21104	181759
ODPB	3782	1581	2321370	1507	4129	1896	21660	183547
ODPX	1589	593	2060488	499	4150	2056	15280	58691
OFUT2	106	100	1170	106	123	110	121	16844
OGDHL	2096	1843	5183306	3361	5335	4644	14435	397714
OGT1	48	41	2804	29	47	44	461	4330
OPA1	301	264	3781	217	358	302	10582	21166
OSBL8	549	546	9747	505	631	474	5527	192235
OSBP1	2644	2616	8126	2055	885	2488	816	1230450
OSBP2	37	29	459	22	35	33	46	68014
OST48	604	618	57918	926	1329	1179	6024	272789
OXDA	461	419	14403	300	1158	439	10935	11653
P5CR2	2765	876	182977	641	2051	909	100613	223414
P5CS	118	103	1579	80	118	98	2751	10017
PABP1	3993	971	1440018	8377	14035	3848	129558	1487736
PABP4	49	41	3919075	50	20359	48	426733	3755684
PACS1	418	364	26227	282	1678	377	7215	87093
PAIRB	1072	373	2190	780	870	1517	4059	34066
PANK4	61	51	558	49	375	60	1034	7677
PANX2	197	165	1829	123	243	234	117	15324
PARK7	939	851	128678	628	1031	1359	2019	23242
PCAT2	304	274	5643	282	383	384	92	88170
PCBP1	1100	452	125797	411	1268	1177	11055	91780
PCBP2	469	360	131635	335	698	417	5804	96848
PCDH1	58	56	646	56	67	59	61	6576
PCLO	563	321	36212	258	971	490	6885	92105
PCM1	64	21	33048	21	23	21	21	265
PCNT	86	73	20688	55	550	75	85	1308
PDE2A	124	108	12177	81	138	124	537	10190
PDE4B	245	235	46151	201	464	246	5513	70282
PDIA1	892	744	12318	657	898	1739	2167	296728
PDK1	287	253	25125	187	291	282	1599	12758
PDK3	315	320	23879	208	362	213	250	3613
PDLI5	128	118	8134	105	173	122	633	30457
PDZ11	487	1288	238154	1512	1878	1431	1302	20210
PDZD8	335	259	3183	235	339	285	1073	38998
PERI	1127	410	104107	421	720	454	4522	72903
PEX14	1194	1083	537536	870	4227	1299	13284	1141433
PEX5R	694	698	12852	632	1601	723	42906	9514
PEX6	155	128	18746	90	151	139	718	8087
PFKAL	5294	1846	1560290	1821	10562	3811	118008	2884971
PFKAM	10528	5146	3927126	7405	34051	8974	276617	8731669
PFKAP	6422	2127	1580567	4168	14035	6409	142321	4276802
PGAM5	2757	657	818297	2098	4991	3350	95259	1583107
PGAP1	606	550	11385	442	756	709	4087	126502
PGRC1	1297	723	45762	719	795	735	2440	910449
PGRC2	227	218	2518	219	261	229	238	53972
PHAR1	760	577	91366	526	2158	620	17958	128605
PHB	1217	1050	686234	756	1168	1012	81596	39416
PHB2	753	659	416619	561	757	858	56845	86137
PHF24	185	799	17905	142	267	201	5815	35875
PHF5A	364	289	34295	185	305	301	344	3081
PHLB1	240	195	19978	389	305	163	5668	25043
PI4KA	257	225	19405	185	419	253	2677	46571
PICAL	79	71	981	86	108	598	5559	837
PIGS	1003	999	9072	678	1114	1073	791	898136
PIGT	853	849	13851	603	930	921	485	711289
PIGU	1242	1195	13807	1203	1432	1577	151	743394
PININ	95	73	4145	84	113	102	75	515
PIP	11067	14382	65905	3268	12824	17032	9948	22687
PITM1	66	60	797	54	86	66	109	9216
PITM2	627	594	18624	686	942	587	6260	207506
PKHA5	93	78	19968	63	235	78	1158	12906
PKHA6	157	158	2113	125	202	156	204	17951
PKP4	1468	36	529304	33	5079	1361	18442	183823
PLAK	9678	10944	138476	9283	4569	5396	11157	53124
PLCA	906	624	9801	410	682	805	789	209023
PLCC	310	256	3735	188	407	276	390	130125
PLEC	5441	2952	520501	3112	98520	3827	289006	427153
PLPL6	191	167	2223	147	226	176	236	24849
PLPP3	157	126	1872	97	150	143	241	40474
PLPR3	312	264	4378	254	405	277	3476	61405
PLPR4	304	116	14402	94	148	3490	4295	23926
PMGT2	167	156	1577	121	173	205	637	28281
PNKD	357	285	11293	203	336	311	632	75010
PP1A	1875	1545	181950	3894	3703	1776	12779	604666
PP1B	602	537	69747	489	777	560	8292	186996
PP1G	752	649	157858	572	899	674	16266	422423
PP2BA	142	124	12702	289	477	133	3535	28482
PPIB	3785	772	28702	476	3704	5275	9171	74567
PR38B	5295	1092	5400	305	511	2024	6035	4813
PRAF2	2276	2124	24653	1561	2817	1111	410	1106998
PRAF3	1854	1631	16886	1216	1913	2760	446	573395
PRC2A	520	105	5149	1026	823	1943	1234	10122
PRC2C	316	96	11089	136	494	591	655	13834
PRDX1	5294	2697	487369	1797	11386	5850	10932	376867
PRDX2	3664	3239	787859	2221	4745	5238	4624	24060
PRDX3	3419	1290	788676	402	1725	2321	12651	70269
PRDX4	2221	563	25925	689	1104	564	1563	1968276
PRDX5	16965	3869	3118830	1801	14062	11583	34383	1187225
PRDX6	278	248	19000	191	326	372	365	3461
PREB	228	193	3035	143	232	215	301	77455
PRIC2	632	411	113537	312	2967	802	9823	110146
PRIO	821	445	28439	885	1471	1045	4341	47373
PRKRA	1504	1327	177668	1219	1877	1404	16617	518693
PRP19	290	251	112364	190	823	256	687	4203
PRP6	21	18	238	23	115	20	166	6722
PRP8	128	38	10060	63	126	57	7	478
PRPS1	586	593	5978	569	666	601	4497	57860
PRRT1	1012	781	9609	543	909	847	10784	9394
PRRT2	150	135	6126	162	203	538	2824	33897
PRS10	124	107	27165	85	129	121	665	18325
PRS4	133	115	1755	87	139	118	792	20450
PRS7	137	132	2071	112	161	141	774	24377
PRS8	154	127	19396	186	214	135	1431	41863
PSD1	619	552	111939	432	764	908	8915	103618
PSD11	170	137	5517	105	161	149	195	22756
PSD3	414	135	13422	242	326	589	3931	49852
PSMD1	43	44	8025	318	618	397	3223	40730
PSMD2	209	192	15601	142	247	196	2161	51593
PSMD3	77	66	938	51	75	62	95	11849
PSMD5	108	94	1426	71	113	96	133	16218
PSMD6	49	44	90370	42	24143	49	19971	120935
PSPC1	892	592	5942	44128	1103	2497	5458	10807
PTCD3	742	634	91844	704	872	738	18480	121676
PTN2	85	84	1554	83	93	87	83	18216
PTPR2	161	141	21737	63	99	78	322	10445
PTSS1	340	336	50195	302	666	393	733	118978
PUF60	10412	1362	11270	2170	5109	8836	31007	6991
PUM2	72	60	18537	62	87	63	596	19416
PURA	11063	1365	12602214	9225	43956	10324	337587	15237033
PURB	1824	1486	1189281	1327	5957	2357	63854	3099352
PURG	1804	1483	1435700	1472	6318	1671	37213	1836382
PXL2B	249	244	14301	243	268	250	248	15264
PYC	8588	2796	1180134	685	8874	2770	161116	927338
PYGB	995	898	26338	800	1845	42817	17289	368419
PYGM	713	683	8115	521	823	10292	1970	60337
PYR1	296	268	30134	221	560	291	1324	51809
QCR1	269	236	3227	189	282	244	3522	39743
QCR2	371	324	25219	353	461	341	6942	107853
RAB10	3141	2917	254652	991	3875	5104	4886	311686
RAB14	667	441	46537	147	665	616	1565	74825
RAB15	510	428	50098	330	511	474	867	7578
RAB18	403	334	66607	270	503	891	473	5350
RAB1A	534	207	9797	364	433	1021	577	21346
RAB1B	1433	340	21759	322	498	363	2921	13406
RAB2A	434	463	43942	254	819	1313	470	184770
RAB3A	3101	777	119111	769	1293	4876	6889	204317
RAB3B	21228	18390	1684738	7492	21124	19350	23852	82842
RAB3C	609	478	173807	310	717	688	215	18137
RAB5A	155	136	21496	120	184	144	1226	45577
RAB5C	344	140	12092	143	196	162	375	21345
RAB7A	918	241	29105	179	688	270	1268	51977
RABL6	302	308	3059	294	335	417	7276	3951
RAC1	2356	1976	186544	1527	2360	2188	13953	256787
RACK1	315	252	4020	223	307	282	553	54510
RAE1L	1033	873	104616	669	812	1396	4702	122654
RALY	302	258	91809	245	1216	1247	2379	10646
RALYL	200	180	13364	185	252	200	235	4574
RAN	1270	1233	164651	1291	1454	1292	1333	23759
RAP2A	1887	1220	124464	1071	1430	1999	2231	21860
RASF5	181	165	7017	134	189	165	219	2344
RASK	1577	1424	164859	1324	1219	1527	12314	365792
RASM	222	185	2646	149	219	184	2211	2954
RB11A	1767	1550	734794	1097	1713	1662	288	7105
RB11B	2051	1609	5167137	1044	2413	2161	725	12034
RB6I2	367	333	88341	405	3273	345	3320	84900
RBCC1	196	169	48389	156	250	210	288	14089
RBM25	1000	12996	1202	14270	876	84	1128	1166
RBM39	3628	1495	20424	2288	1487	2059	6355	4501
RBM8A	876	715	157523	510	1017	770	939	23189
RBMX	2530	1271	328791	1404	4111	1353	31766	59694
RCN2	586	577	58967	524	689	605	8966	100080
RDH11	159	141	1949	103	165	157	195	24547
REEP2	349	322	25130	208	376	580	55	98311
REEP5	1678	1271	81944	765	1534	2632	1799	847058
RENR	142	114	9527	81	134	124	158	1469
RENT1	2499	872	1059899	2609	8685	2291	22110	751269
RETR2	116	108	1222	113	134	118	134	13968
RFIP2	1150	1528	156103	5750	2584	1180	66235	85583
RFIP3	27	24	321	22	36	26	34	8393
RFIP5	3414	3620	6665919	4349	4162	3177	29831	152825
RGPA1	61	55	1217	56	73	69	83	7791
RGRF1	152	149	1831	144	173	157	160	22784
RGRF2	492	526	62075	462	1527	646	11494	152350
RGS9	62	53	720	53	80	55	323	6152
RHBT2	231	208	57795	213	326	290	1584	24861
RHEB	589	314	35407	206	985	334	1123	55201
RHG21	127	259	2116	124	179	171	2832	13504
RHG23	386	353	57465	298	470	377	3617	70075
RHG32	1120	608	390003	508	4664	678	7330	147831
RHG33	35	29	457	24	38	32	44	1634
RHG39	712	476	76602	422	2159	509	12946	99653
RHG42	286	280	2896	228	342	327	6090	2847
RHOA	1713	1531	324558	623	1725	1735	22992	21395
RHOB	532	479	77744	328	487	2159	7355	71020
RHOG	2819	1308	333551	834	3684	4073	6551	421348
RICTR	141	123	2285	109	172	139	179	21232
RIMB2	116	118	10954	115	192	116	441	10536
RIMS1	3410	1629	564748	2954	16800	3040	34964	494766
RIMS2	906	406	66862	823	2336	975	4294	49861
RL10	52934	46424	34533611	19549	189099	78244	498422	37031091
RL10A	16245	2216	4832479	4556	35255	8560	164684	4712370
RL11	12460	5104	525790	3144	36148	23527	18586	1128632
RL12	24334	4707	7762362	3279	72472	8617	136379	4946019
RL13	12791	3263	3554899	8333	29865	11133	161646	5151732
RL13A	8797	1835	5965912	5175	51320	10327	143178	6891893
RL14	10690	6947	9629431	7511	59005	11702	245876	9714087
RL15	8506	1271	2897592	961	19754	4995	86936	3297544
RL17	6433	4425	3099920	4501	17488	7197	52999	2988412
RL18	9115	1115	5423268	2810	39193	5122	154913	4572387
RL18A	5685	1519	3037692	1411	16551	3621	39999	3742877
RL19	8143	5697	2986208	340	33346	6886	158171	3330106
RL21	4790	393	5177223	304	23553	5656	74874	3952011
RL22	25712	24217	1053169	11660	53972	78498	112581	2058489
RL22L	7191	696	8786	517	9646	13753	1113	258645
RL23	10236	5977	2112345	3121	25628	24383	35022	2361341
RL23A	10030	8740	4888096	10705	89204	40069	131693	4497333
RL24	8593	5411	4013551	1549	10328	12311	32638	3512805
RL26	2941	2418	2625392	3308	13816	7557	15923	3413190
RL27	19012	3719	8056820	3858	41743	21941	150495	7694908
RL27A	16744	3622	2458968	3073	29282	10219	82790	3749690
RL28	10735	2846	5154712	4276	39400	13498	52758	3720733
RL29	520	927	245643	545	684	1277	6320	112463
RL3	12194	4888	4432618	4591	15625	4675	134427	7841670
RL30	15296	2881	5126018	1169	55134	15388	119629	5816182
RL31	7542	4009	5655033	3359	9511	12115	52771	3407654
RL32	3293	1667	797932	2608	7163	3488	30100	676887
RL34	4932	1454	3352456	3536	10828	4320	56355	4214551
RL35	37055	23511	4210955	21677	130415	81369	82265	2339389
RL35A	14478	3633	6089328	3315	59601	11460	77358	4039352
RL36	4792	1679	1689056	1691	19658	6322	33882	425840
RL36A	2494	1353	594200	1630	16278	1526	19063	465905
RL38	19154	991	452354	748	28385	23715	8838	1593047
RL4	9715	1903	4558660	7666	35758	7486	192851	7490963
RL5	1727	1402	37483	1263	1925	1575	4726	1152989
RL6	11590	1549	2494206	6569	28089	6956	178145	9403831
RL7	11892	6805	4006606	6266	36628	6878	298770	10316068
RL7A	8901	1527	1942180	4892	21124	8623	34864	5098910
RL8	3748	7755	1617097	5661	16407	5813	120726	5659591
RL9	7955	4697	1309190	4919	7690	12083	41362	4617782
RLA0	3868	1350	3541766	1287	15190	1525	153243	3832397
RLA1	2805	2631	4773968	2061	21239	4253	42215	11191132
RLA2	7084	1114	2237195	3456	33455	3241	29124	4311667
RLGPB	224	171	2322	97	266	257	1352	40759
RM01	169	97	11251	71	116	105	2882	17276
RM02	150	131	48206	93	2438	136	7526	66862
RM03	121	112	6193	84	128	114	2372	1605
RM04	708	356	31603	579	863	711	7270	36445
RM09	307	269	66314	312	400	310	1185	31200
RM10	309	242	100445	157	363	349	109	1813
RM11	753	760	54272	674	816	769	5041	59607
RM12	2112	930	177295	864	6044	1865	14874	243202
RM13	699	544	92025	497	769	595	3990	56129
RM15	207	209	29220	180	231	211	604	2201
RM16	824	446	63338	273	953	921	662	2912
RM17	259	223	2691	200	2351	237	2348	2765
RM19	297	257	3920	230	311	263	2573	3697
RM20	249	205	22655	280	324	226	318	25746
RM21	629	469	129380	287	789	672	7225	50744
RM22	609	542	51002	385	636	613	918	9172
RM23	743	333	80159	270	875	807	590	3795
RM24	426	238	32901	169	264	437	1115	2854
RM27	334	301	25428	212	325	307	386	19207
RM28	322	287	2959	286	371	333	3630	40070
RM37	286	241	15065	197	280	238	2965	23891
RM38	152	136	26476	105	153	138	2230	1893
RM39	249	246	16096	249	285	261	3462	20664
RM40	252	209	23565	135	381	222	317	17793
RM41	315	276	34955	194	306	297	1317	3272
RM43	207	806	30931	1403	6109	2628	20377	108888
RM44	249	247	21752	254	277	293	1009	8823
RM46	1108	635	77948	482	718	1126	16959	85533
RM47	547	660	27647	415	704	518	1350	4910
RM49	371	305	27958	213	348	324	984	4650
RM50	663	625	60227	662	1188	688	973	39334
RM53	794	346	44717	227	837	368	2233	11570
RO52	80596	62179	12097	6056	6550	21492	647	23886
ROA0	227	223	6435	233	254	245	180	77104
ROA1	255	211	2472	258	321	234	509	78604
ROA2	748	579	36008	1065	646	778	7067	129283
ROA3	468	432	110151	3605	1388	989	7563	218770
ROAA	14825	5113	7121	251	590	557	1570	43320
ROGDI	564	505	58890	561	565	542	15900	264144
RP3A	2369	872	942426	957	6547	2522	105147	1608250
RPGF4	2954	1482	1187701	1223	14491	2836	52790	1192424
RPN1	780	701	29798	491	918	1065	8312	344842
RPN2	1062	707	9736	685	818	1772	1359	388173
RRBP1	624	352	127214	358	1705	594	6803	151889
RS10	5063	1391	305328	1060	13132	2221	6847	663665
RS11	13355	6762	2289685	6732	36452	26547	42943	3257139
RS12	831	666	10820	528	1255	536	547	424341
RS13	13904	3472	4703132	9692	58956	19464	94362	3045481
RS14	5134	3782	653922	4415	11598	13715	18601	2331321
RS15	6306	2110	1668248	1643	40996	19140	8378	2199458
RS15A	5755	3440	1798469	1155	24737	8997	43866	2709011
RS16	16295	6212	2685869	6471	43601	34488	57373	2986066
RS18	9299	3998	874684	5256	35251	29702	38258	2552624
RS19	5360	3839	51537	5901	10708	7717	8739	96857
RS2	8300	2553	1251619	12150	38754	23740	92509	3315132
RS20	7434	3265	345853	1161	6012	8617	9669	934309
RS23	14071	15907	2013174	3587	37402	42507	39684	1783501
RS24	2844	2769	2139774	2487	3413	3291	22486	2607289
RS25	555	3618	7209	7738	24987	10574	32821	156367
RS26	3055	2553	6325172	1712	3702	39305	1288	1351887
RS27A	6612	2917	797844	2104	16368	13537	20990	631064
RS28	2147	932	122419	3591	29868	12248	2505	10689
RS29	1541	1381	1049062	1296	56898	53105	34596	967240
RS3	13916	3719	413925	5075	8643	14153	56494	2103591
RS3A	4313	2055	1111173	1897	7028	5661	119401	4033901
RS4X	13431	6819	3821816	15545	40050	28479	242958	6223634
RS5	10437	6850	528646	5361	54966	37070	14677	402620
RS6	3082	2414	780022	4630	11451	5662	81402	3679362
RS7	54407	22724	1660015	23691	98000	86532	54207	1566907
RS8	5175	1626	1643236	1444	11577	2160	60166	3932132
RS9	21422	9069	8238257	9701	121980	42770	141357	6002665
RT02	1107	1033	98837	754	1166	1080	18626	134892
RT05	191	164	37058	294	251	193	4692	57864
RT06	738	608	136898	966	1707	644	3608	72519
RT07	614	161	95345	398	615	171	4213	45442
RT09	314	843	36223	289	398	300	6813	65690
RT10	547	526	115635	529	1388	777	4286	74733
RT11	332	276	72142	271	337	275	3360	45125
RT15	477	394	81581	337	658	457	5930	25729
RT16	374	215	63630	161	1075	224	2635	37670
RT17	491	485	111714	453	1852	509	367	5540
RT18B	342	281	3569	453	536	298	4080	31144
RT21	1163	1019	171869	930	1433	1094	1422	13292
RT22	791	541	82444	555	704	594	11871	99258
RT23	2203	1065	392767	678	4707	1835	11023	252518
RT25	235	198	97941	172	274	208	2775	40557
RT26	1450	819	277559	752	3494	1024	14170	142426
RT27	1186	982	304004	856	2198	1121	30975	244731
RT28	1452	284	298445	201	3032	1318	1658	2576
RT29	705	649	124953	469	733	707	14549	137882
RT30	641	54	62169	354	1324	545	11269	100860
RT31	722	513	86357	697	723	587	10194	38415
RT33	1088	339	478189	275	457	741	260	3872
RT34	1622	1068	334185	1142	3325	1911	16520	192896
RT35	133	166	32370	126	199	179	4408	56942
RT36	1097	928	358305	854	1122	1057	1387	39620
RTCB	15936	6429	1465431	59831	33296	48436	188111	1214672
RTN1	2334	1209	79176	1169	2635	3025	7955	607884
RTN3	1382	1313	30584	1000	1687	1594	11186	486758
RTN4	1445	855	50439	633	2064	1390	3957	388118
RTRAF	33494	8947	1760639	35236	54325	103946	78540	1003047
RU17	252	343	2415	346	384	431	4932	2500
RU2A	589	542	68981	347	572	566	1321	13532
RU2B	915	856	145795	557	969	1010	133	7859
RUFY3	401	339	72405	258	2191	328	6777	62687
RUN3A	622	487	143420	320	532	518	34	9471
RUVB1	102	87	8338	63	98	95	666	14854
RUXE	2613	1013	112161	892	3079	1415	4885	8322
RYR2	130	118	13884	90	979	194	866	19128
S10A8	123664	9130	75564	25310	24362	16912	3537	31674
S10A9	30975	4573	8091	19651	15878	7505	566	22451
S12A5	9558	3929	97181	5713	4678	6381	49744	263478
S27A1	211	189	2364	171	261	211	339	38301
S27A4	582	517	12329	434	639	592	4000	195280
S4A10	706	655	47956	455	1019	961	1132	157506
S4A4	6813	1835	1503000	5032	21345	8212	147601	6443048
S4A8	308	269	3393	237	363	284	962	23958
S61A1	333	297	48132	395	563	852	259	185524
S61A2	847	744	118781	555	873	1304	150	336194
S6A11	54	44	2812	60	69	553	905	24250
SAC1	1652	5674	73547	1282	1906	1608	6879	25803244
SAFB1	793	359	225879	389	423	2310	4020	11541
SAHH2	33195	26739	379868	115	32041	39722	2586184	370445
SAHH3	5781	850	61189	3775	6767	6171	521275	48597
SAM50	135	138	1413	135	150	138	2174	1806
SAP18	715	621	45684	302	376	767	401	7342
SC11C	277	242	21643	189	348	330	167	2625
SC22B	1294	1204	77878	396	1358	1258	2549	391230
SC61B	972	852	149865	988	1266	980	4063	311443
SCAI	2941	1030	621271	1661	7539	3684	23756	877800
SCAM5	1093	526	148420	278	419	383	601	5569
SCAP	143	133	1587	128	166	141	165	17690
SCFD1	46	39	490	34	53	41	56	7305
SCG2	50	44	3615	51	66	48	206	443
SCGR3	7223979	4462877	9890124	819391	8127089	8782003	3630564	3503074
SCGR4	116234	44435	287228	709	62066	215309	17202	182594
SCGR6	12383049	11524340	88261367	2627844	47113234	30431656	1025	1242318
SCGR7	17737661	12911991	37801125	6343752	19871519	23451132	1246743	33706691
SCGR8	7535791	7147908	8114169	672740	11142089	10040132	8858622	2396729
SCGRX	5063	45390	299426	3086	55538	6536	635	12728
SCPDL	119	126	1215	80	115	99	32	44211
SCRIB	3812	816	38542	703	1050	837	842911	30173
SCYL1	865	782	9565	349	526	979	36577	54746
SDF2L	134	135	7153	131	150	140	133	34348
SDHA	229	198	7614	184	250	216	2990	35912
SEC62	77	63	5069	85	100	69	96	46136
SEH1	231	202	24167	158	290	272	731	25687
SEP11	2445	2196	23827	512	749	3912	25806	1736990
SEPT2	996	872	19702	669	991	908	6805	799281
SEPT3	2495	2224	57829	817	2446	2675	28204	1880548
SEPT4	3815	1795	71009	1386	4235	3862	16493	3281389
SEPT5	4591	3176	335153	3204	6747	5447	99248	4108499
SEPT6	1396	1288	13428	968	1561	3348	19573	1333325
SEPT7	5605	3977	112119	2441	12747	6372	52311	6200221
SEPT8	4844	3875	105623	3945	7110	4140	37492	5327275
SEPT9	228	203	5957	213	303	615	2288	141598
SERA	127	101	1076	64	106	105	1636	1071
SERPH	106	113	5408	93	103	6313	643	11859
SF3A1	139	121	59063	107	612	128	703	3265
SF3A3	135	107	32334	69	365	112	151	3740
SF3B1	198	122	36437	137	821	217	869	7663
SF3B3	71	63	15505	48	71	68	95	1128
SF3B6	355	323	34133	231	349	338	413	12566
SFPQ	3214	2674	11920	118030	5117	8796	28207	61549
SGPL1	564	474	70767	318	595	716	7389	162179
SH2D5	119	109	8502	83	126	113	638	1401
SHAN1	592	898	190865	7832	4193	581	7305	128134
SHAN2	311	259	68769	502	1403	251	4521	63735
SHAN3	752	661	161775	662	3459	519	9141	125360
SHFL	246	222	79353	228	523	245	2639	115954
SHSA6	137	126	18050	295	135	135	2504	2178
SHSA7	1897	525	121242	2987	2598	2288	14429	220819
SI1L1	1386	825	371966	954	8506	852	29780	288650
SI1L2	165	103	14888	87	186	110	1138	12451
SI1L3	23	20	281	17	27	22	335	2007
SIN1	201	204	2128	195	229	207	967	34348
SIR2	1472	1138	31361	677	1031	2054	24465	70792
SKP1	1675	1039	350654	667	2010	1842	1455	118793
SKT	863	905	352940	462	5801	818	17223	159246
SLMAP	225	184	2458	148	250	207	745	24711
SMAP2	160	140	2085	108	167	159	202	10504
SMC3	23	19	153	26	29	21	29	1231
SMD1	1441	1284	339334	916	1852	1327	10417	15727
SMD2	3031	1777	211251	2165	2236	1945	8205	8080
SMD3	2459	1689	397345	328	10977	1285	20126	14430
SMU1	282	236	27487	194	276	235	118	1378
SNAB	460	346	14576	254	414	383	3036	71953
SNAG	542	514	8217	515	623	560	8573	23154
SND1	103	86	1320	37	57	53	81	9231
SNG1	3164	838	183853	776	1073	935	1082	457105
SNG3	2658	1450	128449	414	1740	2868	2550	232240
SNP25	20866	6237	285412	2024	8570	15579	21638	551640
SNP47	853	701	126459	619	1021	790	15756	109633
SNPH	244	220	2879	221	312	248	6371	2854
SNRPA	1033	965	2758	811	1199	1051	19319	2748
SNTA1	94	86	15981	152	97	88	791	19363
SNTB1	29	26	8681	31	78	30	741	22000
SOGA1	76	134	15587	61	225	70	110	1877
SOGA3	438	367	74054	323	1604	597	7662	207078
SORL	186	168	2067	144	223	177	102	26134
SPAS2	43	40	3224	34	57	42	52	9485
SPB12	1775	1139	2504	248	199	168	2030	2754
SPB4	365	1306	3872	3981	354	343	414	3830
SPCS2	629	611	69700	509	641	690	704	121371
SPF27	159	144	10520	103	156	151	358	7107
SPG7	367	312	92911	271	433	339	576	2255
SPHK2	79	66	1118	83	104	77	114	6924
SPIR1	428	360	35718	279	425	422	1544	61548
SPKAP	18	16	2698	15	24	17	25	1506
SPON1	67	59	677	513	87	65	75	689
SPRY3	189	194	35431	101	216	204	2473	39761
SPS2L	62	63	7369	62	69	63	691	62364
SPTB1	44	39	928	35	586	42	75	767
SPTB2	9466	4242	1405295	3684	94493	6806	47621	1448839
SPTN1	17267	7137	2331363	7178	179227	12872	81752	2168197
SPTN2	1204	833	114843	596	14165	858	4916	120816
SPTN4	140	131	22140	315	3012	229	1830	23125
SQOR	446	499	32885	334	549	489	3231	51697
SRBS1	703	604	56261	659	2339	702	29146	73370
SRBS2	477	390	104325	388	8147	414	11302	77084
SRC8	377	333	6428	289	469	350	11489	66443
SRCN1	9866	3127	6050188	4729	72406	6782	318339	2339875
SRGP1	40	36	452	36	51	40	2706	2335
SRPK1	251	218	2956	203	329	240	508	42757
SRPK2	372	320	32356	286	567	335	3765	117902
SRPRB	578	514	7097	398	655	563	710	96929
SRS10	390	324	57766	259	386	335	457	30726
SRSF3	3714	449	267563	3780	9905	8421	22981	579956
SSBP	1507	795	239284	545	2131	1762	17434	169255
SSBP2	207	185	41599	149	217	206	250	2576
SSRA	542	455	441490	580	2241	456	16185	7058
SSRD	6603	1310	1704487	942	16027	4867	12592	1106294
SSRG	1143	852	357488	521	1338	1220	2104	5566
STAU1	481	389	86790	406	513	469	5165	95809
STAU2	279	272	35395	249	380	276	2930	54845
STIM2	62	53	712	42	61	57	82	5167
STML2	689	592	12870	471	664	615	10149	44229
STMN3	975	654	129939	600	1820	711	1397	252416
STRN	362	310	5740	225	444	338	5263	84022
STRN3	352	310	4008	328	335	317	3813	72783
STRN4	180	157	2395	122	188	163	3123	42282
STRP1	85	66	680	56	76	72	772	9321
STT3B	524	471	6232	427	610	566	521	94187
STX1A	945	119	12134	117	954	130	10284	112880
STX1B	182976	98844	7685450	116135	119070	179992	706867	27475857
STX5	364	304	17744	204	441	385	231	29402
STXB1	17831	6468	390706	3578	11792	23004	63235	1711348
SUCA	114897	102405	27946032	87750	185469	235045	6067584	80600970
SUCB1	35921	7337	2564601	1475	6736	3872	129103	1046496
SUCB2	70	62	5324	48	70	63	91	866
SUCO	405	302	5065	274	446	269	534	93321
SUGP2	171	160	24166	104	198	177	181	1928
SV2A	1884	1728	82479	495	994	2554	2384	320329
SV2B	407	368	25552	250	411	401	478	75650
SYCP1	1579	719	3112	51	2317	1062	3242	629
SYDC	237	208	22854	189	240	220	2617	36887
SYEP	56	52	754	56	70	56	80	6607
SYFA	615	433	76370	305	1099	451	8686	122258
SYGP1	5387	2671	2093803	7992	34955	5852	67005	1420968
SYIC	43	43	438	40	50	45	32	3990
SYIM	502	432	117138	318	515	485	10100	34655
SYMPK	42	36	453	32	49	38	759	483
SYN1	17304	7838	1288955	3457	17093	24895	351944	2400103
SYN2	24496	8892	3555542	5761	39946	22498	514582	4991967
SYN3	250	220	23401	255	321	300	5364	53683
SYNE1	27	24	665	13	26	26	12	1699
SYNJ1	27	23	295	19	31	25	294	3512
SYNPO	15058	8960	96468	2616	1960	2803	56777	375736
SYPH	2988	3036	448227	774	2334	3594	9091	1729472
SYT1	6034	4985	203358	5979	5554	11163	43233	712688
SYT11	136	127	12385	107	180	135	164	8335
SYT12	549	493	46063	143	615	686	38	7726
SYT2	360	1167	2419	325	254	1615	425	68146
SYT7	671	261	28569	541	715	641	5822	8243
SYTL5	60	54	648	38	58	55	504	6711
SYUB	2953	4495	3296	423	3959	5694	773	3007
SYVC	87	78	1404	65	105	102	913	10047
T229A	81	72	656	83	106	80	112	4687
TADBP	1388	1111	436308	632	1374	1235	3640	57092
TAM41	586	480	60209	412	690	504	4200	14821
TANC2	1118	478	76641	383	2756	519	10762	120476
TAPT1	1034	937	10024	732	1103	1053	3075	10725468
TAU	566	129	39919	163	468	430	5277	92645
TBA4A	109483	1551	62578983	45286	478821	80345	2202905	60588416
TBA8	612	537	299449	412	1846	607	2756	277752
TBAL3	98	98	103753	104	714	105	13357	58547
TBB2A	361071	59407	88610073	58647	1280146	256698	961924	144591226
TBB2B	63345	16788	23864384	15846	139668	63263	1459879	33543652
TBB3	88207	21744	60776442	18274	298094	58297	2100859	59315595
TBB4A	243636	54193	109095523	58102	1100587	237033	5903243	100034780
TBB4B	124704	18653	61308467	30864	339768	91026	2641182	53384446
TBB5	231249	44432	134276019	55038	1130859	187352	3049985	136298807
TBB6	948	892	22410494	654	1101	1079	145573	8456798
TBG1	5192	3275	399954	2403	6306	5451	4862	113500
TBK1	92	82	1289	77	105	84	971	8723
TBL2	666	592	65896	559	849	680	3381	124608
TCPA	829	645	84294	549	955	783	10176	175204
TCPB	65	67	430	66	74	73	53	5925
TCPD	413	370	92874	332	785	381	10583	154948
TCPE	131	138	8232	107	158	162	256	24110
TCPG	366	326	4816	263	450	553	3822	92236
TCPH	603	564	124658	594	1239	990	10498	176592
TCPQ	132	105	1383	83	124	154	2429	13733
TCPZ	1219	1172	19854	1180	1410	2152	19134	244930
TDRD3	260	300	16299	273	417	1094	5636	39425
TECR	1737	1459	339303	1024	2971	2442	9743	743960
TENA	74	59	13457	45	525	62	98	1259
TENR	2348	1217	938470	364	3854	716	5141	95417
TERA	124	109	1342	85	142	141	761	11391
TGO1	35	16	4028	174	46	21	200	27935
THIKA	6282	1983	1075182	1950	21443	2086	248890	1317476
THIL	21685	5857	10305082	6392	11700	8488	671368	3609218
THIM	1866	1230	845656	1001	3620	3125	59772	582725
THIO	6398	3261	23881	432	3599	4427	7488	12096
THOC4	2937	647	6120	2713	725	3277	5242	7097
THTM	66	59	7053	68	87	66	92	616
TIF1B	318	276	21357	130	313	302	1641	42526
TIM44	87	75	911	67	99	79	527	927
TIM50	117	105	4479	80	118	113	1346	12817
TM214	73	1647	817	47	75	68	465	7868
TM35A	326	355	15110	289	379	326	308	68522
TM38A	2250	2092	327480	1722	2683	2936	1061	325650
TMCC2	256	194	2068	170	243	215	1089	25757
TMCC3	160	145	4517	106	160	154	947	20163
TMCO1	764	570	454558	349	6177	1364	1841	17044
TMED2	125	112	1473	106	196	191	171	8921
TMED9	1640	1610	37519	1646	1865	1698	1730	107005
TMM33	1543	908	73532	472	1791	1551	3241	299333
TMOD1	167	146	25255	109	371	164	204	14643
TMOD2	1665	1432	686843	1208	5344	1626	23029	781495
TMUB1	401	357	4327	329	476	376	1005	51627
TMX2	664	602	7025	526	771	623	2732	254701
TMX3	479	436	4250	330	493	456	557	198872
TMX4	135	110	1514	77	129	119	160	29783
TNIK	1772	852	60550	2676	3452	1688	11740	1177754
TNR6B	25	22	296	206	29	25	32	3228
TOP2B	104	97	1789	102	141	106	170	19026
TOP3B	297	264	6142	376	341	917	4616	34188
TPC10	115	53	1073	39	62	59	128	11019
TPC6B	246	204	15989	165	828	204	319	3270
TPIS	146	173	10900	108	209	128	1011	16229
TPM4	214	177	2627	142	1068	183	1229	36979
TPPC3	536	353	82272	205	334	370	1842	82858
TPPC5	817	753	94165	487	1028	1357	141	71674
TPPC9	203	207	2445	171	234	90	1798	29976
TPPP	7246	2485	50119	699	1102	6564	11885	58748
TR150	52	46	3209	43	70	396	66	607
TRA2B	216	176	31611	303	275	197	560	6184
TRAF3	163	141	2372	139	173	149	1652	20972
TRI32	87	87	909	68	100	93	55	5722
TRI46	1366	930	148261	1044	2534	1450	14856	394055
TRIM2	473	395	75950	291	573	552	13646	115037
TRIM3	2740	1639	600241	4198	8552	3659	139087	983989
TRIM9	639	577	144973	595	4060	642	17043	191844
TRIO	200	205	16005	211	249	223	1005	26020
TRM1L	49	40	312	47	63	43	148	2913
TRPC1	711	592	9627	454	871	855	68225	8353
TRPC4	756	1566	18762	1413	2393	1823	154355	21208
TRPC5	503	478	12016	401	619	674	67019	4877
TRPM3	568	101	836	28	33	61	26	4619
TRPM7	239202	99787	169119	63116	4068	3579	2984	37658
TRY1	47658	213642	502883	964007	263046	521509	29193	191114
TRY3	83106	111238	121264	97569	124844	138122	12651	81849
TRYP	60852097	54182481	114372274	46006132	82989342	77898459	10922149	114627264
TS101	334	315	22341	310	429	337	332	3649
TSC1	47	38	539	37	59	42	10	5198
TSC2	145	127	1704	105	152	144	184	14964
TSN9	414	393	3620	393	431	399	8913	4569
TSP4	74	67	826	58	86	73	86	9639
TTC3	81	67	732	59	82	75	67	6325
TTC7B	226	121	1724	94	139	151	1497	18713
TTLL1	49	41	8255	55	64	45	62	365
TUSC3	105	91	3748	68	106	98	808	32331
U2AF2	8261	1289	22970	4243	10021	14973	54197	66709
U520	16	14	66008	10	2829	380	1816	17935
U5S1	120	95	23782	70	285	106	149	1544
UBE3B	45	45	474	37	50	48	36	3392
UBL4A	180	148	21708	159	218	155	228	1837
UBP31	189	71	11708	55	83	75	131	20022
UBP46	215	186	15383	145	211	198	1396	43913
UBP5	293	296	3900	270	327	308	184	37738
UBP54	77	84	3929	75	89	89	128	5669
UFL1	97	96	1202	92	118	100	94	10223
UIF	175	156	10633	144	215	161	229	2592
UN13A	882	610	135529	672	4800	732	14382	192971
UN13C	187	176	37409	185	1090	287	2449	36098
USP9X	747	545	32295	4868	3057	6625	2998	30735
UT1	881	810	4838	738	1186	892	94	502339
VA0D1	506	425	71034	464	1163	1097	1372	352314
VAC14	56	50	1097	48	74	54	37	6707
VAMP1	381	370	25400	387	436	387	400	139103
VAMP2	9052	3070	500938	1235	10259	9990	2530	780617
VAMP4	4109	294	14169	227	333	299	320	4111
VAPA	2431	1091	132120	903	1246	2619	12510	704664
VAPB	1858	593	116254	458	687	1730	6360	1063480
VAS1	152	139	13234	107	157	143	210	7520
VATA	2001	1724	156668	734	2660	2430	24667	642469
VATB2	1477	785	94714	241	1241	1997	4805	249389
VATC1	126	115	1791	138	167	123	203	38246
VATD	241	219	2998	161	242	227	325	42371
VATE1	813	723	27046	667	966	762	3628	354555
VATH	227	202	2446	152	273	229	330	38051
VATL	1701	1114	117368	948	1297	7950	1619	16907
VCIP1	20	18	277	17	27	19	75	2288
VDAC1	1135	648	94651	577	754	703	73577	162832
VDAC2	498	411	18608	631	493	443	30352	62951
VDAC3	450	416	6053	1129	477	424	20736	21328
VGF	260	237	69646	183	276	290	40	48494
VGLU1	381	329	73276	295	455	620	877	150874
VIAAT	311	273	4593	223	333	479	395	77991
VIME	6850	4520	1156642	1574	47232	4457	138296	1168276
VP33A	79	79	833	60	88	87	746	944
VP33B	98	84	891	54	91	86	1380	896
VP9D1	32	29	4311	27	42	31	44	3842
VPP1	2934	2619	179293	1981	2640	3233	4748	935770
VPS11	40	34	2985	22	37	35	41	5205
VPS16	165	154	1827	127	184	167	1484	18237
VPS18	97	82	1240	68	98	90	583	9383
VPS28	281	260	19894	232	334	274	496	3273
VPS39	35	30	423	24	35	29	295	4630
VPS45	607	330	9655	304	436	347	727	89184
VPS4A	677	603	400754	491	1275	659	5827	162236
VTI1B	1091	141	9333	121	178	149	212	2395
VTNC	715	577	3440	89	130	698	30726	6167
VWA8	179	130	18223	93	146	141	2799	10374
WASF1	1131	989	101818	764	1151	1128	39112	182923
WASF3	114	97	4918	96	146	100	4314	15055
WDR34	148	479	1302	511	755	686	3827	1282
WDR37	1232	540	161269	923	6156	1158	31023	374374
WDR47	39	31	499	23	38	35	759	6404
WDR48	138	139	2175	111	170	155	236	23993
WDR7	1608	1505	366780	1221	5130	1430	29520	605152
WFS1	385	342	4536	304	495	393	1686	92665
WNK2	148	127	1795	125	189	130	331	20146
XP32	11034	673	7079	557	5743	8318	9364	8918
YBOX1	731	628	169788	640	868	657	5515	131731
YTDC2	214	173	3015	110	182	180	1210	25600
Z3H7B	108	116	1932	117	125	119	205	10146
ZA2G	1507	1107	3321	470	980	1667	1914	2994
ZC21A	1002	360	59776	409	1213	356	7668	117843
ZDH17	310	253	90858	189	296	276	809	74660
ZFY27	384	334	4256	175	500	487	920	40029
ZNFX1	28	29	492	28	32	32	208	2222
ZO1	400	343	51341	1286	3159	411	4881	82342
ZO2	1177	718	147141	3997	4859	2627	21241	359213

## Sheet: mb_CL47_RatioDistance
mouse brain, CL-47		Related to Figure 1C
Ratio Distance values calculated for affinity purifications and their respective control
	anti-M7a vs. TUC1	anti-M7a vs. TUC2	anti-M7a vs. TUC3	anti-M7a vs. TUC4	anti-M7b vs. TUC1	anti-M7b vs. TUC2	anti-M7b vs. TUC3	anti-M7b vs. TUC4	anti-M7c vs. TUC1	anti-M7c vs. TUC2	anti-M7c vs. TUC3	anti-M7c vs. TUC4	anti-M7d vs. TUC1	anti-M7d vs. TUC2	anti-M7d vs. TUC3	anti-M7d vs. TUC4
1433B	0.17947	0	0	0	0	0	0	0	1	1	0.43455	0.4173	0	0	0	0
1433E	0	0	0	0	0	0	0	0	1	1	0	0	0	0	0	0
1433F	0.22982	0	0	0	0.096661	0	0	0	1	1	0.21176	0.094812	0	0	0	0
1433G	0.26984	0.05616	0	0	0.015915	0	0	0	1	1	0.10585	0	0	0	0	0
1433T	0	0	0	0	0	0	0	0	1	1	0.10269	0.025422	0	0	0	0
1433Z	0.12245	0	0	0	0.0058981	0	0	0	1	1	0.2711	0	0	0	0	0
2AAA	0	0	0	0	0	0	0	0	0.69083	0.42632	0	0	0	0	0	0
A2MG	0.63242	0.068151	0.59869	0.80564	0.68424	0	0.63969	0.89023	0	0	0	0	0.65291	0	0.60728	0.87893
AAK1	0	0	0	0	0	0	0	0	0.042289	0	0	0	0	0	0	0
AAKG1	0	0	0	0	0	0	0	0	1	1	0.76452	0.93752	0	0	0	0
AAPK1	0	0	0	0.049924	0	0	0	0.067434	0	0	0	0.013251	0	0	0	0.00025139
AATM	0.021117	0	0	0	0	0	0	0	1	0.1229	0	0.28015	0	0	0	0
ABCD3	0.021106	0.021138	0	0	0.0094841	0	0	0	0	0	0	0	0	0	0	0
ABCE1	0	0	0	0	0	0	0	0	0.13296	0.095174	0	0	0	0	0	0
ABCF1	0	0	0	0	0	0	0	0	0.17631	0.19977	0	0	0.18369	0.19375	0	0
ABCF2	0	0	0	0	0	0	0	0	0.99422	1	0	0	0	0	0	0
ABD12	0.010314	0	0.10174	0	0.016602	0	0.12553	0	0.30292	0.14841	0.49753	0	0.068033	0.001712	0.1818	0
ABHD6	0	0	0	0	0	0	0	0	0	0	0	0	0	0	0	0
ABHEB	0	0	0	0	0	0	0	0	1	0.84762	1	1	0	0	0	0
ABHGA	0	0	0	0	0	0	0	0	0	0	0	0	0	0	0	0
ABI1	0	0	0	0	0	0	0	0	0.31892	0.24901	0	0	0	0	0	0
ABLM1	0	0	0	0	0	0	0	0	1	1	0	0	0	0	0	0
ABLM2	0	0	0	0	0	0	0	0	1	1	0.65302	0.90545	0	0	0	0
ABLM3	0	0	0	0	0	0	0	0	1	1	0.17845	0.18958	0	0	0	0
ACACA	0	0	0	0	0	0	0	0	0	0	0	0	0	0	0	0
ACAD8	0	0	0	0	0	0	0	0	1	1	0.72679	0.50239	0	0	0	0
ACBG1	0	0	0	0	0	0	0	0	0	0	0	0	0.2305	0.22691	0	0
ACD10	0	0	0	0	0	0	0	0	1	1	0.84902	0	0	0	0	0
ACLY	0	0	0	0	0	0	0	0	0.19137	0.10291	0	0	0	0	0	0
ACON	0.26519	0	0	0	0.22389	0	0	0	1	0.52341	0	0	0	0	0	0
ACOT9	0	0.019416	0	0	0	0	0	0	0.99229	1	0	0	0.0074265	0	0	0
ACSL3	0.078295	0.071161	0	0	0	0	0	0	0.53159	0.5101	0	0	0	0	0	0
ACSL6	0	0.10285	0	0	0	0	0	0	1	1	0	0	0	0	0	0
ACTB	0	0	0	0	0	0	0	0	1	1	0.28541	0	0	0	0	0
ACTC	0	0	0	0	0	0	0	0	0	0	1	0	0	0	0	0
ACTG	0	0	0	0	0	0	0	0	1	1	0.70454	0	0	0	0	0
ACTN1	0	0	0	0	0	0	0	0	0.58983	1	0	0	0	0	0	0
ACTN2	0	0	0.020981	0	0	0	0.032103	0	0	0.1012	0.13788	0	0	0	0.062	0
ACTY	0	0	0	0	0	0	0	0	1	1	0.25458	0	0	0	0	0
ACTZ	0	0.018628	0	0	0	0	0	0	1	1	0.19904	0	0	0	0	0
ADA22	0.051394	0.0010886	0	0	0.065755	0.0046739	0	0	0.084165	0	0	0	0.11584	0.049044	0	0
ADA23	0	0	0.00039861	0	0	0	0.012492	0	0	0	0	0	0	0	0.033251	0
ADDA	0.098368	0.16437	0	0	0	0.017913	0	0	0.46196	0.66722	0	0	0	0.015954	0	0
ADDB	0.15951	0.28367	0	0	0	0.014055	0	0	0	0.0148	0	0	0	0.090287	0	0
ADDG	0	0	0	0	0	0	0	0	6.8818e-05	0.35652	0	0	0	0	0	0
ADT1	0.028267	0.051484	0	0	0	0	0	0	1	1	0	0.083021	0	0	0	0
ADT2	0.11404	0	0	0.09065	0	0	0	0.014728	1	1	0	1	0.080689	0	0	0.051801
AFG31	0	0	0.081383	0.040528	0.036224	0.0093612	0.14756	0.10069	1	1	1	1	0.0236	0	0.14561	0.094483
AFG32	0	0	0	0.014339	0.0194	0.0082821	0	0.049974	1	1	1	1	0.03933	0.027178	0	0.071571
AG10B	0	0	0	0	0	0	0.024042	0	1	1	1	0	0	0	0.044884	0
AGAP1	0	0	0	0	0	0	0	0	0	0.17739	0	0	0.015841	0	0	0
AGAP2	0	0	0	0	0	0	0	0	0.47968	1	0	0	0	0	0	0
AGAP3	0	0	0	0	0	0	0	0	1	1	0.044493	0.01456	0	0	0	0
AGFG1	0	0	0	0	0	0	0	0	1	1	0	0	0	0.053043	0	0
AGFG2	0	0	0	0	0	0	0	0	1	1	0	0	0	0	0	0
AGO2	0.0088321	0	0	0	0	0	0	0	1	1	1	0	0	0	0	0
AHI1	0	0	0	0	0	0	0	0	0.47175	0.60207	0	0	0	0	0	0
AHNK	0.69471	0.7	0.65593	0.69788	0	0	0	0	0	0	0	0	0	0	0	0
AHNK2	0	0	0	0	0	0	0	0	1	1	1	1	0	0	0	0
AHSA1	0	0	0	0	0	0	0	0	1	1	1	0.73918	0	0	0	0
AINX	0	0.64694	0	0	0	0	0	0	0.28697	1	0.1649	0.044926	0	0	0	0
AJM1	0	0	0	0	0	0	0	0	1	1	0.75281	0.35947	0	0	0	0
AKAP5	0.095226	0.13504	0	0	0	0	0	0	0.041618	0.16506	0	0	0	0	0	0
AKAP9	0	0	0	0	0	0	0	0	0.75499	1	1	1	0	0.037443	0.0060958	0.017472
AKIB1	0	0	0	0	0	0	0	0	1	1	0.42211	0.16915	0	0	0	0
AL1B1	0	0	0	0	0	0	0	0	1	1	1	1	0	0	0	0
AL3A2	0	0	0	0	0	0	0	0	0	0	0	0	0	0	0	0
ALBU	0.33828	0	0.69316	0.87275	0.47902	0.022897	0.89243	1	0	0	0.75797	1	0.27632	0	0.74299	0.98034
ALDH2	0	0	0	0	0	0	0	0	1	1	0.22043	1	0	0	0	0
ALDOA	0.16757	0	0	0	0.23699	0	0	0	1	1	0.30163	0.23476	0.022641	0	0	0
ALG2	0	0	0	0	0	0.027827	0	0	1	1	0.48971	0	0	0	0	0
AMD	0	0	0	0	0	0	0	0	1	1	1	0.39239	0	0	0	0
AMOT	0	0	0	0	0	0	0	0	0	0	0	0	0	0	0	0
AMPD2	0	0	0	0	0	0	0	0	0.37029	0	0	0	0	0	0	0
AMPH	0	0	0	0	0	0	0	0	0	0	0	0	0	0	0	0
ANK1	0	0	0.0021846	0	0.0016043	0	0.023025	0	0	0	0	0	0.038187	0	0.058239	0
ANK2	0	0	0	0	0	0	0	0	0.232	1	0.2109	0	0	0	0	0
ANK3	0	0	0	0	0	0	0	0	0.46766	1	0	0	0	0	0	0
ANM5	0	0	0	0	0	0	0	0	0.093834	0.080219	0	0	0	0	0	0
ANO8	0	0	0	0	0	0	0	0	0	0	0	0	0	0	0	0
ANR63	0	0	0	0	0	0	0	0	0.73622	0.1318	0	0	0.7318	0.47292	0.22885	0.29077
ANS1B	0	0	0	0	0	0	0	0	1	1	0.39265	0.16222	0	0	0	0
AP1B1	0.043916	0	0	0	0	0	0	0	1	1	0	0	0.3532	0.24846	0	0
AP2A1	0	0	0	0	0	0	0	0	1	1	0.10901	0	0	0.22138	0	0
AP2A2	0	0	0	0	0	0	0	0	1	1	0	0	0.053859	0.1694	0	0
AP2B1	0	0	0	0	0	0	0	0	1	1	0.032773	0	0.0236	0.19978	0	0
AP2M1	0	0.031929	0	0	0	0	0	0	1	1	0.18906	0	0	0.16429	0	0
AP2S1	0	0	0	0	0	0	0	0	1	1	1	0.25389	0	0	0	0
AP3B2	0	0	0	0	0	0	0	0	0.087365	0.022691	0	0	0.20866	0.18102	0	0
AP3D1	0	0	0	0	0	0	0	0	0.03742	0	0	0	0.31121	0.28704	0	0
AP3M1	0	0	0	0	0	0	0	0	0.10794	0.13675	0	0	0	0	0	0
AP3M2	0.17385	0.15693	0	0	0.2579	0.2374	0	0	1	1	0	0	0.32829	0.30591	0	0
AP3S1	0	0	0	0.29644	0	0	0	0.28754	0	0	0	1	0	0	0	0
APC	0	0	0	0	0	0	0	0	1	1	0	0	0	0	0	0
APOD	0.55805	0.15921	0.39171	0.60389	0.037572	0	0	0.11814	0.97636	0	0.44818	1	0.66435	0.13448	0.43884	0.71881
AR6P1	0.010964	0	0.35247	0	0.022649	0	0.43046	0	0	0	0.79482	0	0	0	0	0
ARAF	0	0	0	0	0	0	0	0	0	0	0	0	0	0	0	0
ARC1A	0	0	0	0	0	0	0	0	0.96561	0.98642	0	0	0	0	0	0
ARF4	0	0	0.16719	0	0	0	0.23396	0	1	1	1	0	0	0	0.23926	0
ARF6	0.046736	0	0	0	0	0	0	0	1	1	1	0.19904	0	0	0	0
ARFG1	0	0	0	0	0	0	0	0	1	1	0	0	0	0	0	0
ARG33	0	0	0	0	0	0	0	0	1	1	0.78512	0.54614	0	0.27545	0	0
ARHG2	0	0.24331	0	0	0	0	0	0	1	1	0	0	0	0	0	0
ARHG7	0	0	0	0	0	0	0	0	1	1	0	0	0	0	0	0
ARHGB	0	0	0	0	0	0	0	0	0	0	0	0	0	0	0	0
ARL15	0.95631	0.98078	0.98058	0.96366	0.89118	0.92086	0.92548	0.90321	1	1	1	1	0.33453	0.36667	0.4206	0.3772
ARL8B	0	0	0	0	0	0	0	0	1	1	1	1	0	0	0	0.016599
ARP10	0	0	0	0	0	0	0	0	1	1	0.27864	0	0	0	0	0
ARP2	0	0	0	0	0	0	0	0	1	1	0	0	0	0	0	0
ARP3	0	0	0	0	0	0	0	0	1	1	0.77478	0	0	0	0	0
ARP5L	0	0	0.011037	0.012283	0	0	0	0.055751	0.96667	1	1	1	0	0	0	0.10238
ARPC2	0.27365	0.26393	0	0	0	0	0	0	0.96175	0.93256	0	0	0	0	0	0
ARPC4	0	0	0.0050473	0	0	0	0	0	0.63285	0.6114	0.62591	0.025361	0	0	0	0
ASCC3	0	0	0	0	0	0	0	0	0	0	0	0	0	0	0	0
ASPH	0	0	0	0	0	0	0	0	0	0	0	0	0	0	0	0
ASSY	0	0	0	0	0.019069	0.001187	0	0	1	1	0.15504	0	0.053608	0.034063	0	0
ASTRA	0	0	0	0	0	0	0	0	0	0	0	0	0	0	0	0
ASTRB	0	0	0	0	0	0	0	0	0.51825	1	0.16093	0	0	0	0	0
AT131	0	0	0	0	0	0	0	0	0	0	0	0	0	0	0	0
AT1A1	0.24739	0	0	0	0.21045	0	0	0	0	0	0	0	0	0	0	0
AT1A2	0.27137	0	0	0	0.21528	0	0	0	0	0	0	0	0	0	0	0
AT1A3	0.27832	0	0	0	0.28303	0	0	0	0.46822	0	0	0	0	0	0	0
AT1B1	0.099445	0	0	0	0.1245	0	0	0	0.32718	0	0	0	0	0	0	0
AT2A2	0	0.035	0	0	0	0	0	0	0.92086	1	0	0	0	0	0	0
AT2A3	0.099162	0.004332	0	0	0.12764	0.012497	0	0	0.29377	0	0	0	0	0	0	0
AT2B1	0.33136	0.073771	0	0	0.45452	0.14178	0	0	0.11692	0	0	0	0.11286	0	0	0
AT2B2	0.24508	0.17632	0	0	0.1004	0.016827	0	0	0.64092	0.42821	0	0	0	0	0	0
AT2B3	0	0	0	0	0	0	0	0	0	0.058752	0	0	0	0	0	0
AT2B4	0.11371	0.13194	0	0	0	0	0	0	0.92636	0.98406	0.35224	0	0	0.023865	0	0
AT5F1	0	0	0	0	0	0	0	0	1	1	0	0	0	0	0	0
AT8A1	0	0	0	0	0	0	0	0	0.65713	0.58398	0	0	0	0	0	0
ATAD1	0	0	0	0	0	0	0	0	1	1	1	1	0	0	0	0
ATAD3	0	0	0	0	0	0	0	0	1	1	0	0	0.1722	0.38176	0	0
ATAT	0	0	0	0	0	0	0	0	0.88836	0.92131	0	0	0	0	0	0
ATGA1	0	0	0	0	0	0	0	0	1	1	1	1	0	0	0	0
ATLA1	0	0	0	0	0	0	0	0	1	1	0.04684	0	0	0	0	0
ATLA2	0	0	0	0	0	0	0	0	0.89084	1	0.74766	0	0	0	0	0
ATPA	0.094349	0.12171	0	0	0	0	0	0	1	1	0.084897	0	0	0	0	0
ATPB	0.039553	0	0	0	0	0	0	0	1	1	0	0	0	0	0	0
ATPD	0	0	0	0.012725	0	0	0	0.027142	1	1	0	1	0	0.047154	0	0.075272
ATPG	0.12405	0.11956	0	0	0	0	0	0	1	1	0	0	0	0	0	0
ATPO	0	0	0	0	0	0	0	0	0.93087	0.3303	0	0	0	0	0	0
ATX2	0	0	0	0	0	0	0	0	0.82276	1	0	0	0.0088646	0.19499	0	0
ATX2L	0	0	0	0	0	0	0	0	0.46764	0.0042212	0	0	0	0	0	0
AUXI	0	0	0	0	0	0	0	0	1	1	0	0.21786	0	0	0	0
B3A3	0	0	0	0	0	0	0	0	1	1	0	0	0	0	0	0
BAF	0	0	0	0	0	0	0	0	1	1	1	1	0	0	0	0
BAG2	0	0	0	0	0	0	0	0	1	1	0.65927	0	0	0	0	0
BAG5	0	0	0	0	0	0	0	0	0.54986	0.85335	0	0	0	0	0	0
BAIP2	0	0	0	0	0	0.026081	0	0	1	1	0.085262	0.15784	0	0	0	0
BAP31	0.17346	0.021288	0	0	0	0.0048357	0	0	0	0	0	0	0	0	0	0
BASI	0	0	0	0	0.050224	0	0	0	0.53484	0.37623	0	0	0	0	0	0
BCAS1	0	0	0	0	0	0	0	0	1	1	0	0	0.39473	0.45631	0	0
BCKD	0	0	0.019211	0	0	0	0.060624	0	1	1	1	0	0	0	0	0
BCLF1	0	0	0.15364	0.25567	0	0	0	0	0.45129	0	1	1	0	0	0.052534	0.18246
BCR	0	0	0	0	0	0	0	0	1	1	0	0	0	0	0	0
BDH	0.17173	0.033334	0	0	0.18204	0.013968	0	0	0.89473	0.46641	0	0	0.19999	0.016109	0	0
BEGIN	0.070368	0.031773	0	0	0.0595	0.012626	0	0	1	1	0.77127	0.88895	0.047642	0	0	0
BIP	0.18323	0.093377	0	0	0	0	0	0	1	1	0	0	0.0094399	0	0	0
BORG4	0	0	0	0	0	0	0	0	0	0	0	0	0	0	0	0
BORG5	0	0	0	0	0	0	0	0	0	0	0	0	0	0	0	0
BRAF	0	0	0	0	0	0	0	0	0	0	0	0	0	0	0	0
BRI3B	0.16393	0.16875	0	0	0	0	0	0	1	1	0.7819	0	0	0	0	0
BRSK1	0	0	0	0	0	0	0	0	1	0.69694	0	0	0.48609	0.22402	0	0
BSCL2	0	0	0	0	0	0	0	0	0	0	0	0	0	0	0	0
BSN	0	0	0	0	0	0	0	0	0.9333	1	0.099948	0.24602	0	0	0	0
BTBDA	0	0	0	0	0	0	0	0	1	1	0.059179	0.5007	0	0	0	0
BTBDH	0.15208	0.15634	0	0	0	0	0	0	1	1	0	0.048912	0.94339	0.94953	0.29317	0.37565
C170B	0	0.18228	0	0	0	0	0	0	1	1	0	0.82877	0	0.2919	0	0
C1QA	0.83169	0.68623	0.36853	1	0.47588	0.29904	0	0.70239	0.11044	0	0	0.69017	0	0	0	0
C1QB	0.80808	0.71147	0.28787	0.84837	0.49397	0.37649	0	0.5578	0.0032001	0	0	0.21143	0	0	0	0
C1QC	0.68639	0.43549	0.37728	0.93231	0.44071	0.13589	0.090571	0.74874	0	0	0	0.58457	0	0	0	0
C1TM	0	0	0.088755	0.13415	0	0	0.14761	0.20431	1	1	1	1	0	0	0.1963	0.2599
C2C2L	0	0.074388	0	0	0	0	0	0	0	0.76623	0	0	0	0.083653	0	0
CA2D1	0	0	0.22044	0	0	0	0	0	0.35734	0.25656	1	0	0	0	0	0
CAC1A	0	0	0	0	0	0	0	0	0.72314	0.093606	0	0	0	0	0	0
CAC1B	0.40373	0.07822	0	0	0.49376	0.098529	0	0	1	0.23153	0	0	0.64058	0.20822	0.085791	0
CACB1	0	0	0	0	0	0	0	0	0.87976	0	0	0	0	0	0	0
CACB3	0.34732	0.049024	0	0	0	0	0	0	0	0	0	0	0.028718	0	0	0
CACB4	0	0	0	0	0	0	0	0	0.64271	0.32825	0	0	0.040901	0	0	0
CACO1	0	0	0	0	0	0	0	0	1	1	0.23239	0	0	0	0	0
CADH2	0	0	0	0	0	0	0	0	1	1	1	1	0	0	0	0
CALU	0	0	0	0	0	0	0	0	0.083477	0.12772	0	0	0	0	0	0
CALX	0.33721	0.063497	0	0	0	0	0	0	0.94544	0.097173	0	0	0.32349	0	0	0
CAMKV	0	0	0	0	0	0	0	0	0.28513	0.26766	0	0	0	0	0	0
CAMP1	0	0	0	0	0	0	0	0	1	0.36438	0.16846	0.038734	0	0	0	0
CAMP2	0	0	0	0	0	0	0	0	0.36247	0.32289	0	0	0	0	0	0
CAMP3	0	0	0	0	0	0	0	0	1	1	0	0	0.047317	0.072554	0	0
CAPON	0	0	0	0	0	0	0	0	0.86388	1	0	0	0	0	0	0
CAPR1	0	0	0	0	0	0	0	0	0	0	0	0	1	0.73249	0.82176	0
CAPS1	0	0	0	0	0	0	0	0	0	0	0	0	0	0	0	0
CAPZB	0	0.10795	0	0	0	0	0	0	1	1	0	0	0	0.15935	0	0
CARL2	0	0	0	0	0	0	0	0	0	0	0	0	0	0	0	0
CASP	0	0	0	0	0	0	0	0	1	1	1	1	0	0	0.020831	0
CASPE	0	0	0	0.39818	0	0	0	0.30012	0	0	0	0.56521	0	0	0	0.20292
CAZA1	0	0	0	0	0	0	0	0	1	1	0.26578	0	0	0	0	0
CAZA2	0	0	0	0	0	0	0	0	1	1	0.2772	0	0	0	0	0
CBLN1	0	0	0	0	0.099876	0.32766	0.1671	0	0.10421	0.6861	0.25586	0	0	0	0	0
CBPE	0	0	0	0	0	0	0	0	1	1	1	1	0	0	0	0
CC136	0	0	0	0	0	0	0	0	0	0	0	0	0	0	0	0
CC177	0	0	0	0	0	0	0	0	1	1	0.15514	0.13656	0	0	0	0
CCD47	0.13965	0	0.19643	0	0.19408	0	0.25764	0	0.38683	0	0.49568	0	0	0	0	0
CCSAP	0	0	0	0	0	0	0	0	0.89135	1	0	0	0	0	0	0
CD5L	0	0	0	0	0	0	0	0	0	1	0	0.33775	0	0	0	0
CDC42	0.36998	0.011413	0	0	0.10767	0	0	0	1	0.57683	0.075748	0	0	0	0	0
CDIPT	0	0	0	0	0	0	0	0	0.63814	0.66856	0.70696	0	0	0	0	0
CDK12	0	0	0	0	0	0	0	0	0	0	0	0	0	0	0	0
CDK17	0	0	0	0	0	0	0	0	0	0	0	0	0	0	0	0
CDK5	0	0	0	0	0	0	0	0	1	1	0	0	0	0	0	0
CDKL5	0.074953	0.2143	0	0	0	0	0	0	1	1	0.036525	0	0.10406	0.28923	0	0
CDS2	0	0	0	0	0	0	0	0	0.61639	0.73534	1	0	0	0	0	0
CDSN	0	0	0	0	0.35715	0	0	0.3558	0	0	0	0	0	0	0	0
CE170	0	0.010491	0	0	0	0.009287	0	0	0.81163	0.9796	0	0	0	0.041421	0	0
CELF2	0	0	0	0	0	0	0	0	1	1	1	0.32761	0	0	0	0
CEND	0	0	0	0	0	0	0	0	0	0	0	0	0	0	0	0
CENPV	0	0	0	0	0	0	0	0	1	1	0	0	0	0	0	0
CEP68	0	0	0	0.019867	0	0	0	0.020031	1	1	1	1	0	0	0	0.083896
CEP97	0.3021	0.28399	0.25834	0.071847	0	0	0	0	1	1	1	1	0	0	0	0
CH60	0.10919	0.0344	0	0	0	0	0	0	1	1	0	0.70173	0	0	0	0
CHM1A	0	0	0	0	0.058205	0.10896	0	0	1	1	1	0.82871	0	0	0	0
CHM2A	0.23124	0.3117	0	0	0	0	0	0	1	1	1	0.81736	0.28294	0.38987	0	0
CHM2B	0	0	0	0	0	0	0	0	1	1	1	1	0	0	0	0
CHM4B	0	0	0	0	0	0	0	0	1	1	1	0.84491	0	0	0	0
CHMP3	0	0.0061592	0	0	0	0.010825	0	0	1	1	1	0.55352	0	0.08797	0.032578	0
CHTOP	0	0	0	0.001305	0	0	0	0	0.88592	0.2944	0.86662	1	0	0	0	0
CIRBP	0.0049573	0	0	0	0.18447	0.17815	0.098769	0.14955	0.093559	0.07729	0	0.021223	0	0	0	0
CISD3	0.2061	0.41791	0.0058963	0.056822	0	0	0	0	1	1	1	1	0	0	0	0
CISY	0	0	0	0	0	0	0	0	1	1	0	1	0.090062	0.13538	0	0.092416
CK5P3	0	0	0	0	0	0	0	0	0	0	0	0	0	0	0	0
CKAP4	0	0.011291	0	0	0	0	0	0	1	1	0.28157	0	0	0	0	0
CKAP5	0	0	0	0	0	0	0	0	0.061455	0.14407	0	0	0	0	0	0
CLAP1	0	0	0	0	0	0	0	0	0.28632	0.37468	0	0	0.084354	0.12207	0	0
CLAP2	0	0.081408	0	0	0	0	0	0	0.96088	1	0	0	0	0.046608	0	0
CLCA	0	0	0	0	0	0	0	0	1	1	1	1	0.046108	0.10671	0	0
CLCB	0	0	0	0	0	0	0	0	1	1	1	1	0.10851	0.59077	0	0
CLD11	0.0032308	0	0.1376	0	0	0	0.00045853	0	1	0.55783	1	0	0	0	0	0
CLH1	0	0	0	0	0	0	0	0	1	1	1	1	0	0	0	0
CLIP2	0	0	0	0	0	0	0	0	0.37332	0.54847	0	0	0	0	0	0
CLMN	0.32177	0.38175	0.29568	0	0.20505	0.27783	0.18326	0	0	0	0	0	0	0	0	0
CLPT1	0	0	0.095045	0	0	0	0.10384	0	0	0	0.093076	0	0	0	0.03066	0
CLUS	0.13912	0.12201	0.20967	0.15008	0	0	0	0	1	1	1	1	0	0	0	0
CN37	0	0	0	0	0	0	0	0	1	1	0.48543	0	0	0	0	0
CNKR2	0	0	0	0	0	0	0	0	0.78714	1	0	0	0	0	0	0
CNNM1	0.65741	0.65173	0.55724	0.52138	0.57223	0.56528	0.45922	0.41264	0.080879	0.062404	0	0	0.46904	0.46136	0.35537	0.3007
CNNM2	0.82216	0.81743	1	0.78002	0.7999	0.79415	1	0.75026	0.094195	0.078479	1	0.05804	0.68018	0.67381	1	0.63246
CNNM3	0.95893	0.97046	0.89016	1	1	1	0.94047	1	1	1	0.93528	1	0.97871	0.99405	0.88759	1
CNNM4	0.87615	0.85998	0.89826	0.77938	0.86658	0.84694	0.89382	0.75056	0.34168	0.29076	0.49961	0.12713	0.78891	0.76737	0.8253	0.66667
CNTN1	0.0051127	0	0	0	0	0	0	0	0.8261	0.27401	0	0	0	0	0	0
CNTP1	0	0	0	0	0	0	0	0	0.34705	0.66603	0	0	0	0.131	0	0
CO1A1	0.032858	0	0.02813	0.13597	0.00078191	0	0	0.12647	0	0	0	0.032786	0	0	0	0.129
CO1A2	0.22155	0	0.21867	0.20327	0.3379	0	0.32506	0.31022	0	0	0	0	0	0	0.0023212	0
CO3	0.34392	0.32659	0.39389	0.3944	0	0	0.063797	0.052924	0.087554	0.033425	0.27015	0.26139	0	0	0	0.024406
CO4B	0.76036	0.75001	0.76451	0.7201	0	0	0	0	0	0	0	0	0	0	0	0
COF1	0	0	0.2079	0	0	0	0.10953	0	1	1	1	0.13925	0	0	0	0
COR1A	0	0	0	0	0	0	0	0	0	0	0	0	0	0	0	0
COR1C	0	0	0	0	0	0	0	0	1	1	0.2924	0	0	0	0	0
COR2A	0	0	0	0	0	0	0	0	0.26146	0.39863	0	0	0	0	0	0
COR2B	0	0.010252	0	0	0	0	0	0	1	1	0.5204	0	0	0	0	0
COX2	0	0	0	0	0	0	0	0	0.98374	1	0.23624	0	0	0	0	0
CP110	0.37473	0.62694	0.28604	0.022344	0	0	0	0	1	1	1	0.88124	0	0	0	0
CP46A	0	0	0	0	0	0	0	0	0	0	0	0	0	0	0	0
CPSF1	0.31596	0.056238	0	0.3682	0.013084	0	0	0	0	0	0	0	0.57918	0.23424	0	0.63368
CPSF5	0.026763	0	0	0.34725	0	0	0	0.092472	0	0	0	0.61039	0	0	0	0
CPSF7	0	0.029269	0	0	0	0.0014433	0	0	0	0	0	0	0.57696	0.59246	0	0.58176
CPT1C	0	0	0	0	0	0	0	0	0	0	0	0	0	0	0	0
CREL1	0	0	0	0	0	0	0	0	0	0	0	0	0	0	0	0
CRIP2	0	0	0	0	0	0	0	0	1	1	0	0	0	0.055685	0	0
CRYAB	0	0.079881	0	0	0	0	0	0	1	1	1	0	0	0	0	0
CRYM	0	0	0	0	0	0	0	0	0.69544	0.855	0.50574	0	0	0	0	0
CSDE1	0	0	0	0	0	0	0	0	0	0	0	0	0	0	0	0
CSK2B	0.022649	0.0099247	0.034777	0.048651	0.008837	0	0.024469	0.040805	1	1	1	1	0.0099266	0	0.026798	0.044685
CSKI1	0.012901	0.0018939	0	0	0.030495	0.017138	0	0	0.52149	0.48807	0	0	0.14194	0.1274	0	0
CSKI2	0	0	0	0	0	0	0	0	0.1194	0.12608	0	0	0.089487	0.092324	0	0
CSKP	0	0	0	0	0	0	0	0	0	0	0	0	0	0	0	0
CSRP1	0	0	0	0	0	0	0	0	1	1	0.40134	0	0	0	0	0
CTBP1	0	0	0	0	0	0	0	0	0.34199	0.43238	0	0	0	0	0	0
CTNA2	0	0.027503	0	0	0	0	0	0	1	1	1	1	0	0	0	0
CTNB1	0	0.037666	0	0	0	0	0	0	1	1	0.77461	0.83524	0	0	0	0
CTND1	0	0	0	0.17556	0	0	0	0.19701	1	1	1	1	0	0	0.12969	0.40852
CTND2	0	0.097092	0	0	0	0	0	0	1	1	0.062327	0.51911	0	0	0	0
CTRO	0	0	0	0	0	0	0	0	0	0.9775	0	0	0	0.50877	0.04668	0
CTTB2	0	0	0	0	0	0	0	0	1	1	0	0	0	0	0	0
CX6B1	0	0	0	0	0	0	0	0	0	0	0	0	0	0	0	0
CXA1	0.004219	0.36302	0	0	0	0	0	0	1	1	1	0.28877	0	0	0	0
CYB5	0	0	0	0	0	0	0	0	0.36298	0.26225	0.21892	0	0	0	0	0
CYFP1	0	0	0	0	0	0	0	0	0.015794	0	0	0	0	0	0	0
CYFP2	0	0	0	0	0	0	0	0	0.76827	0.7842	0	0	0	0	0	0
CYH1	0	0	0	0	0	0	0	0	1	1	0	0.66455	0	0	0	0
CYH2	0	0	0	0	0	0	0	0	1	1	0.022584	0.098007	0	0	0	0
CYTSB	0	0	0	0	0	0	0	0	0	0	0	0	0	0	0.077603	0
DAAM2	0	0	0	0	0	0.0027045	0.19987	0	0	0	0	0	0	0	0	0
DAB2P	0	0	0	0	0	0	0	0	0	1	0	0	0	0	0	0
DAD1	0	0.30695	0.30039	0	0	0	0	0	0	0	0	0	0.42654	0.84984	0.7934	0
DC1I1	0	0	0	0	0	0	0	0	1	1	0	0	0	0	0	0
DC1I2	0	0	0	0	0	0	0	0	1	1	0	0	0	0	0	0
DC1L1	0	0	0	0	0	0	0	0	1	1	0	0	0	0	0	0
DC1L2	0	0	0	0	0	0	0	0	0	0	0	0	0	0	0	0
DCD	0	0	0	0.76263	0	0	0	0.97376	0	0	0	1	0	0	0	1
DCE1	0	0	0	0	0	0	0	0	0	0	0	0	0	0	0	0
DCE2	0	0	0	0	0	0	0	0	0.14084	0.12345	0	0	0	0	0	0
DCLK1	0	0	0	0	0	0	0	0	1	1	0	0	0	0	0	0
DCLK2	0	0	0	0	0	0	0	0	0	0	0	0	0.062871	0.099526	0	0
DCTN1	0	0	0	0	0	0.011	0	0	1	1	0	0	0	0.015357	0	0
DCTN2	0	0	0	0	0	0	0	0	0.5203	1	0	0	0	0	0	0
DCTN3	0	0	0	0	0	0	0	0	1	1	0.81073	0	0	0	0	0
DCTN4	0	0	0	0	0	0	0	0	1	1	0	0	0	0.13038	0	0
DD19A	0	0	0	0	0	0	0	0	0	0	0	0	0	0	0	0
DDRGK	0	0	0	0	0	0	0	0	1	1	1	1	0	0	0	0
DDX1	0	0	0	0	0	0	0	0	0.73911	0.099998	0	0	0.62176	0.34795	0.053503	0.1207
DDX3X	0	0	0	0	0	0	0	0	1	1	0.12748	0	0.5376	0.49371	0.0062909	0
DDX41	0.042817	0.025581	0	0.025492	0.025844	0.0049032	0	0.0058156	0	0	0	0	0.64609	0.62355	0.51938	0.59133
DDX5	0	0	0	0	0	0	0	0	0.065343	0.27	0	0.24231	0.33135	0.41917	0.1593	0.39845
DDX6	0	0	0	0	0	0	0	0	1	1	1	0.092697	0.17245	0.080163	0.098938	0
DESP	0.49652	0.17578	0	0.52415	0.65135	0.26194	0.0042692	0.67705	0.02739	0	0	0.16058	0.54498	0.11885	0	0.57863
DGAT1	0	0	0	0	0	0	0	0	1	1	0.99653	0.86831	0	0	0	0
DGKB	0	0	0	0	0	0	0	0	1	1	0	0	0	0	0	0
DGKE	0	0	0	0	0	0	0	0	1	1	0	0	0	0	0	0
DGKI	0	0	0	0	0	0	0	0	1	1	0.097095	0	0	0	0	0
DGKZ	0	0	0	0	0	0	0	0	0.66465	0.33697	0	0	0.14751	0.0068407	0	0
DHB11	0	0	0	0	0	0	0	0	0	0	0	0	0	0	0	0
DHB12	0	0.072344	0	0	0	0.0053078	0	0	1	1	0.15223	0	0	0	0	0
DHB4	0	0.0096081	0	0	0.15668	0.23684	0	0	0.08038	0.28504	0	0	0.48536	0.57327	0	0
DHCR7	0	0	0	0	0	0	0	0	0	0	0	0	0	0	0	0
DHE3	0.15946	0.083291	0	0	0.0035388	0	0	0	1	1	0.44839	0	0	0	0	0
DHR13	0	0	0	0	0	0	0	0	0.074771	0.2232	0.031747	0	0	0	0	0
DHX15	0	0	0	0	0	0	0	0	0	0	0	0	0	0	0	0
DHX30	0	0	0	0	0	0	0	0	1	1	0.11161	0	0	0	0	0
DHX36	0	0	0	0	0	0	0	0	1	1	0.45737	0	0	0	0	0
DHX57	0	0	0	0	0	0	0	0	0	0	0	0	0	0	0	0
DHX9	0	0	0	0	0	0	0	0	1	1	0.89124	1	0	0.018176	0	0
DIRA1	0	0	0	0	0	0	0	0	1	1	0.77909	0	0	0	0	0
DIRA2	0	0	0	0	0.0042062	0	0	0	1	1	0.66807	0	0	0	0	0
DJB11	0.1914	0	0	0	0	0	0	0	1	1	0.29417	0	0	0	0	0
DJB12	0	0	0	0	0	0	0	0	0	0.13926	0	0	0	0	0	0
DJB14	0	0	0	0	0	0	0	0	0.014039	0	0	0	0	0	0	0
DJC13	0	0	0	0	0.080658	0.022803	0	0	0.10288	0	0	0	0	0	0	0
DJC16	0	0	0	0	0	0	0	0	1	1	0.075678	0	0	0	0	0
DLDH	0.036883	0	0	0	0	0	0	0	1	1	0.8234	1	0	0	0	0
DLG1	0	0	0	0	0	0	0	0	1	1	0	0	0.096471	0.077233	0	0
DLG2	0	0.13094	0	0	0	0	0	0	1	1	0.85681	0.48964	0	0	0	0
DLG3	0	0.02928	0	0	0	0	0	0	1	1	0	0	0.0028836	0.26569	0	0
DLG4	0	0	0	0	0	0	0	0	1	1	0.98654	0.32144	0	0.0037266	0	0
DLG5	0	0	0	0	0	0	0	0	1	1	0.20875	0.026867	0	0	0	0
DLGP1	0	0	0	0	0	0	0	0	0.76731	1	0	0.047391	0	0.22792	0	0
DLGP2	0	0	0	0	0	0	0	0	1	1	1	1	0	0	0	0
DLGP3	0	0	0	0	0	0	0	0	1	1	0.34795	0.23429	0	0	0	0
DLGP4	0	0	0	0	0	0	0	0	0.80564	1	0	0.01065	0	0	0	0
DLRB1	0	0	0	0	0.031095	0	0	0.0083291	1	0.98022	0.52081	1	0	0	0	0
DMD	0	0	0	0.24024	0	0	0	0	0	0.21497	0	1	0.55214	0.72582	0.4581	1
DMWD	0	0	0	0	0	0	0	0	1	1	0	0	0	0	0	0
DMXL2	0	0	0	0	0	0.034592	0	0	1	1	0	0	0	0	0	0
DNJA1	0	0	0	0	0	0	0	0	0.89669	1	0	0	0	0	0	0
DNJA2	0	0	0	0	0	0.028178	0	0	0.54012	1	0	0	0	0	0	0
DNJA3	0	0	0	0	0	0	0	0	1	1	0.0074343	0	0	0	0	0
DNJA4	0	0	0	0.0087299	0	0	0	0.030969	0	0	0	0.0017496	0	0	0	0.033589
DNJB2	0	0	0	0	0	0	0	0	1	1	0.81573	0	0	0	0	0
DNJB4	0	0	0	0	0	0	0	0	0	0	0	0	0	0	0	0
DNJB5	0	0	0	0	0	0	0	0	1	1	0	0	0	0	0	0
DNJB6	0	0.14342	0	0	0	0	0	0	1	1	0.30853	0.043831	0	0	0	0
DNJC5	0	0	0	0	0	0	0	0	0.81646	0.72292	0.53149	0	0	0	0	0
DNM1L	0	0	0	0	0	0	0	0	0	0	0	0	0	0	0	0
DOCK3	0	0	0	0	0	0	0	0	1	1	0	0	0	0	0	0
DOCK4	0	0	0	0	0	0	0	0	0	0	0	0	0	0	0	0
DOCK7	0	0.0050484	0	0	0	0.01709	0	0	0.074049	1	0	0	0	0.068791	0	0
DPOE1	0	0	0	0	0	0	0	0	0	0	0	0	0	0	0	0
DPP6	0.016898	0	0	0	0.025837	0	0	0	0	0	0	0	0	0	0	0
DPYL2	0.34491	0	0	0	0.094632	0	0	0	1	0.44675	0	0	0.26957	0	0	0
DREB	0	0	0	0	0	0	0	0	1	1	0.16139	0	0	0	0	0
DRG1	0	0.0079198	0	0	0	0	0	0	0	0	0	0	0	0	0	0
DSC1	0	0.14989	0	0.62339	0	0.11368	0	0.68546	0	0	0	1	0	0	0	0.55684
DSG1	0.013168	0.04197	0	0.33345	0	0	0	0.1894	0	0	0	0	0	0	0	0.22953
DTNA	0.090175	0	0	0	0.11535	0.004512	0	0	1	1	0	0	0	0	0	0
DYH8	1	0.10636	1	1	1	0.093977	1	1	0	0	0	0	1	0	0.96143	1
DYHC1	0	0	0	0	0	0.056235	0	0	0.98194	1	0	0	0	0.010634	0	0
DYL1	0	0	0	0	0	0	0	0	1	1	0.87675	0	0.00016962	0	0	0
DYL2	0	0	0	0	0	0	0	0	1	1	1	0	0	0	0	0
DYN1	0	0	0	0	0	0	0	0	0.23901	0.14042	0	0	0	0	0	0
DYN3	0.011286	0	0	0	0	0	0	0	0.14295	0.081253	0	0	0	0	0	0
DYST	0	0	0	0	0	0	0	0	0	1	0	0	0	0.044675	0	0
DZAN1	0	0	0	0	0	0	0	0	1	1	0	0.019474	0	0	0	0
E41L1	0	0	0	0	0.17938	0.16698	0	0	1	1	0.11556	0.1429	0.010096	0	0	0
E41L2	0	0	0	0	0	0	0	0	1	1	0.51667	0	0	0	0	0
E41L3	0	0	0	0	0	0	0	0	1	1	0.18451	0	0	0	0	0
E41LB	0	0	0	0	0	0	0	0	0	0.10989	0.20348	0	0	0	0	0
EAA1	0	0	0	0	0	0	0	0	0	0	0	0	0	0	0	0
EAA2	0.13903	0	0	0	0.071606	0	0	0	0	0	0	0	0	0	0	0
ECHA	0	0.091866	0	0	0	0	0	0	1	1	0	0	0	0	0	0
ECHB	0	0	0	0	0	0	0	0	1	1	0	0	0	0	0	0
ECHM	0.21539	0	0	0	0	0	0	0	1	1	0	0.035083	0	0	0	0
EF1A1	0	0.17698	0	0	0	0	0	0	1	1	0.71235	0	0	0	0	0
EF1A2	0	0	0	0	0	0	0	0	0.71977	1	0	0	0	0.065146	0	0
EF1D	0	0	0	0	0	0	0	0	0.44467	0.41402	0	0	0	0	0	0
EF1G	0	0	0	0	0	0	0	0	0.36064	0.95545	0	0	0	0	0	0
EF2	0.23977	0.12328	0	0	0.14031	0	0	0	0.63246	0.27164	0	0	0.21676	0.061972	0	0
EFHD2	0	0	0	0	0	0	0	0	0.75828	0.75033	0	0.37511	0	0	0	0
EFTU	0.098546	0.25225	0	0	0	0	0	0	1	1	0	0.50923	0	0.094826	0	0
EIF3B	0	0	0	0	0	0	0.032847	0	0	0	0	0	0	0.15071	0.1657	0
ELAV1	0	0	0	0	0	0	0	0	1	1	0.83042	0	0	0	0	0
ELAV2	0	0	0	0	0	0	0	0	1	1	0.79153	0	0	0	0	0
ELAV3	0	0	0	0	0	0	0	0	1	1	0.83573	0.032268	0.53531	0.066171	0	0
ELAV4	0	0	0	0	0	0	0	0	1	1	0.78063	0	0	0	0	0
ELMO1	0	0	0	0	0	0	0	0	0	0	0	0	0	0	0	0
ELOB	0.27535	0	0	0.29101	0.1129	0	0	0.13966	1	0.54296	0.10218	1	0	0	0	0
ELP1	0	0	0	0	0	0	0	0	0	0	0	0	0	0	0	0
ELP3	0	0	0	0	0	0	0	0	1	1	0.087792	0	0	0	0	0
EMC1	0	0	0	0	0	0	0	0	1	1	0	0	0	0	0	0
EMC10	0	0	0	0	0	0	0	0	1	1	0	0	0	0.22895	0	0
EMC2	0.14869	0.20179	0	0	0	0	0	0	1	1	0	0	0	0	0	0
EMC3	0	0	0	0	0	0	0	0	1	1	0.1184	0	0.082805	0.047833	0	0
EMC4	0	0	0	0	0	0	0	0	1	1	1	0	0	0	0	0
EMC7	0	0	0	0	0	0	0	0	1	1	0.58362	0	0	0	0	0
EMC8	0	0	0	0	0	0	0	0	1	1	1	0	0	0	0	0
EMD	0	0	0	0	0	0	0	0	0	0.050516	0	0	0	0	0	0
ENASE	0	0	0	0	0	0	0	0	0	0	0	0	0	0	0	0
ENDD1	0	0	0	0	0	0	0	0	0	0	0	0	0	0	0	0
ENOA	0	0	0	0	0	0.001504	0	0	0.86455	1	0	0	0	0	0	0
EP15R	0	0	0	0	0	0	0	0	1	1	0.24076	0	0.014632	0.11517	0	0
ERC2	0	0	0	0	0	0	0	0	0.992	1	0.6079	0.311	0	0.34411	0	0
ERH	0	0	0.12836	0	0	0	0	0	1	0.93789	1	0.21289	0	0	0	0
ERLN2	0	0	0	0	0	0	0	0	0.14199	0.96328	0	0	0	0	0	0
ERMP1	0	0	0	0	0	0	0	0	0	0	0	0	0	0	0	0
ESYT2	0	0	0	0	0	0	0	0	0	0	0	0	0	0	0	0
EWS	0.099157	0	0	0.28457	0	0	0	0	0	0	0	0	0.72249	0.29037	0	0.93247
EXOC4	0	0	0.081559	0	0	0	0.087008	0	0.49647	0.6666	0.72355	0	0	0	0.17933	0
EXOG	0	0	0	0	0	0	0	0	0	0	0	0	0	0	0	0
F120A	0	0	0	0	0	0	0	0	1	1	0.59141	0	0.55757	0.46923	0.24338	0
F120C	0	0	0	0	0	0	0	0	1	1	0.59064	0.16162	0.61422	0.39752	0.019122	0
F241B	0	0	0	0	0	0	0	0	0.083477	0.12772	0	0	0	0	0	0
FA81A	0	0	0	0	0	0	0	0	1	1	1	0.33046	0	0	0	0
FA98A	0	0	0	0	0	0	0	0	0.85027	0.61839	0	0.3616	0.20382	0.10411	0	0.013855
FA98B	0	0	0	0	0	0	0	0	1	1	0.204	0	0.33458	0.32273	0	0
FAAH1	0	0	0	0	0	0	0	0	0	0	0	0	0	0	0	0
FABP5	0.37357	0.036455	0.33996	0.34325	0.69522	0.28601	0.629	0.64303	0	0	0	0	0.05141	0	0.035962	0.028764
FAF2	0	0	0	0	0	0	0	0	0	0	0	0	0	0	0	0
FAHD1	0	0	0	0	0	0	0.035901	0	1	1	1	0.94739	0	0	0.08234	0
FARP1	0	0	0	0	0	0	0	0	1	1	0	0	0	0.0024573	0	0
FAS	0	0	0	0	0	0	0	0	0.084974	0.28737	0	0	0	0	0	0
FBSP1	0	0	0	0	0	0	0	0	1	1	0.53066	0.49457	0	0	0	0
FBW1B	0	0	0	0	0	0	0	0	0	0	0	0	0	0	0	0
FBX41	0	0	0	0	0	0	0	0	1	1	0.29487	0	0	0.0016825	0	0
FETA	0.43866	0.12146	0.65239	0.72764	0.37372	0	0.63479	0.72476	0	0	0	0.03525	0	0	0	0
FETUA	1	0	1	1	1	0	1	1	1	0	1	1	0.94257	0	0.87019	1
FHL1	0	0	0	0	0	0	0	0	1	1	0	0	0	0	0	0
FIBA	0	0.23876	0	0.026973	0	0	0	0	0	1	0.79347	1	0	0.10738	0	0
FIBB	0	0.39496	0	0.10352	0	0	0	0	0.28173	1	0.96082	1	0	0	0	0
FIBG	0	0.25647	0.24647	0.076854	0	0	0.019109	0	0.3976	1	1	1	0	0	0.043034	0
FILA	0.35289	0.32295	0	0.85823	0.32685	0.29047	0	0.93645	0	0	0	1	0	0	0	0
FILA2	0.0079439	0.083607	0	0.46625	0	0	0	0.02241	0	0	0	0	0	0	0	0
FINC	0.15992	0	0.1341	0.1806	0	0	0	0.0082008	0	0	0	0.041503	0	0	0	0
FIP1	0.0044799	0	0	0.036661	0.0058576	0	0	0.044531	0	0	0	0	0.11066	0.097047	0	0.14721
FKBP8	0	0	0	0	0	0	0	0	0	0	0.96703	0	0	0	0	0
FLII	0	0	0	0	0	0	0	0	0	0	0	0	0	0	0	0
FMNL2	0	0	0	0	0	0	0	0	1	1	0.23614	0	0	0.13174	0	0
FMR1	0	0	0	0	0	0	0	0	1	0.42534	0.23344	0	0.028622	0	0	0
FRM4A	0	0	0.31999	0	0	0	0.38322	0	0	0	0.79468	0	0	0	0.46227	0
FRS1L	0	0	0	0	0	0	0	0	0.41098	0.5339	0	0	0	0	0	0
FRY	0	0	0	0	0	0	0	0	0.82637	1	1	0.68506	0	0	0	0
FRYL	0	0	0	0	0	0	0	0	1	1	1	0.85729	0	0	0	0
FUMH	0	0	0	0	0	0	0	0	0	0	0	0	0	0	0	0
FUS	0	0	0	0.083528	0	0	0	0.0080405	0	0	0	0	0.64617	0.39861	0	0.89725
FXR1	0	0	0	0	0	0	0	0	1	0.45315	0	0	0	0	0	0
FXR2	0	0	0	0	0	0	0	0	0.98032	0.49487	0	0	0.024455	0	0	0
G3BP1	0	0	0	0	0	0	0	0	0	0	0.55323	0	0.87651	0.79118	1	0.2886
G3BP2	0.0051849	0	0	0	0	0	0	0	0	0	0	0	1	0.44806	0.51679	0.12479
G3P	0	0	0	0	0	0	0	0	1	1	0.39257	0	0	0	0	0
G45IP	0	0	0	0	0.020101	0	0	0	1	1	0	1	0.081707	0	0	0
GABR2	0	0	0	0	0	0	0	0	1	1	0	0	0	0	0	0
GABT	0.071761	0.018333	0	0	0	0	0	0	1	1	0	0	0	0	0	0
GAL3A	0.29585	0.012424	0	0	0	0	0	0	1	1	0.30561	0	0	0	0	0
GALC	0	0	0	0	0	0	0	0	1	1	0	0.93315	0	0	0	0
GAR1	0	0	0	0	0	0	0	0	1	1	0	1	0	0	0	0
GASP1	0	0.33682	0	0	0	0	0	0	0.81111	1	0	0	0	0	0	0
GBB1	0	0	0.057907	0.0024448	0	0	0.079207	0.013183	1	1	1	1	0	0	0.097202	0.025977
GBF1	0	0	0	0	0	0	0	0	0	0.0032735	0.15238	0	0	0	0	0
GBRA1	0	0	0	0	0	0	0	0	0.94457	1	0	0.77374	0	0	0	0
GBRB2	0.15487	0.27256	0	0	0.07108	0.21395	0	0	0.39383	0.75927	0	0	0	0.04373	0	0
GBRB3	0.15666	0.29752	0	0	0	0	0	0	0.52371	0.96122	0	0	0.25201	0.43923	0	0.025244
GBRG2	0	0	0	0	0	0	0	0.23275	0.95141	1	0	1	0	0	0	0
GCN1	0	0	0.093487	0	0	0	0.1159	0	0	0	0.14166	0	0	0	0.10068	0
GCP2	0	0	0	0	0	0	0	0	1	1	0.11997	0	0	0	0	0
GCP3	0	0	0	0	0	0.0046064	0	0	0.35433	0.62325	0	0	0	0.047184	0	0
GCP4	0	0	0	0	0	0	0	0	1	1	0.036553	0	0	0	0	0
GCP5	0	0	0	0	0.013454	0	0	0	0	0	0	0	0	0	0	0
GCP6	0	0	0	0	0	0	0	0	0.49594	0.46943	0.26277	0	0	0	0	0
GDPD1	0	0	0	0	0	0	0	0	0	0	0	0	0	0	0	0
GELS	0.037077	0.064147	0.058756	0	0	0	0	0	0.057291	0.1413	0.11244	0	0	0	0	0
GEMI5	0	0	0	0	0	0	0	0	0	0	0	0	0	0	0	0
GEPH	0	0	0	0	0	0	0	0	0.51806	1	1	0.67934	0	0.23216	0	0
GFAP	0	0.099913	0	0	0	0	0	0	0.030899	1	0.19583	0	0	0	0	0
GHC1	0	0	0	0	0	0	0	0	0	0	0	0	0	0	0	0
GHC2	0	0	0	0	0	0	0	0	0.015794	0	0	0	0	0	0	0
GIT1	0	0	0	0	0	0	0	0	0.89856	1	0	0	0	0.13608	0	0
GLNA	0	0	0	0	0	0	0	0	1	1	0.096674	0	0	0	0	0
GLRX5	0	0	0	0	0	0	0	0	1	1	1	1	0	0	0	0
GLSK	0	0	0	0	0	0	0	0	0.80388	0	0	0	0	0	0	0
GNAO	0.28257	0	0	0	0.29228	0	0	0	1	0.40925	0	0	0	0	0	0
GNB5	0	0	0	0	0	0	0	0	0.99871	0.90545	0	0	0	0	0	0
GOGA3	0	0.0041043	0	0.0042398	0	0	0	0	0.16131	1	0.5947	1	0	0	0	0
GPAA1	0	0	0	0	0.2212	0.22232	0.16504	0	0	0	0	0	0.25403	0.25528	0.19017	0
GPD1L	0	0	0.4208	0	0	0	0.51306	0	1	1	1	0	0	0	0.50365	0
GPI8	0	0	0	0	0	0	0.032574	0	0	0	0	0	0	0	0	0
GPM6A	0.40453	0.062464	0.084257	0.65591	0.2517	0	0	0.56176	0.6045	0	0	1	0	0	0	0
GPX1	0.59324	0.58305	0.63775	0.18912	0	0	0	0	0.98725	0.95619	1	0	0	0	0	0
GPX4	0	0	0	0	0	0	0	0	1	1	0.77975	0	0	0	0	0
GRASP	0	0	0	0	0	0	0	0	1	1	0.93275	0.024023	0	0	0	0
GRDN	0	0.0037933	0	0	0	0	0	0	0.67772	1	0.33593	0.072935	0	0.068835	0	0
GRIA1	0	0	0	0	0	0	0	0	0	0	0	0	0.37442	0.49033	0	0
GRIA2	0.010692	0	0	0	0.061151	0.012079	0	0	0.77631	0.65195	0	0	0.30276	0.24922	0	0
GRIA3	0	0	0	0	0	0	0	0	0.15095	0.22794	0	0	0	0	0	0
GRP1	0	0	0	0	0	0	0	0	0.35168	0.31268	0	0	0	0	0	0
GRP2	0	0	0	0	0	0	0	0	0	0	0	0	0	0	0	0
GRP75	0.082364	0.06583	0	0	0	0	0	0	1	1	0	0.35717	0	0	0	0
GSDMA	0.51182	0.018561	0.0080705	0.55034	0.39894	0	0	0.45081	0.34469	0	0	0.47408	0	0	0	0
GSK3B	0	0	0	0	0	0	0	0	1	1	0.096224	0	0	0	0	0
GSLG1	0	0	0	0	0	0	0	0	0.77889	0.96563	0.52518	0	0	0	0	0
GYS1	0	0	0	0	0	0	0	0	1	1	0.56406	0.6841	0.81064	0.5351	0.1827	0.22335
H10	0.28958	0.3177	0	0	0.33915	0.37332	0	0	1	1	0.41243	0	0	0	0	0
H4	0.21333	0.02607	0.32074	0.061046	0.09542	0	0.23351	0	0.9637	0.38385	1	0.44188	0.014484	0	0.17152	0
HACD2	0	0	0	0	0	0	0	0	1	1	1	0.83863	0	0	0	0
HACD3	0	0	0	0	0	0	0	0	0.55265	0.46769	0	0	0	0	0	0
HAP1	0	0	0	0	0	0	0	0	0.42354	0.59589	0	0	0	0	0	0
HAX1	0	0	0	0	0	0	0	0	1	0.86611	1	0	0	0	0	0
HBA	0.22681	0	0.4201	0.15543	0.24121	0	0.47141	0.15458	0	0	0.2955	0	0	0	0	0
HCD2	0.21312	0	0	0	0.15423	0	0	0	1	1	0	0.22681	0	0	0	0
HCN1	0	0	0	0	0	0	0	0	0	0	0	0	0	0	0	0
HCN2	0	0	0	0	0	0	0	0	0.67199	0.60345	0	0	0	0	0	0
HDA11	0	0	0	0	0	0	0	0	0	0	0	0	0	0	0	0
HECW1	0	0	0	0	0	0	0	0	0	0	0	0	0.029654	0	0	0
HEMH	0	0	0	0	0	0	0	0	0.34249	0.32248	0	0	0	0	0	0
HERC2	0	0.036039	0	0	0	0	0	0	1	1	1	0.78275	0	0	0	0
HIP1R	0	0	0	0	0	0	0	0	0	0	0	0	0	0	0.051188	0
HKDC1	0	0	0	0	0	0	0	0	1	1	1	0	0	0	0	0
HMGCL	0	0	0.44368	0.052065	0	0	0.5735	0.1066	1	1	1	1	0	0	0.5746	0.066138
HMGN5	0.27381	0	0.25358	0.33419	0.48555	0	0.44424	0.54791	0	0	0	0	1	0	1	1
HMOX2	0	0	0	0	0	0	0	0	0	0	0	0	0	0	0	0
HNRL1	0	0	0	0	0	0.11577	0	0	1	1	0.089014	0.095558	0	0.078473	0	0
HNRPC	0	0.11198	0	0	0	0	0	0	1	1	0.94963	1	0	0	0	0
HNRPK	0	0	0	0	0	0	0	0	1	1	0.69594	0.11753	0.46057	0.5378	0.043666	0
HNRPL	0	0	0	0	0	0	0	0	1	1	0.31148	0.16487	0	0.2904	0	0
HNRPM	0	0	0	0	0	0	0	0	0.92483	1	0	0	0	0.023112	0	0
HNRPQ	0	0	0	0	0	0	0	0	0.48455	0.062008	0	0	0	0	0	0
HNRPR	0	0	0	0	0	0	0	0	1	1	0.066332	0.29997	0.095933	0	0	0
HNRPU	0	0	0	0	0	0	0	0	0.18978	0	0	0	0	0	0	0
HOME1	0	0	0	0	0	0	0	0	1	1	0.53695	0.28424	0	0.096648	0	0
HOME3	0	0	0	0	0	0	0	0	1	1	0.59693	0.50587	0	0.14183	0	0
HORN	0.044971	0.28721	0	0.090644	0	0.1224	0	0	0	0.052859	0	0	0	0.087727	0	0
HP1B3	0.10145	0.1053	0.12287	0	0	0	0	0	0.49711	0.50962	0.48282	0	0.021608	0.026677	0.056463	0
HPCA	0	0	0	0	0	0.0058744	0.037853	0	1	1	1	1	0	0	0	0
HPCL4	0	0	0	0	0	0	0	0	1	1	1	1	0	0	0	0
HPLN4	0	0	0	0	0	0	0	0	1	1	0.86011	0.12376	0	0	0	0
HS12A	0	0.072844	0	0	0	0	0	0	1	1	0	0	0	0.026743	0	0
HS74L	0	0	0	0	0.094537	0.11119	0.023472	0	0	0	0	0	0.095557	0.11378	0.018301	0
HS90A	0.018686	0	0	0	0.011574	0	0	0	0	0	0	0	0	0	0	0
HS90B	0.079422	0.047374	0	0	0	0	0	0	0	0	0	0	0	0	0	0
HSDL2	0	0	0	0	0	0	0	0	0	0	0	0	0	0	0	0
HSP72	0	0	0	0	0	0	0	0	1	1	0	0	0	0	0	0
HSP7C	0	0.15617	0	0	0	0	0	0	1	1	0	0	0	0	0	0
HTRA1	0	0	0	0	0	0	0	0	1	1	1	0.24763	0	0	0.010449	0
HXK1	0.060265	0	0	0	0	0	0	0	1	1	0	0	0	0	0	0
HYEP	0	0	0	0	0	0	0	0	0	0	0.21765	0	0	0	0	0
HYOU1	0	0	0	0	0	0	0	0	0	0	0	0	0	0	0	0
ICT1	0	0	0	0	0	0	0	0	1	1	1	1	0	0	0	0
IDH3A	0.32842	0	0	0	0.23635	0	0	0	1	1	0	0.076297	0	0	0	0
IDH3B	0	0	0	0	0	0	0	0	1	1	0.048892	0	0	0	0	0
IDHG1	0	0	0	0	0	0	0	0	1	1	0.39369	0	0	0	0	0
IDHP	0	0	0	0	0	0	0	0	1	1	0	0	0	0	0	0
IF2A	0	0	0	0	0	0	0	0	0.28997	0.39503	0	0.37074	0	0	0	0
IF4A3	0	0	0	0	0	0	0	0	1	1	0.94204	0.57847	0	0	0	0
IF4B	0.75792	0.74963	0.69361	0.61608	0.41849	0.40825	0.36893	0.2643	0	0	0	0	0	0	0	0
IF4G1	0	0	0	0	0	0	0	0	0.83941	0.95098	0	0	0	0	0	0
IF4G3	0.023621	0	0	0	0	0	0	0	0	0	0	0	0	0	0	0
IGEB	0	0	0	0	0	0	0	0	1	1	1	0	0	0	0	0
IKKB	0	0	0	0	0	0	0	0	0.40968	0.036302	0.01522	0	0.16358	0.00352	0	0
ILF2	0	0	0	0	0	0	0	0	1	1	0	0.025711	0.094443	0	0	0
ILF3	0	0	0	0	0	0	0	0	0.099219	0.13928	0	0	0	0	0	0
ILK	0	0	0	0	0	0	0	0	1	1	0	0	0	0	0	0
ILVBL	0	0	0	0	0	0	0	0	0	0	0	0	0	0	0	0
IQEC1	0	0.02296	0	0	0	0	0	0	0.53525	1	0	0	0	0.026839	0	0
IQEC2	0	0	0	0	0	0	0	0	0.70836	1	0.054569	0.29235	0	0.0047819	0	0
IQEC3	0	0	0	0	0	0	0	0	1	1	0.018016	0	0	0	0	0
IST1	0	0	0	0	0	0	0	0	1	1	1	0.32839	0	0	0	0
ITIH3	0.42839	0	0	0.49808	0.51658	0	0	0.59617	0	0	0	0	0.6754	0.08628	0	0.75365
ITM2B	0	0	0	0	0	0	0	0	1	1	0.42096	0	0	0	0	0
ITPR1	0	0.006037	0	0	0	0	0	0	0	0.045812	0	0	0	0	0	0
ITPR2	0	0	0	0	0	0	0	0	0	0	0	0	0.00354	0	0.061287	0
ITSN1	0	0	0	0	0	0	0	0	0.099494	0.28569	0	0	0.0051477	0.084849	0	0
ITSN2	0	1	0	0	0	0	0	0	1	1	0.78895	0.18188	0	0	0	0
JCAD	0	0.1109	0	0	0	0	0	0	0.6403	1	0.16929	0	0	0	0	0
JIP1	0	0	0	0	0	0	0	0	0.091391	0.54603	0.10051	0	0	0	0	0
JIP3	0.020284	0.014618	0	0	0	0	0	0	0.31753	0.30037	0	0	0.15142	0.14397	0	0
JKIP1	0	0	0	0	0	0	0	0	0.37632	0.32947	0	0	0	0	0	0
JKIP2	0	0	0	0	0	0	0	0	0.92903	1	0	0	0	0.087564	0	0
JKIP3	0	0	0	0	0	0	0	0	0.22724	0.3573	0	0	0.047745	0.10333	0	0
JPH3	0	0.067229	0	0	0	0	0	0	0.85421	1	0	0	0	0	0	0
JPH4	0	0	0	0	0	0	0	0	0	0	0	0	0.32299	0.31054	0	0
K1107	0	0	0	0	0	0	0	0	0.10443	0.22474	0	0	0	0	0	0
K1109	0	0	0	0	0	0	0	0	1	1	0.5958	0.14993	0	0	0	0
K121L	0	0	0	0	0	0	0	0	0	0	0	0	0	0	0	0
KAD5	0	0	0	0	0	0	0	0	0	0	0	0	0.057664	0.26091	0	0
KALRN	0	0	0	0	0	0	0	0	0.77825	1	0.68747	0.098022	0	0	0	0
KAP0	0	0	0	0	0	0	0	0	1	0.8754	0.76182	0	0.37273	0.026094	0.046667	0
KAP1	0	0	0	0	0	0	0	0	1	1	1	1	0	0	0.0076029	0.022479
KAP2	0	0	0.10213	0	0	0	0.1343	0	1	1	1	1	0	0	0.14122	0
KAP3	0	0.043381	0	0.29821	0	0	0	0	1	1	1	1	0	0	0	0
KAPCA	0	0	0.30624	0.2061	0	0	0.32602	0.20615	1	1	1	1	0	0	0.25825	0.12514
KAPCB	0	0	0	0	0	0	0	0	1	1	1	1	0	0	0.50282	0.16604
KBTBB	0	0	0	0	0	0	0	0	0	0	0	0	0	0	0	0
KCAB2	0	0	0	0	0.11222	0.15287	0.12755	0	1	1	1	0	0	0	0	0
KCC2A	0	0.25004	0	0	0	0	0	0	0	1	0	0.089077	0	0	0	0
KCC2B	0	0.1131	0	0	0	0	0	0	0	1	0	0	0	0.1053	0	0
KCC2D	0	0.16846	0	0	0	0.013219	0	0	0.48878	1	0	0.14888	0	0.23028	0	0
KCC2G	0	0.042359	0	0	0	0	0	0	0	1	0	0.024601	0	0	0	0
KCD12	0	0	0	0	0	0	0	0	1	1	0	0	0	0	0	0
KCD16	0	0	0	0	0	0	0	0	1	1	0.086864	0.13825	0	0	0	0
KCMA1	0	0	0	0	0	0	0	0	0	0	0	0	0	0	0	0
KCNB1	0	0	0	0	0	0	0	0	0	0	0	0	0	0	0	0
KCNQ2	0.0040746	0.0011719	0	0	0	0	0	0	0.11548	0.10661	0	0	0	0	0	0
KCRB	0.18626	0	0	0.04675	0.25021	0	0	0.079155	0.73379	0	0	0.27196	0	0	0	0
KCRU	0.40301	0.23913	0	0	0.21234	0.013219	0	0	1	0.65378	0	0	0	0	0	0
KDIS	0.091507	0.078637	0	0	0	0	0	0	0	0	0	0	0.07018	0.053065	0	0
KEAP1	0	0	0	0	0	0	0	0	1	1	0	0	0	0	0	0
KHDR1	0.10208	0.050412	0	0	0	0	0	0	1	0.86665	0	0	0.084553	0.015895	0	0
KHDR3	0	0	0	0	0	0	0	0	1	1	0.59401	1	0	0	0	0
KIF1A	0	0	0	0	0	0	0	0	0.24658	0.21771	0	0	0	0	0	0
KIF2A	0	0	0	0	0	0	0	0	0.51206	0.93081	0	0	0	0.038439	0	0
KIF3A	0	0	0	0	0	0	0	0	1	1	0	0	0	0	0	0
KIF3B	0	0	0	0	0	0	0	0	0.79401	0.72562	0	0	0	0	0	0
KIF3C	0	0	0	0	0	0	0	0	0.26693	0.67935	0	0	0	0	0	0
KIF5C	0	0	0	0	0	0.0049032	0	0	0.73188	1	0	0	0	0.020736	0	0
KIFA3	0	0	0	0	0	0	0	0	1	1	0.12841	0	0	0	0	0
KIFC3	0	0	0	0	0	0	0	0	0	0.083717	0	0	0	0	0	0
KINH	0	0	0	0	0	0	0	0	0.98064	0.95553	0	0	0	0	0	0
KLC1	0	0	0	0	0	0	0	0	0	0	0	0	0	0	0	0
KLC2	0.075819	0.10959	0	0	0.090897	0.13191	0	0	0.55108	0.65652	0	0	0	0	0	0
KMT2C	0	0	0	0.030339	0	0	0	0.02241	0	0	0	0.049277	1	1	1	1
KNDC1	0	0	0	0	0	0	0	0	0	0	0	0	0	0	0	0
KPBB	0	0	0	0	0	0	0	0	0	0	0	0	0	0	0	0
KPCB	0	0	0	0	0	0	0	0	1	1	0	0.067595	0	0.14849	0	0
KPCE	0	0	0.15487	0	0	0	0.18207	0	0	0	0.46008	0	0	0	0.16568	0
KPCG	0	0.032268	0	0	0	0	0	0	1	1	0	0.18468	0	0	0	0
KPYM	0	0	0	0	0	0	0	0	1	1	0.51174	0	0	0	0	0
KSR1	0	0	0	0	0	0	0	0	1	1	0.11638	0.041944	0	0	0	0
KSR2	0	0	0.44754	0	0	0	0.55619	0	0	0	1	0	0	0	0.5263	0
KTN1	0	0.0068034	0	0	0	0.004775	0	0	1	1	0.35533	0	0	0	0	0
L2GL1	0	0	0	0	0	0	0	0	0	0	0	0	0	0	0	0
LA	0	0	0	0	0	0	0	0	1	1	1	1	0	0	0	0
LACTB	0	0	0	0	0	0	0	0	1	1	0.026083	0	0	0	0	0
LANC2	0	0	0	0	0	0	0	0	0.7856	1	0	0	0	0	0	0
LARP1	0	0	0	0	0	0	0	0	1	1	0	0	0.11325	0.08631	0	0
LASP1	0	0	0	0	0	0	0	0	0.85872	1	0	0	0	0	0	0
LCLT1	0	0	0	0	0	0	0	0	0	0	0	0	0	0	0	0
LDHA	0.19117	0.12885	0	0	0	0	0	0	1	0.85333	0	0	0	0	0	0
LDHB	0	0	0	0	0	0	0	0	1	1	0	0	0	0	0	0
LERL1	0	0	0	0	0	0	0	0	1	1	1	1	0	0	0	0
LGAT1	0	0	0	0	0	0	0	0	0	0	0	0	0	0	0	0
LGI1	0	0	0	0	0	0	0	0	1	1	0	0	0	0	0	0
LGI3	0	0	0	0	0	0	0	0	1	1	0.30644	0.63708	0	0	0	0
LIN7A	0.24665	0	0	0	0.072799	0	0	0	1	0.38785	0	0.11543	0	0	0	0
LIN7C	0	0	0	0	0	0	0	0	0.76791	1	1	1	0	0	0	0
LIPA2	0	0	0	0	0	0	0	0	0.58052	1	0	0	0	0.08825	0	0
LIPA3	0	0	0	0	0	0	0	0	1	1	0.036694	0.42553	0	0	0	0
LIPA4	0	0	0	0	0	0	0	0	0	0.45931	0	0	0	0	0	0
LIS1	0	0	0	0	0	0	0	0	0	0	0	0	0	0	0	0
LNEBL	0	0	0	0	0	0	0	0	1	1	0	0	0	0	0	0
LNP	0	0	0	0	0	0	0	0	0	0	0	0	0	0	0	0
LONM	0.14175	0.121	0	0	0	0	0	0	1	1	0	0	0	0	0	0
LONP2	0	0	0	0	0	0	0	0	0	0	0	0	0	0	0	0
LPPRC	0	0	0	0	0	0	0	0	0.00089464	0.058286	0	0	0	0	0	0
LRC49	0	0	0	0	0	0	0	0	1	1	0	0	0	0	0	0
LRC59	0	0	0	0	0	0	0	0	1	1	0	0	0	0	0	0
LRFN4	0	0	0	0	0	0	0	0	0	0	0	0	0	0	0	0
LRRC7	0	0	0	0	0	0	0	0	0.74737	1	0.31435	0.23796	0	0	0	0
LUC7L	0	0	0	0	0	0	0	0	0.26247	1	0	0	0	0	0	0
LUZP1	0	0	0	0	0	0	0	0	1	1	0	0	0	0	0	0
LYPL1	0	0	0	0	0	0	0	0	1	1	1	1	0	0	0	0
LYRIC	0	0.060059	0	0	0	0	0	0	1	1	0	0	0	0	0	0
LYSC	0	0	0.16728	0.69823	0	0	0.16673	0.80587	0	0	0	1	0	0	0.11451	0.80862
LZTS1	0	0	0	0	0	0	0	0	1	1	0.0013491	0.1586	0	0	0	0
LZTS2	0	0	0	0	0	0	0	0	1	1	0.16213	0.64375	0	0	0	0
LZTS3	0	0	0	0	0	0	0	0	1	1	0	0.11197	0	0.059655	0	0
M21D2	0	0	0	0	0	0	0	0	0	0	0	0	0	0	0	0
M2OM	0	0	0	0	0	0	0	0	0.80705	0.77778	0	0	0	0	0	0
M3K5	0	0	0	0	0	0.010454	0	0	0.86458	1	1	0.79688	0	0.090597	0	0
M4K4	0	0	0	0	0	0	0	0	0	0	0	0	0.043541	0	0	0
MA6D1	0.013584	0.093138	0	0	0	0	0	0	1	1	1	0	0	0	0	0
MA7D1	0	0	0	0	0	0	0	0	1	1	0.079205	0	0	0.079432	0	0
MACF1	0	0	0	0	0	0	0	0	0	1	0	0	0	0	0	0
MADD	0	0	0	0	0	0	0	0	0	0	0	0	0	0	0	0
MAG	0	0	0	0	0.10132	0	0	0	1	0.65824	0	0	0.72064	0.52111	0	0.010754
MAGD1	0	0	0	0	0	0	0	0	0.1104	0.20341	0	0	0	0	0	0
MAIP1	0	0	0.61367	0.36527	0.02798	0.01421	0.76743	0.47376	1	1	1	1	0.058881	0.043834	0.8591	0.54273
MAP1A	0	0.085001	0	0	0	0	0	0	0.98897	1	0.27095	0.39379	0	0.14906	0	0
MAP1B	0	0.032246	0	0	0	0	0	0	1	1	1	1	0	0	0	0
MAP1S	0	0	0	0	0	0	0	0	0.064345	0.80958	0	0	0	0	0	0
MAP4	0	0	0	0	0	0	0	0	0.9559	0.96158	0	0	0	0	0	0
MAP6	0	0.098875	0	0	0	0	0	0	1	1	0	0	0	0.020788	0	0
MAP7	0.079161	0	0	0	0.017701	0	0	0	0.31039	0	0	0	0.67009	0.11637	0	0
MARK1	0	0	0	0	0	0	0	0	0.85338	0.95582	0	0	0.33312	0.37668	0	0
MARK2	0	0	0	0	0	0	0	0	1	0.92066	0	0	0	0	0	0
MARK3	0.070057	0.22987	0	0	0	0	0	0	0.85546	1	0	0	0	0	0	0
MARK4	0	0	0	0	0	0	0	0	1	1	0.93237	0.85314	0	0	0	0
MAST1	0	0.0186	0	0	0	0	0	0	0	0.19614	0	0	0	0	0	0
MAST3	0	0	0	0	0	0.0019694	0	0	1	1	0	0	0	0.016611	0	0
MAST4	0	0	0	0	0	0	0	0	0	0	0	0	0	0	0	0
MATK	0	0	0.31899	0	0	0	0.39205	0	0	0	0.87521	0	0	0	0.47852	0
MATR3	0	0	0	0	0	0	0	0	1	1	0.6871	0.96476	0	0	0	0
MBB1A	0	0	0	0	0	0	0	0	0.67306	0.77614	1	0	0	0	0	0
MBLC2	0	0	0	0	0	0	0	0	0	0	0	0	0	0	0	0
MBNL2	0	0	0	0	0	0	0	0	1	1	0.075425	0	0	0	0	0
MBOA7	0	0	0.19953	0	0	0	0.27662	0	0	0	0.47862	0	0	0	0.31806	0
MBP	0	0	0	0	0	0	0	0	1	1	1	0.66562	0	0	0	0
MCCA	0	0	0	0	0	0	0	0	1	1	0	0	0	0	0	0
MCCB	0	0.17832	0	0	0	0	0	0	1	1	0	0.28311	0	0	0	0
MCTP1	0	0	0	0	0	0	0	0	0.32391	0.020038	0	0	0	0	0	0
MDHM	0.23517	0	0	0.1444	0.23063	0	0	0.12159	0.98503	0.026154	0	0.63899	0	0	0	0
MECP2	0	0	0	0	0	0	0	0	0.42029	0.48376	0.2983	0	0	0	0	0
MEP50	0	0	0	0	0	0	0	0	0.072844	0	0	0	0	0	0	0
MEST	0	0	0	0	0	0	0	0	1	1	0	0	0	0	0	0
MFR1L	0	0	0	0	0	0	0	0	0	0	0	0	0	0	0	0
MGN	0	0	0	0	0	0	0	0	1	1	1	1	0	0	0	0
MIB1	0	0	0	0	0	0	0	0	0.93469	0.95924	0	0	0	0	0	0
MIB2	0	0	0	0	0	0	0	0	0	0	0	0	0	0	0	0
MIC19	0	0	0	0	0	0	0	0	0	0	0	0	0	0	0	0
MIC60	0	0	0	0	0.13812	0.1092	0	0	0	0	0	0	0.14862	0.11698	0	0
MINK1	0	0.13536	0	0	0	0	0	0	0.96571	1	0	0	0	0	0	0
MIO	0	0	0	0	0	0	0	0	0	0	0	0	0	0	0	0
MIRO1	0	0	0	0	0	0	0	0	0.21232	0.21325	0	0	0	0	0	0
MLEC	0	0	0	0	0	0	0	0	0	0	0	0	0	0	0	0
MLF2	0	0	0	0	0	0	0	0	1	1	0	0	0	0	0	0
MLH1	0	0	0	0	0	0	0	0	1	1	1	1	0	0	0	0
MLP3A	0	0	0	0	0	0	0	0	1	1	1	0	0	0	0	0
MMGT1	0	0	0	0	0	0	0	0	1	1	0.84676	0	0	0	0	0
MMSA	0	0	0	0	0	0.18076	0	0	1	1	1	0.29921	0	0	0	0
MOBP	0	0	0	0	0	0	0	0	1	1	0.35819	0	0	0	0	0
MOG	0	0	0.068224	0	0	0	0	0	1	0.85278	1	0.075536	0	0	0	0
MOGS	0	0	0	0	0	0	0	0	0.93481	0.27672	0	0	0.20995	0	0	0
MP2K4	0	0	0	0	0	0	0	0	1	1	1	0	0	0	0	0
MP2K7	0	0	0	0	0	0	0	0	1	1	0.25969	0	0	0	0	0
MPCP	0	0.030957	0	0	0	0	0	0	1	1	0	0	0	0.034204	0	0
MPP2	0	0	0	0	0	0	0	0	0.081705	0	0	0	0.33518	0	0	0
MPRIP	0	0	0	0	0	0	0	0	0.58614	1	1	0.77205	0	0	0	0
MRCKA	0.018519	0.085818	0	0	0	0	0	0	0	0.1383	0	0	0	0	0	0
MRCKB	0	0	0	0	0	0	0	0	0	0	0	0	0.052008	0.10477	0	0
MRO2B	0.32827	0.31707	0.15977	0	0.41017	0.39662	0.20187	0	0.13726	0.10224	0	0	0	0	0	0
MSI2H	0	0	0	0	0	0	0	0	1	1	1	1	0	0	0	0
MTAP2	0	0.038716	0	0	0	0	0	0	1	1	0.0019253	0	0	0.027075	0	0
MTCL1	0	0.0036266	0	0	0	0.00068793	0	0	1	1	0.96019	0.65192	0	0	0	0
MTMR1	0	0	0	0	0	0	0	0	0.12172	0.080391	0	0	0.061507	0.043767	0	0
MTMR5	0	0	0	0	0	0	0	0	0.46616	1	0	0	0.0023378	0.31561	0	0
MTUS1	0.58402	0.61511	0.55525	0.49669	0.28195	0.31954	0.27191	0.19156	0	0	0	0	0.0062392	0.047206	0.019519	0
MTUS2	0	0	0	0	0	0	0	0	0	0.14683	0	0	0	0	0	0
MUC19	0.1961	0	0	0.8597	0.018058	0	0	0.82558	0	0	0	0.97761	0.04714	0	0	0.92507
MY18A	0	0	0	0	0	0	0	0	0.038194	1	0.19619	0	0	0.025459	0	0
MYCB2	0	0.036961	0	0	0	0.073231	0	0	1	1	0.53594	0.11261	0	0.092995	0	0
MYEF2	0	0	0	0	0	0	0	0	1	1	0	0	0	0	0	0
MYH10	0	0.022615	0	0	0	0	0	0	0	1	0.36103	0.43793	0	0	0	0
MYH14	0	0.019933	0	0	0	0.01189	0	0	0	1	0.53931	0.17875	0	0.0022064	0	0
MYH9	0	0.054739	0	0	0	0.11125	0	0	0	1	0.79951	0.40864	0	0.0011881	0	0
MYL6	0	0.22908	0	0	0	0	0	0	0.39349	1	1	0.3092	0	0	0	0
MYO1B	0	0	0	0	0	0	0	0	0.20014	0.16104	0	0	0.054663	0.03782	0	0
MYO1D	0	0	0	0	0	0	0	0	1	1	0.54952	0	0	0	0	0
MYO5A	0	0.14761	0	0	0	0.043711	0	0	0.86966	1	0.55188	0.14707	0	0.10471	0	0
MYO6	0	0	0	0	0	0	0	0	0.68899	1	0.57872	0	0	0	0	0
MYO9A	0.51598	0.065413	0	0	0.53393	0	0	0	0	0	0	0	0.75874	0.16021	0	0
MYORG	0	0	0	0	0	0	0	0	0.079674	0.23838	0.17297	0	0	0	0	0
MYPR	0	0	0	0	0	0	0	0	1	0.64351	1	0	0	0	0	0
MZT2	0.0039192	0	0	0	0.027057	0	0	0	1	1	1	0	0	0	0	0
N6MT1	0	0	1	1	0	0	1	1	0	0	1	1	0	0	0	0
NAC2	0.10959	0	0	0	0	0	0	0	0.8635	0.4043	0	0	0	0	0	0
NAV1	0	0.027969	0	0	0	0	0	0	0	1	0	0	0	0	0	0
NB5R3	0	0	0	0	0	0	0	0	0	0	0	0	0	0	0	0
NCAM1	0.098607	0.48059	0.53453	0.55973	0	0.0063465	0.10944	0.12499	0	0	0.078812	0.11318	0	0	0.033002	0
NCDN	0	0	0	0	0	0	0	0	0	0	0	0	0	0	0	0
NCEH1	0	0	0	0	0	0	0	0	0	0	0	0	0	0	0	0
NCKP1	0	0	0	0	0	0	0	0	1	1	0	0	0.021822	0.046483	0	0
NCLN	0.024315	0	0	0	0.040626	0	0	0	1	1	0	0	0	0	0	0
NCOA5	0	0	0	0.12195	0	0	0	0	0.60677	0.061836	0	1	0.33953	0.10596	0	0.55715
NCPR	0	0	0	0	0	0	0	0	0.37091	0.26779	0.072249	0	0	0	0	0
NDEL1	0	0	0	0	0	0	0	0	1	1	0	0.04021	0	0	0	0
NDUA4	0	0	0	0	0.049989	0.24376	0	0	0	0	0	0	0	0	0	0
NDUS1	0	0	0	0	0	0	0	0	0	0	0	0	0	0	0	0
NDUS2	0	0	0	0	0	0	0	0	1	1	0	0	0	0	0	0
NEB1	0	0	0	0	0	0	0	0	1	1	0.1731	0	0	0	0	0
NEB2	0	0	0	0	0	0	0	0	0	0.38523	0	0	0	0	0	0
NEMO	0	0	0	0	0	0	0	0	0	0	0	0	0	0	0	0
NEUL4	0	0	0	0	0	0	0	0	1	1	0.44181	0.6012	0	0	0	0
NF1	0	0	0	0	0	0	0	0	0.52995	1	0	0	0	0.06761	0	0
NFASC	0	0.096153	0	0	0	0	0	0	0	0	0	0	0	0	0	0
NFH	0	0.54355	0.0035305	0	0	0	0	0	0.028525	1	0.42058	0.057386	0	0	0	0
NFL	0	0.71396	0.0010716	0	0	0	0	0	0.26418	1	0.23889	0.050464	0	0	0	0
NFM	0	0.69463	0	0	0	0.0018547	0	0	0.088896	1	0.38245	0.21162	0	0	0	0
NFS1	0	0	0	0	0	0	0	0	1	1	0	0	0	0	0	0
NGAP	0	0.0045986	0	0	0	0	0	0	0.76056	1	0.13439	0.16232	0	0	0	0
NH2L1	0	0	0	0	0	0	0	0	1	1	1	1	0	0	0	0
NHP2	0.16734	0	0.2053	0.36303	0	0	0	0	1	0	1	1	0	0	0	0
NHSL2	0.4799	0.48604	0.0094113	0.087598	0.3508	0.35819	0	0	1	1	0	0	0.20895	0.21695	0	0
NICN1	0	0	0.066304	0	0	0	0.1181	0	0.75829	0.66982	0.81095	0.7063	0	0	0.076385	0
NIPS1	0	0	0	0	0	0	0	0	1	0.51222	0	0	0	0	0	0
NIPS2	0.32531	0	0	0	0	0	0	0	1	0.76138	0	0	0	0	0	0
NLGN2	0	0	0	0	0.065728	0.052701	0	0	1	1	0	0.18404	0.11731	0.10308	0	0
NMDE1	0	0	0	0	0	0	0	0	1	1	0.39809	0	0	0	0	0
NMDE2	0	0.038816	0	0	0	0	0	0	1	1	0.84354	0.18973	0	0.025872	0	0
NMDZ1	0	0.042809	0	0	0	0	0	0	1	1	0.62653	0.17832	0	0	0	0
NOMO1	0.00054402	0.049301	0	0	0	0	0	0	1	1	0.27944	0	0	0.025872	0	0
NONO	0	0	0	0.13109	0	0	0	0.044505	0	0	0	0.063426	0.98582	0.72395	0.36889	1
NOS1	0	0	0	0	0	0	0	0	0.38051	1	0	0	0	0	0	0
NPTN	0.29037	0.13714	0	0	0.076371	0	0	0	0.22858	0	0	0	0	0	0	0
NRX1A	0	0	0	0	0	0	0	0	0	0	0	0	0	0	0	0
NRX2A	0	0	0	0	0	0	0	0	0.47529	0.64792	0.39469	0	0	0	0	0
NSF	0	0.044581	0	0	0	0	0	0	1	1	0.28143	0	0	0	0	0
NUBPL	0.030549	0.07847	0	0	0	0	0	0	1	1	0	0.47036	0	0	0	0
NUCL	0.0082769	0	0	0	0.032247	0	0	0	0.14356	0.05503	0	0	0.086006	0.048055	0.0044877	0
NUFP2	0	0	0	0	0	0	0	0	0	0	0	0	0	0	0	0
NUMBL	0.019985	0.0011496	0	0	0	0	0	0	1	1	0	0	0.1785	0.15357	0	0
NWD2	0	0	0	0	0	0	0	0	1	1	0	0	0	0	0	0
NYAP1	0	0	0	0	0	0	0	0	0.13731	0.10224	0	0	0	0	0	0
NYAP2	0	0	0	0	0	0	0	0	0	0	0	0	0	0	0	0
OCAD1	0	0	0	0	0	0	0	0	1	1	0.92947	1	0	0	0	0
ODB2	0	0	0	0	0	0	0	0	1	1	1	1	0	0	0	0
ODBA	0	0	0	0	0	0	0	0	1	1	0.78352	1	0	0	0	0
ODO1	0	0	0	0	0	0	0	0	1	1	1	1	0.02416	0.047295	0	0
ODO2	0	0.025425	0	0	0	0	0	0	1	1	1	1	0	0	0	0
ODP2	0	0	0	0	0	0	0	0	1	1	1	1	0	0	0	0
ODPA	0	0	0	0	0	0	0	0	1	1	1	1	0	0	0	0
ODPB	0	0.15305	0	0	0	0	0	0	1	1	1	1	0	0	0	0
ODPX	0	0	0	0	0	0	0	0	1	1	1	1	0	0	0	0
OFUT2	0	0	0	0	0	0	0	0	0	0	0	0	0	0	0	0
OGDHL	0	0	0	0	0	0	0	0	1	1	1	1	0	0	0	0
OGT1	0	0	0	0	0	0	0	0	1	1	0	0	0	0	0	0
OPA1	0	0	0	0	0	0	0	0	0	0.0074602	0	0	0	0	0	0
OSBL8	0	0	0	0	0	0	0	0	0.25976	0.37687	0	0	0	0	0	0
OSBP1	0.28174	0.0011552	0.2786	0	0.38062	0.039927	0.36886	0	0	0	0	0	0.3918	0.019039	0.37806	0
OSBP2	0	0	0	0	0	0	0	0	0	0	0	0	0	0	0	0
OST48	0	0	0	0	0	0	0	0	1	1	0	0	0.006276	0.0028632	0	0
OXDA	0	0	0	0	0	0	0	0	0.098135	0.72661	0	0.14754	0	0	0	0
P5CR2	0.089858	0.25465	0	0	0	0	0	0	1	1	0	0	0	0	0	0
P5CS	0	0	0	0	0	0	0	0	0.1504	0.19412	0	0	0	0	0	0
PABP1	0	0	0	0	0	0	0	0	1	1	0.0057479	0	0	0.32955	0	0
PABP4	0	0	0	0	0	0	0	0	1	1	0	0.035691	0	0	0	0
PACS1	0	0	0	0	0	0	0	0	0.26923	1	0	0	0	0	0	0
PAIRB	0.068175	0	0	0	0	0	0	0	0	0	0	0	0.08681	0	0	0
PANK4	0	0	0	0	0	0	0	0	0	0	0	0	0	0	0	0
PANX2	0	0	0	0	0	0	0	0	0	0	0	0	0	0	0	0
PARK7	0	0	0	0	0	0	0	0	1	1	1	1	0	0	0	0
PCAT2	0	0	0	0	0	0	0	0	0.22452	0.12505	1	0	0	0	0	0
PCBP1	0	0	0	0	0	0	0	0	1	1	0.020082	0.21587	0	0	0	0
PCBP2	0	0.014701	0	0	0	0	0	0	1	1	0.44107	0.21031	0	0.0099991	0	0
PCDH1	0	0	0.0036185	0	0	0	0.032097	0	0	0	0	0	0	0	0.084796	0
PCLO	0	0.020321	0	0	0	0	0	0	0.91919	1	0	0	0	0	0	0
PCM1	0.26241	0.25273	0.26064	0.24475	0.033771	0	0	0.023666	1	1	1	1	0.082385	0	0	0.068798
PCNT	0	0	0	0	0	0	0	0	0.92542	1	1	1	0	0	0	0
PDE2A	0	0	0	0	0	0	0	0	1	1	0.44121	0.12527	0	0	0	0
PDE4B	0	0	0	0	0	0	0	0	1	1	0	0	0	0	0	0
PDIA1	0.016176	0	0	0	0	0	0	0	0.17125	0	0	0	0	0	0	0
PDK1	0	0	0	0	0	0	0	0	1	1	0.21686	0.4553	0	0	0	0
PDK3	0	0	0.066304	0.0081334	0	0	0.12202	0.053937	1	1	1	1	0	0	0.054862	0
PDLI5	0	0	0	0	0	0	0	0	1	1	0.094032	0	0	0	0	0
PDZ11	0	0	0	0	0	0	0.052644	0	1	1	1	1	0.052443	0.097881	0.15195	0.057025
PDZD8	0	0	0	0	0	0	0	0	0	0	0	0	0	0	0	0
PERI	0.12598	0.20576	0	0	0	0	0	0	1	1	0.45013	0.24296	0	0	0	0
PEX14	0	0	0	0	0	0	0	0	1	1	0.7944	0	0	0	0	0
PEX5R	0	0	0	0	0	0	0	0.0013144	0	0.26805	0	0.20625	0	0	0	0.021117
PEX6	0	0	0	0	0	0	0	0	1	1	0.52691	0.56303	0	0	0	0
PFKAL	0	0.06568	0	0	0	0	0	0	1	1	0.1117	0	0	0	0	0
PFKAM	0	0.024942	0	0	0	0	0	0	1	1	0.15512	0	0	0.018648	0	0
PFKAP	0	0	0	0	0	0	0	0	1	1	0.0052419	0	0	0	0	0
PGAM5	0	0	0	0	0	0	0	0	1	1	0	0	0	0	0	0
PGAP1	0	0	0	0	0	0	0	0	0.24093	0.19212	0	0	0	0	0	0
PGRC1	0.13602	0.12348	0	0	0.035759	0.020469	0	0	1	1	0.32503	0	0.09004	0	0	0
PGRC2	0	0	0	0	0	0	0	0	0	0	0	0	0	0	0	0
PHAR1	0	0.035656	0	0	0	0	0	0	1	1	0	0	0	0	0	0
PHB	0	0	0	0	0	0	0	0	1	1	0	1	0	0	0	0
PHB2	0	0	0	0	0	0	0	0	1	1	0	1	0	0	0	0
PHF24	0	0	0	0	0.3845	0.42944	0	0	1	1	0	0	0	0	0	0
PHF5A	0	0	0	0	0	0	0	0	1	1	1	1	0	0	0	0
PHLB1	0	0.079453	0	0	0	0.077493	0	0	1	1	0	0	0.19903	0.35828	0	0
PI4KA	0	0	0	0	0	0	0	0	1	1	0	0	0	0	0	0
PICAL	0	0	0	0	0	0	0	0	0	0	0	0	0	0	0	0
PIGS	0	0	0.067722	0	0	0	0.11831	0	0	0	0.024664	0	0	0	0.063212	0
PIGT	0	0	0	0	0	0	0	0	0.233	0.14336	0.58153	0	0	0	0	0
PIGU	0	0	0	0	0	0	0	0	0	0	0	0	0	0	0	0
PININ	0	0	0	0	0	0	0	0	0.90572	0.88448	0.98132	1	0	0	0	0
PIP	0	0	0.038318	0.40629	0.096856	0	0.15471	0.60171	0	0	0	0.71216	0	0	0	0.25573
PITM1	0	0	0	0	0	0	0	0	0	0	0	0	0	0	0	0
PITM2	0	0	0	0	0	0	0	0	0.44498	0.70249	0	0	0.02031	0.13034	0	0
PKHA5	0	0	0	0	0	0	0	0	1	1	0.27368	0.29589	0	0	0	0
PKHA6	0	0	0	0	0	0	0	0	0	0.066539	0	0	0	0	0	0
PKP4	0	0.0046819	0	0	0	0	0	0	1	1	0.58474	0.70633	0	0	0	0
PLAK	0.19875	0.12734	0	0.17845	0.31899	0.23234	0.050326	0.2887	0.76394	0.54322	0.073078	0.64058	0.34892	0.25413	0.054559	0.31434
PLCA	0	0	0.045483	0	0	0	0	0	0.20628	0	0.073724	0	0	0	0	0
PLCC	0	0	0	0	0	0	0	0	0	0	0	0	0	0	0	0
PLEC	0	0.071289	0	0	0	0	0	0	0	1	0	0.13814	0	0.013932	0	0
PLPL6	0	0	0	0	0	0	0	0	0	0.011009	0	0	0	0	0	0
PLPP3	0.027884	0.009386	0	0	0	0	0	0	0	0	0	0	0	0	0	0
PLPR3	0	0	0	0	0	0	0	0	0	0.18153	0	0	0	0	0	0
PLPR4	0.19172	0	0	0	0	0	0	0	1	0	0	0	0	0	0	0
PMGT2	0	0	0	0	0	0	0	0	0	0	0	0	0	0	0	0
PNKD	0	0	0	0	0	0	0	0	0.84038	0.80238	0.29554	0	0	0	0	0
PORCN	0	0	0.0021846	0	0	0	0.0092634	0	0	0	0.042329	0	0	0	0.071373	0
PP1A	0	0	0	0	0	0	0	0	1	1	0.15688	0	0.13798	0.33183	0	0
PP1B	0	0	0	0	0	0	0	0	1	1	0	0	0	0	0	0
PP1G	0	0	0	0	0	0	0	0	1	1	0	0	0	0	0	0
PP2BA	0	0.0010719	0	0	0	0.0046536	0	0	0.6667	1	0	0	0	0.32822	0	0
PPIB	0.022954	0	0	0	0	0	0	0	0	0	0	0	0	0	0	0
PR38B	0.58157	0.21835	0	0.59442	0.28556	0	0	0.31545	0	0	0	0	0	0	0	0
PRAF2	0	0	0	0	0	0	0	0	0	0.43455	1	0	0	0	0	0
PRAF3	0	0	0	0	0	0	0	0	0	0	0	0	0	0	0	0
PRC2A	0	0	0	0	0	0	0	0	0	0	0	0	0.19219	0	0.054243	0.14905
PRC2C	0	0	0	0	0	0	0	0	0.53959	0.30916	0.26281	0	0	0	0	0
PRDX1	0	0	0	0	0	0	0	0	1	1	0.85351	0.17744	0	0	0	0
PRDX2	0	0	0	0.13697	0	0	0	0.17019	1	1	1	1	0	0	0	0.12079
PRDX3	0.18276	0.079903	0	0	0	0	0	0	1	1	1	1	0	0	0	0
PRDX4	0.18625	0.31683	0.093419	0	0	0	0	0	0.5731	0.97874	0.25025	0	0	0	0	0
PRDX5	0.063018	0.078459	0	0	0	0	0	0	1	1	1	0.6457	0	0	0	0
PRDX6	0	0	0	0	0	0	0	0	1	1	0.94804	1	0	0	0	0
PREB	0	0	0	0	0	0	0	0	0.13602	0.096122	0	0	0	0	0	0
PRIC2	0	0	0	0	0	0	0	0	0.93822	1	0.029597	0.027583	0	0	0	0
PRIO	0	0	0	0	0	0	0	0	0.42786	0.58702	0	0	0	0.026883	0	0
PRKRA	0	0	0	0	0	0	0	0	1	1	0	0	0	0	0	0
PRP19	0	0	0	0	0	0	0	0	1	1	1	1	0	0	0	0
PRP6	0	0	0	0	0	0	0	0	0	0	0	0	0	0	0	0
PRP8	0.020912	0.18167	0.67733	0.26652	0	0	0	0	1	1	1	1	0	0.11221	0.76255	0.22718
PRPS1	0	0	0	0	0	0	0	0	0	0	0	0	0	0	0	0
PRRT1	0	0	0	0.056811	0	0	0	0.035977	0	0	0	0.022501	0	0	0	0
PRRT2	0	0	0	0	0	0	0	0	0.75924	0	0	0	0	0	0	0
PRS10	0	0	0	0	0	0	0	0	1	1	0.79974	0.26766	0	0	0	0
PRS4	0	0	0	0	0	0	0	0	0	0	0	0	0	0	0	0
PRS7	0	0	0	0	0	0	0	0	0.12289	0.12741	0	0	0	0	0	0
PRS8	0	0	0	0	0	0	0	0	1	1	0.12664	0	0	0	0	0
PSD1	0	0	0	0	0	0	0	0	1	1	0.080147	0.058588	0	0	0	0
PSD11	0	0	0	0	0	0	0	0	0.85758	0.81961	0.57476	0	0	0	0	0
PSD3	0.075103	0	0	0	0	0	0	0	0.9924	0.4548	0	0	0.026004	0	0	0
PSMD1	0	0	0	0	0	0	0	0	0.13046	0.36493	0	0	0	0.0094235	0	0
PSMD2	0	0	0	0	0	0	0	0	1	1	0	0	0	0	0	0
PSMD3	0	0	0	0	0	0	0	0	0.098135	0.14672	0	0	0	0	0	0
PSMD5	0	0	0	0	0	0	0	0	0	0	0	0	0	0	0	0
PSMD6	0	0	0	0	0	0	0	0	0	1	0	0	0	0	0	0
PSPC1	0	0	0	0	0	0	0	0	0	0	0	0	1	1	0.71902	1
PTCD3	0	0	0	0	0	0	0	0	1	1	0	0	0.053291	0.06516	0	0
PTN2	0	0	0	0	0	0	0	0	0.32136	0.26847	0.32594	0	0	0	0	0
PTPR2	0	0	0	0	0	0	0	0	1	1	1	0.49177	0	0	0	0
PTSS1	0	0	0	0	0	0	0	0	1	1	1	0	0	0	0	0
PUF60	0.18945	0.026003	0	0.66449	0	0	0	0.27315	0	0	0	0.32302	0	0	0	0.48852
PUM2	0	0	0	0	0	0	0	0	1	1	0.63382	0	0	0	0	0
PURA	0	0.0030935	0	0	0	0	0	0	1	1	0.74518	0	0	0.044181	0	0
PURB	0	0	0	0	0	0	0	0	1	1	0.32081	0	0	0	0	0
PURG	0	0	0	0	0	0	0	0	1	1	0.76529	0	0	0	0	0
PXL2B	0	0	0	0	0	0	0	0	1	1	1	0	0	0	0	0
PYC	0.0098868	0.25938	0	0	0	0.027942	0	0	1	1	0	0.16683	0	0	0	0
PYGB	0	0	0	0	0	0	0	0	0.20143	0	0	0	0	0	0	0
PYGM	0	0	0	0	0	0	0	0	0	0	0	0	0	0	0	0
PYR1	0	0	0	0	0	0	0	0	1	1	0.4432	0	0	0	0	0
QCR1	0	0	0	0	0	0	0	0	0	0	0	0	0	0	0	0
QCR2	0	0	0	0	0	0	0	0	1	1	0	0	0	0	0	0
RAB10	0	0	0	0	0	0	0	0	1	1	0.94887	0	0	0	0	0
RAB14	0.018375	0.0056205	0	0	0	0	0	0	1	1	0.60624	0	0	0	0	0
RAB15	0	0	0	0	0	0	0	0	1	1	1	1	0	0	0	0
RAB18	0	0	0	0	0	0	0	0	1	1	1	1	0	0	0	0
RAB1A	0.067959	0	0	0	0	0	0	0	0.54478	0	0.26423	0	0	0	0	0
RAB1B	0.27261	0.31777	0	0.055187	0	0	0	0	1	1	0	0.32757	0	0	0	0
RAB2A	0	0	0	0	0	0	0.05138	0	1	0.7421	1	0	0	0	0	0
RAB3A	0.22865	0	0	0	0	0	0	0	1	0.5063	0.27543	0	0	0	0	0
RAB3B	0.018963	0.0087528	0	0.25737	0.022696	0.010305	0	0.30951	1	1	1	1	0	0	0	0.11457
RAB3C	0	0	0	0	0	0	0	0	1	1	1	1	0	0	0	0
RAB5A	0	0	0	0	0	0	0	0	1	1	0.28399	0	0	0	0	0
RAB5C	0.15358	0.1679	0	0	0	0	0	0	1	1	0.65524	0	0	0	0	0
RAB7A	0.087105	0.28152	0	0	0	0	0	0	1	1	0.44857	0	0	0	0	0
RABL6	0	0	0	0	0	0	0	0.01821	0	0	0	0	0	0	0	0.055572
RAC1	0	0	0	0	0	0	0	0	1	1	0.11846	0	0	0	0	0
RACK1	0	0	0	0	0	0	0	0	0	0	0	0	0	0	0	0
RAE1L	0.075947	0	0	0	0.084622	0	0	0	1	1	0.42933	0	0.059803	0	0	0
RALY	0	0	0	0	0	0	0	0	1	1	0.76539	1	0	0	0	0
RALYL	0	0	0	0	0	0	0	0	1	1	1	0.71597	0	0	0	0
RAN	0	0	0.0034374	0	0	0	0.034575	0	1	1	1	1	0	0	0.098925	0
RAP2A	0.084562	0	0	0.0056673	0	0	0	0	1	1	0.9905	1	0	0	0	0
RASF5	0	0	0	0	0	0	0	0	0.91532	0.92085	0.6525	0.73201	0	0	0	0
RASK	0.079833	0	0	0	0	0	0	0	1	1	0.11929	0	0	0	0	0
RASM	0.021289	0.031496	0	0	0	0.025696	0	0	0.07644	0.1082	0	0	0	0.012634	0	0
RB11A	0	0	0	0	0	0	0	0	1	1	1	1	0	0	0	0
RB11B	0	0	0.24806	0.163	0	0	0.27001	0	1	1	1	1	0	0	0.21482	0
RB6I2	0	0	0	0	0	0	0	0	0.67721	1	0.53851	0.033805	0	0.13169	0	0
RBCC1	0	0	0	0	0	0	0	0	1	1	1	0.82282	0	0	0	0
RBM25	0.049906	0.58411	0	0.53698	0.85293	1	0.71324	1	0	0.10677	0	0	1	1	0.84979	1
RBM39	0.2329	0.12304	0	0.52251	0.06502	0	0	0.42183	0.17273	0	0	1	0.25992	0.11395	0	0.63817
RBM8A	0	0	0	0	0	0	0	0	1	1	1	1	0	0	0	0
RBMX	0	0.13729	0	0	0	0	0	0	1	1	0	1	0	0	0	0
RCN2	0	0	0	0	0.011291	0	0	0	1	1	0	0	0.034507	0	0	0
RDH11	0	0	0	0	0	0	0	0	0	0	0	0	0	0	0	0
REEP2	0	0	0	0	0	0	0	0	1	0.93496	1	0	0	0	0	0
REEP5	0.039336	0	0	0	0.0082573	0	0	0	1	0.68791	0.86663	0	0	0	0	0
RENR	0	0	0	0	0	0	0	0	1	1	1	1	0	0	0	0
RENT1	0	0.0073644	0	0	0	0	0	0	1	1	0.89782	0.23495	0	0.12183	0	0
RETR2	0	0	0	0	0	0	0	0	0	0	0	0	0	0	0	0
RFIP2	0	0	0	0	0	0.10081	0	0	1	1	0	0.40467	0.37803	0.58771	0	0.024427
RFIP3	0	0	0	0	0	0	0	0	0	0	0	0	0	0	0	0
RFIP5	0	0.0037766	0	0	0.022372	0.063404	0	0	1	1	1	1	0.13586	0.18083	0	0
RGPA1	0	0	0	0	0	0	0	0	0.31909	0.25894	0.17187	0	0	0	0	0
RGRF1	0	0	0.0022467	0	0.020101	0	0.036031	0	0	0	0.022078	0	0.06217	0.050615	0.075773	0
RGRF2	0	0	0	0	0	0	0	0	0.98323	1	0	0	0	0	0	0
RGS9	0	0	0	0	0	0	0	0	0	0	0	0	0	0	0	0
RHBT2	0	0	0	0	0	0	0	0	1	1	0.73107	0.56495	0	0	0	0
RHEB	0	0	0	0	0	0	0	0	0.89125	1	0.64202	0	0	0	0	0
RHG21	0	0	0	0	0.17176	0.14745	0	0	0.061782	0	0	0	0.0049486	0	0	0
RHG23	0	0	0	0	0	0.0058137	0	0	1	1	0.22379	0	0	0.0050106	0	0
RHG32	0	0.10728	0	0	0	0	0	0	1	1	0.96148	0.64852	0	0	0	0
RHG33	0	0	0	0	0	0	0	0	0.069696	0.097431	0	0	0	0	0	0
RHG39	0	0.067507	0	0	0	0	0	0	0.8817	1	0	0	0	0	0	0
RHG42	0	0	0	0	0	0	0	0	0	0	0	0	0	0	0	0
RHOA	0	0	0	0	0	0	0	0	1	1	0.15164	1	0	0	0	0
RHOB	0.038781	0	0	0	0.05803	0	0	0	1	0.79656	0	0.067321	0	0	0	0
RHOG	0	0	0	0	0	0	0	0	1	1	0.93457	0	0	0	0	0
RICTR	0	0	0	0	0	0	0	0	0.14951	0.20832	0.091474	0	0	0	0	0
RIMB2	0	0	0	0	0	0	0	0	1	1	0.49707	0.033242	0	0	0	0
RIMS1	0	0.014123	0	0	0	0	0	0	0.84127	1	0.23388	0.094964	0	0.071012	0	0
RIMS2	0	0	0	0	0	0	0	0	0.72122	1	0.21146	0.2014	0	0.026049	0	0
RL10	0	0	0	0	0	0	0	0	1	1	1	0	0	0	0	0
RL10A	0	0.14096	0	0	0	0	0	0	1	1	0.59825	0.024175	0	0	0	0
RL11	0	0	0	0	0	0	0	0	0.21537	0.43972	0.57592	0	0	0	0	0
RL12	0	0.23683	0	0	0	0	0	0	1	1	1	0.30534	0	0	0	0
RL13	0	0.019916	0	0	0	0	0	0	1	1	0.42224	0	0	0	0	0
RL13A	0	0	0	0	0	0	0	0	1	1	0.81227	0	0	0	0	0
RL14	0	0	0	0	0	0	0	0	1	1	0.77444	0.0017648	0	0	0	0
RL15	0	0.11481	0	0	0	0	0	0	1	1	0.676	0	0	0	0	0
RL17	0	0	0	0	0	0	0	0	1	1	1	0.031751	0	0	0	0
RL18	0	0.12544	0	0	0	0	0	0	1	1	0.70599	0.12031	0	0	0	0
RL18A	0	0.095243	0	0	0	0	0	0	1	1	1	0	0	0	0	0
RL19	0	0.026858	0	0	0	0	0	0	1	1	0.3291	0	0	0	0	0
RL21	0	0	0	0	0	0	0	0	1	1	1	0.18597	0	0	0	0
RL22	0	0	0	0	0	0	0	0	0.43488	0.057907	0	0	0	0	0	0
RL22L	0	0	0.43389	0	0	0	0	0	0	0	0	0	0	0	0	0
RL23	0	0	0	0	0	0	0	0	1	1	1	0	0	0	0	0
RL23A	0	0	0	0	0	0	0	0	1	1	0.74168	0.062605	0	0	0	0
RL24	0	0	0	0	0	0	0	0	1	1	1	0.095603	0	0	0	0
RL26	0	0	0	0	0	0	0	0	1	1	1	0	0	0	0	0
RL27	0	0	0	0	0	0	0	0	1	1	0.96523	0.037913	0	0	0	0
RL27A	0	0.10553	0	0	0	0	0	0	1	1	0.60565	0	0	0	0	0
RL28	0	0	0	0	0	0	0	0	1	1	1	0.22294	0	0	0	0
RL29	0	0	0	0	0.15215	0	0	0	1	1	0.7698	0.52375	0.048719	0	0	0
RL3	0	0.21765	0	0	0	0.038275	0	0	1	1	0.66945	0	0	0.074429	0	0
RL30	0	0	0	0	0	0	0	0	1	1	0.82934	0	0	0	0	0
RL31	0	0	0	0	0	0	0	0	1	1	1	0.34222	0	0	0	0
RL32	0	0	0	0	0	0	0	0	1	1	0.53626	0.11625	0	0	0	0
RL34	0	0.018355	0	0	0	0	0	0	1	1	1	0	0	0.016087	0	0
RL35	0	0	0	0	0	0	0	0	0.8112	1	0.93786	0.39592	0	0	0	0
RL35A	0	0.042809	0	0	0	0	0	0	1	1	1	0.27875	0	0	0	0
RL36	0	0	0	0	0	0	0	0	1	1	0.92171	0.91794	0	0	0	0
RL36A	0	0.105	0	0	0	0	0	0	0.90286	1	0.63512	0.16826	0	0.10145	0	0
RL38	0	0	0.18826	0	0	0	0	0	0.2836	0.3212	0.93781	0	0	0	0	0
RL4	0	0.049296	0	0	0	0	0	0	1	1	0.46629	0	0	0.087874	0	0
RL5	0	0	0	0	0	0	0	0	0.43325	0.48693	0	0	0	0	0	0
RL6	0	0.10954	0	0	0	0	0	0	1	1	0.14665	0	0	0.061884	0	0
RL7	0	0.11847	0	0	0	0.022088	0	0	1	1	0.12034	0	0	0.05035	0	0
RL7A	0	0	0	0	0	0	0	0	1	1	0.9895	0	0	0	0	0
RL8	0	0	0	0	0	0.10965	0	0	1	1	0.11962	0	0	0.07175	0	0
RL9	0.025941	0	0	0	0	0	0	0	1	1	0.64448	0	0	0	0	0
RLA0	0	0.2109	0	0	0	0	0	0	1	1	0.45256	0	0	0	0	0
RLA1	0	0	0	0	0	0	0	0	1	1	1	0	0	0	0	0
RLA2	0	0.17498	0	0	0	0	0	0	1	1	1	0	0	0.10078	0	0
RLGPB	0	0	0	0	0	0	0	0	0	0	0	0	0	0	0	0
RM01	0	0	0	0	0	0	0	0	1	1	0	0	0	0	0	0
RM02	0	0	0	0	0	0	0	0	0.44467	1	0	0	0	0	0	0
RM03	0	0	0	0	0	0	0	0	1	1	0	0.89983	0	0	0	0
RM04	0	0	0	0	0	0	0	0	0.90486	0.9546	0	0	0	0.014833	0	0
RM09	0	0	0	0	0	0	0	0	1	1	0.99251	0.50572	0	0	0	0
RM10	0	0	0	0.163	0	0	0	0.16838	1	1	1	1	0	0	0	0.10204
RM11	0	0	0	0	0.042628	0.021913	0	0	1	1	0	0	0	0	0	0
RM12	0	0.016384	0	0	0	0	0	0	0.73949	1	0.048442	0	0	0	0	0
RM13	0	0.025314	0	0	0	0	0	0	1	1	0.45126	0.33422	0	0	0	0
RM15	0	0	0	0.025609	0	0	0	0.072974	1	1	0.9035	1	0	0	0	0.083393
RM16	0	0	0.063431	0	0	0	0	0	1	1	1	1	0	0	0	0
RM17	0	0	0	0	0	0	0	0	0	0	0	0	0	0	0	0
RM19	0	0	0	0	0	0	0	0	0.10794	0.13675	0	0.046295	0	0	0	0.0014944
RM20	0	0	0	0	0	0	0	0	1	1	1	0	0	0	0	0
RM21	0	0	0	0	0	0	0	0	1	1	0.29686	0.62595	0	0	0	0
RM22	0	0	0	0	0	0	0	0	1	1	0.98804	1	0	0	0	0
RM23	0	0	0.066304	0	0	0	0	0	1	1	1	1	0	0	0	0
RM24	0	0	0	0	0	0	0	0	1	1	0.60173	1	0	0	0	0
RM27	0	0	0	0	0	0	0	0	1	1	1	0.19294	0	0	0	0
RM28	0	0	0	0	0	0	0	0	0	0	0	0	0	0	0	0
RM37	0	0	0	0	0	0	0	0	1	1	0	0	0	0	0	0
RM38	0	0	0	0	0	0	0	0	1	1	0.046067	1	0	0	0	0
RM39	0	0	0	0	0	0	0	0	1	1	0	0	0	0	0	0
RM40	0	0	0	0	0	0	0	0	1	1	1	0.19318	0	0	0	0
RM41	0	0	0	0	0	0	0	0	1	1	0.53721	1	0	0	0	0
RM43	0	0	0	0	0	0	0	0	0	0	0	0	0	0	0	0
RM44	0	0	0	0	0	0	0	0	1	1	0.41019	0.60376	0	0	0	0
RM46	0.1223	0	0	0	0	0	0	0	1	1	0	0	0	0	0	0
RM47	0	0	0	0	0.04438	0.095959	0	0.16978	0.95757	1	0.37863	1	0	0	0	0
RM49	0	0	0	0	0	0	0	0	1	1	0.57831	1	0	0	0	0
RM50	0	0	0	0	0	0	0	0	1	1	1	0.28903	0	0	0	0
RM53	0.0052737	0	0	0	0	0	0	0	1	1	0.36515	0.90079	0	0	0	0
RO52	0.62291	0.30523	1	0.85366	0.7221	0.33638	1	0.99505	0	0	0	0	0.0967	0	0.7616	0.42718
ROA0	0	0	0	0	0	0	0	0	0.63131	0.56196	0.7175	0	0	0	0	0
ROA1	0	0	0	0	0	0	0	0	0	0	0	0	0	0	0	0
ROA2	0	0	0	0	0	0	0	0	1	0.98456	0	0	0.28186	0.18077	0	0
ROA3	0	0	0	0	0	0	0	0	1	1	0.17069	0	0.42749	0.49473	0	0
ROAA	0.79521	0.77791	0.51915	0.3243	0.69561	0.67455	0.37323	0.13358	0	0	0	0	0	0	0	0
ROGDI	0	0	0	0	0	0	0	0	1	1	0	0	0	0	0	0
RP3A	0	0	0	0	0	0	0	0	1	1	0	0	0	0	0	0
RPGF4	0	0	0	0	0	0	0	0	1	1	0.43613	0.0049293	0	0	0	0
RPN1	0	0	0	0	0	0	0	0	0.81512	0.60792	0	0	0	0	0	0
RPN2	0.080665	0	0	0	0	0	0	0	0.065429	0	0	0	0	0	0	0
RRBP1	0	0	0	0	0	0	0	0	1	1	0.32329	0	0	0	0	0
RS10	0	0.18514	0	0	0	0	0	0	0.56582	1	0.85366	0	0	0	0	0
RS11	0	0	0	0	0	0	0	0	1	1	0.96276	0	0	0	0	0
RS12	0	0.091999	0.10851	0	0	0	0.10853	0	0	0.36305	0.35791	0	0	0	0.098138	0
RS13	0	0	0	0	0	0	0	0	1	1	0.92158	0.29468	0	0	0	0
RS14	0	0	0	0	0	0	0	0	1	1	0.70853	0	0	0	0	0
RS15	0	0	0	0	0	0	0	0	0.98403	1	1	0	0	0	0	0
RS15A	0	0	0	0	0	0	0	0	1	1	0.80241	0	0	0	0	0
RS16	0	0	0	0	0	0	0	0	1	1	0.88334	0	0	0	0	0
RS18	0	0	0	0	0	0	0	0	0.61443	0.64616	0.44593	0	0	0	0	0
RS19	0	0	0	0	0	0	0	0	0	0	0	0	0	0	0	0
RS2	0	0	0	0	0	0	0	0	0.81139	1	0.12575	0	0	0	0	0
RS20	0.068969	0	0	0	0	0	0	0	1	0.87781	0.71911	0	0	0	0	0
RS23	0	0	0	0	0	0	0	0	1	1	0.93237	0.087586	0	0	0	0
RS24	0	0	0	0	0	0	0	0	1	1	1	0	0	0	0	0
RS25	0	0	0	0	0	0	0	0	0	0	0	0	0	0	0	0
RS26	0	0	0	0	0	0	0	0	1	1	1	1	0	0	0	0
RS27A	0	0	0	0	0	0	0	0	1	1	0.75622	0.1625	0	0	0	0
RS28	0	0	0	0.20103	0	0	0	0	0	0	0.90969	1	0	0	0.21355	0.51255
RS29	0	0	0	0	0	0	0	0	0.39252	0.34741	0.61829	0.061205	0	0	0	0
RS3	0.1326	0	0	0	0	0	0	0	1	0.64098	0	0	0	0	0	0
RS3A	0	0	0	0	0	0	0	0	1	1	0	0	0	0	0	0
RS4X	0	0	0	0	0	0	0	0	1	1	0.21772	0	0	0	0	0
RS5	0	0	0	0	0	0	0	0	0	0.10358	0.72334	0.18748	0	0	0	0
RS6	0	0	0	0	0	0	0	0	1	1	0	0	0	0.01574	0	0
RS7	0	0	0.015199	0	0	0	0	0	0.32918	0.32546	0.62431	0.045687	0	0	0	0
RS8	0	0.19724	0	0	0	0	0	0	1	1	0.55445	0	0	0	0	0
RS9	0	0	0	0	0	0	0	0	1	1	1	0.21672	0	0	0	0
RT02	0	0	0	0	0	0	0	0	1	1	0	0	0	0	0	0
RT05	0	0	0	0	0	0	0	0	1	1	0	0	0.1731	0.21611	0	0
RT06	0	0	0	0	0	0	0	0	1	1	0.75512	0.42735	0	0	0	0
RT07	0	0	0	0	0	0	0	0	1	1	0.43979	0.49719	0	0	0	0
RT09	0	0	0	0	0.28277	0.32731	0	0	1	1	0	0	0	0	0	0
RT10	0	0	0	0	0	0	0	0	1	1	0.54706	0.29597	0	0	0	0
RT11	0	0	0	0	0	0	0	0	1	1	0.40758	0.31756	0	0	0	0
RT15	0	0	0	0	0	0	0	0	1	1	0.13592	0.77	0	0	0	0
RT16	0	0.10985	0	0	0	0	0	0	1	1	0.47935	0.35392	0	0	0	0
RT17	0	0	0	0	0	0	0	0	1	1	1	1	0	0	0	0
RT18B	0	0	0	0	0	0	0	0	0	0	0	0	0	0	0	0
RT21	0	0	0	0.0087725	0	0	0	0.013459	1	1	1	1	0	0	0	0.036669
RT22	0.045831	0.055299	0	0	0	0	0	0	1	1	0	0	0	0	0	0
RT23	0	0.030596	0	0	0	0	0	0	1	1	0.71677	0.29942	0	0	0	0
RT25	0	0	0	0	0	0	0	0	1	1	0.71098	0.5901	0	0	0	0
RT26	0	0.070489	0	0	0	0	0	0	1	1	0.35156	0.44839	0	0	0	0
RT27	0	0	0	0	0	0	0	0	1	1	0	0.15084	0	0	0	0
RT28	0	0.0097636	0	0.43976	0	0	0	0	1	1	1	1	0	0	0	0
RT29	0	0	0	0	0	0	0	0	1	1	0	0	0	0	0	0
RT30	0	0.025581	0	0	0	0	0	0	1	1	0	0	0	0	0	0
RT31	0.017381	0.03645	0	0	0	0	0	0	1	1	0	0.54277	0.11003	0.13542	0	0
RT33	0.22712	0.079225	0.33594	0.2787	0	0	0	0.050789	1	1	1	1	0	0	0	0.041257
RT34	0	0	0	0	0	0	0	0	1	1	0.37122	0.37065	0	0	0	0
RT35	0	0	0	0	0	0	0	0	1	1	0	0	0	0	0	0
RT36	0	0	0	0	0	0	0	0	1	1	1	1	0	0	0	0
RTCB	0	0	0	0	0	0	0	0	1	0.66637	0	0.13155	0.30956	0.14796	0	0
RTN1	0	0	0	0	0	0	0	0	0.75735	0.55805	0	0	0	0	0	0
RTN3	0	0	0	0	0	0	0	0	0.37981	0.32567	0	0	0	0	0	0
RTN4	0	0	0	0	0	0	0	0	0.60314	0.80217	0.089366	0	0	0	0	0
RTRAF	0	0	0	0	0	0	0	0	0.81398	0.23232	0.43391	0.37929	0	0	0	0
RU17	0	0	0	0	0.029794	0	0	0.1751	0	0	0	0	0.088263	0.0098737	0	0.24341
RU2A	0	0	0	0	0	0	0	0	1	1	0.94998	1	0	0	0	0
RU2B	0	0	0	0	0	0	0	0	1	1	1	1	0	0	0	0
RUFY3	0	0	0	0	0	0	0	0	0.82854	1	0	0.10277	0	0	0	0
RUN3A	0	0	0	0	0	0	0	0	1	1	1	1	0	0	0	0
RUVB1	0	0	0	0	0	0	0	0	1	1	0.078306	0	0	0	0	0
RUXE	0	0.13438	0	0.30442	0	0	0	0	0.90131	1	0.44853	1	0	0	0	0
RYR2	0	0	0	0	0	0	0	0	0.19648	1	0.2293	0	0	0	0	0
S10A8	0.40944	0.4663	0.81344	0.88742	0	0	0.31069	0.38226	0	0	0.4045	0.58205	0.13407	0.20946	0.6833	0.77536
S10A9	0.17888	0.32835	0.91415	0.64679	0	0	0.6177	0.28553	0	0	0	0	0.19013	0.38873	1	0.80298
S12A5	0.19004	0.083879	0	0	0.01218	0	0	0	0.48169	0.15277	0	0	0.18585	0.044793	0	0
S27A1	0	0	0	0	0	0	0	0	0	0	0	0	0	0	0	0
S27A4	0	0	0	0	0	0	0	0	0.42621	0.38692	0	0	0	0	0	0
S4A10	0	0	0	0	0	0	0	0	1	1	0.82258	0	0	0	0	0
S4A4	0	0	0	0	0	0	0	0	1	1	0	0	0	0	0	0
S4A8	0	0.0056649	0	0	0	0.0093612	0	0	0	0	0	0	0	0.022264	0	0
S61A1	0	0	0.070926	0	0	0	0.092287	0	1	1	1	0	0	0	0.23181	0
S61A2	0	0	0.40297	0	0	0	0.48608	0	1	1	1	0	0	0	0.49006	0
S6A11	0	0	0	0	0	0	0	0	0.98323	0	0	0	0	0	0	0
SAC1	0	0	0	0	0.38267	0.3946	0.0036992	0	0.9445	0.97579	0	0	0	0	0	0
SAFB1	0.16947	0	0	0	0	0	0	0	1	1	0.99476	1	0	0	0	0
SAHH2	0.026302	0	0	0.014323	0.01032	0	0	0	0.062573	0	0	0.024144	0	0	0	0
SAHH3	0	0	0	0.079853	0	0	0	0	0	0	0	0.15979	0	0	0	0.068477
SAM50	0	0	0	0	0	0	0	0.012413	0	0	0	0	0	0	0	0.056508
SAP18	0.17274	0	0.14451	0.033641	0.20998	0	0.17318	0.040722	1	1	1	1	0	0	0	0
SC11C	0	0	0	0.051996	0	0	0	0.065254	1	1	1	1	0	0	0	0.046138
SC22B	0.0061841	0	0	0	0.02798	0.012315	0	0	1	1	0.62295	0	0	0	0	0
SC61B	0	0	0	0	0	0	0	0	1	1	0.73783	0	0	0	0	0
SCAI	0	0	0	0	0	0	0	0	1	1	0.52796	0	0	0	0	0
SCAM5	0.24867	0.23927	0.14858	0.1956	0.1298	0.11832	0.019593	0.071711	1	1	1	1	0	0	0	0
SCAP	0	0	0	0	0	0	0	0	0	0	0	0	0	0	0	0
SCFD1	0	0	0	0	0	0	0	0	0	0	0	0	0	0	0	0
SCG2	0	0	0	0	0	0	0	0	1	1	0.28318	1	0	0	0	0
SCGR3	0	0	0.16905	0.73976	0	0	0.11107	0.79607	0	0	0	0.69331	0	0	0	0.40277
SCGR4	0.16904	0	0.44391	0.46786	0	0	0.3109	0.3351	0	0	0.25413	0.30686	0	0	0	0
SCGR6	0	0	1	1	0	0	1	1	0	0	1	1	0	0	1	1
SCGR7	0	0	0.61131	0.42383	0	0	0.68458	0.46144	0	0	0.61822	0.083295	0	0	0.58369	0.33684
SCGR8	0	0	0	0.83733	0	0	0	1	0	0	0	0.81331	0	0	0	0.45806
SCGRX	0	0	0.48126	0.35911	0.0042062	0.59284	1	1	0	0.97676	1	1	0	0	0.57038	0.41363
SCPDL	0	0	0	0	0	0	0	0	0	0	0	0	0	0	0	0
SCRIB	0.32872	0.35213	0	0.093813	0	0	0	0	0.90722	0.98067	0	0.1693	0	0	0	0
SCYL1	0.13772	0	0	0	0.17931	0	0	0	0.38198	0	0	0	0	0	0	0
SDF2L	0	0	0	0	0	0	0	0	1	1	0.96956	0	0	0	0	0
SDHA	0	0	0	0	0	0	0	0	0.76707	0.77936	0	0	0.023386	0.028197	0	0
SEC62	0	0	0	0	0	0	0	0	1	1	0.95672	0	0	0	0	0
SEH1	0	0	0	0	0	0	0	0	1	1	0.67143	0	0	0	0	0
SEP11	0.303	0	0	0	0.37813	0	0	0	0.79991	0	0	0	0	0	0	0
SEPT2	0	0	0	0	0	0	0	0	0.44904	0.418	0	0	0	0	0	0
SEPT3	0.022571	0	0	0	0.035395	0	0	0	0.57838	0.41491	0	0	0	0	0	0
SEPT4	0	0	0	0	0	0	0	0	0.32161	0.29374	0	0	0	0	0	0
SEPT5	0	0	0	0	0	0	0	0	1	1	0	0	0	0	0	0
SEPT6	0	0	0	0	0	0	0	0	0	0	0	0	0	0	0	0
SEPT7	0	0	0	0	0	0	0	0	0	0.26075	0	0	0	0	0	0
SEPT8	0	0.024315	0	0	0	0.0058879	0	0	0.23109	0.53888	0	0	0	0.064769	0	0
SEPT9	0	0	0	0	0	0	0	0	0.43935	0	0	0	0	0	0	0
SERA	0	0	0	0.078852	0	0	0	0.070242	0	0	0	0.0103	0	0	0	0
SERPH	0	0	0	0	0	0	0	0	1	0	0	0	0	0	0	0
SF3A1	0	0	0	0	0	0	0	0	1	1	1	1	0	0	0	0
SF3A3	0	0	0	0	0	0	0	0	1	1	1	1	0	0	0	0
SF3B1	0	0	0	0	0	0	0	0	1	1	0.81617	1	0	0	0	0
SF3B3	0.017486	0	0	0	0.030474	0	0	0	1	1	1	1	0	0	0	0
SF3B6	0	0	0	0	0	0	0	0	1	1	1	0.66779	0	0	0	0
SFPQ	0	0	0	0	0	0	0	0	0	0	0	0	1	0.91244	0.52654	1
SGPL1	0	0	0	0	0	0	0	0	1	1	0	0	0	0	0	0
SH2D5	0	0	0	0.0022477	0	0	0	0.017966	1	1	0.11691	1	0	0	0	0
SHAN1	0	0	0	0	0	0.15305	0	0	1	1	0.52744	0.27084	0.32198	0.91413	0.12866	0
SHAN2	0	0	0	0	0	0	0	0	1	1	0.19727	0.057782	0	0.30275	0	0
SHAN3	0	0.076165	0	0	0	0.096378	0	0	1	1	0.28963	0.17605	0	0.15834	0	0
SHFL	0	0	0	0	0	0	0	0	1	1	0.61319	0	0	0	0	0
SHSA6	0	0	0	0	0	0.0049167	0	0	1	1	0	1	0.37071	0.33036	0	0.2367
SHSA7	0	0	0	0	0	0	0	0	1	1	0	0	0.16654	0.1657	0	0
SI1L1	0	0.10391	0	0	0	0	0	0	1	1	0.076957	0.1751	0	0.11675	0	0
SI1L2	0	0.083452	0	0	0	0	0	0	1	1	0.10544	0.12565	0	0	0	0
SI1L3	0	0	0	0	0	0	0	0	0	0.0075292	0	0	0	0	0	0
SIN1	0	0	0	0	0	0	0	0	0	0	0	0	0	0	0	0
SIR2	0.10356	0	0	0	0.091996	0	0	0	0.76626	0.15475	0	0	0	0	0	0
SKP1	0	0	0.045995	0	0	0	0	0	1	1	1	0.72273	0	0	0	0
SKT	0	0	0	0	0	0.054967	0	0	1	1	0.37913	0.53338	0	0	0	0
SLMAP	0	0	0	0	0	0	0	0	0	0	0	0	0	0	0	0
SMAP2	0	0	0	0	0	0	0	0	0	0	0	0	0	0	0	0
SMC3	0	0	0	0	0	0	0	0	0	0	0	0	0	0	0	0
SMD1	0	0	0	0.019457	0	0	0	0.031053	1	1	0.66201	1	0	0	0	0
SMD2	0.091146	0.093365	0	0.34552	0	0	0	0.307	1	1	0.51847	1	0.11153	0.11449	0	0.44395
SMD3	0	0.14289	0	0.163	0	0.10522	0	0.13128	0.8966	1	0.3564	1	0	0	0	0
SMU1	0	0	0	0	0	0	0	0	1	1	1	1	0	0	0	0
SNAB	0.043378	0.030535	0	0	0	0	0	0	0.87573	0.8371	0	0	0	0	0	0
SNAG	0	0	0	0	0	0	0	0	0.14256	0.12465	0	0	0	0	0	0
SND1	0	0	0	0	0	0	0	0	0	0	0	0	0	0	0	0
SNG1	0.27845	0.28031	0.25553	0	0	0	0	0	1	1	1	0	0	0.020352	0.011088	0
SNG3	0.11986	0	0.023673	0	0.0097672	0	0	0	1	0.95998	0.92802	0	0	0	0	0
SNP25	0.23231	0.056905	0.0062069	0	0	0	0	0	0.8343	0.29102	0.11024	0	0	0	0	0
SNP47	0	0	0	0	0	0	0	0	1	1	0	0.10189	0	0	0	0
SNPH	0	0	0	0.003819	0	0	0	0.014991	0	0	0	0.013266	0	0	0	0.068093
SNRPA	0	0	0	0.34599	0	0.0002428	0	0.43727	0	0	0	0	0	0	0	0.47315
SNTA1	0	0	0	0	0	0	0	0	1	1	0.37021	0	0.26602	0.25522	0	0
SNTB1	0	0	0	0	0	0	0	0	1	1	0.037776	0	0	0	0	0
SOGA1	0	0	0	0	0	0	0.10797	0	1	1	1	1	0	0	0	0
SOGA3	0	0	0	0	0	0	0	0	1	1	0	0	0	0	0	0
SORL	0	0	0	0	0	0	0	0	0	0	0	0	0	0	0	0
SPAS2	0	0	0	0	0	0	0	0	1	1	1	0	0	0	0	0
SPB12	0.54555	0.55503	0	0.47071	0.57433	0.58586	0	0.48283	0.10789	0.1367	0	0	0.19307	0.20546	0	0.11367
SPB4	0.025236	0.0010886	0	0.028443	0.44562	0.41653	0.36483	0.42898	0	0	0	0	0.89722	0.86567	0.7699	0.85511
SPCS2	0	0	0	0	0	0	0	0	1	1	1	0	0	0	0	0
SPF27	0	0	0	0	0	0	0	0	1	1	0.59901	0.26673	0	0	0	0
SPG7	0	0	0	0	0	0	0	0	1	1	1	1	0	0	0	0
SPHK2	0	0	0	0	0	0	0	0	0	0.12088	0	0	0	0	0.015778	0
SPIR1	0.01923	0	0	0	0.014229	0	0	0	1	1	0.453	0	0	0	0	0
SPKAP	0	0	0	0	0	0	0	0	1	1	1	0.39294	0	0	0	0
SPON1	0	0	0	0.032368	0	0	0	0.044319	0	0	0	0	0.69021	0.7437	0.66856	0.75363
SPRY3	0	0	0	0	0	0	0	0	1	1	0.16063	0	0	0	0	0
SPS2L	0	0	0	0	0	0	0	0	1	1	0	0	0	0	0	0
SPTB1	0	0	0	0	0	0	0	0	0	0.43774	0.067428	0.13344	0	0	0	0
SPTB2	0	0.065974	0	0	0	0	0	0	0.23194	1	0.60171	0	0	0	0	0
SPTN1	0	0.05726	0	0	0	0	0	0	0.13187	1	0.58083	0.055485	0	0	0	0
SPTN2	0	0.068045	0	0	0	0.016362	0	0	0	1	0.45906	0	0	0	0	0
SPTN4	0	0	0	0	0	0	0	0	0	1	0.057647	0	0	0.18154	0	0
SQOR	0	0	0	0	0	0	0	0	1	1	0	0	0	0	0	0
SRBS1	0	0	0	0	0	0	0	0	0.5912	1	0	0	0	0.059995	0	0
SRBS2	0	0	0	0	0	0	0	0	0.12016	1	0	0.2075	0	0	0	0
SRC8	0	0	0	0	0	0	0	0	0.17041	0.29216	0	0	0	0	0	0
SRCN1	0	0.076821	0	0	0	0	0	0	1	1	0.33315	0.63524	0	0	0	0
SRGP1	0	0	0	0	0	0	0	0	0	0	0	0	0	0	0	0
SRPK1	0	0	0	0	0	0	0	0	0	0	0	0	0	0	0	0
SRPK2	0	0	0	0	0	0	0	0	1	1	0	0	0	0	0	0
SRPRB	0	0	0	0	0	0	0	0	0	0.011371	0	0	0	0	0	0
SRS10	0	0	0	0	0	0	0	0	1	1	1	0.42465	0	0	0	0
SRSF3	0	0	0	0	0	0	0	0	0.6779	0.70304	0.034066	0	0	0	0	0
SSBP	0	0	0	0	0	0	0	0	1	1	0.13448	0.23632	0	0	0	0
SSBP2	0	0	0	0	0	0	0	0	1	1	1	1	0	0	0	0
SSRA	0	0	0	0	0	0	0	0	1	1	0.55369	1	0	0	0	0.085307
SSRD	0	0.059998	0	0	0	0	0	0	1	1	1	0.29315	0	0	0	0
SSRG	0	0	0	0	0	0	0	0	1	1	1	1	0	0	0	0
STAU1	0.0023482	0	0	0	0	0	0	0	1	1	0.25804	0	0.047177	0.034639	0	0
STAU2	0	0	0	0	0	0	0	0	1	1	0.056607	0	0	0	0	0
STIM2	0.02155	0.0062869	0	0	0	0	0	0	0	0	0	0	0	0	0	0
STML2	0	0	0	0	0	0	0	0	0.42938	0.3906	0	0	0	0	0	0
STMN3	0	0.062636	0	0	0	0	0	0	1	1	1	0	0	0	0	0
STRN	0	0	0	0	0	0	0	0	0.12706	0.23318	0	0	0	0	0	0
STRN3	0	0	0	0	0	0	0	0	0	0	0	0	0.1151	0.091254	0	0
STRN4	0	0	0	0	0	0	0	0	0	0	0	0	0	0	0	0
STRP1	0	0	0	0	0	0	0	0	0	0	0	0	0	0	0	0
STT3B	0	0	0.015737	0	0	0	0.028119	0	0	0	0.050508	0	0	0	0.050125	0
STX1A	0.015549	0.46463	0	0	0	0	0	0	0.11543	1	0	0	0	0	0	0
STX1B	0.12136	0	0	0	0.0087696	0	0	0	1	0.92416	0	0	0.11385	0	0	0
STX5	0	0	0.11614	0	0	0	0.12906	0	0.97579	0.98143	1	0	0	0	0.071306	0
STXB1	0.11746	0	0	0	0	0	0	0	0.83045	0.23435	0	0	0	0	0	0
SUCA	0	0	0	0	0	0	0	0	1	1	0	0	0	0	0	0
SUCB1	0.42132	0.52373	0	0	0.088275	0.21244	0	0	1	1	0.36015	0.59979	0	0	0	0
SUCB2	0	0	0	0	0	0	0	0	1	1	1	1	0	0	0	0
SUCO	0	0	0	0	0	0	0	0	0.029902	0.31094	0	0	0	0	0	0
SUGP2	0	0	0.0021846	0.01207	0	0	0.023025	0.03565	1	1	1	1	0	0	0	0
SV2A	0.1718	0	0	0	0.22506	0	0	0	1	0.71518	0.69869	0	0	0	0	0
SV2B	0	0	0	0	0	0	0	0	1	1	0.96463	0	0	0	0	0
SYCP1	0	0.082174	0	0.78517	0	0	0	0.76585	0	0	0	1	0	0	0	0.084217
SYDC	0	0	0	0	0	0	0	0	1	1	0	0	0	0	0	0
SYEP	0	0	0	0	0	0	0	0	0	0.066108	0	0	0	0	0.0049654	0
SYFA	0	0.061031	0	0	0	0	0	0	1	1	0	0	0	0	0	0
SYGP1	0	0	0	0	0	0	0	0	1	1	0.63665	0.26367	0	0.18015	0	0
SYIC	0	0	0	0	0.019939	0	0	0	0	0	0.12685	0	0.052428	0	0	0
SYIM	0.011308	0	0	0	0	0	0	0	1	1	0.031705	0.81226	0	0	0	0
SYMPK	0	0	0	0	0	0	0	0	0	0	0	0	0	0	0	0
SYN1	0.02074	0	0	0	0	0	0	0	1	1	0	0	0	0	0	0
SYN2	0	0.0069367	0	0	0	0	0	0	1	1	0	0	0	0	0	0
SYN3	0	0	0	0	0	0	0	0	1	1	0	0	0.0488	0.028529	0	0
SYNE1	0.024703	0.00076643	0.19396	0	0.032733	0.003669	0.23468	0	0.62325	0.54985	0.97312	0	0	0	0.11828	0
SYNJ1	0	0	0	0	0	0	0	0	0	0	0	0	0	0	0	0
SYNPO	0.50935	0.39197	0	0	0.50818	0.36563	0	0	1	0.76293	0	0	0.21426	0.058106	0	0
SYPH	0.077313	0	0	0	0.14023	0	0	0	1	1	0.91499	0	0	0	0	0
SYT1	0.037782	0	0	0	0.031634	0	0	0	0.90517	0.28676	0	0	0.14547	0	0	0
SYT11	0	0	0	0	0	0	0	0	1	1	1	0.26922	0	0	0	0
SYT12	0	0	0	0	0	0	0	0	1	1	1	1	0	0	0	0
SYT2	0.10128	0	0	0	0.50923	0	0.32721	0	0	0	0	0	0.20059	0	0.029994	0
SYT7	0.0024426	0	0	0	0	0	0	0	0.97089	0.95626	0	0.82878	0.032715	0.025872	0	0.017318
SYTL5	0	0	0	0	0	0	0	0	0	0	0	0	0	0	0	0
SYUB	0	0	0.31582	0.56813	0.10046	0	0.52942	0.84057	0	0	0	0	0	0	0	0
SYVC	0	0	0	0	0	0	0	0	0.15568	0.079616	0	0	0	0	0	0
T229A	0	0	0	0	0	0	0	0	0	0	0	0	0	0	0	0
TADBP	0	0	0	0	0	0	0	0	1	1	1	1	0	0	0	0
TAM41	0	0	0	0	0	0	0	0	1	1	0.16098	0.93376	0	0	0	0
TANC2	0	0.17176	0	0	0	0	0	0	0.69964	1	0	0	0	0	0	0
TAPT1	0	0	0	0	0	0	0	0	0	0	0	0	0	0	0	0
TAU	0.06354	0.052367	0	0	0	0	0	0	1	1	0	0	0	0	0	0
TBA4A	0	0.061059	0	0	0	0	0	0	1	1	0.57847	0.028906	0	0	0	0
TBA8	0	0	0	0	0	0	0	0	1	1	1	0.057249	0	0	0	0
TBAL3	0	0	0	0	0	0	0	0	1	1	0	0.38561	0	0	0	0
TBB2A	0	0.068712	0	0	0	0	0	0	1	1	1	0	0	0	0	0
TBB2B	0	0	0	0	0	0	0	0	1	1	0.24118	0	0	0	0	0
TBB3	0	0.086312	0	0	0	0	0	0	1	1	0.58957	0.023627	0	0	0	0
TBB4A	0	0	0	0	0	0	0	0	1	1	0.31606	0.064841	0	0	0	0
TBB4B	0	0.062353	0	0	0	0	0	0	1	1	0.4552	0.098996	0	0	0	0
TBB5	0	0.037194	0	0	0	0	0	0	1	1	0.84586	0	0	0	0	0
TBB6	0	0	0	0	0	0	0	0	1	1	1	0.65147	0	0	0	0
TBG1	0	0	0.029135	0	0	0	0	0	1	1	1	0.83977	0	0	0	0
TBK1	0	0	0	0	0	0	0	0	0.089223	0.15884	0	0	0	0	0	0
TBL2	0	0	0	0	0	0	0	0	1	1	0.34851	0	0	0	0	0
TCPA	0	0.00027769	0	0	0	0	0	0	1	1	0	0	0	0	0	0
TCPB	0	0	0	0	0	0	0	0	0	0	0	0	0	0	0	0
TCPD	0	0	0	0	0	0	0	0	1	1	0	0	0	0	0	0
TCPE	0	0	0	0	0.024381	0	0	0	1	1	0.65395	0	0	0	0	0
TCPG	0	0	0	0	0	0	0	0	0	0	0	0	0	0	0	0
TCPH	0	0	0	0	0	0	0	0	1	1	0.046081	0	0	0	0	0
TCPQ	0	0	0	0	0	0	0	0	0	0	0	0	0	0	0	0
TCPZ	0	0	0	0	0.009019	0	0	0	0.19089	0	0	0	0.064619	0	0	0
TDRD3	0	0	0	0	0	0	0	0	0.95406	0.13627	0	0	0	0	0	0
TECR	0	0	0	0	0	0	0	0	1	1	0.70278	0	0	0	0	0
TENA	0	0	0	0	0	0	0	0	0.63881	1	1	1	0	0	0	0
TENR	0	0.273	0	0	0	0.18062	0	0	1	1	1	1	0	0	0	0
TERA	0	0	0	0	0	0	0	0	0	0	0	0	0	0	0	0
TGO1	0	0	0	0	0	0	0	0	1	1	0.36723	0	0.54464	0.75872	0.066582	0
THIKA	0	0.2523	0	0	0	0	0	0	1	1	0	0	0	0	0	0
THIL	0.16653	0.21266	0	0	0	0	0	0	1	1	0.20276	0.70075	0	0	0	0
THIM	0	0	0	0	0	0	0	0	1	1	0.15301	0.2536	0	0	0	0
THIO	0.15645	0.075232	0	0.42499	0.034344	0	0	0.36357	0	0	0	0.45696	0	0	0	0
THOC4	0.35503	0	0	0.36821	0	0	0	0	0	0	0	0	0.54456	0.019747	0	0.55178
THTM	0	0	0	0	0	0	0	0	1	1	1	1	0	0	0.02081	0
TIF1B	0	0	0	0	0	0	0	0	1	1	0.10211	0	0	0	0	0
TIM44	0	0	0	0	0	0	0	0	0	0	0	0	0	0	0	0
TIM50	0	0	0	0	0	0	0	0	0.93476	0.87035	0	0	0	0	0	0
TM214	0	0	0	0	0.96802	0.95701	0.39605	0.29312	0	0	0	0	0	0	0	0
TM35A	0	0	0	0	0	0	0	0	0.96881	0.98561	0.91099	0	0	0	0	0
TM38A	0	0	0.18343	0	0	0	0.23829	0	1	1	1	0.011258	0	0	0.24977	0
TMCC2	0.031137	0.02933	0	0	0	0	0	0	0	0	0	0	0.0072495	0	0	0
TMCC3	0.017603	0	0	0	0.034377	0	0	0	0.71224	0.64139	0	0	0	0	0	0
TMCO1	0	0	0	0	0	0	0	0	1	1	1	1	0	0	0	0
TMED2	0	0	0	0	0	0	0	0	0	0	0	0	0	0	0	0
TMED9	0	0	0.0022571	0	0.020114	0.0095164	0.036044	0	0.45754	0.43109	0.41355	0	0.081721	0.070164	0.093616	0
TMM33	0	0	0	0	0	0	0	0	0.99055	1	0.44129	0	0	0	0	0
TMOD1	0	0	0	0	0	0	0	0	1	1	1	0.36767	0	0	0	0
TMOD2	0	0	0	0	0	0	0	0	1	1	0.60819	0	0	0	0	0
TMUB1	0	0	0	0	0	0	0	0	0	0	0	0	0	0	0	0
TMX2	0	0	0	0	0	0	0	0	0	0	0	0	0	0	0	0
TMX3	0	0	0	0	0	0	0	0	0	0	0	0	0	0	0	0
TMX4	0	0	0	0	0	0	0	0	0	0	0	0	0	0	0	0
TNIK	0	0	0	0	0	0	0	0	0.35521	0.79387	0	0	0.04026	0.22795	0	0
TNR6B	0	0	0	0	0	0	0	0	0	0	0	0	0.75117	0.76154	0.65456	0.0092038
TOP2B	0	0	0	0	0	0	0	0	0.112	0.22606	0	0	0	0	0	0
TOP3B	0	0	0	0	0	0	0	0	0.37544	0	0	0	0.15366	0	0	0
TPC10	0	0	0	0	0	0	0	0	0	0	0	0	0	0	0	0
TPC6B	0	0	0	0	0	0	0	0	0.42678	1	0.92569	1	0	0	0	0
TPIS	0	0.017345	0	0	0.0077922	0.11251	0	0	1	1	0	0	0	0.02644	0	0
TPM4	0	0	0	0	0	0	0	0	0	0.10661	0	0	0	0	0	0
TPPC3	0.13198	0.075588	0	0	0	0	0	0	1	1	0.85474	0.0028602	0	0	0	0
TPPC5	0	0	0.40897	0	0	0	0	0	1	1	1	0.18787	0	0	0	0
TPPC9	0	0	0	0	0	0	0	0	0	0.58974	0	0	0.021114	0.28778	0	0
TPPP	0.47186	0.010275	0	0.088226	0.30135	0	0	0	1	0	0	0	0	0	0	0
TR150	0	0	0	0.0054968	0	0	0	0.011067	1	0	0.9035	1	0	0	0	0.040021
TRA2B	0	0	0	0	0	0	0	0	1	1	0.99713	1	0	0	0	0
TRAF3	0	0	0	0	0	0	0	0	0.17105	0.18554	0	0	0.05068	0.056814	0	0
TRI32	0	0	0.11886	0	0	0	0.17951	0	0	0	0.25158	0	0	0	0.17424	0
TRI46	0	0	0	0	0	0	0	0	1	1	0	0	0	0	0	0
TRIM2	0	0	0	0	0	0	0	0	1	1	0	0	0	0	0	0
TRIM3	0	0	0	0	0	0	0	0	1	1	0	0	0	0.12426	0	0
TRIM9	0	0	0	0	0	0	0	0	0.88647	1	0	0	0	0.056113	0	0
TRIO	0	0	0	0	0.0063834	0.00047885	0	0	1	1	0.22514	0	0.068859	0.062437	0	0
TRM1L	0	0	0	0	0	0	0	0	0	0	0	0	0	0	0	0
TRPC1	0	0	0	0	0	0	0	0	0	0	0	0	0	0	0	0
TRPC4	0	0	0	0	0	0	0	0.0030521	0	0	0	0	0	0	0	0.021857
TRPC5	0	0	0	0	0	0	0	0	0.43139	0.27089	0	0.6033	0	0	0	0
TRPM3	0.70065	0.5245	0.7055	0.087709	0.38804	0.17395	0.41909	0	0.61978	0.07319	0.64776	0	0	0	0	0
TRPM7	1	1	1	1	1	1	1	1	1	1	1	1	1	1	1	1
TRY1	0	0	0.12456	0.25107	0.0023727	0	0.59113	0.75967	0	0	0.27316	0.6468	0.53782	0.27713	1	1
TRY3	0	0	0.43757	0.57586	0.02949	0	0.64053	0.81407	0	0	0	0.26728	0.042892	0	0.70521	0.89666
TRYP	0	0	0.40054	0.42586	0	0	0.48651	0.51997	0	0	0	0.0060855	0	0	0.52847	0.56651
TS101	0	0	0	0	0	0	0	0	1	1	1	1	0	0	0	0
TSC1	0	0	0	0	0	0	0	0	0	0.017763	0.98113	0	0	0	0	0
TSC2	0	0	0	0	0	0	0	0	0.020663	0	0	0	0	0	0	0
TSN9	0	0	0	0	0	0	0	0	0	0	0	0	0	0	0	0
TSP4	0	0	0	0	0	0	0	0	0	0	0	0	0	0	0	0
TTC3	0	0	0	0	0	0	0	0	0	0	0	0	0	0	0	0
TTC7B	0.13481	0.083741	0	0	0	0	0	0	0	0	0	0	0	0	0	0
TTLL1	0	0	0	0.10895	0	0	0	0.11663	1	1	1	1	0.072658	0	0.074138	0.26887
TUSC3	0	0	0	0	0	0	0	0	0.87823	0.84552	0	0	0	0	0	0
U2AF2	0	0	0	0.089158	0	0	0	0	0	0	0	0	0	0	0	0.0078631
U520	0	0	0	0	0	0	0	0	0.56847	1	0.72874	0.86848	0	0	0	0
U5S1	0	0	0	0	0	0	0	0	1	1	1	1	0	0	0	0
UBE3B	0	0	0	0	0	0	0	0	0	0	0	0	0	0	0	0
UBL4A	0	0	0	0.035543	0	0	0	0.026686	1	1	1	1	0	0	0	0.10096
UBP31	0.21731	0.20943	0.09738	0	0	0	0	0	1	1	1	0	0	0	0	0
UBP46	0	0	0	0	0	0	0	0	1	1	0.00026702	0	0	0	0	0
UBP5	0	0	0.11886	0	0	0	0.18301	0	0.0661	0.014972	0.39861	0	0.060452	0.038557	0.22014	0
UBP54	0	0	0	0	0	0	0	0	1	0.95205	0.62541	0	0	0	0	0
UFL1	0	0	0.01992	0	0.0041927	0	0.0606	0	0	0	0.088087	0	0.041292	0	0.099288	0
UIF	0	0	0	0	0	0	0	0	1	1	0.87726	0.94012	0	0	0	0
UN13A	0	0.031407	0	0	0	0	0	0	0.71093	1	0	0	0	0.052778	0	0
UN13C	0	0	0	0	0	0	0	0	0.85662	1	0.1999	0.031127	0	0	0	0
USP9X	0	0	0	0	0	0	0	0	0	0	0	0.040271	0.27084	0	0.24997	0.28455
UT1	0	0	0	0	0	0	0	0	0	0	0	0	0	0	0	0
VA0D1	0	0	0	0	0	0	0	0	1	1	0.9449	0	0	0	0	0
VAC14	0	0	0.10555	0	0	0	0.13567	0	0.23047	0.37053	0.59665	0	0	0	0.17882	0
VAMP1	0	0	0	0	0	0	0	0	1	1	1	0	0	0	0	0
VAMP2	0	0	0.30098	0	0	0	0.10758	0	1	1	1	0	0	0	0	0
VAMP4	0.62391	0.61821	0.58835	0.5722	0	0.020355	0	0	1	1	0.84964	0.82509	0.00013275	0	0.0086121	0
VAPA	0.17883	0	0	0	0	0	0	0	1	1	0	0	0	0	0	0
VAPB	0.25752	0.0036877	0	0	0	0	0	0	1	1	0.30934	0	0	0	0	0
VAS1	0.010608	0.0023604	0	0	0	0	0	0	1	1	1	0.38095	0	0	0	0
VATA	0	0	0	0	0	0	0	0	1	1	0	0	0	0	0	0
VATB2	0.059715	0	0	0	0	0	0	0	1	1	0.35544	0	0	0	0	0
VATC1	0	0	0	0	0	0	0	0	0	0.11974	0	0	0	0	0	0
VATD	0	0	0	0	0	0	0	0	0	0	0	0	0	0	0	0
VATE1	0	0	0	0	0	0	0	0	0.70473	0.78558	0	0	0	0	0	0
VATH	0	0	0	0	0	0	0	0	0	0	0	0	0	0	0	0
VATL	0.083169	0	0.02548	0.041061	0.018941	0	0	0	1	0.12951	1	1	0.021468	0	0	0
VCIP1	0	0	0	0	0	0	0	0	0	0.11304	0	0	0	0	0	0
VDAC1	0.11623	0.10198	0	0	0	0	0	0	1	1	0	0	0	0	0	0
VDAC2	0	0	0	0	0	0	0	0	0.92834	0.91208	0	0	0.20094	0.19353	0	0
VDAC3	0	0	0	0	0	0	0	0	0	0	0	0	0.39802	0.3944	0	0
VGF	0	0	0	0	0	0	0	0	1	1	1	0.24674	0	0	0	0
VGLU1	0	0	0	0	0	0	0	0	1	1	1	0	0	0	0	0
VIAAT	0	0	0	0	0	0	0	0	0.17482	0	0.033068	0	0	0	0	0
VIME	0	0.090116	0	0	0	0.029325	0	0	0.60459	1	0	0.00094325	0	0	0	0
VP33A	0	0	0	0	0	0	0	0	0	0	0	0	0	0	0	0
VP33B	0	0	0	0	0	0	0	0	0	0	0	0	0	0	0	0
VP9D1	0	0	0	0	0	0	0	0	1	1	1	0.083645	0	0	0	0
VPP1	0.0432	0	0	0	0.060868	0	0	0	1	1	0.75224	0	0.029765	0	0	0
VPS11	0	0	0	0	0	0	0	0	1	1	1	0	0	0	0	0
VPS16	0	0	0	0	0	0	0	0	0	0	0	0	0	0	0	0
VPS18	0	0	0	0	0	0	0	0	0.11494	0.075722	0	0	0	0	0	0
VPS28	0	0	0	0	0	0	0	0	1	1	0.78854	1	0	0	0	0
VPS39	0	0	0	0	0	0	0	0	0	0	0	0	0	0	0	0
VPS45	0.097652	0.12132	0	0	0	0	0	0	0.52928	0.60331	0.11421	0	0	0	0	0
VPS4A	0	0	0	0	0	0	0	0	1	1	1	0.60504	0	0	0	0
VTI1B	0.45544	0.46587	0.38296	0.39046	0	0	0	0	1	1	0.84666	0.90634	0	0	0	0
VTNC	0.42889	0	0	0.073925	0.4998	0	0	0.069037	0	0	0	0	0	0	0	0
VWA8	0.066871	0.044214	0	0	0.028924	0.0013893	0	0	1	1	0	0.37975	0	0	0	0
WASF1	0.013451	0	0	0	0.018907	0	0	0	1	1	0	0	0	0	0	0
WASF3	0	0	0	0	0	0	0	0	0.8454	1	0	0	0	0	0	0
WDR34	0	0	0	0	0	0	0	0.45455	0	0	0	0	0	0	0	0.56463
WDR37	0	0.0012774	0	0	0	0	0	0	0.655	1	0	0	0	0.0073794	0	0
WDR47	0	0	0	0	0	0	0	0	0	0	0	0	0	0	0	0
WDR48	0	0	0	0	0	0	0	0	0.12079	0.090608	0	0	0	0	0	0
WDR7	0	0.01484	0	0	0	0.040338	0	0	1	1	0.073752	0	0	0.029813	0	0
WFS1	0	0	0	0	0	0	0	0	0	0	0	0	0	0	0	0
WNK2	0	0	0	0	0	0	0	0	0	0.081098	0	0	0	0	0	0
X-FOLD-10	0.55513	0.55538	0.51767	0.53264	0.67406	0.67444	0.61963	0.64119	0	0	0	0	0.73749	0.73794	0.67282	0.69832
X-FOLD-100	0	0	0	0	0	0	0	0	0	0	0	0	0	0	0	0
X-FOLD-1000	0	0	0	0	0	0	0	0	0	0	0	0	0	0	0	0
X-FOLD-3	0.26486	0.26498	0.24699	0.25413	0.32161	0.32179	0.29564	0.30593	0.82087	0.82204	0.67052	0.72588	0.35187	0.35209	0.32102	0.33318
XP32	0.17522	0.054566	0.051265	0.62159	0	0	0	0.0091498	0	0	0	0	0	0	0	0.0023464
YBOX1	0	0	0	0	0	0	0	0	1	1	0.62753	0.17523	0	0	0	0
YTDC2	0	0	0	0	0	0	0	0	0.31195	0.22348	0	0	0	0	0	0
Z3H7B	0	0	0	0	0	0	0	0	0.25865	0.19757	0	0	0	0	0	0
ZA2G	0.12148	0	0	0.41354	0.098858	0	0	0.45155	0	0	0	0.076114	0	0	0	0.28202
ZC21A	0	0.23618	0	0	0	0.028981	0	0	1	1	0	0	0	0.12467	0	0
ZDH17	0.028484	0.014368	0	0	0	0	0	0	1	1	1	0.13729	0	0	0	0
ZFY27	0	0	0	0	0	0	0	0	0	0	0	0	0	0	0	0
ZNFX1	0	0	0	0	0	0	0	0	0.25781	0.16943	0	0	0	0	0	0
ZO1	0	0	0	0	0	0	0	0	0.29838	1	0	0	0	0.44598	0	0
ZO2	0	0	0	0	0	0	0	0	0.76332	1	0	0	0.059294	0.21476	0	0

## Sheet: mb_CL-91_PVs
mouse brain, CL-91		Related to Figure 1C
Mark: U = peptide unique to the protein, N = peptide shared by other proteins
Sequence: amino acid sequence of the peptide in single letter code with all isoleucin residues label as leucin, since their masses cannot be
Protein description: UniProtKB Entry Name | Accession number, protein name
Volume: Peakvolumes of peptides identified by MS/MS are shown in bold, peakvolumes identified by MS1 and assigned to peptides based on their m/z and elution time are shown in regular fond.
TUC = affinity purification with a target unrelated control antibody
					sample:	anti-M7a	anti-M7b	anti-M7c	anti-M7d	TUC1	TUC2	TUC3	TUC4
Mark	Sequence	Modifications	m/z	Charge	Mass	Volume	Volume	Volume	Volume	Volume	Volume	Volume	Volume
	SPTN1_MOUSE|P16546	Spectrin alpha chain, non-erythrocytic 1
U	EANQQQQFNR		631.797	2	1261.58	66906.1	37600.1	13918400	25648.1	137910	47075.1	47931.1	1064662
U	LLQEQHPEEELLK		535.954	3	1604.84	292930	182290	101620000	204820	831180	161050	280200	7356308
U	LFGAAEVQR		495.772	2	989.529	194520	112370	54612400	127710	560780	108480	199400	2976615
U	LSELNQK		416.232	2	830.45	60874.1	21047.1	10455400	31325.1	90910.1	37419.1	56690.1	1356723
U	VNEVSQFAAK		546.788	2	1091.56	160900	73134.1	18284600	82621	301700	86944.1	151910	2960308
U	DLAALEDKVK		551.311	2	1100.61	136140	79588.1	42186000	58495.1	489860	76088.1	56467.1	1410046
U	DLAALGDK		401.719	2	801.423	2.28348e+06	1.92495e+06	2950600	4.1302e+06	1.77554e+06	2.42016e+06	4.38935e+06	3461538
U	EAALTNEEVGADLEQVEVLQK		762.388	3	2284.14	1.5929e+07	1.1899e+07	43200000	1.62655e+07	6.8059e+06	1.1858e+07	5.5364e+06	1.10225e+08
U	LVQYLR		396.242	2	790.47	77555.1		23832000	60315.1	268650	48745.1	124340	1312554
U	LGESQTLQQFSR		697.357	2	1392.7		107800	43898000	99792	466630	95376.1	159860	2987231
U	LQVASDENYKDPTNLQGK		674.004	3	2018.99		140640	58318000	131800	556880	115430	143090	4115692
U	LSLLSEER		473.764	2	945.513	146390		44604000	69287.1	367490	73507.1	96685.1	2.682e+06
U	VLETAEDLQER		651.83	2	1301.65	126210		44422000	70620	261210	102170	105170	2522462
U	LQQLFR		402.74	2	803.465	133850		27788000	76332.1	411940	118300	107550	1954769
U	ELPTAFDYVEFTR		794.388	2	1586.76	214520		31260000	85664.1	313260	99588.1	103750	2059846
U	WTQLLANSATR		630.838	2	1259.66	72915.1	37984.1	4769200	36534.1	92491.1	86368.1	58079
U	EELLTNWEQLR		715.867	2	1429.72	64999.1	61817.1	10773000	41837.1	156780		78784.1	716831
U	ALNVQEEK		465.748	2	929.482	109760		25716000	48332.1	226120	60101.1	93648	2224308
U	LDGLTLQAR		493.785	2	985.556	73516.1	34039.1	5779600		154560	32945.1	68014.1	1286262
U	LLEATELK		458.771	2	915.528	89421.1		27582000	37335.1	227590	65370.1		1665077
U	LAQFVEHWK		386.542	3	1156.6	139540	76188.1	35948000		320360	93515.1		2663385
U	AQLADSFHLQQFFR		569.958	3	1706.85	195740	90341.1	43324000		385310	154690		3175231
U	QFQDAGHFDAENLKK	Gln->pyro-Glu	577.609	3	1729.81	271850	155190	69226000	132850	577240		153010	3628154
U	EAFLNTEDKGDSLDSVEALLK		765.385	3	2293.13	282890	156490	80142000		576010		245710	4286000
U	SQLLGSAHEVQR		442.237	3	1323.69	265370		67428000	107430	698510		169570	4.20924e+06
U	LMVHTVATFNSLK		487.603	3	1459.79	99977.1	68369.1	40518000		198830	87673.1		2850462
U	DLSSVQTLLTK		602.843	2	1203.67	127110	108420	38706000		407750	89894.1		2645077
U	ENLLEEQGSLALR		736.391	2	1470.77	167280	87938.1	31822160		323120	75307.1		1956923
U	MQHNLEQQLQAR		499.253	3	1494.74	153830	73684.1	62434000		304660	148680		3314615
U	FLSDFR		392.703	2	783.391			6696600	31930.1	58745.1	28105.1	55671.1	1065892
U	SLQQLAEER		537.283	2	1072.55		109360	62102000	277810	495130		432540	2983538
U	NQALNTDNYGHDLASVQALQR		776.716	3	2327.13	189560	89237.1	32404000		230550	98019.1	114620	2535077
U	GNAMVEEGHFAAEDVK		568.595	3	1702.76	94010.1		4.903e+07		84588.1	72735.1	90049.1	3099692
U	FLADFR		384.706	2	767.397		51048.1	13084000		142480	48522.1	88864.1	1477831
U	DVTGAEALLER		587.309	2	1172.6		49515.1	22148000	60343.1	196170		142180	2.39508e+06
U	ALLNADELANDVAGAEALLDR		1077.56	2	2153.1	1.5781e+06	1.381e+06	37144000		337210	1.2423e+06		2907385
U	ALCAEADRLQQSHPLSASQLQVK	Carbamidomethyl	638.333	4	2549.3	145900	132600	6.376e+07		413370	117900		2452154
U	KFEEFQTDLAAHEER		617.295	3	1848.86	170780	77528.1	21978000		277460	93375.1		3130308
U	KVEDLFLTFAK		437.583	3	1309.73	129430		25984000		271990	105520		1972615
U	SSEELESAFR		577.77	2	1153.53			32058000	71989.1	250860		92051.1	2039385
U	GLVSSDELAK		509.774	2	1017.53	113120	117080	29018000		303800			1796308
U	EKEPLAASTNR		405.882	3	1214.63	79175.1		15168600	23986.1	93865.1			881862
U	HQAFEAEVQANSGALVK		600.308	3	1797.9	122570		20992120	57821.1		73503.1	97686.1	1567538
U	HQALQAELAGHEPR		519.602	3	1555.79	90229.1		13625600		162120	37904.1		689877
U	ALSSEGKPYVTKEELYQNLTR		607.319	4	2425.25	189540		59654000		473340	97351.1		2.97723e+06
U	SSLSSAQADFNQLAELDR		976.471	2	1950.93	181740		37842000		418910	91227.1		1456015
U	FQFFQR		436.724	2	871.434	165130		27134000		412270	84526.1		2.00708e+06
U	LDDSYR		384.68	2	767.345	44940.1		8417800		119060	1.01454e+07	28029.1	797708
U	SWVNEK		381.693	2	761.371	21591.1		4.8646e+06		51117.1		21302.1	434308
U	EELYQNLTR		583.296	2	1164.58			10477200	66458.1	67237		45725.1	732200
U	DADETKEWLEEK		498.232	3	1491.67	112670		15560600		104290		43845.1	1311231
U	DLASVQALLR		543.319	2	1084.62	210480		22246000		360600		176880	2358615
U	EALVTSEELGQDLEHVEVLQK		789.408	3	2365.2	60928.1		11186000		106220		85998.1	1197815
U	DLAALGDKVNSLGETAQR		619.994	3	1856.96		131690	66978000		700230	88957.1		3113692
U	DLTGVQNLR		508.28	2	1014.55		47650.1	28156000		319700	72998.1		2451692
U	HQAFEAELSANQSR		529.922	3	1586.74	118350		37202000		285070		103100	1492092
U	GVLDMGNSLLER	Oxidation	660.335	2	1318.65	45244.1		3016600		89224.1		28042.1	293015
U	ALLNADELANDVAGAEALLDR		718.706	3	2153.1	1.4239e+06		181976000		1299400	506680		16901538
U	SADESGQALLAASHYASDEVR		726.342	3	2176	194520		37874000			113750	140930	3524000
U	VNSLGETAQR		537.781	2	1073.55	25765.1		4830000		40119.1		40803.1	611046
U	LAALADQWQFLVQK		815.951	2	1629.89			89602000	161130	1047100		224930	2291846
U	KFEEFQTDLAAHEER		463.223	4	1848.86	77008.1		5819600		98621.1	55097.1		1272031
U	LDLLDQER		501.267	2	1000.52			704620	89680	95108		137070	648538
U	LTALDEFATK		554.798	2	1107.58		96745.1	34458000	104740			147720
U	TKQDEVNAAWQR		482.576	3	1444.71			27788000		149260	55308.1		974077
U	TATDEAYKDPSNLQGK		579.948	3	1736.82			62336000		287110	101200		2174462
U	DVDELEAWLSEK		717.343	2	1432.67	155530		31830000				126500	1748769
U	GKDLLGVQNLLK		433.266	3	1296.78	113820		27368000			84819.1		1.96062e+06
U	LSDDNTLGQEELQQR		873.419	2	1744.82	80657.1		27264000		200070			1.11259e+06
U	LDETGNLMLSEGHFASETLR		740.692	3	2219.05	122000		33378000		100950			2.53108e+06
U	KQEALVAR		457.774	2	913.534	26949.1		10372400			25085.1		376246
U	LAALQAFADQLLAVDHYAK		686.705	3	2057.09	1.0745e+06		420200000		2978500			19843077
U	QGFVPAAYVK		540.298	2	1078.58	51405.1		11009200		137200			408800
U	TALLELWELRR		700.406	2	1398.8	34245.1		5488200		73228.1			248185
U	GVLDMGNSLLER		652.337	2	1302.66		54257.1	39108000		166340			2812615
U	VNDVCTNGQDLLK	Carbamidomethyl	738.362	2	1474.71	35750.1		8396000		62553.1			486354
U	KLDPAQSASR		536.791	2	1071.57	34546.1		9950600			20361.1		305554
U	FNRDVDETLGWLK		531.607	3	1591.8			22776000		211340	40832.1		657892
U	RAQLADSFHLQQFFR		621.992	3	1862.95			16994000		160950	57011.1		452323
U	TALLELWELRR		467.273	3	1398.8			45232000		452130	108840		2620923
U	YEALKEPMVAR	Oxidation	441.564	3	1321.67	51413.1		3436400				42295.1	231538
U	QGQLDNQTR	Gln->pyro-Glu	521.749	2	1041.48		23786.1	5270800		85605.1			413446
U	QFQDAGHFDAENLK	Gln->pyro-Glu	801.863	2	1601.71	50515.1		11814000		124280			951138
U	HQEHKGELDAHEDSFK		382.179	5	1905.86	116870		18672200		89391.1			842077
U	HALLEADVAAHQDRLDGLTLQAR		629.086	4	2512.31	139660		32369600		176630			1588916
U	LQQSHPLSASQLQVK		555.309	3	1662.91	212770		19443000		168480			1.94385e+06
U	GRELPTAFDYVEFTR		600.969	3	1799.88	101830		16432000		86047.1			597231
U	SQLLGSAHEVQR		662.852	2	1323.69	40686.1		13971400		93924.1			417169
U	LEAELAAHEPALQGVLDTGKK		548.3	4	2189.17			7622800		95249.1		48032.1	747569
U	LLDVNHYAK		536.793	2	1071.57			5353600	20370.1	53235.1			453369
U	LLQNNHYAMEDVATRR		483.494	4	1929.95			48264000		100540	161790		2087538
U	DVEDEETWLR		646.294	2	1290.57	119840		18989400			88530.1		1964154
U	LEAELAAHEPALQGVLDTGK		688.032	3	2061.07			4598600		121120		61420.1	371938
U	QEFAQHANAFHQWLQETR	Gln->pyro-Glu	742.015	3	2223.02	47422.1		17363800		157800			2048154
U	LREANQQQQFNR		511.262	3	1530.77	39061.1		17132600		119330			355369
U	ELELQKEQR		391.547	3	1171.62			3514400		56651.1	797190		44920.1
U	KHQALQAELAGHEPR		421.977	4	1683.88	72739.1	47018.1	17080000
U	RNEVLDR		451.246	2	900.478	37528.1		6660400					330477
U	NVEDLELWLYEVEGHLASDDYGKDLTNVQNLQK		962.722	4	3846.86	274460		60380000	110190				2.48339e+06
U	LLVSSEDYGR		569.791	2	1137.57			21234000		265830			1633231
U	LLQSHPESAEDLKEK		575.3	3	1722.88			14779200		84952.1			764492
U	KVEDLFLTFAK		655.871	2	1309.73			28200000		329840			1009323
U	RLEAELAAHEPALQGVLDTGK		740.066	3	2217.18			5194200		78599.1			202369
U	KLSDDNTLGQEELQQR		625.313	3	1872.92			22846000		116670			1083708
U	KHEAFETDFTVHK		397.949	4	1587.77	112250		14506400		124890
U	DLTNVQNLQK		586.817	2	1171.62	52662.1		9307800					676000
U	ALSSEGKPYVTK		427.235	3	1278.68			3775400				22567.1	356815
U	LDENSAFLQFNWK		806.394	2	1610.77	80577.1		18478800					755431
U	MQHNLEQQLQAR	Oxidation	504.584	3	1510.73			9839800		55224.1			565523
U	LAALADQWQFLVQK		544.303	3	1629.89			18582000		230230			1196292
U	MQHNLEQQLQAR		748.375	2	1494.74			4002600		21089.1			164031
U	NEVLDR		373.196	2	744.377			1890380		33783.1			278923
U	QWELLLEK		529.798	2	1057.58			4140000		79434.1			310800
U	DMDDEESWLKEK		508.889	3	1523.64			1.03232e+07		32802.1			625692
U	LLQEQHPEEELLK		803.428	2	1604.84			7110600		48530.1			406262
U	QDEVNAAWQR	Gln->pyro-Glu	600.276	2	1198.54			4.1706e+06		41674.1			248985
U	LLQSHPESAEDLKEK		431.727	4	1722.88			66566000		453670			4462462
U	REELLTNWEQLR		529.614	3	1585.82			30964000		319370			2390615
U	SSLSSAQADFNQLAELDR		651.317	3	1950.93			19485000		220860			1503062
U	RAQLADSFHLQQFFR		466.746	4	1862.95			4583800		65736.1			313677
U	DAEELEKWLQEK		506.588	3	1516.74			13856400		162240			374692
U	DAEELEKWLQEK		759.378	2	1516.74			10171000		113850			163708
U	LLDVNHYAKEEVAAR		432.732	4	1726.9			20072000		190160			255538
U	LDENSAFLQFNWK		537.932	3	1610.77			4335000		45292.1			475538
U	VNDVCTNGQDLLKK	Carbamidomethyl	535.275	3	1602.8	39569.1		15854800					482108
U	DLLGVQNLLK		556.837	2	1111.66			4810200		74854.1			528385
U	ALSSEGKPYVTKEELYQNLTR		809.424	3	2425.25			9418400		62180.1			445077
U	LSDDNTLGQEELQQR		582.615	3	1744.82	77529.1				198640			1305892
U	LMVHTVATFNSLK	Oxidation	492.934	3	1475.78	74027.1		5958200					391092
U	MMLDHCLELQLFHR	Carbamidomethyl	461.476	4	1841.87			9859600		32886.1			925585
U	ENLLEEQGSLALR		491.263	3	1470.77			5314600		55634.1			617615
U	QKLEDSYR	Gln->pyro-Glu	511.251	2	1020.49	102710				297870			1225892
U	DLASVNNLLK		543.811	2	1085.61			3465200		62927.1			528400
U	ALCAEADR	Carbamidomethyl	453.211	2	904.407	33957.1		3536600					418985
U	HQAFEAELSANQSR		794.379	2	1586.74			3046000				50097.1	140585
U	VLETAEDLQERR		486.923	3	1457.75			28088000	34222.1				493508
U	QETFDAGLQAFQQEGLANLTALKDQLLAAK		1078.23	3	3231.68			49520000		151490			1.31563e+06
U	EKEQLMASDDFGR		509.237	3	1524.69	42713.1		10533200					1370969
U	QEENDKLR	Gln->pyro-Glu	507.746	2	1013.48			857440			6331.1		132131
U	QFQDAGHFDAENLK		540.586	3	1618.74			3.93e+06		60003.1			242031
U	DQLLAAK		379.724	2	757.433			1639860				15903.1	389231
U	SADESGQALLAASHYASDEVREK		609.292	4	2433.14			39454000	32972.1	210730			253754
U	EAGSVSLR		409.722	2	817.429	68111.1				103220	21552.1
U	EKLDLLDQER		420.226	3	1257.66			8550200				60956.1	1237154
U	LEDSYR		391.688	2	781.361			1240260					103666
U	LKGLALQR		449.795	2	897.576			3985600		37911.1
U	LDPAQSASR		472.743	2	943.472			1282520					109165
U	LKAQMLEK		480.781	2	959.547			1127720					58603.1
U	QWELLLEK	Gln->pyro-Glu	521.284	2	1040.55			28084000					1.47945e+06
U	ERELELQK		522.788	2	1043.56			2241600					83031.1
U	KLLEATELK		522.819	2	1043.62			18939200		171180
U	LLEAQSHFR		550.796	2	1099.58			6463400					277323
U	MNEVLSLWK		560.297	2	1118.58			21164000					1855385
U	LAQFVEHWK		579.309	2	1156.6			6921200		58034.1
U	DVDETLGWLK		588.301	2	1174.59		77140.1	13366800
U	EKEPLAASTNR	Glu->pyro-Glu	399.879	3	1196.61			566520					37605.1
U	DLMSWLNGLR		602.811	2	1203.61			10705400					1540000
U	DLTSWVTEMK		605.295	2	1208.57			8017600					1245985
U	QDEVNAAWQR		608.789	2	1215.56			2796200					109268
U	KLLEAQSHFR		410.231	3	1227.67			6976400					358154
U	ADVVESWLGEK		616.811	2	1231.61			5920400					1010231
U	AKLGDSHDLQR		413.886	3	1238.64			2693600			121600
U	EKLDLLDQER		629.835	2	1257.66			3514400					249338
U	KLLVSSEDYGR		633.838	2	1265.66			2933400					205723
U	DMDDEESWLK		634.261	2	1266.51			6747400					682554
U	KLLVSSEDYGR		422.894	3	1265.66			13035400		80225.1
U	GKDLLGVQNLLK		649.396	2	1296.78			9665200		131890
U	YEALKEPMVAR		436.232	3	1305.67			41934000					2.25723e+06
U	DTEQVDNWMSK		676.793	2	1351.57			6848600					855723
U	DTEQVDNWMSK	Oxidation	684.79	2	1367.57			1206580					128592
U	KNNHHEENLSSK		479.567	3	1435.68			969180					42928
U	DSDELKSWVNEK		725.346	2	1448.68			7690000		75691.1
U	LSELNQKWEALK		486.937	3	1457.79			20554000		217080
U	DSDELKSWVNEK		483.9	3	1448.68			14217000					380200
U	EANELQQWLTEK		744.87	2	1487.73			18984200					2.05123e+06
U	DADETKEWLEEK		746.844	2	1491.67			2981000					197092
U	LREANQQQQFNR		766.39	2	1530.77			1019060		91386.1
U	HQLLEADLSAHEDR		545.269	3	1632.79			8208200					1025031
U	LLQSHPESAEDLKEK		862.447	2	1722.88			1980480					150600
U	LLDVNHYAKEEVAAR		576.641	3	1726.9			4873800					51103.1
U	QVEELYQSLLELGEK	Gln->pyro-Glu	880.951	2	1759.89			57098000					4216308
U	KHQLLEADLSAHEDR		441.227	4	1760.88			7990400					894292
U	LLQNNHYAMEDVATR		592.29	3	1773.85			10069400					1106662
U	ADVVESWLGEKENSLK		902.46	2	1802.9			3420400					115622
U	AKLDENSAFLQFNWK		604.309	3	1809.9			12860200		95259.1
U	MMLDHCLELQLFHR	Carbamidomethyl	614.965	3	1841.87			6907000					297662
U	LLQNNHYAMEDVATRR		644.323	3	1929.95			6506000					403554
U	FLSDFRDLMSWLNGLR		657.337	3	1968.99			8653600					888369
U	LQQLFRDVEDEETWLR		693.016	3	2076.03			8629400		73737.1
U	LLVSSEDYGRDLTGVQNLR		712.375	3	2134.1			19069000					416169
U	GLVSSDELAKDVTGAEALLER		725.05	3	2172.13			168340000					4710154
U	KHEALMSDLSAYGSSLQALR		545.031	4	2176.09			26956000					1345692
U	MTLVASEDYGDTLAALQGLLK		1105.07	2	2208.13			67244000					4057692
U	MTLVASEDYGDTLAALQGLLK		737.052	3	2208.13			135428000					9000308
U	LDETGNLMLSEGHFASETLR	Oxidation	746.023	3	2235.05			6673200					463723
U	DLNSQADSLMTSSAFDTSQVK		749.014	3	2244.02			4312800					578708
U	QEAFLLNEDLGDSLDSVEALLK		807.079	3	2418.22			34070000					1.41323e+06
U	QETFDAGLQAFQQEGLANLTALK	Gln->pyro-Glu	826.083	3	2475.23			13335000					1.93139e+06
U	ALCAEADRLQQSHPLSASQLQVK	Carbamidomethyl	850.775	3	2549.3			9989200					314185
U	YTEHSTVGLAQQWDQLDQLGMR		859.411	3	2575.21			13941800					1730308
U	TYLLDGSCMVEESGTLESQLEATK	Carbamidomethyl	887.747	3	2660.22			31512000					1520092
U	QQVAPMDDETGKELVLALYDYQEK	Gln->pyro-Glu	922.777	3	2765.31			64868000					3.47969e+06
U	TYLLDGSCMVEESGTLESQLEATKR	Carbamidomethyl	939.781	3	2816.32			17889500					630077
U	AGTFQAFEQFGQQLLAHGHYASPELK		719.609	4	2874.41			314020000					14331077
U	RQDLEDSLQAQQYFADANEAESWMR		1001.12	3	3000.33			69118000					1502892
U	QETFDAGLQAFQQEGLANLTALKDQLLAAK	Gln->pyro-Glu	1072.56	3	3214.65			168832000					2095231
U	ECEDVMDWLNDKEALVTSEELGQDLEHVEVLQK	Carbamidomethyl	975.959	4	3899.81			45200000					1.22789e+06
U	FDDFQK		400.185	2	798.355			1.72222e+06					180615
U	EFSMMFK		460.206	2	918.398			1.02688e+06					171554
U	CNSLEELK	Propionamide	503.747	2	1005.48			3.552e+06					245954
U	DLTGVQNLRK		381.888	3	1142.64					52385.1			264492
U	GELDAHEDSFK		416.523	3	1246.55			2.4642e+06					354523
U	YEALKEPMVAR		653.845	2	1305.67			3.9972e+06					192092
U	GNAMVEEGHFAAEDVK		852.388	2	1702.76			3.456e+06					207538
U	FEEFQTDLAAHEER		574.597	3	1720.77			1.68226e+06		50211.1			493338
U	QEAFLLNEDLGDSLDSVEALLK	Gln->pyro-Glu	801.404	3	2401.19			6.8654e+07					1597692
U	LMELHR		399.718	2	797.422			3879000
U	KFMLFR		421.241	2	840.468			2595600
U	RQQVLDR		457.762	2	913.509			2063200
U	EPLAASTNR		479.751	2	957.488								94349.1
U	LGDSHDLQR		520.76	2	1039.5								224262
U	GACAGSEDAVK	Carbamidomethyl	532.737	2	1063.46								167000
U	EKEPLAASTNR		608.32	2	1214.63			1583900
U	TKQDEVNAAWQR		723.36	2	1444.71			3491000
U	VLETAEDLQERR		729.881	2	1457.75			2228600
U	DCEQAENWMAAR	Carbamidomethyl	740.801	2	1479.59			6923000
U	REELLTNWEQLR		793.918	2	1585.82			4291000
U	HQAFEAELHANADR		536.922	3	1607.74			52338000
U	SKLGESQTLQQFSR		536.95	3	1607.83			15814200
U	KHALLEADVAAHQDR		419.223	4	1672.86			1978480
U	AQLADSFHLQQFFR		854.434	2	1706.85			231560000
U	QFQDAGHFDAENLKK	Gln->pyro-Glu	865.91	2	1729.81			2583000
U	TATDEAYKDPSNLQGK		869.418	2	1736.82			3882600
U	LLQNNHYAMEDVATR	Oxidation	597.621	3	1789.84			2042000
U	ADVVESWLGEKENSLK		601.976	3	1802.9								1.15785e+06
U	ETENVKSSEELESAFR		618.962	3	1853.86			2443400
U	DLAALGDKVNSLGETAQR		929.487	2	1856.96			6103600
U	HQAFEAELHANADRLR		470.24	4	1876.93			2771600
U	HQEHKGELDAHEDSFK		477.472	4	1905.86			9083800
U	HQEHKGELDAHEDSFK		636.294	3	1905.86			1392380
U	QVEELYQSLLELGEKR	Gln->pyro-Glu	959.002	2	1915.99			19177600
U	FLADFRDLTSWVTEMK		653.661	3	1957.96			74792000
U	KLEDLGAAMEEALLLDNK		658.347	3	1972.02								4172000
U	MKQVEELYQSLLELGEK		679.691	3	2036.05			29402000
U	HEALMSDLSAYGSSLQALR		683.674	3	2048			2843600
U	KHEALMSDLSAYGSSLQALR		726.372	3	2176.09			6998800
U	VASNPYTWFTMEALEETWR		1166.04	2	2330.07			9518400
U	QEAFLLNEDLGDSLDSVEALLK	Gln->pyro-Glu	1201.6	2	2401.19			38054000
U	SADESGQALLAASHYASDEVREK		812.054	3	2433.14			5841400
U	HALLEADVAAHQDRLDGLTLQAR		838.445	3	2512.31			2051000
U	NVEDLELWLYEVEGHLASDDYGK		898.757	3	2693.25			15105000
U	QQVAPMDDETGKELVLALYDYQEK		928.453	3	2782.34			27304000
U	LEESLEYQQFVANVEEEEAWLNEK		976.126	3	2925.36			112154000
U	AGTFQAFEQFGQQLLAHGHYASPELKEK		627.317	5	3131.55			23548000
U	QETFDAGLQAFQQEGLANLTALKDQLLAAK		808.927	4	3231.68			36634000
U	TALLELWELR		622.356	2	1242.7								2295692
U	NNHHEENLSSK		436.869	3	1307.59								130395
U	LMVHTVATFNSLK		730.9	2	1459.79								190446
U	LKDLNSQADSLMTSSAFDTSQVK		829.407	3	2485.2								1017631
U	EKLTVLSEER		401.891	3	1202.65								141492
U	HEDFDKALNVQEEK		567.941	3	1700.8
U	NTTGVTEEALKEFSMMFK		688.332	3	2061.97
U	EQLMASDDFGRDLASVQALLR		779.062	3	2334.16
U	HQLLEADLSAHEDRLK		469.498	4	1873.96
U	QQNFNTGLK	Gln->pyro-Glu	516.759	2	1031.5
U	EALVTSEELGQDLEHVEVLQK		592.308	4	2365.2
U	ELELQK		380.216	2	758.417
	TRPM7_MOUSE|Q923J1	Transient receptor potential cation channel subfamily M member 7
N	LLTYELK		440.263	2	878.511	17780000	6972800	17106200	1662300	40233.1
U	GEPVTVYR		460.745	2	919.476	14155000	5013900	7227600	1542100	531140
U	QTEEGGNLPDAAEPDLLSTLKK	Gln->pyro-Glu	770.388	3	2308.14	8851400	3251500	7096000	913310
U	EFNLPEAGSSCGALFPSAVSPPELR	Carbamidomethyl	878.095	3	2631.26	8869100	3175200	7.1164e+06	750040
U	VEQMSLQLK		538.294	2	1074.57	11655000	4.7531e+06	13564200	1285900
U	MDASMEEGK		499.202	2	996.389	419300	159220	495440	25186.1
U	SGHLYLLK		465.774	2	929.533	3827600	1432300	3270800	422320
N	NWSNSTCLK	Carbamidomethyl	555.256	2	1108.5	5577500	2018600	4.7076e+06	547420
U	TKDELVDLDDPETK		539.933	3	1616.78	21370000	7842400	15568800	2158400
U	CLPGCQLCQQLVR	Carbamidomethyl+Carbamidomethyl+Carbamidomethyl	816.394	2	1630.77	4100500	1370900	2964600	235180
U	ALLYPHEEPSWSLAK		580.97	3	1739.89	20609000	7271600	12603200	1907200
U	AAVTTGAWLLTGGVNTGVAK		629.683	3	1886.03	15812000	5792700	1.0325e+07	1877011
U	LLYNSLGGNNR		610.823	2	1219.63	14297000	4886300	10710800	1572700
U	TSTSLHSVQAESCSR	Carbamidomethyl	825.381	2	1648.75	544900	175180	410340	46314.1
U	LSQSLPFVPVPPR		718.917	2	1435.82	2368600	806800	1.22102e+06	272800
U	AAEGDNLEFGAFVGHR		845.403	2	1688.79	2633600	826700	1.27458e+06	203830
U	KLCTLGLAPWGVLENR	Carbamidomethyl	609.67	3	1825.99	13117000	4708600	10247400	795140
U	HTEQSPTDAYGVLNFQGGSHSYR		638.545	4	2550.15	15670000	5884900	12142600	1182500
U	DSMDLQR		432.698	2	863.381	1910200	742340	2072800	139560
U	EWQMELPK		530.76	2	1059.51	5217400	2184100	5731400	637470
U	LFLTEEDQKK		417.559	3	1249.66	5141800	1.601e+06	4707800	417010
U	QTEEGGNLPDAAEPDLLSTLKK		776.064	3	2325.17	5636800	1774100	5261600	481720
U	FLTLPR		373.732	2	745.449	19431000	7884200	15072200	2611000
U	DVVAPYQTLLNPLSK		553.31	3	1656.91	5937800	2546700	3747400	768660
U	DVVAPYQTLLNPLSK		829.462	2	1656.91	22169000	8826900	13552600	2.3117e+06		199420
U	ECVYLLPSSK	Carbamidomethyl	598.305	2	1194.6	9477500	3414900	6192800	783440
U	ELLSNDTPENTLK		737.375	2	1472.74	23147000	8469900	15520600	2525800
U	HVGAAGYSECCK	Carbamidomethyl+Carbamidomethyl	446.857	3	1337.55	5405200	1838100	5961000	249260
U	QTEEGGNLPDAAEPDLLSTLKK	Gln->pyro-Glu	1155.08	2	2308.14	2.3396e+06	790740	2.5252e+06	163840
U	TSTSLHSVQAESCSR	Carbamidomethyl	550.59	3	1648.75	14873000	4433900	14151000	1210700
U	VEQMSLQLK	Oxidation	546.292	2	1090.57	3433800	1451800	3.5246e+06	681500
U	LRELLSNDTPENTLK		871.968	2	1741.92	530240	198610	555160	54065.1
U	LGSSPNSSPHMSSPPTK		570.942	3	1709.8	3664000	1398400	5622000	281850
U	LTFAFNQMKPK		662.858	2	1323.7	914130	350840	1.4144e+06	106050
U	SHLESTTKDQEPLFYK		641.655	3	1921.94	6768400	2025800	10641000	331990
U	LRELLSNDTPENTLK		581.648	3	1741.92	6375800	2633400	6153400	638640
U	LFLTEEDQK		561.787	2	1121.56	25757000	10110000	2.4522e+07	2754400
U	LLLENGVSMHK		414.229	3	1239.66	6188900	2423900	7059000	658940
U	TKDELVDLDDPETK		809.396	2	1616.78	2463800	805320	1921400	215130
U	FSVSTPSQPSCK	Carbamidomethyl	662.814	2	1323.61	9660000	3678400	12976200	920280
U	LTFAFNQMKPK		442.241	3	1323.7	6153400	2508700	8460200	746240
U	AAVTTGAWLLTGGVNTGVAK		944.02	2	1886.03	9568530	3126700	5443000	842140
U	SWLESTLTK		532.785	2	1063.56	11787000	3583600	6774200	1048400
U	ALSNLVWK		465.774	2	929.533	12583000	4329000	8658000	1191100
U	LNVLNNLHSHFLLVDDGTVGK		577.063	4	2304.22	37211700	13373050	22572000	2308400
U	LSQSLPFVPVPPRGEPVTVYR		780.102	3	2337.28	2900400	1.0459e+06	2.4488e+06	240250
U	LGEHFNQALEEWSVEK		639.311	3	1914.91	24607000	5003000	15606800	1407500
U	LFLTEEDQKK		625.835	2	1249.66	776360	248720	551000	136240
U	QGPTNPMLFHLLR		508.61	3	1522.81	4309200	1724600	3970200	392360
U	LSYDTKPELLLQLLLK		629.712	3	1886.11	104026010	5526000	95180000	9068600
U	QHACFTASLAMK	Carbamidomethyl+Gln->pyro-Glu	674.313	2	1346.61	2586300	56444	2.4078e+06	254140
U	FYAFYHAPLVK		452.576	3	1354.71	6830300	1603400	5194200	577330
U	LEESSPSLLNNSMSSWSQLGLCAK	Carbamidomethyl+Oxidation	885.419	3	2653.24	1663200	570830	1.36808e+06	332070
U	KFYAFYHAPLVK		495.275	3	1482.8	4029100	1158900	4282800	254810
U	HGVEMLK		407.218	2	812.421	4877400	2339100	6288200	425360
U	NTSSSTPQLRK		406.886	3	1217.64	990280	463860	1359600	58990.1
U	AADLLAYLHK		557.816	2	1113.62	8863900	3201100	6.5076e+06	956350
U	AALLPDWLR		527.806	2	1053.6	21546106	8112900	11885600	1987500
U	AAEGDNLEFGAFVGHR		563.938	3	1688.79	44839930	18084000	26168000	3802100
U	LSQSLPFVPVPPR		479.614	3	1435.82	491170	191210	420020	102830
U	HTEQSPTDAYGVLNFQGGSHSYR		851.058	3	2550.15	8733400	3333900	6387600	612460
U	NTSSSTPQLR		545.778	2	1089.54	12392000	4552200	5849000	1306500
U	KPSAVNTLSSSLPQGDR		586.311	3	1755.91	13022000	4.2855e+06	5593600	1384900
U	LVLSVHGGMQK		390.222	3	1167.64	6990600	3944000	9455200	705830
U	FLWQHGEESMAK	Oxidation	493.563	3	1477.67	2284700	728920	2.0584e+06	569140
U	SCDMVFGPANLGEDALK	Carbamidomethyl+Oxidation	920.416	2	1838.82	996170	373000	897340	246760
U	VLCTWSEHDLLK	Carbamidomethyl	500.922	3	1499.74	23436000	8.4206e+06	1.57802e+07	1504400
U	LLDSSDGKNEMELHLK		457.983	4	1827.9	14547000	7024600	16765600	1482500
U	EVFMSEAGK		499.237	2	996.459	4060800	1011500	4710800	386370
U	SCDMVFGPANLGEDALK	Carbamidomethyl	912.419	2	1822.82	3.847e+06	1257000	4857000	464940
U	LKQLLGK		400.274	2	798.533	826040	389890	846080	84198
U	EWQMELPK	Oxidation	538.758	2	1075.5	1403500	625150	938580	508020
U	LLFPQDESSDLNLQSGNSTK		731.694	3	2192.06	4918300	1443000	2.9394e+06	373120
U	LLLENGVSMHK	Oxidation	419.56	3	1255.66	1386800	440520	1.07588e+06	420940
U	LSYDTKPELLLQLLLK		944.064	2	1886.11	11111000	683070	9.2114e+06	779090
U	QSDLVDDTSEELK		739.846	2	1477.68	2294000	990020	1.06384e+06	188830
U	LGSSPNSSPHMSSPPTK	Phospho	597.597	3	1789.77	497850	172680	1.01894e+06	54787.1
U	RSCDMVFGPANLGEDALK	Carbamidomethyl	660.649	3	1978.92	413730	183780	1.193e+06	78362.1
U	QTEEGGNLPDAAEPDLLSTLK	Gln->pyro-Glu	727.69	3	2180.05	2814000	1054200	1.34624e+06	680630
U	VLLSLLVPPALLMLEYK	Oxidation	643.39	3	1927.15	2919600	167880	3.8456e+06	901580
U	HVGAAGYSECCK	Carbamidomethyl+Carbamidomethyl	669.782	2	1337.55	1507000		1429920	78013
U	FELHPR		399.716	2	797.418	3956900	1540800		512790
U	AADLLAYLHK		372.213	3	1113.62	28464000	11500000	19255200
U	QTEEGGNLPDAAEPDLLSTLK	Gln->pyro-Glu	1091.03	2	2180.05	1971400	684540	1.26898e+06
U	KALLYPHEEPSWSLAK		623.668	3	1867.98	8409600	3330400	5294400
U	TLTAQKASEASK	Phospho	657.819	2	1313.62	1563600	501120	1213640
U	ASTEDSPEVDSK		632.781	2	1263.55	1051600	384040	650620
U	LTFAFNQMKPK	Oxidation	447.573	3	1339.7	4009800	1528100	3.645e+06
U	EVFMSEAGK	Oxidation	507.234	2	1012.45	1493200	522660		273650
U	DEKDPQYNLFGQDLPVLPQR		791.401	3	2371.18	5095300	1477900		541220
U	FLWQHGEESMAK		731.843	2	1461.67	909890	350780	997800
U	SWLESTLTKR		407.559	3	1219.66	3325600	1315500	3.6374e+06
U	LEELYNTK		505.264	2	1008.51	37450000	13273000		4237600		89032.1
U	QSDLVDDTSEELK	Gln->pyro-Glu	731.333	2	1460.65	3679500	1247200		348320
U	KPSAVNTLSSSLPQGDR		878.963	2	1755.91	610190	176790		63151
U	CLPGCQLCQQLVR	Carbamidomethyl+Carbamidomethyl+Carbamidomethyl	544.599	3	1630.77	726490	273160		57958.1
U	RSLQSLDSQLGHLQDLSALTVDTLK		685.373	4	2737.46	2470800	903900		153300
U	LLDSSDGKNEMELHLK	Oxidation	461.982	4	1843.9	3.024e+06		3151600	710800
U	EEMGGGLR		424.7	2	847.386	944710	359740		61456
U	LNVLNNLHSHFLLVDDGTVGK		769.081	3	2304.22	10156000	3155000	7.9084e+06
U	DDKFNSGSEER		428.521	3	1282.54	576550	163740	432820
U	ECVYLLPSSKDPHR	Carbamidomethyl	567.619	3	1699.84	1950200	784530	1876960
U	DQEPLFYK		520.258	2	1038.5	11853000		8145600	1226700
U	LLDSSDGKNEMELHLK	Oxidation	615.64	3	1843.9	634450	303900		150180
U	SWLESTLTKR		610.835	2	1219.66	2128700	727160	2069200
U	NTSSSTPQLRK		609.825	2	1217.64	128880	73001.1	126764
U	SLQSLDSQLGHLQDLSALTVDTLK		861.461	3	2581.36	139300000	52847000		10455000
U	SMAYEAK		400.186	2	798.358	349770	153830		51095.1
U	SHLESTTKDQEPLFYK		481.493	4	1921.94	3655500	1186700	5702600
U	LVLSVHGGMQK		584.829	2	1167.64	2058700	789600	1535640
U	GTNASAFDQLLLTLAWDRVDLAK		840.115	3	2517.32	43252240		30188000	2178300
U	QGPTNPMLFHLLR	Gln->pyro-Glu+Oxidation	761.895	2	1521.78	2120200	908140	1.70686e+06
U	LCTLGLAPWGVLENR	Carbamidomethyl	566.971	3	1697.89	1739000	523540		124150
U	KPSAVNTLSSSLPQGDR	Phospho	612.967	3	1835.88	806140	261750		87982.1
U	FSVSTPSQPSCK	Carbamidomethyl+Phospho	702.797	2	1403.58	603140	204170	733220
U	GELLVLDLQGVGENLTDPSVLK		770.425	3	2308.25	39827860		37456000	3798500
U	HVGDALKEHASR		440.565	3	1318.67	1397100	759560	2299400
U	NDLVGRDVVAPYQTLLNPLSK		771.425	3	2311.25	1416500	568640	2.5884e+06
U	LGSSPNSSPHMSSPPTK	Oxidation	576.274	3	1725.8	864700	340260	855980
U	NDYTPDKLLFPQDESSDLNLQSGNSTK		1009.48	3	3025.42	2542700	903070	2.5284e+06
U	LVLSVHGGMQK	Oxidation	395.553	3	1183.64		1.7482e+06	2471400	648240
U	VNYLKR		396.74	2	791.465	420290	109760	465326
U	MDASMEEGKK		375.835	3	1124.48	746430	389030	1564260
U	ECVYLLPSSKDPHR	Carbamidomethyl	425.966	4	1699.84	1402600	847490	2.7268e+06
U	LSQSLPFVPVPPRGEPVTVYR	Phospho	806.758	3	2417.25	668100	355070		129430
U	LEESSPSLLNNSMSSWSQLGLCAK	Carbamidomethyl	880.088	3	2637.24	11951000	5650900		1213500
U	MDASMEEGKK		563.249	2	1124.48	139800	45752.1	264460
U	VLCTWSEHDLLK	Carbamidomethyl	750.879	2	1499.74	2608400		1973380	146740
U	EDTVLHLCLR	Carbamidomethyl	628.327	2	1254.64	854440	282370	792260
U	SFLPEVLNTWSSLYK		892.467	2	1782.92	7917100		2.7248e+06	234430
U	RASTEDSPEVDSK	Phospho	750.814	2	1499.61	1170400		758360	74642.1
U	TAQPYRPK		480.767	2	959.519	257310	167370	217700
N	NWSNSTCLK	Propionamide	562.264	2	1122.51	803160	280040	604920
U	TLTAQKASEASK	Phospho	438.882	3	1313.62	930830	292970	627580
U	QHACFTASLAMK	Carbamidomethyl	455.553	3	1363.64	519550	220280	1.04002e+06
U	QGPTNPMLFHLLR	Gln->pyro-Glu	753.898	2	1505.78	11243000		12620600	1466900
U	RASTEDSPEVDSK		474.223	3	1419.65	673110	174450	566320
U	LLLENGVSMHK		620.84	2	1239.66	1051000	490130	1.50806e+06
U	KNSWYK		413.216	2	824.418	1419900	567400	754380
U	DELVDLDDPETK		694.825	2	1387.64	1545800	544220	871020
U	HLAQNLLDDVPVRPLWK		504.286	4	2013.12	5.4152e+06	2396900	3.4768e+06
U	HLAQNLLDDVPVRPLWK		672.046	3	2013.12	23122000		14363200	593730
N	HVGDALK		370.208	2	738.402	300080		164344	81676
U	EVGDRVNYLK		398.216	3	1191.62	4830300	2.1073e+06	6.2188e+06
U	SCDMVFGPANLGEDALK	Carbamidomethyl	608.615	3	1822.82	1117200	453950	1.39884e+06
U	SLQSLDSQLGHLQDLSALTVDTLK		646.347	4	2581.36	13728000	5176800	1.5319e+07
U	ALLYPHEEPSWSLAK		870.951	2	1739.89	1449000	498860	608600
U	FLWQHGEESMAK		488.231	3	1461.67	8784900	4.0254e+06	8.435e+06
U	WNYLNAYDNHVFVAGR		646.98	3	1937.92	2221800	673350	2.0266e+06
U	VREVFMSEAGK		626.821	2	1251.63	332340	90609.1	607380
U	LLFPQDESSDLNLQSGNSTK		1097.04	2	2192.06	1.3592e+06	451660		173800
U	LLYNSLGGNNRR		459.585	3	1375.73	9189300	4.0533e+06	7.0336e+06
U	VLLSLLVPPALLMLEYK		638.058	3	1911.15	5493200		7038400	331540
U	VLLSLLVPPALLMLEYK	Oxidation	964.581	2	1927.15	1755500		3.409e+06	485340
U	LLDFLAVNQQAGPYVMMLGK		736.723	3	2207.15	5482600		1.00496e+07	632080
U	EFNLPEAGSSCGALFPSAVSPPELR	Carbamidomethyl+Phospho	904.751	3	2711.23	16095000	5214900	1.32604e+07
U	KLCTLGLAPWGVLENR	Carbamidomethyl	914.001	2	1825.99	991630	363700	1.43516e+06
U	RASTEDSPEVDSK	Phospho	500.879	3	1499.61	831720		460680
U	LLDSSDGKNEMELHLK		610.308	3	1827.9	3842100	1.6853e+06
U	QYSNDFGQLAVELLEQSFR	Gln->pyro-Glu	1114.04	2	2226.06	5208500			281660
U	GELLVLDLQGVGENLTDPSVLK		1155.13	2	2308.25	24034000		20118000
U	LPDLKR		371.234	2	740.454	374410		977600
U	HGVEMLK	Oxidation	415.215	2	828.416	232930	86901
U	NEMELHLK		507.258	2	1012.5	244330	117710
U	EVGDRVNYLK	Glu->pyro-Glu	392.212	3	1173.61	479110	169880
U	LVLSVHGGMQK	Oxidation	592.826	2	1183.64	1661200	724590
U	EDTVLHLCLR	Carbamidomethyl	419.22	3	1254.64	3502300	1.2007e+06
U	LLLENGVSMHK	Oxidation	628.837	2	1255.66	275810			54557.1
U	VREVFMSEAGK	Oxidation	423.548	3	1267.62	1071100			284620
U	HVGDALKEHASR		660.344	2	1318.67	155730	98705.1
U	FYAFYHAPLVK		678.361	2	1354.71	654610		538240
U	QHACFTASLAMK	Carbamidomethyl+Gln->pyro-Glu+Oxidation	682.31	2	1362.61	907970			294140
U	KFYAFYHAPLVK		371.708	4	1482.8	1342700	447490
U	LSQSLPFVPVPPR	Phospho	758.9	2	1515.79	639930			94334.1
U	LEFLSKEEMGGGLR	Oxidation	527.936	3	1580.79	639430			111910
U	QGPTNPMLFHLLR	Oxidation	513.942	3	1538.8	816500	313940
U	ELLSNDTPENTLK	Phospho	777.358	2	1552.7	723250	312060
U	LEFLSKEEMGGGLR		783.403	2	1564.79	190800	87401.1
U	ESNNPFLCNLFMK	Carbamidomethyl	807.376	2	1612.74	1921400			364960
U	TSTSLHSVQAESCSR	Carbamidomethyl+Phospho	865.364	2	1728.71	274040	78292.1
U	SFLPEVLNTWSSLYK		595.314	3	1782.92	4501600			446120
U	LGEHFNQALEEWSVEK		958.463	2	1914.91	2325000	413820
U	GTNASAFDQLLLTLAWDR		664.678	3	1991.01	13245200			948050
U	GTNASAFDQLLLTLAWDR		996.513	2	1991.01	8363110			545180
U	LTLLDLGLVLEYLMGGTYR	Oxidation	719.394	3	2155.16	532150			96701.1
U	QTEEGGNLPDAAEPDLLSTLK		1099.54	2	2197.07	853510	304440
U	QYSNDFGQLAVELLEQSFR		748.703	3	2243.09			2.085e+06	384570
U	TFNFGQSEAVHLFQTMMECMK	Carbamidomethyl	846.042	3	2535.11	9625800			440990
U	KEFNLPEAGSSCGALFPSAVSPPELR	Carbamidomethyl+Phospho	947.449	3	2839.33	376930	171930
U	ELLTVFHLGSEDHQDLDVALLTALLK		723.394	4	2889.55	6665700	467120
U	ELLTVFHLGSDEHQDLDVALLTALLK		723.394	4	2889.55	860820	814830		190750
U	ELLTVFHLGSDEHQDLDVALLTALLK		964.19	3	2889.55	1319000	196280
U	QYSNDFGQLAVELLEQSFR	Gln->pyro-Glu	743.027	3	2226.06	2637000
U	HNHFLK		398.217	2	794.419	137570
U	QDETMAMK		477.207	2	952.399	140610
U	QGNLPPGYK	Gln->pyro-Glu	478.745	2	955.476	491700
U	QGNLPPGYK		487.259	2	972.503				39219.1
U	ECVYLLPSSK	Propionamide	605.313	2	1208.61			3.0482e+06
U	EDTVLHLCLR	Carbamidomethyl+Glu->pyro-Glu	413.217	3	1236.63	255910
U	ELEKTLNQQR	Glu->pyro-Glu	620.836	2	1239.66	181820
U	DDKFNSGSEER		642.279	2	1282.54	142660
U	RECVYLLPSSK	Carbamidomethyl	676.356	2	1350.7	263180
U	FLWQHGEESMAK	Oxidation	739.84	2	1477.67	261060
U	LRELLSNDTPENTLK	Phospho	608.303	3	1821.89	348110
U	KLCTLGLAPWGVLENR	Propionamide	614.342	3	1840	560290
U	FPYPLNELLLWACLMK	Carbamidomethyl	670.019	3	2007.04	234260
U	LHDFEEQCVEMYFDEK	Carbamidomethyl	706.964	3	2117.87	597050
U	RFPYPLNELLLWACLMK	Carbamidomethyl	722.053	3	2163.14	431510
U	QYSNDFGQLAVELLEQSFR		1122.55	2	2243.09	835610
U	KLHDFEEQCVEMYFDEK	Carbamidomethyl	749.663	3	2245.97	361300
U	LRPFVAHTCTQMLLSDMWMGR	Carbamidomethyl	638.311	4	2549.22	407920
U	SLQSLDSQLGHLQDLSALTVDTLK	Phospho	888.116	3	2661.33	1829300
U	GELLVLDLQGVGENLTDPSVLKAEEK		922.831	3	2765.47	6180300
U	HVGAAGYSECCKTSTSLHSVQAESCSR	Carbamidomethyl+Carbamidomethyl+Carbamidomethyl	743.079	4	2968.29	158290
U	QSDLVDDTSEELKQYSNDFGQLAVELLEQSFR	Gln->pyro-Glu	1229.58	3	3685.73	815380
U	QSDLVDDTSEELKQYSNDFGQLAVELLEQSFR		1235.26	3	3702.75	441860
U	SHETFGNR		474.22	2	946.426
U	LTLLDLGLVLEYLMGGTYR		714.062	3	2139.16
U	QYSNDFGQLAVELLEQSFRQDETMAMK	Gln->pyro-Glu	1054.49	3	3160.45
	SPTB2_MOUSE|Q62261	Spectrin beta chain, non-erythrocytic 1
U	VQAVVAVAR		456.785	2	911.555	206500	88322	40778000	80907.1	511610	103590	116560	2150154
N	LLSDLNK		401.737	2	801.46	113130	64105.1	2.7722e+07	48226.1	266860	74864.1	80537.1	1438554
U	LAGLEER		394.219	2	786.423	99066.1	71454.1	24716000	67710.1	320310	62893.1	104730	1216708
U	LLDPEDLSVDHPDEK		574.612	3	1720.82		111120	48712000	67894.1	464730	76222.1	120100	2149231
U	LFQLNR		395.732	2	789.45	92472.1	67562	2.7332e+07	30691.1	241220	53735.1	54603	1175415
U	VLLLSQDYGK		568.321	2	1134.63	120720	61009.1	43670000	59750.1	279030	59823.1		1859231
U	EAEKLESEHPDQAQALLSR		538.522	4	2150.06	168710	204440	48686000		393900	111540	114990	2182154
U	SAASGLPYHSEVPVSLK		581.309	3	1740.9	108600	48828.1	39790000		307840	64516.1	113520	1819692
U	VAVVNQLAR		485.296	2	968.577	242040		61826000	106930	812430	120490	194990	2.78446e+06
U	LDDLFER		454.23	2	906.445	169150	108220	34942000	84319.1	446250		119030	1663692
U	ALVADSHPESER		437.549	3	1309.63	105390	67578.1	3.4434e+07	41594.1	294360		65490.1	1.75908e+06
U	ELGQSVDEVEK		616.804	2	1231.59	183070	114480	53094000	74518.1	437280		122160	1631846
U	VLDNALETEK		566.298	2	1130.58	938300	92281.1	55098000		385260	110560	151040	2179692
N	ELVDRK	Glu->pyro-Glu	371.216	2	740.418	100950	75166.1	617860	13047.1		74380.1	20927.1	212738
U	LLEVLSGER		508.293	2	1014.57	149860	91694.1	45394920		444780	100290		2287846
U	ELEAENYHDLKR		506.251	3	1515.73	70689.1	63871.1	49310000		257520	57072.1		1.29989e+06
U	SNAHYNLQNAFNLAEQHLGLTK		621.566	4	2482.24	125560	103540	57248000		408150	201240		1703692
N	LHCLENVDK	Carbamidomethyl	376.522	3	1126.54	66363.1		31390000	26101.1	132230		39550.1	877600
U	LLLEVHQFSR		414.572	3	1240.69	163300	61263.1	36526000		378840	76080.1		1837692
U	AQTLPTSVVTLTSESSPGKR		687.039	3	2058.1	121840	128110	41730000		405610		72366.1	1670615
U	SQNLLTDSSSLNAEALR		909.963	2	1817.91	121790		25640000	48985.1	238930	50928.1		1003123
U	LQAAYAGDK		468.743	2	935.471	38323.1		6235800	34555.1	72099.1		42799.1	429031
U	LWEYLLELLR		674.387	2	1346.76	190600		72404000	84413.1	171570		92205.1	4628308
U	EQWANLEQLSALR		779.405	2	1556.79	98529.1		12521400		224790	79926.1	62246.1	701015
U	DQNTVETLQR		602.302	2	1202.59	79112.1		13588000	41123.1	116350	194712		928708
U	SALPAQSAATLPAR		677.378	2	1352.74			49618000	94628.1	426970	91805.1	95643	1209477
U	EAASELLMR		510.263	2	1018.51	44471.1		20218000	19357.1	46362.1		18731.1
U	QLEAQEKPR	Gln->pyro-Glu	541.285	2	1080.56		48588.1	31662000			48517.1	61717.1	1459738
U	TQLLAASYELHK		458.586	3	1372.73	128390		49362000		343770	62866.1		2.37185e+06
U	LVSSNDVGHDEYSTQSLVK		693.339	3	2077	108320		43480000		307300	86435.1		2038308
U	KHEALETDLAAYEER		592.292	3	1773.85	60621.1		43624000		219610	36574.1		1181754
U	SQNLLTDSSSLNAEALR		606.978	3	1817.91	107200		15485800	49026.1			60797.1	879077
U	LVSDGNLNSDR		595.294	2	1188.57	82602	56722.1	14887800		126260			849108
U	DLVALEAK		429.75	2	857.486	70412.1	58633.1	18297400		238140			1058185
U	MPLATSTDHGHNLQTVQLLLK		580.064	4	2316.23	78453.1		31974000		147550	43628.1		1494308
U	LTDLYTDLRDGR		479.916	3	1436.73	100680		42884000		326750		38338.1	846308
U	LSDGNEYLFQAK		692.841	2	1383.67	85967.1			39951.1	125920		45154.1	751277
U	LNAVVETGR		479.769	2	957.524	29787.1	27103.1	4625200		61463.1			582354
U	ENEVLEAWK		559.28	2	1116.55			19518000	24128.1	191830			865477
N	FQLQDLSVETEDNKEK		641.65	3	1921.93	105580		38948000		254400			1802154
U	TQLLAASYELHK		687.375	2	1372.73	32015.1		11450000		94744.1			438646
U	QLWGLLLEETEKR	Gln->pyro-Glu	799.433	2	1596.85	210560		119958000		481110			3.226e+06
N	LQQFLR		402.74	2	803.465	63461.1		27366000		210140			867969
U	EGMQLLSEKPETEAVVK		629.996	3	1886.97			36510000			83459.1	42180.1	1835385
U	TAGYPNVNLHNFTTSWR		659.99	3	1976.95			25296000		216630	63568.1		796892
U	HQLLEQAVEDYAETVHQLSK		780.061	3	2337.16	120100	76621.1	44514000					1212277
U	MLTAQDMSYDEAR		765.832	2	1529.65			17432400		24334.1	29412.1		844200
U	HLLGVEDLLQK		422.247	3	1263.72			6851400		102150		56602.1	495923
U	QALQDTLALYK		632.351	2	1262.69			8995800		101360		22940.1	318923
U	LQALDTGWNELHK		508.932	3	1523.77			4.7102e+07		346920		118130	2263846
U	DALLSALSLQNYHLECNETK	Carbamidomethyl	773.714	3	2318.12	84420.1		19864800		99029.1			712769
N	ETWLSENQR		581.778	2	1161.54			24912000		142730	259420		483554
U	LTTLELLEVRR		448.273	3	1341.8			25212000		223550	76839.1		376646
U	MPLATSTDHGHNLQTVQLLLK		773.083	3	2316.23			14954400		95312.1	197010		566400
U	TLETPAAQMEGFLNR		559.947	3	1676.82	35840.1		12079400		58827.1			773446
U	HALVEADLALQAER		512.611	3	1534.81			5399400		74882.1	35876.1		446423
U	ELEELQSQAQALSQEGK		629.981	3	1886.92	59204.1		7495800		57949.1			718477
U	EVVAGSHELGQDYEHVTMLQER		632.552	4	2526.18	155960				172020		80790.1	2683846
N	ALADEREAVQK		410.554	3	1228.64			11874000		66167.1	1.7628e+06		276662
N	VHLENMGSHDLVDGNHR		483.23	4	1928.89			31306000		68258.1			917785
U	EAEKLESEHPDQAQALLSR		717.694	3	2150.06			19832800		136690			664846
U	FATDGEGYKPCDPQVLR	Carbamidomethyl	651.644	3	1951.91			42084000		342830			1669538
U	LTTLELLEVR		593.856	2	1185.7			31772000		357070			1701846
U	HLLGVEDLLQK		632.867	2	1263.72	88931.1		21234000		200990
U	SAATWDER		468.214	2	934.414			10817600		80877.1			588738
U	LLSSDDYGKDLTSVMR		600.633	3	1798.88			30248000		59072.1			1003308
U	LVDTGDKFR		525.783	2	1049.55			5962400		44884.1			147182
N	LHCLENVDK	Carbamidomethyl	564.279	2	1126.54			7081400		29909.1			149925
U	QALQDTLALYK	Gln->pyro-Glu	623.838	2	1245.66			15229400		129370			683477
U	LNAVVETGRR		372.216	3	1113.63			6347600		59297.1			430892
N	QEKLEQLAR	Gln->pyro-Glu	549.301	2	1096.59			17197800		130420			373831
U	LQALDTGWNELHK		762.894	2	1523.77			4664200		29405.1			221923
U	FESLEPEMNNQASR		826.373	2	1650.73			14545000				26456.1	659892
U	LVSQDNFGFDLPAVEAATK		1011.51	2	2021.01			15286400		225160			473062
U	SNAHYNLQNAFNLAEQHLGLTK		828.419	3	2482.24			13317800		113860			322169
U	FMELLEPLSER		682.35	2	1362.69			23300000		69316.1			1106662
U	MHTTFEHDLQALGTQVR		661.995	3	1982.96			13107800		74024.1			461923
U	QLQEDAAR	Gln->pyro-Glu	457.222	2	912.43			4396400		38700.1			285200
U	AFEDEMSGR		521.219	2	1040.42			18734800		46275.1			1086123
U	QNLLSQSHAYQQFLR		611.652	3	1831.93			14342200		178470			584400
U	SLLTYVVTYYHYFSK		628.657	3	1882.95			76470000		438890	874770
U	EVDDLEQWLAER		751.86	2	1501.7			27426000			364730		1110138
U	EVVAGSHELGQDYEHVTMLQER	Oxidation	636.551	4	2542.18			7595600	32682.1				439215
N	FFSMVR		393.702	2	785.389			11510000		49643.1			639108
U	QNLLSQSHAYQQFLR	Gln->pyro-Glu	908.46	2	1814.91			31524000		204660			828215
U	LVSQDNFGFDLPAVEAATK		674.677	3	2021.01		35901.1	14815400		201090
U	LEMNLGLQK		523.289	2	1044.56			20924000		122560			1705538
U	DVEDELLWVGER		730.357	2	1458.7			12090600		107800			975446
U	EALCEVALDYK	Carbamidomethyl	655.818	2	1309.62			6263200		77648.1			502615
U	DGMAFNALLHK		406.21	3	1215.61	29875.1		15009800					879585
U	LLTQHENLKNELDNYEEDYQK		659.817	4	2635.24			74334000				61085.1	2519846
U	FESLEPEMNNQASR		551.251	3	1650.73			4688600	12723.1				363692
U	LVSDGNLNSDRLQEK		563.292	3	1686.85			2.7222e+07		192480			469892
U	KLTGMER		417.729	2	833.443			8176400					145560
U	EMAELTR		425.21	2	848.406			1937960					157923
U	ELHQFNR		472.241	2	942.467			1905840					112289
U	DTGNLGQER		495.236	2	988.457			1135560					182938
U	VDKLYAGLK		503.8	2	1005.59			1989980					59677.1
U	EAASELLMR	Oxidation	518.261	2	1034.51			4176200					155385
U	AFEDEMSGR	Oxidation	529.216	2	1056.42			1470020					105638
N	DLTSVNLLLK		558.337	2	1114.66			3982400					327431
U	CKEMAELTR	Carbamidomethyl	379.851	3	1136.53			3697800					156492
U	SLLDACEGRR	Carbamidomethyl	588.793	2	1175.57			4331200					86998.1
U	DGMAFNALLHK		608.811	2	1215.61			5680000					231092
U	LLLEVHQFSR		621.354	2	1240.69			6805600		86867.1
U	QLMHNGHPSEK	Gln->pyro-Glu	420.865	3	1259.57			8457000					559000
N	DALLLWCQMK	Carbamidomethyl	639.323	2	1276.63			16035800					933246
N	DALLLWCQMK	Carbamidomethyl+Oxidation	647.32	2	1292.63			2236400					157446
U	AKDEQSAVSMLK		653.837	2	1305.66			2938800					101392
U	AKDEQSAVSMLK		436.227	3	1305.66			8309000					494631
U	LQEKVDSLDDR		439.893	3	1316.66			5554000					156677
U	QRLEMNLGLQK	Gln->pyro-Glu+Oxidation	664.853	2	1327.69			2272400					61055.1
U	QRLEMNLGLQK		443.915	3	1328.72			2311200		20896.1
U	RLVSDGNLNSDR		449.232	3	1344.67			3209600					148600
U	NDSFTACLELGK	Carbamidomethyl	677.819	2	1353.62			9651400					642815
U	LYAGLKDLAEER		459.917	3	1376.73			7486400					255969
U	DLDDFQSWLSR		691.323	2	1380.63			59706000					2143077
U	FYHDAKELFGR		461.567	3	1381.68			5539000		90407.1
U	QQMLENQMEVR	Gln->pyro-Glu	694.818	2	1387.62			4937800					272969
U	DLMLWMEDVLR		710.852	2	1419.69			46262000					1377185
U	LTDLYTDLRDGR		719.37	2	1436.73			4329800					84552.1
U	LAELSDVWEEMK		725.35	2	1448.69			22024000					1199400
U	MWEVLESTTQTK		726.856	2	1451.7			15956800					636154
U	DVEDELLWVGER		487.24	3	1458.7			2027000					241923
N	GNLEVLLFTLQSK		487.949	3	1460.82			44558000					2485846
U	FMELLEPLSERK		497.934	3	1490.78			3946000					130266
N	HRPDLLDFDKLK		374.961	4	1495.81			4410600					236646
U	EVDDLEQWLAER		501.576	3	1501.7			1323740					237646
U	KQQMLENQMEVR		511.922	3	1532.74			10100200					460108
U	KQQMLENQMEVR	Oxidation	517.254	3	1548.74			1412540					38249.1
U	EQWANLEQLSALR		519.939	3	1556.79			3254000					278154
U	LQAAYAGDKADDLQK		536.274	3	1605.8			6381000					340215
U	QLWGLLLEETEKR		538.966	3	1613.88			7561800					260877
U	FESLEPEMNNQASR	Oxidation	834.37	2	1666.73			2841000					129031
U	TLETPAAQMEGFLNR		839.417	2	1676.82			13073600					438677
U	EGEDMLAEEHFGSEK		569.91	3	1706.71			7693400					509615
U	LLDPEDLSVDHPDEK		861.415	2	1720.82			3241200					126006
U	SAASGLPYHSEVPVSLK		871.46	2	1740.9			3226800					91055.1
U	KHEALETDLAAYEER		444.471	4	1773.85			25276000		159770
U	DVSSVELLMNNHQGLK		892.454	2	1782.89			6063600					141175
U	LLSSDDYGKDLTSVMR		900.446	2	1798.88			2776400					53074.1
U	KQEDFMTTMDANEEK		606.262	3	1815.77			3881200					404123
U	DGLNEAWADLLELLDTR		648.662	3	1942.96			44130000					1397123
U	LPEELGRDQNTVETLQR		666.68	3	1997.02			16128600					553692
U	MHTTFEHDLQALGTQVR	Oxidation	667.327	3	1998.96			2660800		37448.1
U	VLESTQDLGNDLAGVMALQR		710.7	3	2129.08			46268000					1321246
U	FANSLVGVQQQLQAFNTYR		1092.56	2	2183.11			13989000	196100
U	VAHMEFCYQELCQLAAER	Carbamidomethyl+Carbamidomethyl	752.34	3	2254			14927200					651923
U	EVVAGSHELGQDYEHVTMLQER		843.068	3	2526.18			14397200					572169
U	SGHFEQALKEGEDMLAEEHFGSEK		541.849	5	2704.21			20338000		70813.1
U	SGHFEQALKEGEDMLAEEHFGSEK		677.059	4	2704.21			24896000					547138
U	VDTVNNMADELLNSGHSDAATLAEWK		934.44	3	2800.3			67486000					2320308
N	HRPDLLDFDK		419.219	3	1254.64							49857.1	879846
U	TQTALASEDMPNTLTEAEK		683.993	3	2048.96			9.7838e+06				122870	668200
U	QQMLENQMEVR		703.332	2	1404.65			2.0522e+06					131154
U	EALCEVALDYKK	Carbamidomethyl	480.246	3	1437.72			1.65666e+07		101470			800877
U	HNLLASK		391.73	2	781.445								118832
U	FREFAR		413.222	2	824.429			4515400
N	ALAVEGKR		422.256	2	842.497			2119000
U	LLQLTEK		422.761	2	843.506			32362000
U	RLTVQTK		423.264	2	844.513			1708320
U	KHNLLASK		455.777	2	909.54			498100
N	RHEAFEK		458.735	2	915.456			243060
U	LNAVVETGRR		557.82	2	1113.63			919560
U	HEWEAHNKK		393.528	3	1177.56			166100
U	KHEWEAHNK		393.528	3	1177.56			916180
U	RPPSPDPNTK	Phospho	594.774	2	1187.53			441840
N	ALADEREAVQK		615.328	2	1228.64			2961800
U	HYASEELKEK		411.875	3	1232.6			4232000
U	QLMHNGHPSEK	Gln->pyro-Glu+Oxidation	426.196	3	1275.57			497740
U	QLMHNGHPSEK		426.54	3	1276.6			183348
U	NREAASELLMR		645.335	2	1288.66			1243960
U	ALVADSHPESER		655.82	2	1309.63			3895000
U	LTTLELLEVRR		671.906	2	1341.8			3093600
U	KQALQDTLALYK		464.601	3	1390.78			2679600
U	QLWGLLLEETEK	Gln->pyro-Glu	721.382	2	1440.75			2619600
N	GNLEVLLFTLQSK		731.419	2	1460.82			73212000
U	MWEVLESTTQTK	Oxidation	734.853	2	1467.69			1377160
U	ELEAENYHDLKR		758.873	2	1515.73			1941920
U	MLTAQDMSYDEAR	Oxidation	773.829	2	1545.64			2111400
U	VSEEAESQQWDTSK		812.36	2	1622.71			978620
N	FQLQDLSVETEDNK		833.402	2	1664.79			3336800
U	TLETPAAQMEGFLNR	Oxidation	847.414	2	1692.81			2597400
U	QNLLSQSHAYQQFLR	Gln->pyro-Glu	605.976	3	1814.91			8375200
U	ELEELQSQAQALSQEGK		944.468	2	1886.92			8710400
U	FLQDCQELSLWLNEK	Carbamidomethyl	641.649	3	1921.92			6095000
U	FLQDCQELSLWLNEK	Carbamidomethyl	961.969	2	1921.92			525740
N	VHLENMGSHDLVDGNHR		643.971	3	1928.89			3240400
U	DGLNEAWADLLELLDTR		972.489	2	1942.96			34660000
U	DASVAEAWLLGQEPYLSSR		1046.52	2	2091.03			26712000
U	DASVAEAWLLGQEPYLSSR		698.016	3	2091.03								3.28692e+06
U	VLESTQDLGNDLAGVMALQR		1065.55	2	2129.08			10559800
U	SWHNVYCVLNNQEMGFYK	Carbamidomethyl	763.679	3	2288.01			13173800
U	KFANSLVGVQQQLQAFNTYR		771.41	3	2311.21			5731600
U	TKVLESTQDLGNDLAGVMALQR		787.081	3	2358.22			9922800
U	ELHQFNRDVEDELLWVGER		795.393	3	2383.16			3574200
U	VAHMEFCYQELCQLAAERR	Carbamidomethyl+Carbamidomethyl	603.532	4	2410.1			6205800
U	KHQLLEQAVEDYAETVHQLSK		617.321	4	2465.26			12405400
U	KSNAHYNLQNAFNLAEQHLGLTK		653.59	4	2610.33			4093000
U	LLTQHENLKNELDNYEEDYQK		879.421	3	2635.24			11457200
U	TTTVATDYDNLELQQQYSDVNNR	Acetyl	910.754	3	2729.24			2355800
U	VDTVNNMADELLNSGHSDAATLAEWK	Oxidation	939.771	3	2816.29			2772200
U	LEEASLLHQFQADADDLDAWMLDLLK		1000.83	3	2999.46			7696600
U	QAEAFLNNQEYVLAHTEMPTTLEGAEAALK	Gln->pyro-Glu	1091.53	3	3271.57			44462000
U	QAEAFLNNQEYVLAHTEMPTTLEGAEAALK		1097.21	3	3288.6			28794000
U	DVAEELTNYRPTLDTLHEQASALPQAHAESPDVK		937.213	4	3744.82			9625800
U	LPEELGR		407.227	2	812.439	38150.1	64663.1						241369
U	EGMQLLSEKPETEAVVKEK		537.033	4	2144.1
U	KQQMLENQMEVR		767.379	2	1532.74
U	NDSFTACLELGKSLLAR	Carbamidomethyl+Phospho	658.983	3	1973.93
U	MPLATSTDHGHNLQTVQLLLK	Oxidation	584.063	4	2332.22
U	HQLLEQAVEDYAETVHQLSK		585.297	4	2337.16			8.3818e+06					316585
	MYO5A_MOUSE|Q99104	Unconventional myosin-Va
U	AATLVLQSYLR		617.861	2	1233.71	164200	49196.1	38222000	100660	451060	103770	104830	7068923
U	VLSLQEELAK		565.327	2	1128.64	342830	118220	6.70715e+07	111970	600260	281200	133400	12151846
N	ACGVLETLR	Carbamidomethyl	509.771	2	1017.53	147500	80452.1	46840000	62130.1	209980	116030	81826.1	7412308
U	VSVSFLR		404.24	2	806.465	135060		29408000	63277.1	286630	111590	84603.1	5708923
U	YQNLLNEFSR		642.323	2	1282.63	233700	97346.1	56964000	94613.1	320750	182610		9626769
U	LSAAGFPSR		453.246	2	904.477		141460	17226400	44594.1	193690	62676.1	16894.1	2582154
U	AALTVQR		379.73	2	757.445	141870	52182.1	26540000	65792.1	316110	145530		5873077
U	LLESQLQSQK		587.327	2	1172.64	105090	29951.1	23502000	50095.1	124400	74004.1		5.76246e+06
N	TYLLEK		383.721	2	765.427	83063		26206000	37341.1	134270	63035.1		4700308
U	ETLEPLLQAAQLLQVK		598.684	3	1793.03	795820	182870	109248000		885460	452640		20533846
U	VLNLYTPVNEFEER		861.938	2	1721.86	185400		54430000		339200	170760	83465.1	9253385
U	QKDVLGDR	Gln->pyro-Glu	457.241	2	912.466	121080	83061.1		70858.1	78520	113940		2617385
U	LEASLQHELTR		432.902	3	1295.68	336660		81108000	93062.1	573180	222750		12222000
U	LLAGLLHLGNVGFASR		546.654	3	1636.94	265330	87895.1	49738000		355610	180870		11272769
U	SAPEVTAPGAPAYR		693.854	2	1385.69	199880		3.7266e+07		244460	143340	66025.1	3979846
U	GTDDTWAQK		511.233	2	1020.45	35945.1		7604000		49319.1	43010.1	29813.1	2169385
U	HADYLNDDQKVR		491.908	3	1472.7	171820	53841.1	48102000		159360		31193.1	3644923
U	LLESQLQSQKR		443.921	3	1328.74	125150	64023.1	42002000		174080	92576.1
U	FPFTFDEKR		396.201	3	1185.58	38764.1	18251.1	6985600		43410.1			1318954
N	VWLPDPEEVWK		699.359	2	1396.7		42490.1	14203200		145580	108950		3.16662e+06
N	LQQQFNMHVFK		473.912	3	1418.71	71773.1		35148000		84264.1	105100		7889077
U	NLLLELKPR		548.348	2	1094.68	54354.1		8611000		69673.1	28886.1		1358477
U	LATATETYLKPLSK		512.627	3	1534.86			34444000		184760	104210	30130.1	6.446e+06
U	NKDTVFEEQLK		450.901	3	1349.68	110410		33632000		129720	82749.1		3784923
U	QLELDLNDERLR	Gln->pyro-Glu	748.889	2	1495.76	117190		38774000		152220	83296.1		3514000
U	LTNLEGVYNSETEKLR		622.658	3	1864.95	87231.1		3.6678e+07		152580	72694.1		2997538
U	YLELGFDKR		380.873	3	1139.6	109500	36912.1	41806000		185310			6651231
N	AGQVAYLEK		489.766	2	977.518				92300.1	363670	152710	130390	8691846
U	YFATVSGSASEANVEEK		894.918	2	1787.82	87828.1		23673860	31644.1	177830			3794154
U	TSSLADEGTYTLDSLLR		921.46	2	1840.91	432990		83796000		717790	269880		5388769
U	HADYLNDDQK		609.773	2	1217.53	49002.1		6330400		30395.1		23679.1	1405277
U	YLCMQR	Carbamidomethyl	435.702	2	869.389			1.78496e+07		70781.1	70329.1	20637.1	4315385
U	SLLTSTLNSLK		588.845	2	1175.68	114830		14149400		216260	76311.1		4334000
U	VVFQAEEER		553.777	2	1105.54			12273400	43505.1		47018.1	80159.1	6542615
U	LGNADSFHYTK		418.203	3	1251.59			49496000		253830	117500		9270923
U	QLELDLNDERLR		505.27	3	1512.79			16059400		137600	53797.1		983400
U	KVPLDMSLFLK		430.921	3	1289.74			14217000		46133.1	51370.1		3475077
U	LTNLEGVYNSETEK		798.891	2	1595.77	112200		27436000		134480			4844615
U	KVPLDMSLFLK		645.878	2	1289.74	32923.1		13429200		39502.1			2116769
U	RAATLVLQSYLR		464.277	3	1389.81			5258600		57287.1	33308.1		1309108
U	LMQLQR		394.726	2	787.437			20086000		50661	56303.1		3942462
U	SLLTSTLNSLKK		435.598	3	1303.77	66953.1		21806000		178190			3404154
U	ALVYLQCCFR	Carbamidomethyl+Carbamidomethyl	665.326	2	1328.64	104550		27120000		139060			5811231
U	LLGANMR		387.718	2	773.422	49778.1		1.84084e+07		31886.1			4155538
U	VLLLHLEEGKDLEYR		457.506	4	1825.99	177880		2.99781e+07		130910			10072308
U	DSPQLLMDAK		559.282	2	1116.55			18236000		28995.1			3030923
U	EMTETMER		513.715	2	1025.42			9163200			18193.1		2231077
U	LLAGLLHLGNVGFASR		819.478	2	1636.94			6114600		57435.1			1051508
N	YLELGFDK		492.755	2	983.496			3355600		20354.1			926400
U	YFATVSGSASEANVEEK		596.948	3	1787.82			9903000		100400			2708000
U	GAELEYESLK		569.785	2	1137.56			11631600		59715.1			1765846
U	MLPELFQDDEKALSPTSATSSGR	Phospho	854.059	3	2559.16	93935.1		11005200					1455954
N	NPDLLVGENDLTALSYLHEPAVLHNLR		754.149	4	3012.57	1.0292e+06		254540000					33178462
U	SLLTSTLNSLKK		652.893	2	1303.77			7651600		102760			1016938
U	DKGELAQAYLGLK		703.388	2	1404.76			4499600		42849.1			591600
U	NKDTVFEEQLK		675.849	2	1349.68			10119600		34189.1			931569
U	LMQLQR	Oxidation	402.723	2	803.432			2458400			65851.1		458092
U	VTELEQEK		488.253	2	974.492			9235800		57095.1			3140769
U	QNEHCLTNFDLAEYR	Carbamidomethyl	637.288	3	1908.84	85085.1		10765600					1478846
U	HFADKVEYQCEGFLEK	Carbamidomethyl	667.312	3	1998.91	78132.1		25776000					3179692
U	LEASLQHELTR		648.849	2	1295.68			8032400		42653.1			956615
U	KLGELEVGQMENLSPGQLLDEPLRPVNLPR		836.203	4	3340.78			28438000		40012.1			4819077
U	TSSLADEGTYTLDSLLR		614.642	3	1840.91	190470		40748000					4834769
N	QELESENKK	Gln->pyro-Glu	544.267	2	1086.52	36345.1		6444800					1695385
U	YNVSQLEEWLR		718.862	2	1435.71	154840		20006000					5451692
U	DKGELAQAYLGLK		469.261	3	1404.76			12525800				27749.1	2480769
U	ALSPTSATSSGR	Phospho	607.774	2	1213.53			5093400			28551.1		1065754
U	TEEPLEK		423.216	2	844.418	15077.1		4465000					1413277
U	QVLSDLALQLYQQLVR	Gln->pyro-Glu	935.525	2	1869.04			39988000		138600			10255846
U	LLGANMR	Oxidation	395.716	2	789.417			2.1752e+06		19063.1			432831
U	VLASNPLMESLGNAK		772.411	2	1542.81			21048000			44017.1		2747385
U	QNEHCLTNFDLAEYR	Carbamidomethyl+Gln->pyro-Glu	946.915	2	1891.82			19612800		69822.1			2764154
U	SHENEAEALR		385.851	3	1154.53	27083.1		3.3584e+06					824892
U	LTNENLDLMEQLEK		845.422	2	1688.83	100540		18026400			255120	54052.1	5043692
U	DTVFEEQLK		554.78	2	1107.54			1.96174e+06		20792.1			479323
U	QVLSDLALQLYQQLVR		629.695	3	1886.06			4.5478e+07			87388.1		7758615
N	RAVQQLR		435.767	2	869.519			1184960					263215
U	YLCMQR	Carbamidomethyl+Oxidation	443.699	2	885.384			1538380					383308
U	AASELYTK	Acetyl	462.737	2	923.46			10224600					1555077
U	LHLGMENK		471.247	2	940.48			8481800					637708
N	KEEVLLLR		500.313	2	998.612			6382000					1052800
U	LYNTHLNK		501.772	2	1001.53			4591200					555538
U	FPFTFDEK		515.748	2	1029.48			3114600					827246
U	DKNLMNSGAK		539.271	2	1076.53			2822400					400185
U	LKNELNELR		376.884	3	1127.63			4652400					1062154
U	RVTELEQEK		566.304	2	1130.59			14494600					1275000
U	DSPQLLMDAK	Oxidation	567.279	2	1132.54			2542000					263600
U	ALSPTSATSSGR		567.791	2	1133.57			7341600					1380585
U	QEKETLNHR	Gln->pyro-Glu	379.86	3	1136.56			2036800					402092
U	YLELGFDKR		570.806	2	1139.6			13156400					1149215
U	VLLLHLEEGK		384.233	3	1149.68			926060					687754
U	SHENEAEALR		578.273	2	1154.53			752420					122383
U	QYSGEEGFMK	Gln->pyro-Glu	579.742	2	1157.47			6446600					1489046
U	QYSGEEGFMK	Gln->pyro-Glu+Oxidation	587.74	2	1173.46			1688940					397215
U	QYSGEEGFMK	Oxidation	596.253	2	1190.49			1318100					123283
U	KDSPQLLMDAK		415.888	3	1244.64			3732600					881538
U	LGNADSFHYTK		626.801	2	1251.59			5326200					860723
U	AKEEERPQLR		419.23	3	1254.67			6652400					912538
U	WTYQEFFSR		632.293	2	1262.57			6010600					692938
U	GAELEYESLKR		647.835	2	1293.66			5844800					719738
U	KVPLDMSLFLK	Oxidation	436.253	3	1305.74			2647000					559908
U	LLESQLQSQKR		665.378	2	1328.74			5393600					392200
N	NQSLLVSGESGAGK		673.849	2	1345.68			30046000					4615538
U	MLPELFQDDEK		682.824	2	1363.63			12638200					2698923
U	QGGSPMLEGVDDAK	Gln->pyro-Glu	693.814	2	1385.61			2033400					715523
U	VEYQCEGFLEK	Carbamidomethyl	701.321	2	1400.63			3183600					720400
N	LGLLDLLDEECK	Carbamidomethyl	709.366	2	1416.72			28276000					7517846
N	LQQQFNMHVFK	Oxidation	479.243	3	1434.71			3772000					1011308
U	LATATETYLKPLSK		768.438	2	1534.86			2492400					409262
U	VLASNPLMESLGNAK		515.276	3	1542.81			2101400					854831
U	VLASNPLMESLGNAK	Oxidation	780.408	2	1558.8			3057600					350600
U	LTNLEGVYNSETEK		532.93	3	1595.77			3747600					1240154
U	KLATATETYLKPLSK		555.326	3	1662.96			20434000					2257077
U	YNVSQLEEWLRDK		560.618	3	1678.83			12740800					627369
U	ETLEPLLQAAQLLQVK	Glu->pyro-Glu	888.517	2	1775.02			2350800					656246
U	LGLLDLLDEECKMPK	Carbamidomethyl+Oxidation	597.307	3	1788.9			13639600					1472862
U	ETLEPLLQAAQLLQVK		897.522	2	1793.03			55290000					9258462
U	VLLLHLEEGKDLEYR		609.672	3	1825.99			15406200					4603077
U	QQQLLAQNLQLPPEAR	Gln->pyro-Glu	915.497	2	1828.98			5575400					863769
U	SHENEAEALRGELQSLK		637.657	3	1909.95			2678400					557615
U	QMFYLVGALTLNNLLLR	Gln->pyro-Glu	981.548	2	1961.08			2348000					261277
U	QACTLLGLSESYQMGLFR	Carbamidomethyl+Gln->pyro-Glu	1029	2	2055.98			16332600					1312431
U	DDKNTMTDSTLLLEDVQK		689.337	3	2064.99			28920000					5994923
U	QETDQLVSNLKEENTLLK	Gln->pyro-Glu	695.695	3	2084.06			2809200					1.65508e+06
U	LFNWLVDHVNQALHSAVK		523.534	4	2090.11			120984000					15091538
U	QETDQLVSNLKEENTLLK		701.371	3	2101.09			2166400					721262
U	QGGSPMLEGVDDAKEMAHTR		532.999	4	2127.97			2168400					372062
U	GVAVNLLPGLPAYLLFMCVR	Carbamidomethyl	1102.11	2	2202.21			13132800					1264308
U	NSLHLLMETLNATTPHYVR		553.29	4	2209.13			14539600					1765077
U	NSLHLLMETLNATTPHYVR		737.384	3	2209.13			6852200					800985
U	GVAVNLLPGLPAYLLFMCVR	Carbamidomethyl+Oxidation	740.407	3	2218.2			8975800					1335262
U	NSLHLLMETLNATTPHYVR	Oxidation	557.289	4	2225.13			2130800					208877
U	QLNSFHSVMCQHGMDPELLK	Carbamidomethyl+Gln->pyro-Glu	785.362	3	2353.07			12744200					2154923
U	QLNSFHSVMCQHGMDPELLK	Carbamidomethyl+Gln->pyro-Glu+Oxidation	790.694	3	2369.06			2122600					447108
U	MLPELFQDDEKALSPTSATSSGR		827.404	3	2479.19			3059000					326600
U	KTDDDAEALCSMCNALTTAQLVK	Carbamidomethyl+Carbamidomethyl	852.398	3	2554.17			7284000					1368138
N	NPDLLVGENDLTALSYLHEPAVLHNLR		1005.2	3	3012.57			35746000					4315692
U	TDSTHSSNESEYTFSSEFAETEDLAPR		1013.1	3	3036.27			5334800					1.01524e+06
U	LGELEVGQMENLSPGQLLDEPLRPVNLPR		804.179	4	3212.69			12966000					3316769
U	LGELEVGQMENLSPGQLLDEPLRPVNLPR		1071.9	3	3212.69			23726000					3148769
U	KLGELEVGQMENLSPGQLLDEPLRPVNLPR	Oxidation	840.201	4	3356.78			7841800					1.00909e+06
U	KLGELEVGQMENLSPGQLLDEPLRPVNLPR	Phospho	856.194	4	3420.75			20212000					3137385
U	VLENLLQPMLVSGMLEHETLQGVSGVKPTGLR		862.219	4	3444.85			120938000					9230462
U	GELQSLK		387.721	2	773.428			608160					199077
U	DVLGDRK		401.725	2	801.434			978540					328508
N	FLHCLK	Carbamidomethyl	409.223	2	816.432			5.7498e+06					1022738
U	DFQGMLEYK		565.763	2	1129.51			2.6416e+06					1575385
U	HADYLNDDQK		406.851	3	1217.53			290980					207462
U	QLELDLNDER	Gln->pyro-Glu	614.296	2	1226.58			3.5096e+06					2794615
U	AATLVLQSYLR		412.243	3	1233.71			849740					474508
U	QLMQDELDRK	Gln->pyro-Glu	629.808	2	1257.6			560780					874708
U	DFQGMLEYKR		643.814	2	1285.61			1.65182e+06					320277
U	DFQGMLEYKR		429.545	3	1285.61			4.8354e+06					1004231
U	SRVVFQAEEER		450.565	3	1348.67			1.41674e+06					194231
U	MLPELFQDDEK	Oxidation	690.821	2	1379.63			3.4332e+06					828215
N	LQQQFNMHVFK		710.364	2	1418.71			2.4626e+06					379185
U	VLNLYTPVNEFEER		574.961	3	1721.86			3.3878e+06					1285769
U	QQQLLAQNLQLPPEAR	Gln->pyro-Glu	610.667	3	1828.98			1.24358e+06					362231
U	QQQLLAQNLQLPPEAR		616.343	3	1846.01			2.5322e+06					355862
U	QNEHCLTNFDLAEYR	Carbamidomethyl+Gln->pyro-Glu	631.613	3	1891.82			6.5936e+06					1986615
U	VLMEQLTSVSEELDVRK		659.35	3	1975.03			2.9335e+06					1343785
U	DDKNTMTDSTLLLEDVQK	Oxidation	694.668	3	2080.98			9.2278e+06					1267723
U	QGGSPMLEGVDDAKEMAHTR	Gln->pyro-Glu+Oxidation	709.986	3	2126.94			3.7928e+06					662908
U	GVAVNLLPGLPAYLLFMCVR	Carbamidomethyl	735.076	3	2202.21	78994.1							6351846
U	YDDLKEEMTLMLNVPKPGHK		472.442	5	2357.18			1.49786e+06					750338
U	YDDLKEEMTLMLNVPKPGHK		590.301	4	2357.18			2.4922e+06					866677
U	VLENLLQPMLVSGMLEHETLQGVSGVKPTGLR	Oxidation	866.218	4	3460.84			3.1486e+07					3228154
U	LTNENLDLMEQLEK	Oxidation	853.419	2	1704.82			2204200					442062
U	LTNENLDLMEQLEKQDK		687.677	3	2060.01			30924000					3899231
U	RYLCMQR	Carbamidomethyl	513.752	2	1025.49			1349460
N	LEQEEYMK		535.247	2	1068.48								2598308
U	RVTELEQEK		377.872	3	1130.59								517292
U	KDSPQLLMDAK		623.329	2	1244.64			4287000
U	KVPLDMSLFLK	Oxidation	653.876	2	1305.74			2363800
U	LGLLDLLDEECKMPK	Carbamidomethyl	591.976	3	1772.91			69852000
U	QVLSDLALQLYQQLVR	Gln->pyro-Glu	624.019	3	1869.04			2942800
U	QVLSDLALQLYQQLVR		944.039	2	1886.06								1082123
U	QMFYLVGALTLNNLLLR	Gln->pyro-Glu+Oxidation	989.545	2	1977.08			1764840
U	LFNWLVDHVNQALHSAVK		697.709	3	2090.11			39466000
U	MLPELFQDDEKALSPTSATSSGR	Oxidation+Phospho	859.391	3	2575.15			2464800
U	HLFPVTFPFNPSSLALETLQLPASLGLGFLAR		1151.97	3	3452.89			4527600
U	TVGHQFR		422.725	2	843.435			1.54106e+06
U	KLVEETK		423.75	2	845.486								138055
U	KEEQVFR		468.251	2	934.487								145886
N	LEQEEYMK	Oxidation	543.245	2	1084.47								207677
U	QLMQDELDR	Gln->pyro-Glu	565.761	2	1129.51								305277
U	DFQGMLEYK	Oxidation	573.76	2	1145.51								301569
U	QLMQDELDR		574.274	2	1146.53			82108.1
U	QLELDLNDER		622.809	2	1243.6			2.6712e+06
U	QLMQDELDRK	Oxidation	431.215	3	1290.62	397390
U	RAATLVLQSYLR		695.912	2	1389.81								222585
U	GELQSLKEENNR		472.907	3	1415.7				25188.1				1789692
U	GELQSLKEENNR		708.857	2	1415.7								108148
U	NYHLFYQLCASAK	Carbamidomethyl	538.929	3	1613.77								1601231
U	VLLLHLEEGKDLEYR		914.004	2	1825.99								522446
U	VLMEQLTSVSEELDVR		616.652	3	1846.93								1483508
U	VLMEQLTSVSEELDVR		924.475	2	1846.93								948492
U	HFADKVEYQCEGFLEK	Carbamidomethyl	500.736	4	1998.91								976846
U	TDDDAEALCSMCNALTTAQLVK	Carbamidomethyl+Carbamidomethyl	809.699	3	2426.08								1279415
U	LTNENLDLMEQLEK		563.95	3	1688.83								1185077
U	LRNDVER		451.246	2	900.478
U	GDDFETVSFWLSNTCR	Carbamidomethyl	967.423	2	1932.83
U	LTNENLDLMEQLEKQDK	Oxidation	693.009	3	2076			2927400
	ANK3_RAT|O70511	Ankyrin-3
N	LGYLSVVDTLK		604.35	2	1206.69	66896.1	36696.1		49897.1			84457.1	5397077
U	GDATPNLR		422.22	2	842.425	197990	21592.1		53446.1				1461062
U	LEVASLLLQK		557.347	2	1112.68			767780	25723.1			36581.1	8874615
U	TNDPVESSLR		559.278	2	1116.54			2.3516e+06			2.9073e+06		4088000
U	LVNFLLQHSAK		423.915	3	1268.72			1657380			14856.1		9668000
N	VMELLLK		423.262	2	844.509			799160					6810615
N	GFTPLHVAAK		520.798	2	1039.58			1534620					569123
U	AAAVDFTAR		461.243	2	920.471					67937.1			9660308
U	ATFSPLVTVEPR		658.864	2	1315.71			1.31088e+06	55192.1	40744.1			11860154
U	SLSDVASPLR		522.788	2	1043.56			884640					3709846
N	GETALHMAAR		528.766	2	1055.52			1.13974e+06					1150615
U	QSLKENLKPK	Gln->pyro-Glu	389.896	3	1166.67			372780					1776000
U	VPTLTEATPLK		585.342	2	1168.67			84692.1					1224292
N	NGYTPLHLAAK		395.552	3	1183.63			1653500					1232646
U	NDLTPLHVASK		398.887	3	1193.64			381340					4702462
U	DGLTPLHCGAR	Carbamidomethyl	399.533	3	1195.58			441640					3370923
N	ELLCVPYMAK	Carbamidomethyl	612.312	2	1222.61			475220					2964154
U	DGLTPLHCGAR	Propionamide	605.803	2	1209.59							34185.1	99232
U	VGLQAQPVPEETVK		747.912	2	1493.81							24668.1	5458000
U	YSYLTEPSMK		609.789	2	1217.56						448330		1515723
N	DFPQYFAVVSR		664.835	2	1327.66	59656.1		6898000					8011231
N	ALNGFTPLHLACK	Carbamidomethyl	481.259	3	1440.75			1.70118e+06					2232308
U	AKDDQTPLHLSAR		484.592	3	1450.75			699140					3046000
U	YGKLEVASLLLQK		487.961	3	1460.86			619140					3813846
U	SGLTPLHLAAQEDR		503.267	3	1506.78							29178.1	7955077
N	GNTALHLASLAGQAEVVK		593.663	3	1777.97							42816.1	4961077
U	TLEQQENFEEVAR		796.881	2	1591.75			1.18224e+06					9040923
N	KGNTALHLASLAGQAEVVK		477.523	4	1906.06			3708200				18743.1	5594308
U	SKDLEVLEGKPLYVDCYGNLAPLTK	Carbamidomethyl	706.372	4	2821.46			1.49402e+06					5640462
U	LKQESNQLGPEGGLLSSTTVPLVQASFPEGALTK		874.969	4	3495.85			2.0216e+06					5742000
U	ELLVLR		371.745	2	741.475								5204923
U	SYTLNR		377.198	2	752.382								2836923
U	VSELLKK		408.763	2	815.512								116091
N	VMELLLK	Oxidation	431.259	2	860.504								998154
U	AHAASQLK	Acetyl	434.238	2	866.461								1928615
U	YLGPQDLK		467.256	2	932.497								1042554
U	SENGETWK		475.714	2	949.414								398738
U	LSFLKEPK		481.289	2	960.564								717523
N	LPALHLAAR		481.301	2	960.587								657538
U	SAADVLSTAK		481.761	2	961.508								306954
U	SAAALLSPLK		485.8	2	969.586								1544000
U	NANVNLSNK		487.257	2	972.499								4032154
U	AHAASQLKK	Acetyl	498.285	2	994.556								357815
U	SDANASYLR		498.741	2	995.467								3536769
U	KSDANASYLR		375.528	3	1123.56								1190569
U	KSDANASYLR		562.788	2	1123.56								635477
U	STLGASTTSSVK		569.801	2	1137.59								779923
N	KGFTPLHVAAK		390.233	3	1167.68								4370462
N	KGFTPLHVAAK		584.845	2	1167.68								239215
N	NGYTPLHLAAK		592.825	2	1183.63								245108
U	DGLTPLHCGAR	Carbamidomethyl	598.796	2	1195.58								454862
U	SSLTMTPPASPK		608.816	2	1215.62								497385
N	VRLPALHLAAR		406.259	3	1215.76								594462
N	ELLCVPYMAK	Carbamidomethyl+Oxidation	620.309	2	1238.6								581846
U	LVNFLLQHSAK		635.369	2	1268.72								1297631
U	SLWSVSTPSPLK		651.359	2	1300.7								1520738
U	ATFSPLVTVEPR		439.578	3	1315.71								1747846
U	QAAASHAPSLPER	Gln->pyro-Glu	659.331	2	1316.65								694400
U	YLVQDGAQVEAK		660.843	2	1319.67								1274385
N	DFPQYFAVVSR		443.559	3	1327.66								484246
U	NATTDALTSVLTK		445.577	3	1333.71								434723
U	NATTDALTSVLTK		667.862	2	1333.71								3547692
U	NDLTPLHVASKR		450.921	3	1349.74								198800
U	DCVSFTTNVSAR	Carbamidomethyl	678.814	2	1355.61								2982549
N	RLGYLSVVDTLK		455.27	3	1362.79								4833692
U	VKEETHLTTTTR		472.588	3	1414.74								330877
U	DLELNAEEETEK		710.328	2	1418.64								3644769
U	LEETMSVHDLMK		478.232	3	1431.67								636754
U	AKDDQTPLHLSAR		726.384	2	1450.75								157246
U	TRDGLTPLHCGAR	Carbamidomethyl	485.249	3	1452.73								399138
U	LDDEEPFKLVEK		487.921	3	1460.74								1385677
U	DPSKELAGLFEHK		490.924	3	1469.75								249815
U	EGHVEVVSELLQR		747.899	2	1493.78								1256754
U	EGHVEVVSELLQR		498.935	3	1493.78								13087077
U	SGLTPLHLAAQEDR		754.397	2	1506.78								502092
U	SGHEQVVEMLLDR		504.921	3	1511.74								8968462
U	SGHEQVVEMLLDR	Oxidation	510.252	3	1527.74								1582308
U	GGQQLVFNFYSFK		512.261	3	1533.76								1638308
U	GGQQLVFNFYSFK		767.888	2	1533.76								5219385
U	DLELNAEEETEKK		516.586	3	1546.74								1017954
U	DLELNAEEETEKK		774.375	2	1546.74								134435
U	ELNFSVDELNQLR		526.27	3	1575.79								1875077
U	ELNFSVDELNQLR		788.902	2	1575.79								5022769
U	TLEQQENFEEVAR		531.59	3	1591.75								1586923
U	VGLQAQPVPEETVKK		811.959	2	1621.9								827692
U	VGLQAQPVPEETVKK		406.483	4	1621.9								391369
U	VGLQAQPVPEETVKK		541.642	3	1621.9								21386154
U	LANPPPMVEGEGLASR		546.615	3	1636.82								1718923
U	LANPPPMVEGEGLASR		819.419	2	1636.82								1327554
U	LANPPPMVEGEGLASR	Oxidation	551.947	3	1652.82								249815
U	VALLLLDQGASPHAAAK		837.98	2	1673.95								1225677
U	VALLLLDQGASPHAAAK		419.494	4	1673.95								395246
U	VALLLLDQGASPHAAAK		558.989	3	1673.95								14322000
U	NRDLELNAEEETEK		845.4	2	1688.79								135497
U	NRDLELNAEEETEK		563.936	3	1688.79								1231108
U	VVTEELMTTTTLTEK		848.44	2	1694.86								1856308
U	VVTEELMTTTTLTEK		565.962	3	1694.86								179462
U	TLTTETRPQPHFNR		566.629	3	1696.86								321277
U	SGSLSSSPSNTPSASPLK		852.426	2	1702.84								1945231
U	VVTEELMTTTTLTEK	Oxidation	856.437	2	1710.86								210369
U	SGLTPLHVAAHYDNQK		438.477	4	1749.88								9459231
U	SGLTPLHVAAHYDNQK		584.301	3	1749.88								5235077
U	LVLEDAPKPCVPVGMK	Carbamidomethyl	584.984	3	1751.93								3429385
U	LVLEDAPKPCVPVGMK	Carbamidomethyl	876.973	2	1751.93								209015
U	LVLEDAPKPCVPVGMK	Carbamidomethyl+Oxidation	590.316	3	1767.93								557492
U	VENPNSLLSQSFMLLK		607.326	3	1818.95								3585846
U	MGYTPLHVGCHYGNLK	Carbamidomethyl	462.474	4	1845.87								4421231
U	MALVADHLGLSWTELAR		628.333	3	1881.98								4491846
U	MALVADHLGLSWTELAR	Oxidation	633.665	3	1897.97								820385
N	KGNTALHLASLAGQAEVVK		636.362	3	1906.06								3007692
U	VDKTLEQQENFEEVAR		645.653	3	1933.94								672877
U	GLPQTAVCNLNLTLPAHK	Carbamidomethyl	649.688	3	1946.04								3028615
U	GLPQTAVCNLNLTLPAHK	Carbamidomethyl	487.517	4	1946.04								380969
U	VENPNSLLSQSFMLLKK		650.024	3	1947.05								559585
U	VLDYLTNDLGSSSLTNLK		651.677	3	1952.01								662815
U	VLDYLTNDLGSSSLTNLK		977.012	2	1952.01								449292
U	GLPQTAVCNLNLTLPAHK	Propionamide	654.359	3	1960.06								222077
U	ELGDDSLPAEGYVGFSLGAR		1027	2	2051.98								3056769
U	ELGDDSLPAEGYVGFSLGAR		685.001	3	2051.98								1885846
U	NGVDVNLCNQNGLNALHLASK	Carbamidomethyl	751.046	3	2250.12								1927385
U	NQMDLATSLLEYGADANAVTR		751.699	3	2252.07								5892923
U	LDLVTLLEGPLFDYGNLSGTR		765.074	3	2292.2								5858308
U	EGHEDVAAFLLDHGASLSLTTK		578.545	4	2310.15								6528246
U	KNQMDLATSLLEYGADANAVTR	Oxidation	799.729	3	2396.16								938077
U	MTALLQTDVPEEKPFQTDLPR		810.418	3	2428.23								2014615
U	EGHEDVAAFLLDHGASLSLTTKK		488.656	5	2438.24								371231
U	EGHEDVAAFLLDHGASLSLTTKK		610.568	4	2438.24								484108
U	QGLASVHLAAQEGHVDMVSLLLSR	Gln->pyro-Glu	838.776	3	2513.31								42320000
U	QGLASVHLAAQEGHVDMVSLLLSR		633.59	4	2530.33								1281292
U	DLEVLEGKPLYVDCYGNLAPLTK	Carbamidomethyl	869.784	3	2606.33								1040831
U	LNRLDLVTLLEGPLFDYGNLSGTR		892.817	3	2675.43								5128308
U	SKDLEVLEGKPLYVDCYGNLAPLTK	Carbamidomethyl	941.493	3	2821.46								616108
U	SKDLEVLEGKPLYVDCYGNLAPLTK	Propionamide	709.875	4	2835.47								740738
U	TPSAPQSAESTGPKPLFHEVPLPPVLTETR		796.673	4	3182.66								627108
U	SGLTPLHLAAQEDRVNVAEVLVNQGAHVDAQTK		870.96	4	3479.81								1593231
U	SGLTPLHLAAQEDRVNVAEVLVNQGAHVDAQTK		696.97	5	3479.81								4210615
U	SFADENNVFHDPVDGWQNETPSGSLESPAQAR		876.145	4	3500.55								997862
U	VLVTNGANVNAQSQNGFTPLYMAAQENHLEVVR		896.953	4	3583.78								591123
U	FLLDNGASQSLATEDGFTPLAVALQQGHDQVVSLLLENDTK		1089.56	4	4354.2			1.82578e+06					5451692
U	QSFASLALR	Gln->pyro-Glu	488.267	2	974.519								2336154
U	QSFASLALR		496.78	2	991.545								1907077
U	EQHLTFTR	Glu->pyro-Glu	507.262	2	1012.51								235431
U	RQSFASLALR		574.83	2	1147.65								374754
U	LNLQEEEGSTR		638.312	2	1274.61								5777077
U	LRDTSQEPCGR	Carbamidomethyl	440.21	3	1317.61								509277
U	TEEPVSPLTAYQK		731.875	2	1461.74								2710154
U	AKPYFPESQNDLGK		531.935	3	1592.78								3626000
U	AKPYFPESQNDLGK		797.399	2	1592.78								221262
U	AAALLLQNDTNADVESK		591.639	3	1771.9								1377538
U	AAALLLQNDTNADVESK		886.955	2	1771.9								8027615
U	LTGGLLDRLDDSSDQAR		611.31	3	1830.91								1433200
U	YSYLTEPSMSPQSPCER	Carbamidomethyl	677.964	3	2030.87								562169
U	MNVPETMNEVLDMSDDEVRK		784.689	3	2351.04								264692
U	DSMMLEELLVPSKEQHLTFTR		626.819	4	2503.25								1974462
U	DSMMLEELLVPSKEQHLTFTR	Oxidation	630.817	4	2519.24								536508
U	SGFTPLHLAAHYGNLNVATLLLNR		864.806	3	2591.4								4835692
U	SGFTPLHLAAHYGNLNVATLLLNR		648.857	4	2591.4								26246154
U	ADLVQQLLQQGASPNAATTSGYTPLHLAAR		1031.54	3	3091.61								12682923
U	ADLVQQLLQQGASPNAATTSGYTPLHLAAR		773.909	4	3091.61								19873846
U	LTEVSQFFR		563.798	2	1125.58								410215
U	KLPDSNSFTK		568.801	2	1135.59								270862
U	LNDELQSPEK		586.793	2	1171.57								130755
U	SGAQFFTLEGR		606.804	2	1211.59								373723
U	GNQAEPTEVLLR		663.854	2	1325.69							22876.1	718769
U	TLPVYVSFVQVGK		718.911	2	1435.81								356415
U	SYVSAAPSAFQSLR		495.256	3	1482.75								484785
U	SYVSAAPSAFQSLR		742.381	2	1482.75								1862308
U	SAMSPDVAK		453.223	2	904.432
U	TEVVHVLR		476.782	2	951.55
U	DSMMLEELLVPSK		746.375	2	1490.74
U	EGHEDVAAFLLDHGASLSLTTK		771.057	3	2310.15
U	MTALLQTDVPEEKPFQTDLPR	Oxidation	815.749	3	2444.23
U	QGLASVHLAAQEGHVDMVSLLLSR	Gln->pyro-Glu+Oxidation	844.108	3	2529.3
	MYH10_MOUSE|Q61879	Myosin-10
N	TVGQLYK		404.732	2	807.449			24304000		121560		16842.1	472754
N	LVFQEFR		469.758	2	937.502			31200000		179830		19562.1	475569
N	LDPHLVLDQLR		440.254	3	1317.74	50182.1		17834200		112810			449631
U	LGQLEEQLEQEAKER		600.643	3	1798.91	74058.1		54904000		223470	311340		193585
U	SALLDEKR		466.264	2	930.513	229840		14791600	1231100	1343100		2043530	270800
N	QRYELLTPNALPK	Gln->pyro-Glu	763.422	2	1524.83			19173400		78768.1			250708
U	QEEELQAKDEELLK	Gln->pyro-Glu	842.917	2	1683.82			33624000		78668.1			378108
N	QKLQLEK	Gln->pyro-Glu	435.258	2	868.502			9007600		53921.1			81802.1
U	ALEEALEAKEEFER		555.277	3	1662.81			43792620		215820			347077
U	ASRDELFAQSK		417.882	3	1250.63			24668000		102270			220662
U	KLDAQVQELHAK		460.593	3	1378.76			25328000		67053.1			184738
U	LQELEGAVK		493.779	2	985.544			28870000		158110			403938
N	NTNPNFVR		481.246	2	960.478			14955600		82937.1			223169
U	QVLALQSQLADTK		707.899	2	1413.78			6232800		43337.1			57483.1
U	ELDDATEANEGLSR		760.347	2	1518.68			31018000		99945.1			157277
U	LGQLEEQLEQEAK		757.888	2	1513.76			17187000		105180			373446
U	QLLQANPLLESFGNAK	Gln->pyro-Glu	863.462	2	1724.91			70948000		235450			1.40917e+06
N	ADFCLLHYAGK	Carbamidomethyl	432.213	3	1293.62			15228600		58377.1			273292
U	KTTLQVDTLNTELAAER		635.009	3	1902.01			12268600		43085.1			199585
U	LDAQVQELHAK		417.895	3	1250.66			5606600		23644.1			59277.1
N	AGVLAHLEEER		408.551	3	1222.63			22088000		89327.1			557923
N	EQADFAVEALAK		646.33	2	1290.65			29192000		3941700			452077
U	KEEELQGALAR		415.226	3	1242.66			28348000			4.0221e+06		372738
U	FVAELWK		446.75	2	891.485			4018000					184200
U	TGLEDPER		458.722	2	915.43			7108800					139665
U	QKLNLSSR	Gln->pyro-Glu	464.764	2	927.514			5602400	20857.1
N	QLVSNLEK		465.766	2	929.518			7088400					72375.1
U	NQLLQNEK		493.767	2	985.519			967560					148532
N	VKPLLQVTR		527.343	2	1052.67			5869000					37948.1
N	FDQLLAEEK		546.782	2	1091.55			7849200					146612
N	ALELDPNLYR		602.322	2	1202.63			37968000		232810
N	KFDQLLAEEK		610.83	2	1219.64			28836000		101690
U	VEGELEEMER		610.777	2	1219.54			11806200					134354
N	KFDQLLAEEK		407.556	3	1219.64			15321800		62273.1
U	ELEAELEDER		616.786	2	1231.56			7291600					168062
U	ALEQQVEEMR		616.801	2	1231.59			19384800					268923
U	KEEELQGALAR		622.336	2	1242.66			6070600					68272.1
N	YELLTPNALPK		629.856	2	1257.7			8929000					114085
U	LLKDVEALSQR		424.582	3	1270.72			10086400					217015
U	QLEEAEEEATR	Gln->pyro-Glu	644.289	2	1286.56			9577400		50398.1
U	QLEEAEEEATR		652.802	2	1303.59			7299600					59285.1
N	DDVGKNVHELEK		461.569	3	1381.68			3837600					44008.1
N	VDYKADEWLMK		466.564	3	1396.67			11337200					136918
U	QVLALQSQLADTK	Gln->pyro-Glu	699.385	2	1396.76			9176400					160569
U	SDLLLEGFNNYR		720.859	2	1439.7			23858000					355954
U	DLQTRDEQNEEK		502.234	3	1503.68			7828200					65482.1
U	VVSSVLQFGNLSFK		508.952	3	1523.83			1794680					64614.1
U	VVSSVLQFGNLSFK		762.925	2	1523.83			8653400					139434
U	QVLALQSQLADTKK	Gln->pyro-Glu	763.433	2	1524.85			10616200					117975
U	NKQEVMLSDLEER		530.931	3	1589.77			12177200					106882
N	AGKLDPHLVLDQLR		525.639	3	1573.89			3320600		28269.1
N	AGVLAHLEEERDLK		527.286	3	1578.84			22264000		74185.1
U	ADMEDLMSSKDDVGK		547.576	3	1639.71			5878000					109634
U	AVLYNPATQADWTAK		824.92	2	1647.83			8707400					107375
U	VVSSVLQFGNLSFKK		551.651	3	1651.93			17371200					102445
U	KQELEELLHDLESR		580.304	3	1737.89			6851400		41962.1
U	TTLQVDTLNTELAAER		592.311	3	1773.91			10084800					163492
U	KMEEEVLLLEDQNSK		602.305	3	1803.89			6804800					83909.1
U	LQQELDDLTVDLDHQR		646.657	3	1936.95			59250000			2.0778e+07		825323
N	TQLEELEDELQATEDAK		654.644	3	1960.91			13132000					365831
U	ELQAQLAELQEDFESEK		669.657	3	2005.95			28718000					231923
U	SLEAELLQLQEELASSER		682.351	3	2044.03			134672000					1.35542e+06
U	VEDMAELTCLNEASVLHNLKDR	Carbamidomethyl	640.065	4	2556.23			12691400					137334
U	DLSEELEALKTELEDTLDTTAAQQELR		766.132	4	3060.5			52674000					477800
U	KLMEDR		396.208	2	790.401			255460
N	KLQAQMK		423.747	2	845.479			795800
N	ADEWLMK		446.715	2	891.416			2316200
N	QLVSNLEK	Gln->pyro-Glu	457.253	2	912.492			4232600
U	QQQLSALK		458.267	2	914.519			1870120
U	DVEALSQR		459.238	2	916.461						52195.1	39790.1
U	LRVELAEK		479.29	2	956.565			3996000
U	GGPLSFSSSR		497.751	2	993.488			13037600
N	CNGVLEGLR	Carbamidomethyl	509.261	2	1016.51			4794200
U	HQQLLEEK		512.775	2	1023.53			4177000
U	ATDKTFVEK		519.777	2	1037.54			1380740
N	QLVSNLEKK	Gln->pyro-Glu	521.301	2	1040.59			5738600
U	LEVNMQAMK	Oxidation	540.265	2	1078.52			1358960
U	RGGPLSFSSSR		384.204	3	1149.59			2330000
U	RGGPLSFSSSR		575.802	2	1149.59			3846400
U	KHQQLLEEK		576.822	2	1151.63			760380
U	AMVNKDDLQK		581.3	2	1160.59			1317580
U	AMVNKDDLQK	Oxidation	393.201	3	1176.58			1057460
U	DHNLPGELER		393.863	3	1178.57			3714200
U	DHNLPGELER		590.291	2	1178.57			1527920
U	AKLQELEGAVK		395.899	3	1184.68			8079600
U	VEGELEEMER	Oxidation	618.774	2	1235.53			1486240
U	ALEQQVEEMR	Oxidation	624.798	2	1247.58			2004800
U	ASRDELFAQSK		626.32	2	1250.63			3475000
U	LLKDVEALSQR		636.369	2	1270.72			2320400
U	LRLEVNMQAMK		444.909	3	1331.71			3413000
U	VEGELEEMERK		450.219	3	1347.63			3019800
U	ELEAELEDERK		680.833	2	1359.65			2512400
U	FVAELWKDVDR		459.91	3	1376.71			5238200
U	HADQYKEQMEK		469.55	3	1405.63			5017600
U	DVEALSQRLEEK		708.87	2	1415.73			2958200
U	TSDVNDTQPPQSE		709.308	2	1416.6			857960
N	VLQYLAHVASSHK		484.937	3	1451.79			25290000
U	GDDETLHKNNALK		485.579	3	1453.72			4214600
N	DKADFCLLHYAGK	Carbamidomethyl	513.254	3	1536.74			7502000
N	DKADFCLLHYAGK	Carbamidomethyl	385.192	4	1536.74			3103200
U	QVLALQSQLADTKK		514.967	3	1541.88			4701800
N	EDQSLLCTGESGAGK	Carbamidomethyl	776.351	2	1550.69			2378400
U	QTKVEGELEEMER	Gln->pyro-Glu	780.864	2	1559.71			3238800
N	AGKLDPHLVLDQLR		394.481	4	1573.89			3175000
N	AGVLAHLEEERDLK		395.716	4	1578.84			5600800
N	KVLQYLAHVASSHK		395.978	4	1579.88			3260600
U	NKQEVMLSDLEER		795.893	2	1589.77			3994000
U	LAECSSQLAEEEEK	Carbamidomethyl	811.864	2	1621.71			1269280
U	NTDQASMPENTVAQK		817.378	2	1632.74			6126600
U	VDDDLGTLESLEEAK		817.394	2	1632.77			1753480
U	ALEEALEAKEEFER		832.412	2	1662.81			5457800
U	MEEEVLLLEDQNSK		559.606	3	1675.8			4647000
U	MEEEVLLLEDQNSK		838.906	2	1675.8			6835200
U	TGLEDPERYLFVDR		570.621	3	1708.84			6169200
U	QGLETDNKELACEVK	Carbamidomethyl+Gln->pyro-Glu	858.909	2	1715.8			13361800
U	LCHLLGMNVMEFTR	Carbamidomethyl	574.283	3	1719.83			10489200
U	QGLETDNKELACEVK	Carbamidomethyl	578.617	3	1732.83			6939600
U	KQELEELLHDLESR		435.48	4	1737.89			2188600
U	QLLQANPLLESFGNAK		871.975	2	1741.94			5654000
U	NLPLYSENLLEMYR		877.943	2	1753.87			10197000
U	KVDDDLGTLESLEEAK		587.963	3	1760.87			12472200
U	TTLQVDTLNTELAAER		887.963	2	1773.91			21750000
U	HATALEELSEQLEQAK		599.639	3	1795.9			8008800
U	LAECSSQLAEEEEKAK	Carbamidomethyl	607.956	3	1820.85			25300000
U	LAECSSQLAEEEEKAK	Propionamide	612.628	3	1834.86			4796000
U	VEEEEERNQLLQNEK		629.641	3	1885.9			9008400
U	HATALEELSEQLEQAKR		651.673	3	1952			25462000
U	HATALEELSEQLEQAKR		489.006	4	1952			3198000
U	TFHLFYQLLSGAGEHLK		491.012	4	1960.02			16146400
U	TFHLFYQLLSGAGEHLK		654.347	3	1960.02			8446400
N	TQLEELEDELQATEDAK		981.463	2	1960.91			9639800
U	ELQAQLAELQEDFESEK		1003.98	2	2005.95			8443600
U	ALEDETKNHEAQLQDMR		676.653	3	2026.94			7567000
U	SLEAELLQLQEELASSER		1023.02	2	2044.03			44660000
U	LQNELDNVSTLLEEAEKK		691.695	3	2072.06			26468000		86635.1
U	LVGLDQVTGMTETAFGSAYK		1044.52	2	2087.02			29762000
U	LVGLDQVTGMTETAFGSAYK		696.682	3	2087.02			38072000
U	NMDPLNDNVATLLHQSSDR		714.008	3	2139			10837400
U	HAEQERDELADELANSASGK		724.005	3	2168.99			11216600
N	TQLEELEDELQATEDAKLR		744.373	3	2230.1			6579200
U	MQAHLQDLEEQLDEEEGAR		747.674	3	2240			27024000
U	MQAHLQDLEEQLDEEEGAR	Oxidation	753.006	3	2256			3908600
U	KMQAHLQDLEEQLDEEEGAR		593.031	4	2368.1			7170800
N	LNFDVTGYLVGANLETYLLEK		1186.62	2	2371.23			20389400
N	LNFDVTGYLVGANLETYLLEK		791.418	3	2371.23			6130200
U	DAAGLESQLQDTQELLQEETR		792.05	3	2373.13			72500000
U	NLLAEQLQAETELFAEAEEMR		812.397	3	2434.17			45466000
U	QLEEEKNSLQEQQEEEEEAR	Gln->pyro-Glu	820.033	3	2457.08			2656400
N	LQQLFNHTMFLLEQEEYQR		823.074	3	2466.2	47144.1		26048000
N	LQQLFNHTMFLLEQEEYQR	Oxidation	828.406	3	2482.2			3488000
U	LAQLEEELEEEQSNMELLNDR		844.73	3	2531.17			27162000
U	DLSEELEALKTELEDTLDTTAAQQELR		1021.17	3	3060.5			66258000
N	NCAAYLK	Carbamidomethyl	420.208	2	838.401
U	ATLSALEAK		452.261	2	902.507
U	VSEGDRLR		466.251	2	930.488
U	EEELQGALAR		558.288	2	1114.56
U	KHQQLLEEK		384.884	3	1151.63
U	AKLQELEGAVK		593.345	2	1184.68
U	NTDQASMPENTVAQK	Oxidation	825.375	2	1648.74
	SRCN1_MOUSE|Q9QWI6	SRC kinase signaling inhibitor 1
U	VEVEAVK		387.224	2	772.433	127590	40723.1	52636000	79635.1	261910	133390	119450	341400
U	LQLQNQESVR		607.828	2	1213.64	135970	58699.1	84664000	80690.1	377940	146540	152690	390831
U	DVKPDEDLAGK		396.203	3	1185.59	113000	15048.1	54326000	60006.1	135570	97865.1	90212.1	433662
U	HTQGAQPGLADQAAK		498.255	3	1491.74	141260		68928000	73629	136290	105360	84559.1	333169
U	NVFYELEDVRDLQDR		637.646	3	1909.92	371740		171041540	189700	524590	363120	266850	762908
U	LLEETQAELLK		643.864	2	1285.71	474490	135070	178578000	295340	761750	367390		1045215
U	TGEVVVTSK		460.258	2	918.502	110320		33638000	36649.1	177200	73868.1	47157.1	289138
U	GVTDTLAQLR		537.301	2	1072.59	258690		94332000	173650	468980	214800	249640	770923
U	AALTQYSAK		476.759	2	951.503	265610		81908000	120380	336160	142030	137180	497462
U	TSLPVLTSFGAR		624.851	2	1247.69	66474.1		31800000	54780.1	220710	70826.1	89354.1	199600
U	QSLPLSR		400.735	2	799.455	52051.1		14923600	32390.1	120440	40334.1	42893.1	74672.1
U	LADVSAPSGGPPPPHSPYSGPPSR		776.385	3	2326.13	172940		34340000	50854.1	120240	78609.1	58546.1	181462
U	LSLAAAAGDPFAYPGAGGLYK		670.683	3	2009.03	179010		41314000	83482.1	156090	104410	114190	349431
U	LGGAPTGQGVSPSPSALLER		632.006	3	1893	107840	48948.1	29042000		168430	95225.1	114280	300892
U	TLVEEER		438.227	2	874.44	190420	82421.1	30646000	104530	195400		151290	521292
U	LSLAAAAGDPFAYPGAGGLYK		1005.52	2	2009.03	154580		61576000	51173.1	141390	80724.1	92647.1
U	GQLQQLR		421.746	2	841.477			57434000	211380	366150	234760	290930	570692
U	RDVKPDEDLAGK		448.237	3	1341.69	90244		60632000	54306.1	174110		57079.1	198000
U	SLVGFGPPVPAK		584.84	2	1167.67			26488000	66597.1	125000	67736.1	89775.1	168569
U	LVPGPELEEK		555.806	2	1109.6	317000		145730000	220240	622860	281510		889892
U	RQEDPLQR		521.275	2	1040.54	53464.1		22180000		62805.1	38849.1	40580.1	58020.1
U	RGSDELTVPR	Phospho	605.285	2	1208.56	133290		41106000		133240	45009.1	73707	147011
U	DAFMDHLK		488.731	2	975.448	40723.1		39764000	29787.1	32123.1		31610.1	235538
U	VAAETDFSK		484.24	2	966.466	79827.1		48700000	101670	234500	143240	170670
U	SPNTALLLKDEAR		476.6	3	1426.78	260950	78951.1	143408000		367600	206500		540923
U	LGGAPTGQGVSPSPSALLER		947.505	2	1893	278870	63318.1	62130000		311470		139600	316923
U	TEAELSMR		468.726	2	935.438	41945.1	25137.1	39088000		58039.1	93673.1		257785
U	AGAGGPLYGDGYGFR		729.344	2	1456.67	230560		8171400	122920		183900	158660	553692
U	KVAAETDFSK		548.288	2	1094.56	47236.1		21394000	16082.1			21499.1	94603.1
U	GLQNSASDLR		530.773	2	1059.53	308080		108974000	236210	528230		347570
U	QLASLTGLVQSALLR	Gln->pyro-Glu	776.956	2	1551.9	464760		215920000		1127400	543210	725470
U	FSNVGLVHTSER		449.233	3	1344.68	147520		60856000		193730		112790	422431
U	SPGVLFLQFGEETRR		579.309	3	1734.91	214140		88439880		255860	146660		495154
U	SLVGFGPPVPAKDTETR		590.984	3	1769.93			56430000	54424.1	221910	115120		188138
U	KLQLQNQESVR		448.253	3	1341.74	269070	61888.1	96032000		453300	175760	159250
U	YLNDEELLTQQLNDLEK		693.348	3	2077.02	1.2885e+06		255440000		956080	657060		659846
U	AVSVEAAER		466.246	2	930.477			6634600	32057.1	63144.1		49541.1	124595
U	NVFYELEDVR		642.317	2	1282.62			9380000	47572.1	132250		54492.1	196385
U	GSDELTVPR		487.251	2	972.488			19899600		77165.1		31401.1	138954
U	SKYPQHALALR		428.579	3	1282.71	75450.1		30144000		77502.1	45023.1
U	FALAWWER		539.777	2	1077.54	50352.1		12948200		49604.1	32405.1
U	DSGSSSVFAESPGGK		706.32	2	1410.63			40136000		100860		58841	198938
U	TLVEEERLR		382.216	3	1143.62	66196.1		87046000		340900	64409.1
U	RGSDELTVPR		565.302	2	1128.59			20698000		74844.1	38900.1		81691.1
U	SPGVLFLQFGEETR		790.409	2	1578.8	131130		40824000	63435.1				286862
U	GEGLYADPYGLLHEGR		582.953	3	1745.84		137990	151668000		502710			1151138
U	EMVYASR		428.205	2	854.396	29038.1		15596600			45980.1		158585
U	NVFYELEDVRDLQDR		955.966	2	1909.92			21756000		46024.1	40713.1		411677
U	SPNTALLLK		478.792	2	955.57			14913200		95268.1			143675
U	ALPDLDCASK	Carbamidomethyl	545.266	2	1088.52		77700.1	63478000					278185
U	HTVLAAQSLEALSGLQK		589.332	3	1764.97			84513240			108510		342800
U	RGSDELTVPR		377.204	3	1128.59			14771400		66164.1			82006.1
U	DVKPDEDLAGK		593.801	2	1185.59	26253.1		16295600		55395.1
U	QLGETLTELK	Gln->pyro-Glu	557.803	2	1113.59			50690000		188180			228754
U	LTMGMLK		397.219	2	792.424			22810000	12190.1				194046
U	AGGMVLVK		387.731	2	773.447			40210000		57267.1			355646
U	QSLPLSR	Gln->pyro-Glu	392.222	2	782.429			10379800		43834.1			126020
U	VVLRVEVEAVK		414.259	3	1239.76			6548900		71594.1	30995.1
U	GLQNSASDLRGQLQQLR		628.673	3	1883			55312000		317280			73342.1
U	KLQLQNQESVR		671.875	2	1341.74			12899000		56725.1			54588.1
U	KDSVFLK		418.747	2	835.48			17721200		75828.1
U	LQMQLHLR		519.797	2	1037.58			10720200		31413.1
U	FLKEEPQR		523.785	2	1045.56			4303200					17282.1
U	TLVEEERLR		572.82	2	1143.62			26902000		73098.1
U	AESEELEVQKPQVK		538.618	3	1612.83			23786000	32650.1
U	KAESEELEVQKPQVK		436.239	4	1740.93			25666000		73246.1
U	KAESEELEVQKPQVK		581.316	3	1740.93			32484000		108390
U	KAESEELEVQKPQVK	Phospho	607.971	3	1820.89			11185600		45023.1
U	LRSPGVLFLQFGEETR		617.004	3	1847.99			11519600		45677.1
U	LGGAPTGQGVSPSPSALLERR		684.04	3	2049.1			9288600		60895.1
U	LADVSAPSGGPPPPHSPYSGPPSRGSPVR	Phospho	726.601	4	2902.38			7849600		55997.1
U	AGGMVLVK	Oxidation	395.728	2	789.442			4890000
U	LTMGMLK	Oxidation	405.217	2	808.419			3509600
U	LTMGMLK	Oxidation+Oxidation	413.214	2	824.414			1454240
U	SPPPPPPR		422.737	2	843.46			2470200
U	LPPSSPQK		427.243	2	852.471			3322000
U	QEDPLQR	Gln->pyro-Glu	434.712	2	867.409			3102400
U	QRTEYMR	Gln->pyro-Glu+Oxidation	491.724	2	981.434			475800
U	AHFPGLQSK		492.767	2	983.519			15172000
U	DAFMDHLK	Oxidation	496.729	2	991.443			1801400
U	ERMEAMEK		512.233	2	1022.45			1080960
U	TGEVVVTSKK		524.306	2	1046.6			11403200
U	GSEPETPSEK		530.743	2	1059.47			576960
U	YPQHALALR		534.801	2	1067.59			3382000
U	RAALTQYSAK		554.809	2	1107.6			7703800
U	RAALTQYSAK		370.208	3	1107.6			1713020
U	MQPWQCLR	Acetyl+Carbamidomethyl	580.771	2	1159.53			4019600
U	GVTDTLAQLRR		615.352	2	1228.69			4632600
U	SKYPQHALALR		642.365	2	1282.71			2265000
U	LQAQQQATKPSK		443.249	3	1326.73			14051000
U	LQAQQQATKPSK		664.37	2	1326.73			616600
U	NTDKAVSVEAAER		463.904	3	1388.69			1488480
U	SPNTALLLKDEAR		714.396	2	1426.78			16119000
U	DSGSSSVFAESPGGK	Phospho	746.304	2	1490.59			2596200
U	HTQGAQPGLADQAAK		746.879	2	1491.74			6430400
U	RFSNVGLVHTSER		501.267	3	1500.78			38054000
U	FSNVGLVHTSERR		376.202	4	1500.78			30482000
U	QLASLTGLVQSALLR		523.982	3	1568.92			47946000
U	QLASLTGLVQSALLR		785.47	2	1568.92			118100000
U	THPGPAPTPDHKPPK		526.279	3	1575.82			3899200
U	AESEELEVQKPQVK		807.423	2	1612.83			1349140
U	SSPPMLSADDAEYPR		818.37	2	1634.72			7580000
U	KDSGSSSVFAESPGGK	Phospho+Phospho	850.334	2	1698.65			936920
U	SPGVLFLQFGEETRR		868.46	2	1734.91			7170400
U	KAESEELEVQKPQVK		871.47	2	1740.93			1428460
U	GEGLYADPYGLLHEGR		873.926	2	1745.84			12420400
U	HTVLAAQSLEALSGLQK		883.494	2	1764.97			8439800
U	SLVGFGPPVPAKDTETR		885.973	2	1769.93			3245800
U	GLQNSASDLRGQLQQLR		942.506	2	1883			3027800
U	RHTVLAAQSLEALSGLQK		481.276	4	1921.07			11379000
U	EPLYAAFPGSHLTNGDLR		653.33	3	1956.97			4920200
U	EVSGPNETSSPGSEKPSGSR		663.643	3	1987.91			22182000
U	EVSGPNETSSPGSEKPSGSR	Phospho	690.299	3	2067.87			3296400
U	YLNDEELLTQQLNDLEK		1039.52	2	2077.02			177780000
U	THPGPAPTPDHKPPKAPHGQK		439.835	5	2194.14			4732400
U	THPGPAPTPDHKPPKAPHGQK		549.542	4	2194.14			2066000
U	LSYAGGRPPSYAGSPVHHAAER		760.714	3	2279.12			3650600
U	LSYAGGRPPSYAGSPVHHAAER	Phospho	787.369	3	2359.09			3098400
U	LSYASAESLETMSEAELPLGFSR		830.069	3	2487.18			2.6824e+07
U	LSYASAESLETMSEAELPLGFSR	Oxidation	835.4	3	2503.18			5157800
U	SSGATPVSGPPPPSASSTPAGQPTAVSR		850.093	3	2547.26			27944000
U	VHLTHEVSSLDTLHALLAHMFPQK		545.692	5	2723.42			66506000
U	GLDFELPPPSPPLNLHELSGPAEGTPLTPK		1040.88	3	3119.62			93754000
U	LNNLSPASHLASSSPPPGLPSGLPSGLPSGSPSR		809.673	4	3234.66			6727400
U	LNNLSPASHLASSSPPPGLPSGLPSGLPSGSPSR		1079.23	3	3234.66			9623400
U	LQAQQQATKPSKEVSGPNETSSPGSEKPSGSR		660.332	5	3296.62			2162600
U	RLNNLSPASHLASSSPPPGLPSGLPSGLPSGSPSR		848.698	4	3390.76			23284000
U	TEAELSMR	Oxidation	476.724	2	951.433			3109800
U	GQLQQLRK		485.793	2	969.572			2090000
U	RTEAELSMR		546.777	2	1091.54			29492000
U	RTEAELSMR	Oxidation	554.774	2	1107.53			1036460
U	RTEAELSMR	Oxidation	370.185	3	1107.53			589500
U	EQQPNYWSFK		663.809	2	1325.6			6693200
U	MREQQPNYWSFK	Oxidation	543.921	3	1628.74			4295200
U	SLSTYSAAALQSDLEDSLYK		721.355	3	2161.04			92994000					279585
U	SLSTYSAAALQSDLEDSLYK		1081.53	2	2161.04			221540000
U	QRTEYMR	Gln->pyro-Glu	483.727	2	965.439
U	SFPSSHGLTTTR		645.825	2	1289.64
U	RDVKPDEDLAGK		671.852	2	1341.69
U	FSNVGLVHTSER		673.347	2	1344.68
U	EPLYAAFPGSHLTNGDLRR		529.275	4	2113.07
U	LSLAAAAGDPFAYPGAGGLYKR		722.716	3	2165.13			8884800
	CAC1A_MOUSE|P97445	Voltage-dependent P/Q-type calcium channel subunit alpha-1A
N	QSFQYR		414.704	2	827.393	169380	60071.1	2620400	76801	121170	263670	60091.1	141488
U	DSSLLGPHHLDEYVR		579.957	3	1736.85	1935600	572720	31862000	789760	1588000	3464700	891860	1886615
N	ACLDFALSAKPLTR	Carbamidomethyl	521.617	3	1561.83	1464700	579720	20054000	701520	804810	2522500	682130	1553077
U	DSSLLGPHHLDEYVR		435.219	4	1736.85	1067200	386240	13855000	390560	668380	1.7524e+06	457520	1.25494e+06
U	TLDLLVTPHK		379.561	3	1135.66	999410	279160	17152000	590740	853770	2071900	657950	1236154
U	TLDLLVTPHK		568.837	2	1135.66	299190	85199.1	4727600	164430	229170	557510	170260	218831
U	YGAGGGGSGPAAGVVVGAAGGR		872.94	2	1743.87	455570	245910	6206800	262120	279970	1182800	207020	485492
U	YGAGGGGSGPAAGVVVGAAGGR		582.296	3	1743.87	275890	211800	4.0388e+06	196760	209430	760730	187250	384985
U	STDLTVGK		410.724	2	819.434	372730	113320	5275600	159300	268390	788270	182490	517738
U	VLSPPLGLGK		490.811	2	979.607	219660	84622.1	2.7416e+06	159720	172880	458320	177490	315692
U	EALYGDAAER		547.759	2	1093.5	1434500	636370	12788200	532630	597570	2984700	866730	1635077
N	SVWEQR		402.704	2	803.393	810330	312120	6.863e+06	264920	343620	1.5557e+06	346140	739292
U	QQMDAELRK	Gln->pyro-Glu	551.271	2	1100.53	146290	56577.1	4215400	91251.1	86676.1	527810	134550	320077
U	QNCLTVNR	Carbamidomethyl	502.751	2	1003.49	284540	112030	3561400	82790.1	172070	783050	100560	303877
U	QNCLTVNR	Carbamidomethyl+Gln->pyro-Glu	494.237	2	986.46	515780	230070	4.6936e+06	177990	203630	1193100	171070	475554
U	ELNGYMEWLSK		685.326	2	1368.64	441390	108070	4929600	120130	97818.1	1337500	166100	457523
U	RLDDYSLER		583.794	2	1165.57	1491000	643760	23494000	648830	824000	2843300	823470	726169
U	KQNLLASR		465.28	2	928.545	420950	133540	4.581e+06	146380	179510	906840	144940	231431
U	FGDEMPGR	Oxidation	462.698	2	923.381	121350	50669.1	1321680	84294	63326.1	288430	138890	160800
U	SASVLGPK		379.724	2	757.433	439220	223630	9.6703e+06	221317	383435	837850	41786.1	691262
U	AEEVLLAEDETDVEQR		923.439	2	1844.86	513210	159200	3212000	209500	180060	947640	367980	581600
U	YAQERPDTGR		398.195	3	1191.56	295900		7.8666e+06	137095	179820	550210	53552	465846
N	LLLWTFVQSFK		691.398	2	1380.78	2295900		4.081e+07	1386100	1295900	3302700	1658700	2746308
U	HSVDATFENQGPSPGYR		621.287	3	1860.84	274940		5160800	117150	201810	365950	206850	362369
U	LDDYSLER		505.743	2	1009.47	218030	81581.1	3968600	134640	193110	513810		221908
U	NANPDPLPK		483.256	2	964.498	305150		5237200	190620	228620	671710	243280	304769
U	GNDLSTLSDTSPMKR		541.267	3	1620.78	128900	79318.1	4702800	60921.1	48837.1	356430		263154
N	YWASLR		398.211	2	794.408	218010		5383600	111880	163520	765770	119240	334369
U	FFHCTDESK	Carbamidomethyl	390.834	3	1169.48	91352.1	42156.1	4375600	61922.1	84061.1	216220		245415
U	LGNSTNPGPALATNPQNAASR		684.347	3	2050.02	506760	202060	7803400	371960	363390	1008400	351210
U	ENQGSGVPVSGPNLSTTRPLQQDLGR		903.13	3	2706.37	347790	124760	5486600	143420	173490	543230	149890
U	RTPNNPGNPSNPGPPK		548.613	3	1642.82	255330	95853.1	4169000	115500		586600	138810	242000
U	AEEVLLAEDETDVEQRHPFDGALR		685.586	4	2738.31	807870	229590	10950200	286360	401890	1471800		830231
U	SLFLFSEDNVVR		713.372	2	1424.73	2099800		24040000	882590	1201000	5611600	1314300	2748462
U	LENSTFFHK		374.857	3	1121.55	441360		6803800	280100	266590	1419200	397000	834354
U	HPFDGALR		456.738	2	911.461	414000		3981600	210000	191620	975980	315320	393569
U	TFFQALMLLFR		693.884	2	1385.75	478160		4933800	204620	270110	710490	304530	727200
U	THLDRPLVVDPQENR		596.983	3	1787.93	1019800		6661000	260020	507220	1569500	324280	456615
N	QQQLER	Gln->pyro-Glu	392.701	2	783.388	132210		962860	65657	69345	235010	103750	203431
U	KQNLLASR	Phospho	505.263	2	1008.51	123410		848240	71174.1	38045.1	177290	82318	147212
N	TMALYNPLPVR	Oxidation	645.847	2	1289.68	564480		5055200	575200	368850	1200400	736920	525154
U	TPLMFQR	Oxidation	454.737	2	907.458	224280	99037.1	2.6006e+06	628010	174700	446420	1396300	143252
N	VWAEYDPAACGR	Carbamidomethyl	697.811	2	1393.61		231560	5312200	212780	269830		221350	326923
U	YLLYEK		414.729	2	827.443			7297200	351590	256710	802390	286280	482031
U	TPENSLLVTNPSSTQPNSAK		695.687	3	2084.04			4336400	186230	148680	423720	145720	252615
N	AVFDCVVNSLK	Carbamidomethyl	626.324	2	1250.63			6736000	159570	208590	374660	256320	277046
U	FYGASVAYENALR		730.862	2	1459.71			6960000	133470	238390	337880	184260	320938
U	LCHYLLNLR	Carbamidomethyl	401.222	3	1200.64			6111600	151070	312380	753680	172050	438062
U	MMEEYSLEK		580.254	2	1158.49	129360		5616800		48343.1	666020	73243	461108
U	LENSTFFHKK		417.556	3	1249.65	249200	107530	4.8074e+06		142650	730510		348954
U	TPNNPGNPSNPGPPK		744.365	2	1486.72	159660		2223200	60730.1	67588.1	270850		101522
U	EMMALWPNLSQK		724.357	2	1446.7	70114.1		3129200	93991.1		388330	102960	232015
U	SLFLFSEDNVVRK		518.616	3	1552.82	482790		9.5172e+06		466550	1370400	172030	730646
U	DMYSLLR		449.229	2	896.443	105250	33944.1	2.8326e+06		47623.1	331610		240692
U	MMEEYSLEK	Oxidation	588.252	2	1174.49	28706.1		929780	40256.1		83419.1	53788.1	67008.1
U	DEQEEEEAANQK		710.297	2	1418.58	180920		1988840	64194.1		381800	78520.1	215738
N	LVSGLPSLQVVLK		676.929	2	1351.84			10860400	504860	529350	1752500	569170	672108
U	TDLLNPEEAEDQLADLASVGSPFAR		886.768	3	2657.28	2.3237e+06	591240	24368000		1.0201e+06	3.2131e+06		967723
N	LVSGLPSLQVVLK		451.622	3	1351.84	93255.1		1228700		44383.1	235310	107050	139058
N	TMALYNPLPVR		637.85	2	1273.69	901060	387150	19373400		326160	4066500		2071077
U	RRPGDEPDDRPER		399.447	4	1593.76	140730		2.885e+06	73985.1		377130	89129.1	214723
U	TPENSLLVTNPSSTQPNSAK		1043.03	2	2084.04	125000		1.52118e+06	56432	58760.1	158900	48977	53340.1
U	LPAENQR		414.222	2	826.43	58064.1		1325820	110160		176490	128020	265677
U	TPLMFQR		446.739	2	891.464	455770		11204000		192390	1399900		770385
U	GADYTEPDSPR		604.265	2	1206.52			1300120	43775.1		157110	65071.1	90462
U	QGSSSVSGSPAPSTSGTSTPR	Gln->pyro-Glu	959.443	2	1916.87	118770		1994540		101690	225170	72291
U	AKEVAEVSPLSAANMSLAVK	Phospho	699.022	3	2094.04	257120		5263600	146430		996870	113840
U	FGDEMPGR		454.7	2	907.386		124100	7303600	95395.1		1476000		928354
U	MAGPAAPPGGSPR	Oxidation	591.29	2	1180.57	93565.1		1063720	75446.1		194470		53195.1
U	QNLLASR		401.232	2	800.45	65994.1		871040		64046.1	206550	34704.1
U	VWAEYDPAAWGR		710.836	2	1419.66	366030	186160	4.8992e+06		233380	960960	122510	277338
U	AEEVLLAEDETDVEQR		615.962	3	1844.86		83126.1		133210	113540	536600	248410	679031
U	AEEVLLAEDETDVEQRHPFDGALR		913.779	3	2738.31			2.287e+06		93152.1	439150		117486
U	QGSSSVSGSPAPSTSGTSTPR		967.956	2	1933.9	75654.1		845320		70193.1	152460
U	ESPSWVTQR		545.27	2	1088.53	477470		7563000			843670		421000
U	MLDLGLVLHQGAYFR		578.312	3	1731.91	432800		12517600		547040	1332800
U	DEQEEEEAANQK		473.867	3	1418.58	50747.1		520800			92672.1		86702.1
U	QLPQTPCTPRPLVSYSPAPR	Carbamidomethyl+Gln->pyro-Glu	750.056	3	2247.15			6.9958e+06		174860	589670		360754
N	ACLDFALSAKPLTR	Carbamidomethyl	781.922	2	1561.83	186060			73720.1		190140	61256.1
U	TFFQALMLLFR	Oxidation	701.881	2	1401.75				742750		1500500	831890	407385
U	QGSSSVSGSPAPSTSGTSTPR		645.64	3	1933.9	47710.1		1250440			130540
U	HGPPAHDDRER		429.538	3	1285.59			205000		13708.1	50499.1
N	KLQAMR		373.721	2	745.427			362480			62656.1	35744.1
U	SKTDLLNPEEAEDQLADLASVGSPFAR		958.477	3	2872.41	3242000		56490000			7627700
U	DSSLLGPHHLDEYVR		869.431	2	1736.85			1.6007e+06		64631.1	171280
U	MAGPAAPPGGSPR	Phospho	623.276	2	1244.54			1230620			122430		80935.1
U	SLFLFSEDNVVRK		777.42	2	1552.82	112490		2062000			348160
U	EVAEVSPLSAANMSLAVK	Phospho	948.463	2	1894.91	116970		2509600			402600
U	ELNGYMEWLSK	Oxidation	693.324	2	1384.63		36661.1		59462.1		232430
N	HMSPPLGLGK		518.784	2	1035.55	202990		3672800	136610				225431
U	AQEMFQK		441.213	2	880.411		109170	7.1958e+06			687950
U	GNDLSTLSDTSPMKR	Oxidation	546.598	3	1636.77			1.62446e+06		84450.1	253840
N	HMSPPLGLGK	Oxidation	526.781	2	1051.55			911720		48168.1	113910
U	LENSTFFHK		561.783	2	1121.55	78903.1				40936.1	167320
N	NLVVSLLNSMK		609.35	2	1216.68				324390	203800		465140
U	THLDRPLVVDPQENR		447.989	4	1787.93			3674600			474300
U	EHAPPREHAPWDADTER		504.235	4	2012.91			2300800			176880
U	VMAFGLLNYFR	Oxidation	673.85	2	1345.69			7.3958e+06	460320
U	MDLPVADDNTVHFNSTLMALLR		825.079	3	2472.21			4.1584e+07			4922800
U	YLLYEKNEVK		433.571	3	1297.69			10730400
U	VMAFGLLNYFR		665.852	2	1329.69								2047692
U	RHTHRPVAEGEPR		386.207	4	1540.8			278740
U	RRPGDEPDDRPER		532.261	3	1593.76
U	NSGLLTR		380.719	2	759.424
N	HMSPPLGLGKK		388.89	3	1163.65						110540
	SYGP1_MOUSE|F6SEU4	Ras/Rap GTPase-activating protein SynGAP
N	TLTLLAK		380.252	2	758.49	202560	77757.1	43012000	299670	402850	382040	249610	713969
U	LWLLEAR		450.769	2	899.523	232120	96548.1	41050000	246350	364780	409400	209670	706723
U	VLQNLANFSK		567.319	2	1132.62	338640	152960	92230000	550360	686520	639850	554450	1363738
U	AGYVGLVTVPVATLAGR		822.478	2	1642.94	334150	111540	49040000	404110	378350	423000	404480	848569
U	ALEEYMR		456.218	2	910.422	95933.1	45388.1	33206000	106280	106980	290970	125950	731877
U	RVDNVLK		422.256	2	842.497	299640	97906.1	61086000	295850	353780	453060	267010	943123
N	EVFASWR		447.727	2	893.439	83197.1		8700800	82455.1	93233.1	71292.1	67709.1	201415
N	LLSASLFLR		510.316	2	1018.62	456280		74474000	645100	673090	597860	449430	1524185
U	MLCAVLEPALNVK	Carbamidomethyl	729.396	2	1456.78	124580	23392.1	45806000	131800		270370	98017.1	547908
U	LLNDLSTALR		558.325	2	1114.63	568440		102926000	1100100	992910	875280	998880	2427077
U	LLDAQER		422.73	2	843.445	114220	40464.1	18207600		190010	1.62513e+06	147620	371523
U	DALGEFLR		460.745	2	919.476	204170		32722000	270070	237520	262770	287100
U	DLFYVSRPPLAR		478.601	3	1432.78	154550		30638000	155620	132840	211500		467215
U	MCCELALCK	Carbamidomethyl+Carbamidomethyl+Carbamidomethyl	592.75	2	1183.49	67417.1		32098000		82948.1	126380	41260.1	386600
U	KLEEYER		483.748	2	965.482	96598.1		22976000	50237.1	69684.1	100350		171615
U	QQQVEKDSQLK	Gln->pyro-Glu	657.338	2	1312.66	38281.1		24146000	38392.1	76474	88009.1		155908
U	LSQGSGSSLTAAGMR		711.854	2	1421.69			41178000	91751	67449	263630	71738.1	424723
U	LLMQYQAR	Oxidation	519.774	2	1037.53	70767.1		13076000	150580	86495.1		118380	216631
U	DLFYVSRPPLAR		717.399	2	1432.78	82859.1		10216400		38739.1	82193.1	44902.1	113215
U	LSQGSGSSLTAAGMR	Oxidation	719.851	2	1437.69		24882.1	8201200	145540	83758.1	50943.1	84864.1
U	DKWLENLQR		401.216	3	1200.63	97364.1	53989.1	26726000		119940	1.06148e+06		470646
U	GKEEVASALVHLLQSTGK		623.014	3	1866.02	115700	38229.1	50778000		136400	267070		520262
U	VVNSHCVFPR	Carbamidomethyl	405.541	3	1213.6	172430		62438000		233030	337240		813077
U	EHLLFR		407.732	2	813.45	68405.1		13395800	80618.1	90383.1			128412
U	GKEEVASALVHLLQSTGK		467.513	4	1866.02	81485.1		35350000		115190	122190		355938
U	EGSLGGSGGSGGGGGGGLKPSLTK		658.668	3	1972.98	278790		115402000		443870	428680		1062938
U	LLSQEEQTSK		581.801	2	1161.59	128560		30098000		127830	126270		372185
U	QLPPLGPTNPR	Gln->pyro-Glu	586.825	2	1171.63	129960		11773000	112100		131510		246477
U	GGEPPGDTFAPFHGYSK		588.606	3	1762.8			21210000	77760.1	126190	99071.1	64442.1	313754
U	ALYESEENCEVDPLK	Carbamidomethyl	898.406	2	1794.8		54834.1	34376000	155490	200860		135090	583877
N	ELKEVFASWR		422.228	3	1263.66	97472.1		18876600	60295.1	112100	138080
U	GSLPAMSYAPFR	Oxidation	656.821	2	1311.63	45834.1		5250000		34306.1	55116.1		78682.1
U	RLLSQEEQTSK		440.237	3	1317.69	85707.1		25006000		95240.1	73986.1	42391.1
U	AGYVGLVTVPVATLAGR		548.654	3	1642.94			13899800	152990	85624	108580		295877
U	DKAGYVGLVTVPVATLAGR		629.695	3	1886.06	58450.1		13253200	88729.1	68975.1	112270		253354
U	SVSMLDLQGDGPGGR		744.859	2	1487.7			28138000		34618.1	179960	77659	484308
U	LMLVEEELRR	Oxidation	435.239	3	1302.7	65226.1		11023000		115470	69059.1		260046
U	LMQSFK		377.202	2	752.389			18165600	32364.1		130430		378723
U	RLLSQEEQTSK		659.852	2	1317.69	45794.1		14541400		51628.1	68172.1
U	QLPPLGPTNPR		595.338	2	1188.66			4436000		58047.1	62107.1		70375.1
U	LSQMGVTTDGVPAQQLR		600.981	3	1799.92			10059800	61398.1		69819.1		181400
U	CTASSLAEHQANLR	Carbamidomethyl	519.919	3	1556.74			21530000		101160	94557.1	38190.1
U	YLKDALGEFLR		442.247	3	1323.72			26368000		197280	170840		229523
U	VKEYEEELHSLK		376.698	4	1502.76	93202.1		12453400			53072.1		290369
U	ELSTLHALLWEVLPQLSK		693.061	3	2076.16	679600		130590000	339410		862990	453810	2767077
U	LSQMGVTTDGVPAQQLR		900.967	2	1799.92			13358800	28041.1		139420		191000
U	SSPAYCTSSSDLTEPEQK	Carbamidomethyl	993.933	2	1985.85	66578.1		14983000	39548	43384.1	373390
N	LQLTENGEFR		603.809	2	1205.6				46847.1	73734.1		34177.1	118463
U	GPSAEMQGYMMR		679.288	2	1356.56			7273800			66812.1		140866
U	SQPMVLR		415.731	2	829.448			16620800			136240		360646
U	VKEYEEELHSLK		501.928	3	1502.76			6657000		30440.1			106048
U	LSQMGVTTDGVPAQQLR	Oxidation	908.965	2	1815.91			4114200	37059.1			39323.1
U	DKWLENLQR		601.32	2	1200.63	165070		11560400			207890
U	ALEEYMR	Oxidation	464.216	2	926.417			5890800				49786.1	110580
U	MCCELALCK	Carbamidomethyl+Carbamidomethyl+Carbamidomethyl+Oxidation	600.748	2	1199.48			5435800	44446.1		22115.1
U	DLNSSLDLQSFMAR		798.888	2	1595.76			23460000		51860.1	153970
U	YYCELCLDDMLYAR	Carbamidomethyl+Carbamidomethyl	942.902	2	1883.79			7849400			65993.1	28470.1
U	LLNDLSTALRNPNLQR		613.346	3	1837.02			14864600		281320	139200	44438.1
U	DHPAMAEPLPEPK	Oxidation	483.234	3	1446.68			3625200	32700.1			45128.1
U	SVSMLDLQGDGPGGR	Oxidation	752.857	2	1503.7			3738600	75859.1			60339
U	LSQMGVTTDGVPAQQLR	Oxidation	606.312	3	1815.91			4187200	84541.1			52701.1
U	AKDFLSDMAMSEVDR		572.264	3	1713.77			7566600	74574.1				246400
U	ALYESEENCEVDPLK	Carbamidomethyl	599.273	3	1794.8	2.9124e+06		3006800		2.2206e+06			145000
U	SQQLTVSAAQKPRPSSGNLLQSPEPSYGPARPR		701.772	5	3503.82			26154000		108970			365446
U	GREDLADR		466.233	2	930.452			1193360					30492.1
U	LLMQYQAR		511.776	2	1021.54			27884000					332154
N	ELKEVFASWR		632.838	2	1263.66			6501000		36538.1
U	GSLPAMSYAPFR		648.824	2	1295.63			6618800					143222
U	MLCAVLEPALNVK	Carbamidomethyl	486.6	3	1456.78			5750800					177046
U	DLNSSLDLQSFMAR		532.928	3	1595.76			3385600			83587.1
U	YQTMSLLPMELYK		808.907	2	1615.8			15587800					495585
U	YQTMSLLPMELYK	Oxidation	816.904	2	1631.79			5987400	74167.1
U	EEVASALVHLLQSTGK		561.309	3	1680.9			2148800		79485.1
U	VTLAPPWNGLAPPAPPPPPR		682.383	3	2044.13			4484000		34374.1
U	SASGDTVFWGEHFEFNNLPAVR		827.392	3	2479.16			165062000					1.02875e+06
U	LNSSSVSNLAAVGDLLHSSQASLTAALGLRPAPAGR		876.225	4	3500.87			1.8076e+06					2.68185e+06
U	LRQQQVEK		514.796	2	1027.58			279060
U	GLNSSMDMAR	Oxidation	549.239	2	1096.46			1252920
U	QQQVEKDSQLK		444.237	3	1329.69			3827800
U	GPSAEMQGYMMR	Oxidation	687.286	2	1372.56			1383620
U	EFAEYVTNHYR		714.831	2	1427.65			8326200
U	DHPAMAEPLPEPK		716.35	2	1430.69			4785000
U	DHPAMAEPLPEPK		477.903	3	1430.69			15283000
U	CTASSLAEHQANLR	Carbamidomethyl	779.376	2	1556.74			1203640
U	DLNSSLDLQSFMAR	Oxidation	806.885	2	1611.76			3768800
U	LPSPTKEKPPPPPPGGGK	Phospho	620.992	3	1859.95			6827600
U	GKEEVASALVHLLQSTGK		934.018	2	1866.02			4295800
U	YYCELCLDDMLYAR	Carbamidomethyl+Carbamidomethyl	628.937	3	1883.79			3448200
U	QHSQTPSTLNPTMPASER	Gln->pyro-Glu	655.643	3	1963.91			6230600
U	QHSQTPSTLNPTMPASER	Gln->pyro-Glu	982.96	2	1963.91			9897600
U	TQYVHSPYDRPGWNPR		658.319	3	1971.93			4342200
U	QHSQTPSTLNPTMPASER		661.318	3	1980.93			7804800
U	SSPAYCTSSSDLTEPEQK	Carbamidomethyl	662.958	3	1985.85			8136000
U	ELSTLHALLWEVLPQLSK		1039.09	2	2076.16			8452400
U	FLCPALMSPSLFGLMQEYPDEQTSR	Carbamidomethyl	973.124	3	2916.35			51062000
U	HFTEQWYPVTLPTGSGGSGGMGSGGGGGSGGGSGGK		1075.81	3	3224.42			4823400
U	SEDLSSGVPKPPAASLLHSHSYSDEFGPSGTDFTR		919.685	4	3674.71			7773000
U	SEDLSSGVPKPPAASLLHSHSYSDEFGPSGTDFTRR		767.17	5	3830.81			7793600
U	RLLDAQER		500.78	2	999.546
U	DHPAMAEPLPEPK	Oxidation	724.348	2	1446.68
U	TVSVPVEGRPHGEHEYHLGR		752.714	3	2255.12
	AFG32_MOUSE|Q8JZQ2	AFG3-like protein 2
N	QYQDLGAK		461.735	2	921.456	26039.1	30178.1	16995400	81649.1	29694.1		120416
U	LTTGAQDDLR		545.28	2	1088.55	48917.1		62002000	44777.1			67343.1
N	HFEQALER		515.259	2	1028.5		30731.1	135548000			43067.1
U	LTTGAQDDLRK		406.554	3	1216.64	54876.1	30761.1	215340000			52892.1
U	GALLTGPPGTGK		534.806	2	1067.6	67754.1		247147000	39836.1		59996.1		36582.1
N	VALLLLEK		449.802	2	897.59	74627.1		120774000		141320			424538
U	VTFTPGK		375.213	2	748.412	37334.1		100110000				26100.1
U	GLGYAQYLPK		555.303	2	1108.59	93683.1		79270000			34789.1
U	LDSALEK		388.213	2	774.412			16043600		165190			182005
N	EQLLDR		387.211	2	772.408		18733.1	72344680	38225.1		459430
U	VSEELFFGR		542.277	2	1082.54			206460000	21555.1
U	QLFLGPPDLK	Gln->pyro-Glu	555.813	2	1109.61			61418000			36257.1
U	VGQLSFDLPR		566.311	2	1130.61	73177.1		223840000					187769
U	NLETLQQELGLEGENR		614.978	3	1841.91			112834000			48358.1
U	HLSDALNEKHFEQALER		679.676	3	2036.01	108660		19968800			111090
U	KNAPCLLFLDELDAVGR	Carbamidomethyl	644.34	3	1930	61281.1		119839200
U	RGPAGLGR		392.233	2	782.451			29616000
U	DLFALAR		403.232	2	804.449			52050000
N	VLGGLEKK		422.269	2	842.523			3657800
U	LEVVNKR		429.264	2	856.513			7015600
N	VHLRPLK		431.785	2	861.555			7161000
U	TVALLTEK		437.766	2	873.517			154054000
U	MLDDEVR		439.208	2	876.401			95504000
U	MLDDEVR	Oxidation	447.205	2	892.396			17350800
N	QYQDLGAK	Gln->pyro-Glu	453.222	2	904.429			13692000
U	MCMTLGGR	Carbamidomethyl	463.206	2	924.398			80380000
U	EQYLYTK	Glu->pyro-Glu	463.735	2	925.455			4006800
U	MCMTLGGR	Carbamidomethyl+Oxidation	471.204	2	940.393			5685400
U	EQYLYTK		472.74	2	943.465			114980000
U	LLLSDAYR		475.769	2	949.523			79934000
U	MCMTLGGR	Carbamidomethyl+Oxidation+Oxidation	479.201	2	956.388			2419000
U	TVALLTEKK		501.813	2	1001.61			6807400
U	LDSALEKDK		509.774	2	1017.53			6803800
U	HLSDALNEK		513.764	2	1025.51			108556000
U	VLKDELDVK		529.808	2	1057.6			45864000
U	VRDLFALAR		530.817	2	1059.62			29820000
U	TQVLQPEEK		536.288	2	1070.56			54012000
U	EKEEPLNEK	Glu->pyro-Glu	549.277	2	1096.54			1111880
U	DFVNNYLSK		550.275	2	1098.53			87468000
U	LLLSDAYRR		553.819	2	1105.62			23040000
U	EKEEPLNEK		558.283	2	1114.55			3897200
U	EKEEPLNEK		372.524	3	1114.55			8702800
U	QLFLGPPDLK		564.327	2	1126.64			52980000
U	KTQVLQPEEK		600.335	2	1198.66			17206600
U	KTQVLQPEEK		400.559	3	1198.66			47684000
U	GVVDRLEVVNK		614.356	2	1226.7			5748800
U	KEDSHWWSR		410.86	3	1229.56			30002000
U	FKDVAGCEEAK	Carbamidomethyl	418.533	3	1252.58			18614400
U	FKDVAGCEEAK	Carbamidomethyl	627.295	2	1252.58			3282600
U	GKGLGYAQYLPK		432.243	3	1293.71			4196800
U	GMGGLFSVGETTAK		677.837	2	1353.66			144572000
U	GMGGLFSVGETTAK	Oxidation	685.835	2	1369.65			74334000
N	LELMEFVNFLK		691.873	2	1381.73			71382000
U	GDFPWDDKDFR		699.31	2	1396.6			8431800
U	GDFPWDDKDFR		466.542	3	1396.6			50942000
U	VALLLLEKEVLDK		494.976	3	1481.91			3498800
U	VHLRPLKLDSALEK		540.326	3	1617.96			7387600
U	EPQPSGPQPSGGAGGGGGK		811.382	2	1620.75			5476600
U	EPQPSGPQPSGGAGGGGGK		541.257	3	1620.75			2880800
U	KEPQPSGPQPSGGAGGGGGK		875.429	2	1748.84			676160
U	KEPQPSGPQPSGGAGGGGGK		583.955	3	1748.84			42996000
U	ELTWKDFVNNYLSK		878.949	2	1755.88			38408000
U	ELTWKDFVNNYLSK		586.302	3	1755.88			272200000
U	QGDMVLEKPYSEATAR	Gln->pyro-Glu	889.425	2	1776.84			77520000
U	QGDMVLEKPYSEATAR	Gln->pyro-Glu	593.286	3	1776.84			12418200
U	EPQPSGPQPSGGAGGGGGKR		593.291	3	1776.85			4101800
U	QGDMVLEKPYSEATAR	Gln->pyro-Glu+Oxidation	897.422	2	1792.83			18987200
U	QGDMVLEKPYSEATAR	Gln->pyro-Glu+Oxidation	598.617	3	1792.83			6642000
U	QGDMVLEKPYSEATAR		897.938	2	1793.86			1693680
U	QGDMVLEKPYSEATAR		598.961	3	1793.86			39606000
U	NAPCLLFLDELDAVGR	Carbamidomethyl	601.642	3	1801.9			97118000
U	QGDMVLEKPYSEATAR	Oxidation	604.293	3	1809.86			15615600
U	NLETLQQELGLEGENR		921.963	2	1841.91			88198000
U	VTQSAYAQLVQFGMNEK		638.652	3	1912.94			78924000
U	VTQSAYAQLVQFGMNEK		957.475	2	1912.94			49140000
U	VTQSAYAQLVQFGMNEK	Oxidation	965.472	2	1928.93			11096200
[truncated: 16,421 more rows]

## Sheet: mb_CL91_Abundancenorm
mouse brain, CL-91			Related to Figure 1C
[truncated: 1,000 more rows]

[truncated: 17 more sheets: mb_CL91_RatioDistance, rb_CL-47_PVs, rb_CL47_Abundancenorm, rb_CL47_RatioDistance, rb_CL-91_PVs, rb_CL91_Abundancenorm, rb_CL91_RatioDistance, TUCs, HEK293_CL-47_PVs, HEK293_CL47_Abundancenorm, HEK293_CL47_RatioDistance, HEK293_CL-91_PVs, HEK293_CL91_Abundancenorm, HEK293_CL91_RatioDistance, rel_Abundance_CL-47, rel_Abundance_CL-91, csBN-MS_AbundanceValues]
