# Supplementary material for: The molecular appearance of native TRPM7 channel complexes identified by high-resolution proteomics
Source: eLife. 2021 Nov 12;10:e68544. doi: 10.7554/eLife.68544 (PMC8616561; doi:10.7554/eLife.68544)
Supplement: Supplementary file 2. [file elife-68544-supp2.xlsx]

## Sheet: Tabelle1
Protein	Site	Phosphopeptide sequence	identified in		Mascot score		previously identified in
			HEK293	brain	HEK293	brain	cells	native tissue
TRPM7	S101	HTEQSPTDAYGVLNFQGGpSHSYR	x		45.5		63), 64)
	S554	NTSSpSTPQLRK	x		29.1		62)
	S561	pSHETFGNR	x		26.6		62)
	S1208	VEQMpSLQLK	X		37.5
	S1230	SLQSLDpSQLGHLQDLSALTVDTLK	x		62.8		64)
	S1255	TLTAQKApSEASK	x	x	69.2	68.8	62), 64)	65)
	S1258	ASEApSKVHNELTR	x		45.9		62), 64)
	S1269	ELpSLSK	x		28		62), 64)	65)
	S1271	ELSLpSKHLAQNLLDDVPVRPLWK	x		44.8		64)
	T1296	KPSAVNpTLSSSLPQGDR	x		30.7		62)
	S1300	KPSAVNTLSSpSLPQGDR	x	X	111.2	42.5	62)
	S1360	EFNIPEAGSSCGALFPSAVpSPPELR	x	X	40.4	48.1	62), 64)
	S1385	LGpSSPNSSPHMSSPPTK	x		79.1		62), 63)
	S1386	LGSpSPNSSPHMSSPPTK	x	x	52.1	49.2	62), 63), 64)	65)
	S1389	LGSSPNpSSPHMSSPPTK	x		48.4		63), 64)
	S1394	LGSSPNSSPHMpSSPPTK	x		40.4		63), 64)
	S1395	LGSSSTSIPHLSpSPPTK (human)	x		41.6		62), 64)
	S1403	FSVpSTPSQPSCK	x	x	46	38.5	62), 63), 64)	65)
	S1445	AAEGDNIEFGAFVGHRDpSMDLQR	x		57.8			65)
	T1466	ELLSNDpTPENTLK	x	X	64.3	73.5	62)
	S1480	HVGAAGYpSECCK	X		49.4
	T1485	pTSTSLHSVQAESCpSR	x		34.1		64)
	S1488	TSTpSLHSVQAESCSR	x	x	70.5	51.4	62)	65)
	S1491	TSTSLHpSVQAESCSR	x		68.8			65)
	S1496	TSTSLHSVQAEpSCSR	X		43.9
	S1498	TSTSLHSVQAESCpSR	x		52.2			65)
	S1502	RApSTEDSPEVDSK	x	x	74.1	69.8	62), 64)	65)
	S1506	RASTEDpSPEVDSK	x		60.9		62)
	S1565	LpSQSIPFVPVPPR	x		38.3		62), 64)	65)
	S1567	LSQpSIPFVPVPPR	x	X	52.2	28.1	62), 63), 64)
	S1613	IEFLpSKEEMGGGLR	x		42.9		62), 64)
	S1839	IIFPQDEpSSDLNLQSGNSTK	x		52.7		64)
	S1846	IIFPQDESSDLNLQpSGNSTK	x		42.9		64)
	S1849	IIFPQDESSDLNLQSGNpSTK	x		41.3		63), 64)
	S1853	IIFPQDESSDLNLQSGNSTKEpSEATNSVR	X		47.3
CNNM3	S700	TTTAAGSSHSRPGVPVEGpSPGRNPGV	x		62.1		63)
CNNM4	S664	SASLSYPDR	x		21.6		63)
